# Supplementary material for: Urinary Exosomes of Patients with Cystic Fibrosis Unravel CFTR-Related Renal Disease
Source: Int J Mol Sci. 2020 Sep 10;21(18):6625. doi: 10.3390/ijms21186625 (PMC7554933; doi:10.3390/ijms21186625)
Supplement: Supplementary file 1 [file ijms-21-06625-s001.zip]

Archive with 4 entries (4 files):
- ijms-904635 (supplementary figures).pdf
- Supplementary table S2.xlsx
- Supplementary table S3.xlsx
- Supplemetary table S1.xlsx
