# Supplementary material for: Urinary Exosomes of Patients with Cystic Fibrosis Unravel CFTR-Related Renal Disease
Source: Int J Mol Sci. 2020 Sep 10;21(18):6625. doi: 10.3390/ijms21186625 (PMC7554933; doi:10.3390/ijms21186625)
Supplement: Supplementary file 1 [file ijms-21-06625-s001.zip › Supplementary table S2.xlsx]

## Sheet: CN vs CFNT vs CFT
N2	N3	N4	N5	N6	N7	N8	N9	CF8_NT	CF10_NT	CF13_NT	CF17_NT	CF18_NT	CF19_NT	CF21_NT	CF22_NT	CF24_NT	CF25_NT	CF26_NT	CF29_NT	CF2_T	CF3_T	CF9_T	CF12_T	CF15_T	CF23_T	CF30_T	C: GOBP name	C: GOMF name	C: GOCC name	C: KEGG name	C: GSEA	REPORTED ENRICHED CLASSES	C: Keywords	C: Student's T-test Significant CN vs CF_NT	C: Student's T-test Significant CF_NT vs CF_T	C: Student's T-test Significant CN vs CF_T	C: Student's T-test significant	C: ANOVA Significant	T: T: Protein names	T: T: Gene names	T: T: Protein IDs	T: T: Majority protein IDs	T: T: Protein Ac	N: N: Peptides	N: N: Intensity	N: N: MS/MS count	N: Student's T-test p-value N_CF_NT	N: Student's T-test q-value N_CF_NT	N: Student's T-test Difference N_CF_NT
19.6376	19.57	18.4128	19.1345	20.2141	24.9169	25.4735	26.3386	26.1262	25.4044	27.8425	26.5722	28.6736	24.8486	25.4162	26.8939	28.666	27.6471	26.3884	25.657	25.8541	26.9079	26.2747	24.9068	24.5937	28.5752	25.6176	activation of phospholipase A2 activity;activation of phospholipase A2 activity by calcium-mediated signaling;activation of phospholipase C activity;alkanesulfonate metabolic process;anatomical structure development;anatomical structure morphogenesis;astrocyte activation;axon guidance;behavior;biological adhesion;biological regulation;biosynthetic process;calcium-mediated signaling;cation homeost…	actin binding;actin filament binding;adenyl nucleotide binding;adenyl ribonucleotide binding;ATP binding;binding;catalytic activity;chromatin binding;cytoskeletal protein binding;DNA binding;double-stranded DNA binding;enzyme binding;epidermal growth factor-activated receptor activity;identical protein binding;kinase activity;MAP kinase kinase kinase activity;molecular transducer activity;nucleic…	adherens junction;anchoring junction;apical plasma membrane;basolateral plasma membrane;cell junction;cell part;cell surface;cell-substrate adherens junction;cell-substrate junction;cytoplasm;cytoplasmic membrane-bounded vesicle;cytoplasmic part;cytoplasmic vesicle;early endosome membrane;endocytic vesicle;endoplasmic reticulum membrane;endoplasmic reticulum part;endosomal part;endosome;endosome …	Adherens junction;Bladder cancer;Calcium signaling pathway;Cytokine-cytokine receptor interaction;Dorso-ventral axis formation;Endocytosis;Endometrial cancer;Epithelial cell signaling in Helicobacter pylori infection;ErbB signaling pathway;Focal adhesion;Gap junction;Glioma;GnRH signaling pathway;Hepatitis C;MAPK signaling pathway;MAPK signaling pathway - fly;Melanoma;Non-small cell lung cancer;P…	ACTGTGA,MIR-27A,MIR-27B;ACTIN_BINDING;ACTIN_FILAMENT_BINDING;AFFAR_YY1_TARGETS_UP;AMIT_EGF_RESPONSE_480_HELA;APPIERTO_RESPONSE_TO_FENRETINIDE_DN;BENPORATH_EED_TARGETS;BIOCARTA_AGR_PATHWAY;BIOCARTA_AT1R_PATHWAY;BIOCARTA_CARDIACEGF_PATHWAY;BIOCARTA_CBL_PATHWAY;BIOCARTA_EGF_PATHWAY;BIOCARTA_EGFR_SMRTE_PATHWAY;BIOCARTA_ERK_PATHWAY;BIOCARTA_HER2_PATHWAY;BIOCARTA_KERATINOCYTE_PATHWAY;BIOCARTA_MCALPAIN_…	---	3D-structure;Alternativesplicing;ATP-binding;Cellmembrane;Completeproteome;Developmentalprotein;Directproteinsequencing;Diseasemutation;Disulfidebond;Endoplasmicreticulum;Endosome;Glycoprotein;Golgiapparatus;Isopeptidebond;Kinase;Membrane;Methylation;Nucleotide-binding;Nucleus;Phosphoprotein;Polymorphism;Receptor;Referenceproteome;Repeat;Secreted;Signal;Transferase;Transmembrane;Transmembraneheli…	+		+	Control vs CFNT;Control vs CFT	+	Epidermal growth factor receptor	EGFR	P00533	P00533	EGFR_HUMAN	10	2146100000	243	0.000145833	0.0008	-4.96577
19.4038	19.1895	25.2454	23.1731	23.624	22.6547	18.8375	26.0759	26.6271	24.0098	24.0838	25.5281	25.8322	24.9445	24.0743	25.9825	26.1893	26.7089	24.9938	26.8445	23.7927	26.1864	27.0411	24.8586	23.4193	26.4926	25.8968	biological regulation;cell differentiation;cellular developmental process;cellular process;developmental process;hemopoietic progenitor cell differentiation;negative regulation of biological process;negative regulation of catabolic process;negative regulation of catalytic activity;negative regulation of endopeptidase activity;negative regulation of hydrolase activity;negative regulation of macrom…	binding;endopeptidase inhibitor activity;endopeptidase regulator activity;enzyme binding;enzyme inhibitor activity;enzyme regulator activity;peptidase inhibitor activity;peptidase regulator activity;protein binding;serine-type endopeptidase inhibitor activity	cell part;cytoplasm;extracellular membrane-bounded organelle;extracellular organelle;extracellular region part;extracellular space;extracellular vesicular exosome;intracellular part;membrane-bounded organelle;membrane-bounded vesicle;organelle;vesicle		ACEVEDO_LIVER_CANCER_WITH_H3K27ME3_UP;ACEVEDO_METHYLATED_IN_LIVER_CANCER_DN;BRUINS_UVC_RESPONSE_VIA_TP53_GROUP_A;chr18q21;ENZYME_INHIBITOR_ACTIVITY;ENZYME_REGULATOR_ACTIVITY;GSE14026_TH1_VS_TH17_UP;GSE17974_IL4_AND_ANTI_IL12_VS_UNTREATED_6H_ACT_CD4_TCELL_UP;GSE2706_R848_VS_LPS_2H_STIM_DC_UP;IWANAGA_CARCINOGENESIS_BY_KRAS_UP;PROTEASE_INHIBITOR_ACTIVITY;SERINE_TYPE_ENDOPEPTIDASE_INHIBITOR_ACTIVITY;…	---	Alternativesplicing;Completeproteome;Cytoplasm;Polymorphism;Proteaseinhibitor;Referenceproteome;Serineproteaseinhibitor	+		+	Control vs CFNT;Control vs CFT	+	Serpin B12	SERPINB12	Q96P63	Q96P63	SPB12_HUMAN	11	1906300000	200	0.00194519	0.01475	-3.20941
19.8283	20.1488	18.3759	19.6398	19.8413	21.948	22.1177	18.1394	25.126	22.5727	19.5421	24.5897	23.4629	22.4352	23.1288	23.0098	19.8247	24.5644	23.3914	24.0001	24.5465	23.3422	23.0706	24.7765	23.7293	24.9543	19.3594	amine metabolic process;aminoglycan catabolic process;aminoglycan metabolic process;carbohydrate catabolic process;carbohydrate metabolic process;catabolic process;cellular macromolecule metabolic process;cellular metabolic process;cellular process;glycoprotein metabolic process;glycosaminoglycan catabolic process;glycosaminoglycan metabolic process;macromolecule catabolic process;macromolecule m…	binding;catalytic activity;cation binding;hydrolase activity;hydrolase activity, acting on acid sulfur-nitrogen bonds;hydrolase activity, acting on ester bonds;ion binding;metal ion binding;N-sulfoglucosamine sulfohydrolase activity;sulfuric ester hydrolase activity	cell part;cytoplasmic part;extracellular membrane-bounded organelle;extracellular organelle;extracellular region part;extracellular vesicular exosome;intracellular organelle lumen;intracellular organelle part;intracellular part;lysosomal lumen;membrane-bounded organelle;membrane-bounded vesicle;membrane-enclosed lumen;organelle;organelle lumen;organelle part;vacuolar lumen;vacuolar part;vesicle	Glycosaminoglycan degradation;Lysosome	BHATI_G2M_ARREST_BY_2METHOXYESTRADIOL_DN;BOSCO_ALLERGEN_INDUCED_TH2_ASSOCIATED_MODULE;CARBOHYDRATE_METABOLIC_PROCESS;CELLULAR_CARBOHYDRATE_METABOLIC_PROCESS;CELLULAR_MACROMOLECULE_METABOLIC_PROCESS;CELLULAR_PROTEIN_METABOLIC_PROCESS;chr17q25;DER_IFN_BETA_RESPONSE_DN;GSE13306_TREG_VS_TCONV_SPLEEN_DN;GSE13485_DAY1_VS_DAY21_YF17D_VACCINE_PBMC_UP;GSE13485_DAY1_VS_DAY7_YF17D_VACCINE_PBMC_UP;GSE13493_D…	---	3D-structure;Calcium;Completeproteome;Directproteinsequencing;Diseasemutation;Glycoprotein;Hydrolase;Lysosome;Metal-binding;Mucopolysaccharidosis;Polymorphism;Referenceproteome;Signal	+		+	Control vs CFNT;Control vs CFT	+	N-sulphoglucosamine sulphohydrolase	SGSH	P51688	P51688	SPHM_HUMAN	6	407480000	43	0.000879688	0.0106667	-2.96574
18.9779	18.2108	19.4695	19.5672	19.674	20.5806	18.0591	19.6979	23.439	25.3101	20.9394	19.263	19	21.9635	20.1874	22.8878	23.0242	21.403	21.6468	22.3155	22.366	26.5502	21.7718	21.9096	23.9004	21.909	22.7858	activation of immune response;activation of innate immune response;anaphase-promoting complex-dependent proteasomal ubiquitin-dependent protein catabolic process;antigen processing and presentation;antigen processing and presentation of exogenous antigen;antigen processing and presentation of exogenous peptide antigen;antigen processing and presentation of exogenous peptide antigen via MHC class …	catalytic activity;endopeptidase activity;hydrolase activity;peptidase activity;peptidase activity, acting on L-amino acid peptides;threonine-type endopeptidase activity;threonine-type peptidase activity	cell part;cytoplasm;cytoplasmic part;cytosol;extracellular membrane-bounded organelle;extracellular organelle;extracellular region part;extracellular vesicular exosome;intracellular membrane-bounded organelle;intracellular organelle;intracellular organelle part;intracellular part;macromolecular complex;membrane-bounded organelle;membrane-bounded vesicle;nuclear part;nucleoplasm;nucleus;organelle;…	Proteasome	ACEVEDO_NORMAL_TISSUE_ADJACENT_TO_LIVER_TUMOR_DN;BASSO_B_LYMPHOCYTE_NETWORK;BENPORATH_MYC_MAX_TARGETS;BIOCARTA_PROTEASOME_PATHWAY;BORCZUK_MALIGNANT_MESOTHELIOMA_UP;BRUINS_UVC_RESPONSE_LATE;BYSTRYKH_HEMATOPOIESIS_STEM_CELL_QTL_TRANS;chr9q34;DANG_BOUND_BY_MYC;ENK_UV_RESPONSE_KERATINOCYTE_UP;FEVR_CTNNB1_TARGETS_DN;GGGCGGR_V$SP1_Q6;GNF2_G22P1;GNF2_XRCC5;GRADE_COLON_AND_RECTAL_CANCER_UP;GRADE_COLON_CA…	---	3D-structure;Alternativesplicing;Completeproteome;Cytoplasm;Directproteinsequencing;Host-virusinteraction;Hydrolase;Nucleus;Polymorphism;Protease;Proteasome;Referenceproteome;Threonineprotease;Zymogen	+		+	Control vs CFNT;Control vs CFT	+	Proteasome subunit beta type-7	PSMB7	Q99436	Q99436	PSB7_HUMAN	3	268590000	26	0.0018395	0.0173333	-2.50202
23.0748	22.9264	24.5897	22.6709	23.0343	21.9525	23.7071	24.8536	26.4109	23.879	25.4862	25.8903	25.4866	25.6393	22.8025	25.6403	26.6877	26.5568	25.3071	26.7112	22.8741	27.8535	26.5373	24.3627	23.4011	26.9301	26.12	anatomical structure morphogenesis;cell differentiation;cell envelope organization;cellular component assembly;cellular component organization;cellular component organization or biogenesis;cellular developmental process;cellular macromolecule metabolic process;cellular metabolic process;cellular process;cellular protein metabolic process;developmental process;epidermal cell differentiation;epithe…	binding;calcium ion binding;catalytic activity;cation binding;ion binding;metal ion binding;protein-glutamine gamma-glutamyltransferase activity;transferase activity;transferase activity, transferring acyl groups;transferase activity, transferring amino-acyl groups	cell part;cytoplasm;extracellular membrane-bounded organelle;extracellular organelle;extracellular region part;extracellular vesicular exosome;extrinsic to internal side of plasma membrane;extrinsic to membrane;extrinsic to plasma membrane;intracellular part;membrane part;membrane-bounded organelle;membrane-bounded vesicle;organelle;plasma membrane part;vesicle		ANATOMICAL_STRUCTURE_DEVELOPMENT;ANATOMICAL_STRUCTURE_MORPHOGENESIS;BIOPOLYMER_METABOLIC_PROCESS;BIOPOLYMER_MODIFICATION;BOSCO_EPITHELIAL_DIFFERENTIATION_MODULE;BROWNE_HCMV_INFECTION_30MIN_DN;CALCIUM_ION_BINDING;CATION_BINDING;CELLULAR_COMPONENT_ASSEMBLY;CELLULAR_MACROMOLECULE_METABOLIC_PROCESS;CELLULAR_PROTEIN_METABOLIC_PROCESS;chr20q11;CROMER_TUMORIGENESIS_DN;CYCLIN_D1_KE_.V1_DN;CYTOPLASM;DAZAR…	---	3D-structure;Acetylation;Acyltransferase;Calcium;Completeproteome;Directproteinsequencing;Keratinization;Metal-binding;Phosphoprotein;Polymorphism;Referenceproteome;Transferase;Zymogen	+		+	Control vs CFNT;Control vs CFT		Protein-glutamine gamma-glutamyltransferase E;Protein-glutamine gamma-glutamyltransferase E 50 kDa catalytic chain;Protein-glutamine gamma-glutamyltransferase E 27 kDa non-catalytic chain	TGM3	Q08188	Q08188	TGM3_HUMAN	19	1957100000	283	0.000363072	0.0108571	-2.19033
23.3126	19.4799	22.0008	22.7317	22.9507	19.5752	23.1259	19.6328	24.6163	26.2643	23.6375	23.3119	23.1687	24.4134	22.5093	24.645	23.8485	23.1871	22.6342	22.9135	24.1487	27.158	23.1691	22.42	24.6632	22.8828	23.4751	activation of immune response;activation of innate immune response;anaphase-promoting complex-dependent proteasomal ubiquitin-dependent protein catabolic process;antigen processing and presentation;antigen processing and presentation of exogenous antigen;antigen processing and presentation of exogenous peptide antigen;antigen processing and presentation of exogenous peptide antigen via MHC class …	catalytic activity;endopeptidase activity;hydrolase activity;peptidase activity;peptidase activity, acting on L-amino acid peptides;threonine-type endopeptidase activity;threonine-type peptidase activity	cell part;cytoplasm;cytoplasmic part;cytosol;extracellular membrane-bounded organelle;extracellular organelle;extracellular region part;extracellular vesicular exosome;Golgi apparatus;intracellular membrane-bounded organelle;intracellular organelle;intracellular organelle part;intracellular part;macromolecular complex;membrane-bounded organelle;membrane-bounded vesicle;nuclear part;nucleoplasm;nu…	Proteasome	BASAKI_YBX1_TARGETS_UP;BIOCARTA_PROTEASOME_PATHWAY;BLALOCK_ALZHEIMERS_DISEASE_DN;BORCZUK_MALIGNANT_MESOTHELIOMA_UP;BYSTRYKH_HEMATOPOIESIS_STEM_CELL_AND_BRAIN_QTL_CIS;BYSTRYKH_HEMATOPOIESIS_STEM_CELL_QTL_CIS;BYSTRYKH_SCP2_QTL;CASORELLI_ACUTE_PROMYELOCYTIC_LEUKEMIA_DN;CHARAFE_BREAST_CANCER_LUMINAL_VS_MESENCHYMAL_DN;CHESLER_BRAIN_QTL_CIS;chr17p13;GCM_BECN1;GSE1460_CORD_VS_ADULT_BLOOD_NAIVE_CD4_TCELL…	KEGG_PROTEASOME_Yes	3D-structure;Acetylation;Completeproteome;Cytoplasm;Directproteinsequencing;Host-virusinteraction;Hydrolase;Nucleus;Polymorphism;Protease;Proteasome;Referenceproteome;Threonineprotease;Zymogen	+		+	Control vs CFNT;Control vs CFT		Proteasome subunit beta type-6	PSMB6	P28072	P28072	PSB6_HUMAN	4	612610000	48	0.00277644	0.0217455	-2.16126
26.3754	25.3885	28.5606	27.0743	27.5975	26.6484	26.1287	29.0086	28.6434	27.9539	28.6409	29.4211	28.8356	28.5999	27.4466	29.2051	29.5299	29.7958	28.344	31.0891	27.0474	32.4025	31.1428	27.7009	27.2194	30.5788	29.916	adherens junction organization;anatomical structure development;anatomical structure morphogenesis;apoptosis;cardiac muscle tissue morphogenesis;cell death;cell differentiation;cell junction organization;cell-cell junction organization;cellular component disassembly;cellular component disassembly at cellular level;cellular component disassembly involved in apoptosis;cellular component organizatio…	binding;binding, bridging;enzyme binding;kinase binding;protein binding;protein binding, bridging;protein kinase binding;protein kinase C binding;scaffold protein binding;structural constituent of cytoskeleton;structural molecule activity	adherens junction;anchoring junction;basolateral plasma membrane;cell junction;cell part;cell-cell adherens junction;cell-cell contact zone;cell-cell junction;cornified envelope;cytoplasmic part;cytoskeletal part;cytoskeleton;desmosome;extracellular membrane-bounded organelle;extracellular organelle;extracellular region part;extracellular vesicular exosome;fascia adherens;intercalated disc;interm…	Arrhythmogenic right ventricular cardiomyopathy (ARVC)	AIGNER_ZEB1_TARGETS;ANATOMICAL_STRUCTURE_DEVELOPMENT;BENPORATH_CYCLING_GENES;BENPORATH_EED_TARGETS;BIDUS_METASTASIS_UP;BIOPOLYMER_METABOLIC_PROCESS;BIOPOLYMER_MODIFICATION;BLALOCK_ALZHEIMERS_DISEASE_UP;BOQUEST_STEM_CELL_CULTURED_VS_FRESH_UP;BOYLAN_MULTIPLE_MYELOMA_C_D_DN;BROWNE_HCMV_INFECTION_30MIN_DN;BROWNE_HCMV_INFECTION_6HR_DN;CAGGTG_V$E12_Q6;CELLULAR_MACROMOLECULE_METABOLIC_PROCESS;CELLULAR_P…	---	3D-structure;Alternativesplicing;Cardiomyopathy;Celljunction;Coiledcoil;Completeproteome;Cytoplasm;Cytoskeleton;Diseasemutation;Epidermolysisbullosa;Lipoprotein;Palmoplantarkeratoderma;Phosphoprotein;Polymorphism;Referenceproteome;Repeat	+		+	Control vs CFNT;Control vs CFT		Desmoplakin	DSP	P15924	P15924	DESP_HUMAN	124	35381000000	1623	0.00124844	0.0178378	-1.86102
25.8668	26.0511	26.7027	26.6532	25.6395	26.4271	25.4722	27.0216	29.7375	27.4979	25.6607	29.173	28.2185	27.878	29.3061	27.967	26.3608	29.2404	26.1525	26.4812	27.3097	26.3384	27.5016	28.0668	31.2245	27.3006	28.1688	biological regulation;cation homeostasis;cation transport;cellular cation homeostasis;cellular chemical homeostasis;cellular component organization;cellular component organization or biogenesis;cellular homeostasis;cellular ion homeostasis;cellular iron ion homeostasis;cellular membrane organization;cellular metal ion homeostasis;cellular process;chemical homeostasis;endocytosis;establishment of …	binding;cation binding;ferric iron binding;identical protein binding;ion binding;iron ion binding;metal ion binding;protein binding;transition metal ion binding	cell part;cytoplasmic part;cytosol;extracellular membrane-bounded organelle;extracellular organelle;extracellular region part;extracellular vesicular exosome;ferritin complex;intracellular ferritin complex;intracellular part;macromolecular complex;membrane;membrane-bounded organelle;membrane-bounded vesicle;organelle;protein complex;vesicle	Mineral absorption;Porphyrin and chlorophyll metabolism	BAELDE_DIABETIC_NEPHROPATHY_UP;BANDRES_RESPONSE_TO_CARMUSTIN_MGMT_48HR_DN;BENPORATH_SOX2_TARGETS;BLALOCK_ALZHEIMERS_DISEASE_UP;BOCHKIS_FOXA2_TARGETS;BRUINS_UVC_RESPONSE_LATE;BUYTAERT_PHOTODYNAMIC_THERAPY_STRESS_UP;CAGCTTT,MIR-320;CATION_HOMEOSTASIS;CELLULAR_CATION_HOMEOSTASIS;CELLULAR_HOMEOSTASIS;CHEMICAL_HOMEOSTASIS;CHOI_ATL_STAGE_PREDICTOR;chr19q13;CTTTGT_V$LEF1_Q2;DANG_REGULATED_BY_MYC_DN;DARW…	---	3D-structure;Acetylation;Cataract;Completeproteome;Directproteinsequencing;Diseasemutation;Iron;Ironstorage;Metal-binding;Neurodegeneration;Referenceproteome	+		+	Control vs CFNT;Control vs CFT		Ferritin light chain	FTL	P02792	P02792	FRIL_HUMAN	10	14460000000	550	0.0073409	0.0381789	-1.57686
26.642	26.3373	25.9314	26.3947	26.6944	26.4183	25.8484	26.8292	24.7589	25.2937	25.2119	26.339	25.7158	26.1941	25.8773	25.5104	25.6488	25.544	25.4459	24.9421	23.5984	24.4679	26.1633	25.6114	25.3541	25.5784	25.3502	actin cytoskeleton organization;actin filament-based process;anatomical structure development;anatomical structure morphogenesis;apical junction assembly;apolipoprotein A-I-mediated signaling pathway;axon guidance;biological regulation;blood coagulation;cell activation;cell cycle process;cell junction assembly;cell junction organization;cell migration;cell motility;cell surface receptor linked si…	binding;catalytic activity;cytoskeletal protein binding;GTP binding;GTPase activity;guanyl nucleotide binding;guanyl ribonucleotide binding;hydrolase activity;hydrolase activity, acting on acid anhydrides;hydrolase activity, acting on acid anhydrides, in phosphorus-containing anhydrides;myosin binding;nucleoside-triphosphatase activity;nucleotide binding;protein binding;purine nucleotide binding;…	adherens junction;anchoring junction;apical junction complex;cell cortex;cell division site part;cell junction;cell part;cell projection;cell-cell junction;cell-substrate adherens junction;cell-substrate junction;cleavage furrow;cytoplasmic part;cytoskeleton;cytosol;endoplasmic reticulum membrane;endoplasmic reticulum part;endosome;extracellular membrane-bounded organelle;extracellular organelle;…	Adherens junction;Axon guidance;Bacterial invasion of epithelial cells;Chemokine signaling pathway;Colorectal cancer;Endocytosis;Focal adhesion;ko05152;Leukocyte transendothelial migration;Neurotrophin signaling pathway;Pancreatic secretion;Pathogenic Escherichia coli infection;Pathways in cancer;Regulation of actin cytoskeleton;T cell receptor signaling pathway;TGF-beta signaling pathway;Tight j…	ABDELMOHSEN_ELAVL4_TARGETS;ACEVEDO_METHYLATED_IN_LIVER_CANCER_DN;ACTIN_CYTOSKELETON_ORGANIZATION_AND_BIOGENESIS;ACTIN_FILAMENT_BASED_PROCESS;ACTTTAT,MIR-142-5P;ALCALA_APOPTOSIS;ATCTTGC,MIR-31;BIOCARTA_AKAP13_PATHWAY;BIOCARTA_AKAPCENTROSOME_PATHWAY;BIOCARTA_CARDIACEGF_PATHWAY;BIOCARTA_CCR3_PATHWAY;BIOCARTA_CDC42RAC_PATHWAY;BIOCARTA_ECM_PATHWAY;BIOCARTA_EDG1_PATHWAY;BIOCARTA_INTEGRIN_PATHWAY;BIOCAR…	---	3D-structure;ADP-ribosylation;Cellcycle;Celldivision;Cellmembrane;Cellprojection;Completeproteome;Cytoplasm;Cytoskeleton;Directproteinsequencing;GTP-binding;Host-virusinteraction;Lipoprotein;Magnesium;Membrane;Methylation;Nucleotide-binding;Phosphoprotein;Prenylation;Proto-oncogene;Referenceproteome;Ublconjugation	+		+	Control vs CFNT;Control vs CFT	+	Transforming protein RhoA	RHOA	P61586	P61586	RHOA_HUMAN	6	2892200000	284	0.000358489	0.0221111	0.846804
24.477	25.1873	25.7222	25.578	25.2967	25.1604	25.2805	25.6059	23.5437	23.6891	24.3477	24.3483	24.5801	25.5736	24.3016	24.4767	24.0299	25.0417	24.097	23.7957	23.6856	23.8327	24.6832	24.1603	24.7753	24.691	23.7674	biological regulation;biosynthetic process;cellular biosynthetic process;cellular component organization;cellular component organization or biogenesis;cellular macromolecule biosynthetic process;cellular macromolecule metabolic process;cellular metabolic process;cellular nitrogen compound metabolic process;cellular process;early endosome to late endosome transport;endocytic recycling;endosome tra…	binding;channel regulator activity;identical protein binding;protein binding;protein C-terminus binding;protein dimerization activity;protein homodimerization activity;protein N-terminus binding;transcription factor binding	cell part;cytoplasm;cytoplasmic part;cytosol;endosomal part;endosome;endosome membrane;ESCRT II complex;extracellular membrane-bounded organelle;extracellular organelle;extracellular region part;extracellular vesicular exosome;intracellular membrane-bounded organelle;intracellular organelle;intracellular organelle part;intracellular part;late endosome membrane;macromolecular complex;membrane;memb…	Endocytosis	AGUIRRE_PANCREATIC_CANCER_COPY_NUMBER_UP;BIOPOLYMER_METABOLIC_PROCESS;CAGCAGG,MIR-370;CASORELLI_ACUTE_PROMYELOCYTIC_LEUKEMIA_DN;chr17q21;GKCGCNNNNNNNTGAYG_UNKNOWN;GRAESSMANN_RESPONSE_TO_MC_AND_DOXORUBICIN_UP;GSE11864_UNTREATED_VS_CSF1_IFNG_IN_MAC_DN;GSE12845_PRE_GC_VS_DARKZONE_GC_TONSIL_BCELL_DN;GSE13411_IGM_VS_SWITCHED_MEMORY_BCELL_UP;GSE14000_TRANSLATED_RNA_VS_MRNA_16H_LPS_DC_DN;GSE14308_NAIVE_…	REACTOME_ENDOSOMAL_SORTING_COMP_Yes	3D-structure;Alternativesplicing;Coiledcoil;Completeproteome;Cytoplasm;Endosome;Membrane;Nucleus;Proteintransport;Referenceproteome;Transcription;Transcriptionregulation;Transport	+		+	Control vs CFNT;Control vs CFT	+	Vacuolar-sorting protein SNF8	SNF8	Q96H20	Q96H20	SNF8_HUMAN	6	1086000000	112	0.000564736	0.0215294	0.969742
24.7961	25.1258	25.7195	25.0252	25.5082	25.3017	24.3815	25.515	22.7728	23.5471	24.0522	23.4563	24.919	25.4865	24.7182	24.3272	24.0232	25.0099	24.3142	23.2406	22.8195	22.3896	24.2706	24.6256	24.6569	24.6948	22.9465					ACEVEDO_LIVER_TUMOR_VS_NORMAL_ADJACENT_TISSUE_UP;CCACACA,MIR-147;CHEN_METABOLIC_SYNDROM_NETWORK;chr10q24;CRX_DN.V1_UP;CTCAGGG,MIR-125B,MIR-125A;FORTSCHEGGER_PHF8_TARGETS_DN;GSE10239_MEMORY_VS_KLRG1INT_EFF_CD8_TCELL_UP;GSE11924_TFH_VS_TH17_CD4_TCELL_DN;GSE13493_DP_VS_CD8POS_THYMOCYTE_UP;GSE14308_NAIVE_CD4_TCELL_VS_NATURAL_TREG_UP;GSE14769_UNSTIM_VS_120MIN_LPS_BMDM_UP;GSE16522_MEMORY_VS_NAIVE_CD8_T…	---	Completeproteome;Referenceproteome	+		+	Control vs CFNT;Control vs CFT		Ubiquitin domain-containing protein 1	UBTD1	Q9HAC8	Q9HAC8	UBTD1_HUMAN	6	1032500000	101	0.00441696	0.0439398	1.01602
27.5777	27.2058	28.0266	27.8476	27.6333	27.7437	27.8163	27.9411	25.5532	26.2976	26.1204	25.568	27.0292	27.6596	27.2781	26.9179	26.1807	27.4937	27.7157	26.1651	24.5871	23.1833	26.7662	26.7986	27.2339	27.7242	26.5734	cellular component assembly;cellular component assembly at cellular level;cellular component organization;cellular component organization at cellular level;cellular component organization or biogenesis;cellular component organization or biogenesis at cellular level;cellular process;cellular process involved in reproduction;endosome transport;establishment of localization;establishment of localiza…		cell part;cytoplasmic part;endosomal part;endosome membrane;ESCRT I complex;extracellular membrane-bounded organelle;extracellular organelle;extracellular region part;extracellular vesicular exosome;intracellular organelle part;intracellular part;late endosome membrane;macromolecular complex;membrane;membrane part;membrane-bounded organelle;membrane-bounded vesicle;organelle;organelle membrane;or…	Endocytosis	ACEVEDO_METHYLATED_IN_LIVER_CANCER_DN;BERTUCCI_MEDULLARY_VS_DUCTAL_BREAST_CANCER_DN;CHEMNITZ_RESPONSE_TO_PROSTAGLANDIN_E2_DN;chr7q11;CUI_TCF21_TARGETS_2_UP;ENGELMANN_CANCER_PROGENITORS_DN;GSE13738_RESTING_VS_BYSTANDER_ACTIVATED_CD4_TCELL_UP;GSE27786_LIN_NEG_VS_NKTCELL_DN;KEGG_ENDOCYTOSIS;PEREZ_TP53_TARGETS;REACTOME_ENDOSOMAL_SORTING_COMPLEX_REQUIRED_FOR_TRANSPORT_ESCRT;REACTOME_HIV_INFECTION;REAC…	REACTOME_ENDOSOMAL_SORTING_COMP_Yes	Completeproteome;Endosome;Membrane;Proteintransport;Referenceproteome;Transport;Williams-Beurensyndrome	+		+	Control vs CFNT;Control vs CFT		Vacuolar protein sorting-associated protein 37D	VPS37D	Q86XT2	Q86XT2	VP37D_HUMAN	13	5882400000	344	0.001726	0.0276559	1.05908
25.8757	25.5823	26.2454	26.0493	26.1314	25.7694	25.9247	26.3493	23.4403	23.8039	24.0836	23.7533	25.2989	26.3365	25.183	25.0774	25.4133	25.9813	25.5087	24.5717	17.6408	18.7463	24.6859	25.1106	24.7301	25.8352	24.6579	cellular macromolecule metabolic process;cellular metabolic process;cellular process;cellular protein metabolic process;macromolecule metabolic process;macromolecule modification;metabolic process;primary metabolic process;protein acylation;protein lipidation;protein metabolic process;protein modification process;protein palmitoylation	binding;catalytic activity;cation binding;DNA binding;ion binding;metal ion binding;nucleic acid binding;palmitoyltransferase activity;protein-cysteine S-acyltransferase activity;protein-cysteine S-palmitoleyltransferase activity;S-acyltransferase activity;transferase activity;transferase activity, transferring acyl groups;transferase activity, transferring acyl groups other than amino-acyl group…	cell part;cytoplasmic part;endoplasmic reticulum;extracellular membrane-bounded organelle;extracellular organelle;extracellular region part;extracellular vesicular exosome;integral to membrane;intracellular membrane-bounded organelle;intracellular organelle;intracellular part;intrinsic to membrane;membrane part;membrane-bounded organelle;membrane-bounded vesicle;organelle;vesicle		chr16q22;CTATGCA,MIR-153;CTCTATG,MIR-368;DODD_NASOPHARYNGEAL_CARCINOMA_UP;GCACTTT,MIR-17-5P,MIR-20A,MIR-106A,MIR-106B,MIR-20B,MIR-519D;GGGCGGR_V$SP1_Q6;GSE10463_CD40L_AND_VA347_VS_CD40L_IN_DC_DN;GTTGNYNNRGNAAC_UNKNOWN;LIM_MAMMARY_LUMINAL_MATURE_UP;PKCA_DN.V1_DN;TGCACTT,MIR-519C,MIR-519B,MIR-519A;TGCCAAR_V$NF1_Q6;V$GATA1_04;V$GATA1_05;V$HAND1E47_01	---	Acyltransferase;Completeproteome;Membrane;Metal-binding;Polymorphism;Referenceproteome;Transferase;Transmembrane;Transmembranehelix;Zinc;Zinc-finger	+		+	Control vs CFNT;Control vs CFT		Probable palmitoyltransferase ZDHHC1	ZDHHC1	Q8WTX9	Q8WTX9	ZDHC1_HUMAN	5	1671000000	149	0.00405077	0.0375207	1.11995
26.9413	27.0621	27.5322	27.506	27.383	27.1765	27.079	27.7958	25.7541	25.3606	25.8661	25.6387	26.6487	27.339	26.3448	26.4238	25.6741	27.1426	26.5421	25.4894	25.0389	23.9748	26.5629	26.5647	27.0011	26.8358	26.045	biological regulation;biosynthetic process;cellular biosynthetic process;cellular macromolecule biosynthetic process;cellular macromolecule metabolic process;cellular metabolic process;cellular nitrogen compound metabolic process;cellular process;cellular response to stimulus;macromolecule biosynthetic process;macromolecule metabolic process;metabolic process;negative regulation of biological pro…	binding;core promoter proximal region DNA binding;core promoter proximal region sequence-specific DNA binding;DNA binding;molecular transducer activity;nucleic acid binding;nucleic acid binding transcription factor activity;regulatory region DNA binding;regulatory region nucleic acid binding;RNA polymerase II core promoter proximal region sequence-specific DNA binding;RNA polymerase II core promo…	cell part;cytoplasm;cytoplasmic part;cytoskeletal part;extracellular membrane-bounded organelle;extracellular organelle;extracellular region part;extracellular vesicular exosome;intracellular membrane-bounded organelle;intracellular organelle;intracellular organelle part;intracellular part;membrane;membrane-bounded organelle;membrane-bounded vesicle;microtubule organizing center;nucleus;organelle…		AAGCACT,MIR-520F;AGCACTT,MIR-93,MIR-302A,MIR-302B,MIR-302C,MIR-302D,MIR-372,MIR-373,MIR-520E,MIR-520A,MIR-526B,MIR-520B,MIR-520C,MIR-520D;AMBROSINI_FLAVOPIRIDOL_TREATMENT_TP53;BONOME_OVARIAN_CANCER_SURVIVAL_SUBOPTIMAL_DEBULKING;CASORELLI_ACUTE_PROMYELOCYTIC_LEUKEMIA_DN;chr19p13;CSR_EARLY_UP.V1_DN;GACAATC,MIR-219;GCACTTT,MIR-17-5P,MIR-20A,MIR-106A,MIR-106B,MIR-20B,MIR-519D;GSE1460_NAIVE_CD4_TCELL_…	---	Alternativesplicing;Coiledcoil;Completeproteome;Cytoplasm;Cytoskeleton;DNA-binding;Mentalretardation;Nucleus;Phosphoprotein;Polymorphism;Referenceproteome;Repressor;Transcription;Transcriptionregulation	+		+	Control vs CFNT;Control vs CFT		Coiled-coil and C2 domain-containing protein 1A	CC2D1A	Q6P1N0	Q6P1N0	C2D1A_HUMAN	33	4072800000	572	0.000249942	0.0150588	1.12415
26.5728	26.3359	26.9902	26.9189	26.7774	26.7554	26.7722	27.0779	25.211	25.0763	24.4428	25.0141	25.5938	27.2454	25.8168	25.9328	25.3822	26.4114	26.2093	25.434	24.3784	23.8783	25.7295	25.5454	26.6305	27.0669	25.8339	aging;autophagic vacuole assembly;autophagy;biological regulation;catabolic process;cell aging;cellular catabolic process;cellular component assembly;cellular component assembly at cellular level;cellular component organization;cellular component organization at cellular level;cellular component organization or biogenesis;cellular component organization or biogenesis at cellular level;cellular ma…	adenyl nucleotide binding;adenyl ribonucleotide binding;ATP binding;binding;catalytic activity;kinase activity;nucleotide binding;phosphotransferase activity, alcohol group as acceptor;protein kinase activity;protein serine/threonine kinase activity;purine nucleotide binding;purine ribonucleoside triphosphate binding;purine ribonucleotide binding;ribonucleotide binding;transferase activity;transf…	Atg1p signaling complex;cell part;cytoplasm;cytoplasmic part;cytosol;intracellular part;macromolecular complex;membrane;pre-autophagosomal structure;protein complex	mTOR signaling pathway;Regulation of autophagy	CHARAFE_BREAST_CANCER_LUMINAL_VS_MESENCHYMAL_UP;chr15q24;CTCAGGG,MIR-125B,MIR-125A;FIRESTEIN_PROLIFERATION;GSE18791_CTRL_VS_NEWCASTLE_VIRUS_DC_12H_UP;GSE26669_CTRL_VS_COSTIM_BLOCK_MLR_CD4_TCELL_DN;KEGG_MTOR_SIGNALING_PATHWAY;KEGG_REGULATION_OF_AUTOPHAGY;OZEN_MIR125B1_TARGETS;RAAGNYNNCTTY_UNKNOWN;SENESE_HDAC3_TARGETS_DN;WIERENGA_STAT5A_TARGETS_DN	---	Alternativesplicing;ATP-binding;Autophagy;Completeproteome;Cytoplasm;Kinase;Nucleotide-binding;Phosphoprotein;Polymorphism;Referenceproteome;Repeat;Serine/threonine-proteinkinase;Transferase	+		+	Control vs CFNT;Control vs CFT		Serine/threonine-protein kinase ULK3	ULK3	Q6PHR2	Q6PHR2	ULK3_HUMAN	17	3437500000	358	0.000630172	0.0212245	1.1276
27.242	26.1211	26.3374	26.7071	27.2921	27.6113	26.5958	27.2042	27.5512	26.0144	24.4589	25.4623	24.7954	25.8065	26.3412	25.9709	24.5948	26.3315	25.6997	26.0901	26.6137	26.3126	24.7337	25.7822	26.3476	24.8667	25.5183	anatomical structure development;apoptosis;behavior;biological regulation;brain development;cell activation;cell death;cell development;cellular component organization;cellular component organization at cellular level;cellular component organization or biogenesis;cellular component organization or biogenesis at cellular level;cellular developmental process;cellular process;cellular process involv…	beta-amyloid binding;binding;cysteine-type endopeptidase inhibitor activity;endopeptidase inhibitor activity;endopeptidase regulator activity;enzyme binding;enzyme inhibitor activity;enzyme regulator activity;identical protein binding;peptidase inhibitor activity;peptidase regulator activity;protease binding;protein binding	axon;basement membrane;cell body;cell part;cell projection;contractile fiber;cytoplasmic part;endoplasmic reticulum;endosome;extracellular matrix part;extracellular membrane-bounded organelle;extracellular organelle;extracellular region;extracellular region part;extracellular space;extracellular vesicular exosome;intracellular membrane-bounded organelle;intracellular non-membrane-bounded organell…	Salivary secretion	ACEVEDO_METHYLATED_IN_LIVER_CANCER_DN;BYSTRYKH_HEMATOPOIESIS_STEM_CELL_QTL_CIS;CHANG_CORE_SERUM_RESPONSE_DN;CHANG_POU5F1_TARGETS_DN;chr20p11;DELACROIX_RAR_BOUND_ES;ENZYME_INHIBITOR_ACTIVITY;ENZYME_REGULATOR_ACTIVITY;GOLDRATH_ANTIGEN_RESPONSE;GOLUB_ALL_VS_AML_DN;GSE10325_LUPUS_BCELL_VS_LUPUS_MYELOID_DN;GSE10325_LUPUS_CD4_TCELL_VS_LUPUS_MYELOID_DN;GSE12366_PLASMA_CELL_VS_MEMORY_BCELL_UP;GSE12366_PL…	---	3D-structure;Age-relatedmaculardegeneration;Amyloid;Amyloidosis;Completeproteome;Directproteinsequencing;Diseasemutation;Disulfidebond;Glycoprotein;Polymorphism;Proteaseinhibitor;Referenceproteome;Secreted;Signal;Thiolproteaseinhibitor	+		+	Control vs CFNT;Control vs CFT		Cystatin-C	CST3	P01034	P01034	CYTC_HUMAN	5	3515200000	267	0.00394171	0.0361	1.12913
26.1059	25.8787	26.426	26.6391	26.3895	26.4721	25.7773	26.6209	24.6524	24.5042	23.4212	24.805	26.0168	26.7557	25.1456	24.9983	24.6938	26.2667	25.717	24.7934	22.962	23.8615	25.5956	25.2564	25.9925	25.868	25.2962	biological regulation;biosynthetic process;cellular biosynthetic process;cellular component organization;cellular component organization or biogenesis;cellular macromolecule biosynthetic process;cellular macromolecule metabolic process;cellular metabolic process;cellular nitrogen compound metabolic process;cellular process;endosome transport;establishment of localization;establishment of localiza…	binding;lipid binding;phosphatidylinositol binding;phosphatidylinositol-3-phosphate binding;phospholipid binding;protein binding;protein C-terminus binding;small conjugating protein binding;ubiquitin binding	cell part;cytoplasmic part;cytosol;endosomal part;endosome;endosome membrane;extracellular membrane-bounded organelle;extracellular organelle;extracellular region part;extracellular vesicular exosome;intracellular membrane-bounded organelle;intracellular organelle;intracellular organelle part;intracellular part;late endosome membrane;lysosome;lytic vacuole;membrane;membrane-bounded organelle;memb…	Endocytosis	ACTGCAG,MIR-17-3P;BRUINS_UVC_RESPONSE_LATE;CHANDRAN_METASTASIS_DN;chr13q14;DOUGLAS_BMI1_TARGETS_DN;GABRIELY_MIR21_TARGETS;GSE18791_CTRL_VS_NEWCASTLE_VIRUS_DC_16H_UP;GSE19825_NAIVE_VS_IL2RALOW_DAY3_EFF_CD8_TCELL_DN;GSE29615_CTRL_VS_DAY3_LAIV_IFLU_VACCINE_PBMC_DN;GSE30962_PRIMARY_VS_SECONDARY_CHRONIC_LCMV_INF_CD8_TCELL_UP;GSE31082_DP_VS_CD4_SP_THYMOCYTE_UP;GSE34205_HEALTHY_VS_FLU_INF_INFANT_PBMC_UP…	REACTOME_ENDOSOMAL_SORTING_COMP_Yes	3D-structure;Alternativesplicing;Coiledcoil;Completeproteome;Cytoplasm;Endosome;Lipid-binding;Membrane;Nucleus;Proteintransport;Referenceproteome;Transcription;Transcriptionregulation;Transport	+		+	Control vs CFNT;Control vs CFT		Vacuolar protein-sorting-associated protein 36	VPS36	Q86VN1	Q86VN1	VPS36_HUMAN	18	2351600000	231	0.0032589	0.0335185	1.14118
21.2839	21.3828	21.5596	21.4048	21.3446	21.3084	21.3223	21.7882	19.5876	21.0336	20.1177	19.9029	20.0431	21.9563	20.1546	18.905	21.0565	20.2818	20.4593	19.3142	19.1357	18.9713	19.0766	19.218	21.5136	17.9206	19.4569	acylglycerol catabolic process;acylglycerol metabolic process;arachidonic acid metabolic process;biological regulation;biosynthetic process;blood coagulation;carboxylic acid biosynthetic process;carboxylic acid metabolic process;catabolic process;cell activation;cellular biosynthetic process;cellular catabolic process;cellular ketone metabolic process;cellular lipid catabolic process;cellular lip…	acylglycerol lipase activity;binding;carboxylic ester hydrolase activity;catalytic activity;hydrolase activity;hydrolase activity, acting on ester bonds;identical protein binding;lipase activity;lipid binding;lysophospholipase activity;phospholipase activity;protein binding;protein dimerization activity;protein homodimerization activity	axon part;cell part;cell projection part;cytoplasmic part;cytosol;endoplasmic reticulum membrane;endoplasmic reticulum part;extrinsic to membrane;intracellular organelle part;intracellular part;membrane;membrane part;nuclear part;nucleoplasm;organelle membrane;organelle part;plasma membrane;synapse;varicosity	Glycerolipid metabolism	AAANWWTGC_UNKNOWN;AAAYWAACM_V$HFH4_01;AACTTT_UNKNOWN;ACEVEDO_FGFR1_TARGETS_IN_PROSTATE_CANCER_MODEL_DN;ACTTTAT,MIR-142-5P;ALFANO_MYC_TARGETS;BEIER_GLIOMA_STEM_CELL_DN;BENPORATH_SUZ12_TARGETS;BLALOCK_ALZHEIMERS_DISEASE_DN;BLALOCK_ALZHEIMERS_DISEASE_INCIPIENT_DN;BMI1_DN_MEL18_DN.V1_UP;BROWNE_HCMV_INFECTION_20HR_DN;BURTON_ADIPOGENESIS_6;CAGCTG_V$AP4_Q5;CAGGTA_V$AREB6_01;CAIRO_HEPATOBLASTOMA_DN;CARBO…	---	3D-structure;Alternativesplicing;Completeproteome;Cytoplasm;Fattyacidbiosynthesis;Fattyacidmetabolism;Hydrolase;Lipidbiosynthesis;Lipiddegradation;Lipidmetabolism;Membrane;Nitration;Referenceproteome;Serineesterase	+		+	Control vs CFNT;Control vs CFT	+	Monoglyceride lipase	MGLL	Q99685	Q99685	MGLL_HUMAN	3	58202000	8	0.000883364	0.0215714	1.18995
25.8774	25.8611	26.364	26.6745	26.4512	26.5306	26.1902	26.5848	24.6776	24.6891	23.3704	24.4187	25.4617	26.613	25.6272	25.7406	24.9921	26.0871	25.43	24.3244	23.9341	23.7111	25.6187	25.2861	25.6685	26.5603	24.898	apoptosis;biological regulation;cell cycle;cell death;cellular component assembly;cellular component assembly at cellular level;cellular component organization;cellular component organization at cellular level;cellular component organization or biogenesis;cellular component organization or biogenesis at cellular level;cellular macromolecular complex assembly;cellular macromolecular complex subuni…	alcohol binding;amine binding;binding;cation binding;identical protein binding;ion binding;lipid binding;phosphatidylcholine binding;phospholipid binding;protein binding;protein dimerization activity;protein homodimerization activity;quaternary ammonium group binding	cell part;cytoplasmic membrane-bounded vesicle;cytoplasmic part;cytoplasmic vesicle;cytosol;endosomal part;endosome membrane;ESCRT III complex;extracellular membrane-bounded organelle;extracellular organelle;extracellular region part;extracellular vesicular exosome;intracellular membrane-bounded organelle;intracellular organelle;intracellular organelle part;intracellular part;late endosome membra…	Endocytosis	BERTUCCI_MEDULLARY_VS_DUCTAL_BREAST_CANCER_DN;BRUINS_UVC_RESPONSE_VIA_TP53_GROUP_B;chr2p24;CREIGHTON_ENDOCRINE_THERAPY_RESISTANCE_5;DODD_NASOPHARYNGEAL_CARCINOMA_UP;FORTSCHEGGER_PHF8_TARGETS_DN;GGGCGGR_V$SP1_Q6;GSE13229_IMM_VS_MATURE_NKCELL_DN;GSE13738_RESTING_VS_BYSTANDER_ACTIVATED_CD4_TCELL_UP;GSE15930_NAIVE_VS_72H_IN_VITRO_STIM_IL12_CD8_TCELL_UP;GSE17721_0.5H_VS_4H_POLYIC_BMDM_DN;GSE17721_ALL_…	REACTOME_ENDOSOMAL_SORTING_COMP_Yes	3D-structure;Alternativesplicing;Apoptosis;Cellcycle;Celldivision;Coiledcoil;Completeproteome;Cytoplasm;Endosome;Isopeptidebond;Lipoprotein;Membrane;Myristate;Phosphoprotein;Proteintransport;Referenceproteome;Transport;Ublconjugation	+		+	Control vs CFNT;Control vs CFT		Charged multivesicular body protein 3	CHMP3	Q9Y3E7	Q9Y3E7	CHMP3_HUMAN	7	2295200000	143	0.00182158	0.024619	1.1974
28.8809	28.4032	29.2708	28.8237	29.7234	28.7112	28.0909	29.3493	27.1327	26.1092	27.978	28.2138	28.6305	28.5925	28.2828	27.6639	27.4871	28.3598	27.9477	25.9842	28.0462	25.0181	28.6859	27.3348	27.9844	27.6398	27.9628		adenyl nucleotide binding;adenyl ribonucleotide binding;ATP binding;binding;endopeptidase inhibitor activity;endopeptidase regulator activity;enzyme binding;enzyme inhibitor activity;enzyme regulator activity;kinase binding;lipid binding;nucleotide binding;peptidase inhibitor activity;peptidase regulator activity;phosphatidylethanolamine binding;phospholipid binding;protein binding;protein kinase…	cell part;cytoplasm;extracellular membrane-bounded organelle;extracellular organelle;extracellular region part;extracellular vesicular exosome;intracellular membrane-bounded organelle;intracellular organelle;intracellular part;membrane-bounded organelle;membrane-bounded vesicle;nucleus;organelle;vesicle		ACOSTA_PROLIFERATION_INDEPENDENT_MYC_TARGETS_UP;BLALOCK_ALZHEIMERS_DISEASE_UP;CAIRO_HEPATOBLASTOMA_CLASSES_DN;chr12q24;CONCANNON_APOPTOSIS_BY_EPOXOMICIN_DN;DAIRKEE_TERT_TARGETS_UP;DAVICIONI_MOLECULAR_ARMS_VS_ERMS_UP;DIAZ_CHRONIC_MEYLOGENOUS_LEUKEMIA_UP;FLECHNER_BIOPSY_KIDNEY_TRANSPLANT_REJECTED_VS_OK_DN;GRUETZMANN_PANCREATIC_CANCER_DN;GSE10325_LUPUS_BCELL_VS_LUPUS_MYELOID_UP;GSE10325_LUPUS_CD4_TC…	---	3D-structure;ATP-binding;Completeproteome;Cytoplasm;Directproteinsequencing;Disulfidebond;Lipid-binding;Nucleotide-binding;Phosphoprotein;Proteaseinhibitor;Referenceproteome;Serineproteaseinhibitor	+		+	Control vs CFNT;Control vs CFT		Phosphatidylethanolamine-binding protein 1;Hippocampal cholinergic neurostimulating peptide	PEBP1	P30086	P30086	PEBP1_HUMAN	14	12718000000	678	0.0029063	0.02972	1.20816
30.9133	29.0254	28.5203	29.6511	29.5312	30.0637	30.9562	29.0768	28.8908	28.3947	27.8329	28.0704	28.0079	28.2814	28.5105	27.7376	28.1389	29.2744	28.419	28.3793	28.0712	29.015	27.5353	28.8765	28.2397	27.8385	27.3886	actin cytoskeleton organization;actin filament capping;actin filament organization;actin filament polymerization;actin filament severing;actin filament-based process;actin nucleation;actin polymerization or depolymerization;aging;anatomical structure development;anatomical structure morphogenesis;apoptosis;barbed-end actin filament capping;biological regulation;cell death;cell development;cell pa…	actin binding;binding;calcium ion binding;cation binding;cytoskeletal protein binding;ion binding;metal ion binding;myosin binding;myosin II binding;protein binding;protein domain specific binding	actin cap;actin cytoskeleton;adherens junction;anchoring junction;blood microparticle;cell cortex part;cell junction;cell part;cell projection;cell-substrate adherens junction;cell-substrate junction;cortical actin cytoskeleton;cortical cytoskeleton;cytoplasm;cytoplasmic part;cytoskeletal part;cytoskeleton;cytosol;extracellular membrane-bounded organelle;extracellular organelle;extracellular regi…	Fc gamma R-mediated phagocytosis;Regulation of actin cytoskeleton	ACEVEDO_FGFR1_TARGETS_IN_PROSTATE_CANCER_MODEL_DN;ACTIN_CYTOSKELETON;ACTIN_CYTOSKELETON_ORGANIZATION_AND_BIOGENESIS;ACTIN_FILAMENT_BASED_PROCESS;ACTIN_FILAMENT_POLYMERIZATION;ACTIN_POLYMERIZATION_AND_OR_DEPOLYMERIZATION;ALCALAY_AML_BY_NPM1_LOCALIZATION_DN;ALFANO_MYC_TARGETS;BAE_BRCA1_TARGETS_UP;BENPORATH_ES_WITH_H3K27ME3;BERENJENO_TRANSFORMED_BY_RHOA_DN;BIOCARTA_ECM_PATHWAY;BIOCARTA_HIVNEF_PATHWA…	---	3D-structure;Acetylation;Actin-binding;Actincapping;Alternativeinitiation;Alternativesplicing;Amyloid;Amyloidosis;Calcium;Ciliumbiogenesis/degradation;Completeproteome;Cornealdystrophy;Cytoplasm;Cytoskeleton;Directproteinsequencing;Diseasemutation;Disulfidebond;Metal-binding;Phosphoprotein;Polymorphism;Referenceproteome;Repeat;Secreted;Signal	+		+	Control vs CFNT;Control vs CFT	+	Gelsolin	GSN	P06396	P06396	GELS_HUMAN	33	23983000000	1213	0.000173679	0.0115556	1.3891
25.102	25.491	25.7354	25.9889	25.3807	25.04	25.5545	25.7099	23.7075	23.5857	23.1397	23.8121	23.3342	25.9345	24.4668	24.3126	23.6639	24.6367	25.0408	23.6361	22.0022	19.6339	24.0362	24.5031	24.8658	23.646	25.1588	biological regulation;biosynthetic process;cellular biosynthetic process;cellular component organization;cellular component organization or biogenesis;cellular macromolecule biosynthetic process;cellular macromolecule metabolic process;cellular metabolic process;cellular nitrogen compound metabolic process;cellular process;endosome transport;endosome transport via multivesicular body sorting path…	binding;identical protein binding;protein binding;protein dimerization activity;protein homodimerization activity;protein N-terminus binding;structural molecule activity	cell part;cytoplasm;cytoplasmic part;cytosol;endosomal part;endosome membrane;ESCRT II complex;extracellular membrane-bounded organelle;extracellular organelle;extracellular region part;extracellular vesicular exosome;intracellular membrane-bounded organelle;intracellular non-membrane-bounded organelle;intracellular organelle;intracellular organelle part;intracellular part;macromolecular complex;…	Endocytosis	ACEVEDO_LIVER_CANCER_UP;ACEVEDO_LIVER_TUMOR_VS_NORMAL_ADJACENT_TISSUE_UP;BENPORATH_CYCLING_GENES;CASTELLANO_NRAS_TARGETS_UP;chr17q21;GGGAGGRR_V$MAZ_Q6;GSE10239_MEMORY_VS_DAY4.5_EFF_CD8_TCELL_UP;GSE13493_DP_VS_CD8POS_THYMOCYTE_DN;GSE17974_CTRL_VS_ACT_IL4_AND_ANTI_IL12_24H_CD4_TCELL_DN;GSE7460_CTRL_VS_TGFB_TREATED_ACT_FOXP3_MUT_TCONV_DN;GSE9650_EXHAUSTED_VS_MEMORY_CD8_TCELL_DN;GSE9650_GP33_VS_GP276…	REACTOME_ENDOSOMAL_SORTING_COMP_Yes	3D-structure;Completeproteome;Cytoplasm;Endosome;Membrane;Nucleus;Polymorphism;Proteintransport;Referenceproteome;Transcription;Transcriptionregulation;Transport	+		+	Control vs CFNT;Control vs CFT		Vacuolar protein-sorting-associated protein 25	VPS25	Q9BRG1	Q9BRG1	VPS25_HUMAN	12	1215900000	189	0.000211102	0.0116364	1.39442
28.7555	28.805	29.3839	28.9655	29.3201	29.2425	28.5861	29.5095	27.0156	26.4699	27.958	26.874	27.5941	29.0045	27.7825	27.9564	27.2912	28.9966	27.4737	26.6713	27.1746	24.4251	27.9625	27.8162	28.2862	28.8191	28.0048	actin cytoskeleton organization;actin filament-based process;anatomical structure homeostasis;biological regulation;cell cycle process;cellular component organization;cellular component organization at cellular level;cellular component organization or biogenesis;cellular component organization or biogenesis at cellular level;cellular homeostasis;cellular process;cellular response to stimulus;cogn…	actin binding;actin filament binding;binding;cytoskeletal protein binding;protein binding;protein domain specific binding	actin cytoskeleton;cell part;cytoplasm;cytoplasmic part;cytoskeleton;cytosol;endosomal part;endosome membrane;ESCRT III complex;extracellular membrane-bounded organelle;extracellular organelle;extracellular region part;extracellular vesicular exosome;intracellular;intracellular membrane-bounded organelle;intracellular non-membrane-bounded organelle;intracellular organelle;intracellular organelle …	Endocytosis	AACATTC,MIR-409-3P;ACAWYAAAG_UNKNOWN;ACEVEDO_LIVER_CANCER_UP;ALCALAY_AML_BY_NPM1_LOCALIZATION_DN;ATTACAT,MIR-380-3P;BMI1_DN.V1_DN;CAGGTG_V$E12_Q6;CAGNYGKNAAA_UNKNOWN;chr3p12;chr9q22;CREIGHTON_ENDOCRINE_THERAPY_RESISTANCE_3;CREIGHTON_ENDOCRINE_THERAPY_RESISTANCE_5;CTCAGGG,MIR-125B,MIR-125A;CTGRYYYNATT_UNKNOWN;CTTTGT_V$LEF1_Q2;DUTERTRE_ESTRADIOL_RESPONSE_24HR_DN;ENGELMANN_CANCER_PROGENITORS_DN;ESC_…	REACTOME_ENDOSOMAL_SORTING_COMP_Yes	3D-structure;Acetylation;Actin-binding;Alternativesplicing;Amyotrophiclateralsclerosis;Coiledcoil;Completeproteome;Cytoplasm;Diseasemutation;Endosome;Membrane;Neurodegeneration;Phosphoprotein;Polymorphism;Proteintransport;Referenceproteome;Repeat;Transport;WDrepeat	+		+	Control vs CFNT;Control vs CFT		Charged multivesicular body protein 2b	CHMP2B	Q9UQN3;Q92828	Q9UQN3	CHM2B_HUMAN	11	13138000000	339	0.000135367	0.0104	1.48036
25.9573	24.1691	24.5536	25.2619	26.5278	25.2295	24.5184	26.0406	23.1965	23.1445	24.1073	23.1181	25.9215	24.6872	23.8691	24.0126	22.8364	24.0687	24.6249	21.8219	24.3189	22.9241	24.2982	22.9374	23.5925	25.0166	23.3407	biological regulation;cellular metabolic process;cellular process;energy derivation by oxidation of organic compounds;energy reserve metabolic process;generation of precursor metabolites and energy;metabolic process;oxidation-reduction process;regulation of biological process;regulation of cell communication;regulation of cellular localization;regulation of cellular process;regulation of hormone …	actin binding;actin filament binding;binding;calmodulin binding;cytoskeletal protein binding;protein binding	actin cytoskeleton;adherens junction;anchoring junction;cell cortex;cell junction;cell part;cell-substrate adherens junction;cell-substrate junction;centrosome;cytoplasmic part;cytoskeletal part;cytoskeleton;extracellular membrane-bounded organelle;extracellular organelle;extracellular region part;extracellular vesicular exosome;female germ cell nucleus;focal adhesion;germ cell nucleus;germinal v…	Fc gamma R-mediated phagocytosis	AAGCACA,MIR-218;AATGTGA,MIR-23A,MIR-23B;ACACTAC,MIR-142-3P;ACEVEDO_LIVER_CANCER_UP;ACEVEDO_LIVER_TUMOR_VS_NORMAL_ADJACENT_TISSUE_UP;ACEVEDO_NORMAL_TISSUE_ADJACENT_TO_LIVER_TUMOR_UP;ACTGCAG,MIR-17-3P;ACTGTGA,MIR-27A,MIR-27B;ACTIN_BINDING;ACTIN_CYTOSKELETON;ACTIN_FILAMENT_BINDING;AGTCTTA,MIR-499;ALFANO_MYC_TARGETS;ATACTGT,MIR-144;ATAGGAA,MIR-202;ATGAAGG,MIR-205;BAE_BRCA1_TARGETS_UP;BERENJENO_TRANSF…	---	Actin-binding;Calmodulin-binding;Completeproteome;Cytoplasm;Cytoskeleton;Lipoprotein;Membrane;Myristate;Phosphoprotein;Polymorphism;Referenceproteome	+		+	Control vs CFNT;Control vs CFT		Myristoylated alanine-rich C-kinase substrate	MARCKS	P29966	P29966	MARCS_HUMAN	11	943560000	120	0.00351917	0.0275111	1.49822
27.2616	25.2011	24.9588	25.7845	25.2909	26.0177	27.3863	26.2774	22.9653	23.6963	25.0599	24.4684	23.5023	23.6875	24.9965	24.7617	24.6381	25.1752	24.9977	25.2313	23.6598	20.4013	26.1617	23.425	24.8662	23.4837	24.0774	biological adhesion;biological regulation;cell adhesion;cell-cell adhesion;cellular process;homophilic cell adhesion;negative regulation of biological process;negative regulation of cell growth;negative regulation of cellular process;negative regulation of growth;regulation of biological process;regulation of cell growth;regulation of cellular component organization;regulation of cellular process…	binding;calcium ion binding;cation binding;ion binding;metal ion binding	apical plasma membrane;brush border;cell junction;cell part;cell projection;extracellular membrane-bounded organelle;extracellular organelle;extracellular region part;extracellular vesicular exosome;integral to membrane;intrinsic to membrane;membrane part;membrane-bounded organelle;membrane-bounded vesicle;organelle;plasma membrane part;vesicle		ACEVEDO_LIVER_TUMOR_VS_NORMAL_ADJACENT_TISSUE_DN;ACEVEDO_METHYLATED_IN_LIVER_CANCER_DN;ACEVEDO_NORMAL_TISSUE_ADJACENT_TO_LIVER_TUMOR_UP;BREDEMEYER_RAG_SIGNALING_NOT_VIA_ATM_UP;chr5q35;GROWTH;GSE13485_PRE_VS_POST_YF17D_VACCINATION_PBMC_UP;GSE18148_CBFB_KO_VS_WT_TREG_UP;GSE22886_IL2_VS_IL15_STIM_NKCELL_DN;GSE22886_TH1_VS_TH2_48H_ACT_UP;GSE7460_CTRL_VS_TGFB_TREATED_ACT_CD8_TCELL_DN;INTEGRAL_TO_MEMBR…	---	Calcium;Celladhesion;Celljunction;Cellmembrane;Completeproteome;Glycoprotein;Membrane;Phosphoprotein;Polymorphism;Referenceproteome;Repeat;Signal;Transmembrane;Transmembranehelix	+		+	Control vs CFNT;Control vs CFT	+	Cadherin-related family member 2	CDHR2	Q9BYE9	Q9BYE9	CDHR2_HUMAN	20	1657600000	244	0.000528987	0.0133333	1.5906
25.0214	24.6655	25.957	25.3107	24.8776	26.3373	24.5459	24.5988	25.1189	23.4936	22.4016	24.2304	21.4711	25.0288	22.9314	22.5495	23.9887	24.9516	23.2939	22.892	23.6482	23.9146	24.3108	25.187	23.7345	23.6861	21.6519	amine metabolic process;aminoglycan biosynthetic process;aminoglycan catabolic process;aminoglycan metabolic process;anatomical structure morphogenesis;biological regulation;biosynthetic process;carbohydrate biosynthetic process;carbohydrate catabolic process;carbohydrate metabolic process;catabolic process;cell migration;cell motility;cell proliferation;cellular component movement;cellular lipid…		anchored to membrane;cell part;cytoplasmic part;external side of plasma membrane;extracellular matrix;extracellular membrane-bounded organelle;extracellular organelle;extracellular region part;extracellular space;extracellular vesicular exosome;Golgi apparatus part;Golgi lumen;integral to membrane;integral to plasma membrane;intracellular membrane-bounded organelle;intracellular organelle;intrace…		AAANWWTGC_UNKNOWN;AACTTT_UNKNOWN;AATGTGA,MIR-23A,MIR-23B;ACAWNRNSRCGG_UNKNOWN;ACAWYAAAG_UNKNOWN;ACEVEDO_LIVER_CANCER_WITH_H3K27ME3_DN;ANATOMICAL_STRUCTURE_DEVELOPMENT;ANATOMICAL_STRUCTURE_MORPHOGENESIS;ATGCTGC,MIR-103,MIR-107;ATGTACA,MIR-493;ATGTTAA,MIR-302C;BENPORATH_ES_1;BENPORATH_NANOG_TARGETS;BENPORATH_SOX2_TARGETS;BENPORATH_SUZ12_TARGETS;BERENJENO_TRANSFORMED_BY_RHOA_DN;BLALOCK_ALZHEIMERS_DI…	---	Alternativesplicing;Cellmembrane;Completeproteome;Dwarfism;Glycoprotein;GPI-anchor;Heparansulfate;Lipoprotein;Membrane;Phosphoprotein;Polymorphism;Proteoglycan;Referenceproteome;Secreted;Signal	+		+	Control vs CFNT;Control vs CFT		Glypican-4;Secreted glypican-4	GPC4	O75487;Q9Y625	O75487	GPC4_HUMAN	12	968880000	112	0.00206903	0.0227797	1.63498
30.9782	28.8582	30.4377	31.6826	30.7938	31.4864	31.9269	30.1998	30.3954	30.4863	26.3117	28.0499	28.0074	29.3058	27.6915	30.8845	28.9497	30.3985	29.757	29.3448	30.1901	25.1309	29.0696	29.2838	29.9187	27.9677	28.9574	anatomical structure formation involved in morphogenesis;angiogenesis;biological adhesion;biological regulation;cell adhesion;cell differentiation;cellular component disassembly;cellular component disassembly at cellular level;cellular component organization;cellular component organization at cellular level;cellular component organization or biogenesis;cellular component organization or biogenesi…	extracellular matrix structural constituent;structural molecule activity	cell part;collagen;collagen type XV;cytoplasmic part;endoplasmic reticulum lumen;endoplasmic reticulum part;extracellular matrix part;extracellular membrane-bounded organelle;extracellular organelle;extracellular region;extracellular region part;extracellular space;extracellular vesicular exosome;integral to membrane;intracellular organelle lumen;intracellular organelle part;intracellular part;in…	Protein digestion and absorption	ACCAAAG,MIR-9;AFFAR_YY1_TARGETS_DN;AMBROSINI_FLAVOPIRIDOL_TREATMENT_TP53;ATACCTC,MIR-202;ATF2_S_UP.V1_DN;BONOME_OVARIAN_CANCER_SURVIVAL_SUBOPTIMAL_DEBULKING;BOQUEST_STEM_CELL_CULTURED_VS_FRESH_UP;BURTON_ADIPOGENESIS_6;CAIRO_HEPATOBLASTOMA_UP;CATGTAA,MIR-496;CHICAS_RB1_TARGETS_CONFLUENT;chr9q21;COLLAGEN;CTTTGA_V$LEF1_Q2;CTTTGT_V$LEF1_Q2;DODD_NASOPHARYNGEAL_CARCINOMA_DN;EXTRACELLULAR_MATRIX;EXTRACE…	NABA_CORE_MATRISOME_Yes	3D-structure;Angiogenesis;Celladhesion;Collagen;Completeproteome;Developmentalprotein;Differentiation;Directproteinsequencing;Disulfidebond;Extracellularmatrix;Glycoprotein;Hydroxylation;Polymorphism;Referenceproteome;Repeat;Secreted;Signal	+		+	Control vs CFNT;Control vs CFT		Collagen alpha-1(XV) chain;Restin;Restin-2;Restin-3;Restin-4	COL15A1	P39059	P39059	COFA1_HUMAN	11	50458000000	1292	0.00897752	0.0417538	1.66358
28.7184	29.6498	28.4507	28.4022	27.061	28.598	28.7557	27.0668	27.1635	28.1547	25.83	27.7549	22.6505	26.6905	27.7187	27.0288	25.9974	26.967	26.2152	27.8108	25.051	25.4051	25.4758	29.1552	26.485	25.9291	26.128	activation of MAPK activity;anatomical structure development;anatomical structure formation involved in morphogenesis;anatomical structure morphogenesis;angiogenesis;behavior;behavioral response to pain;biological adhesion;biological regulation;blood coagulation;carbohydrate metabolic process;cartilage development;cartilage development involved in endochondral bone morphogenesis;cell activation;c…	binding;calcium ion binding;carbohydrate binding;cation binding;collagen binding;collagen V binding;cytokine binding;extracellular matrix binding;fibrinogen binding;fibroblast growth factor binding;fibronectin binding;glycoprotein binding;glycosaminoglycan binding;growth factor binding;heparin binding;identical protein binding;integrin binding;ion binding;laminin binding;lipid binding;lipoprotein…	basement membrane;cell part;cell surface;cytoplasmic membrane-bounded vesicle;cytoplasmic membrane-bounded vesicle lumen;cytoplasmic part;cytoplasmic vesicle;cytoplasmic vesicle part;endoplasmic reticulum;endoplasmic reticulum lumen;endoplasmic reticulum part;external side of plasma membrane;extracellular matrix;extracellular matrix part;extracellular membrane-bounded organelle;extracellular orga…	ECM-receptor interaction;Focal adhesion;Malaria;Phagosome;TGF-beta signaling pathway	AAANWWTGC_UNKNOWN;AACTTT_UNKNOWN;ACEVEDO_FGFR1_TARGETS_IN_PROSTATE_CANCER_MODEL_UP;AFFAR_YY1_TARGETS_DN;ALTEMEIER_RESPONSE_TO_LPS_WITH_MECHANICAL_VENTILATION;AMIT_EGF_RESPONSE_20_MCF10A;AMIT_EGF_RESPONSE_240_HELA;AMIT_EGF_RESPONSE_40_MCF10A;AMIT_SERUM_RESPONSE_240_MCF10A;AMIT_SERUM_RESPONSE_40_MCF10A;ANASTASSIOU_CANCER_MESENCHYMAL_TRANSITION_SIGNATURE;AZARE_NEOPLASTIC_TRANSFORMATION_BY_STAT3_DN;A…	NABA_CORE_MATRISOME_Yes	3D-structure;Alternativesplicing;Calcium;Celladhesion;Completeproteome;Disulfidebond;EGF-likedomain;Endoplasmicreticulum;Glycoprotein;Heparin-binding;Polymorphism;Referenceproteome;Repeat;Sarcoplasmicreticulum;Signal;Unfoldedproteinresponse	+		+	Control vs CFNT;Control vs CFT		Thrombospondin-1	THBS1	P07996;P35442	P07996	TSP1_HUMAN	34	9552500000	797	0.0099578	0.0440294	1.67266
22.031	21.3698	22.1014	22.1883	23.0591	21.8682	21.4918	23.137	20.2363	21.7767	19.2881	22.9524	22.4798	19.4267	22.2571	18.9662	19.5988	19.3369	20.1049	19.1587	18.7857	19.0893	19.3263	19.05	18.7871	19.0952	18.6386	biological regulation;cation homeostasis;cellular cation homeostasis;cellular chemical homeostasis;cellular component organization;cellular component organization at cellular level;cellular component organization or biogenesis;cellular component organization or biogenesis at cellular level;cellular homeostasis;cellular ion homeostasis;cellular monovalent inorganic cation homeostasis;cellular proc…	binding;catalytic activity;GTP binding;GTPase activity;guanyl nucleotide binding;guanyl ribonucleotide binding;hydrolase activity;hydrolase activity, acting on acid anhydrides;hydrolase activity, acting on acid anhydrides, in phosphorus-containing anhydrides;nucleoside-triphosphatase activity;nucleotide binding;purine nucleotide binding;purine ribonucleoside triphosphate binding;purine ribonucleo…	cell part;cytoplasmic membrane-bounded vesicle;cytoplasmic part;cytoplasmic vesicle;cytoplasmic vesicle membrane;cytoplasmic vesicle part;early endosome;endocytic vesicle;endocytic vesicle membrane;endosome;Golgi apparatus;intracellular membrane-bounded organelle;intracellular organelle;intracellular organelle part;intracellular part;membrane;membrane-bounded organelle;membrane-bounded vesicle;or…		ALTEMEIER_RESPONSE_TO_LPS_WITH_MECHANICAL_VENTILATION;BOYLAN_MULTIPLE_MYELOMA_C_CLUSTER_DN;BOYLAN_MULTIPLE_MYELOMA_C_DN;BOYLAN_MULTIPLE_MYELOMA_PCA3_UP;BRUINS_UVC_RESPONSE_LATE;CERVERA_SDHB_TARGETS_1_UP;chr13q34;CREIGHTON_ENDOCRINE_THERAPY_RESISTANCE_5;DELACROIX_RAR_BOUND_ES;DING_LUNG_CANCER_EXPRESSION_BY_COPY_NUMBER;FEVR_CTNNB1_TARGETS_UP;FOSTER_TOLERANT_MACROPHAGE_UP;GAZDA_DIAMOND_BLACKFAN_ANEM…	---	Completeproteome;Cytoplasmicvesicle;Golgiapparatus;GTP-binding;Lipoprotein;Membrane;Nucleotide-binding;Polymorphism;Prenylation;Proteintransport;Referenceproteome;Transport	+		+	Control vs CFNT;Control vs CFT	+	Ras-related protein Rab-20	RAB20	Q9NX57	Q9NX57	RAB20_HUMAN	6	101980000	20	0.00706042	0.0352069	1.69061
23.5617	21.9447	21.3384	21.8963	21.5525	21.2869	22.3732	21.5502	20.3164	20.0711	18.5355	19.4074	19.435	21.7225	21.2233	21.8145	19.301	21.7878	20.3237	18.9838	21.7435	19.5958	19.3548	18.7454	21.5268	19.2351	20.5353	amine metabolic process;biological adhesion;cation transport;cell adhesion;cellular process;defense response;establishment of localization;inflammatory response;ion transport;metabolic process;nitrogen compound metabolic process;response to antibiotic;response to chemical stimulus;response to stimulus;response to stress;response to wounding;transport	aliphatic-amine oxidase activity;aminoacetone:oxygen oxidoreductase(deaminating) activity;binding;calcium ion binding;catalytic activity;cation binding;cation channel activity;cation transmembrane transporter activity;channel activity;cofactor binding;copper ion binding;identical protein binding;ion binding;ion channel activity;ion transmembrane transporter activity;metal ion binding;oxidoreducta…	cell part;cell projection;cell surface;cytoplasm;cytoplasmic part;early endosome;endoplasmic reticulum;endosome;Golgi apparatus;integral to membrane;intracellular membrane-bounded organelle;intracellular organelle;intracellular part;intrinsic to membrane;membrane;membrane part;membrane-bounded organelle;microvillus;organelle;plasma membrane	beta-Alanine metabolism;Glycine, serine and threonine metabolism;Isoquinoline alkaloid biosynthesis;Phenylalanine metabolism;Tropane, piperidine and pyridine alkaloid biosynthesis;Tyrosine metabolism	AMINE_METABOLIC_PROCESS;BENPORATH_CYCLING_GENES;BERENJENO_TRANSFORMED_BY_RHOA_DN;BERTUCCI_MEDULLARY_VS_DUCTAL_BREAST_CANCER_DN;BOQUEST_STEM_CELL_CULTURED_VS_FRESH_UP;BURTON_ADIPOGENESIS_6;CATION_BINDING;CELL_SURFACE;CHANG_POU5F1_TARGETS_UP;chr17q21;COFACTOR_BINDING;COPPER_ION_BINDING;DEFENSE_RESPONSE;DELYS_THYROID_CANCER_DN;DURAND_STROMA_MAX_UP;ELECTRON_TRANSPORT_GO_0006118;GENERATION_OF_PRECURSO…	---	3D-structure;Alternativesplicing;Calcium;Celladhesion;Cellmembrane;Completeproteome;Copper;Directproteinsequencing;Disulfidebond;Glycoprotein;Membrane;Metal-binding;Oxidoreductase;Polymorphism;Referenceproteome;Signal-anchor;TPQ;Transmembrane;Transmembranehelix	+		+	Control vs CFNT;Control vs CFT		Membrane primary amine oxidase	AOC3	Q16853	Q16853	AOC3_HUMAN	3	91550000	15	0.00186215	0.0212593	1.69448
30.9971	30.6872	30.4587	31.9304	31.1835	32.1063	31.3248	31.0456	31.5792	30.0734	28.0229	28.1887	26.1726	30.0958	29.7954	29.2541	28.9749	30.8477	30.3364	29.7224	32.3975	28.1548	29.8136	29.4931	28.9019	28.4481	29.8587	axon guidance;biological adhesion;cell adhesion;cell differentiation;cellular component assembly;cellular component disassembly;cellular component disassembly at cellular level;cellular component organization;cellular component organization at cellular level;cellular component organization or biogenesis;cellular component organization or biogenesis at cellular level;cellular developmental process…	binding;growth factor binding;platelet-derived growth factor binding;protein binding	anchoring collagen;cell part;collagen;collagen type VI;cytoplasmic part;endoplasmic reticulum lumen;endoplasmic reticulum part;extracellular matrix;extracellular matrix part;extracellular membrane-bounded organelle;extracellular organelle;extracellular region;extracellular region part;extracellular vesicular exosome;intracellular organelle lumen;intracellular organelle part;intracellular part;lys…	ECM-receptor interaction;Focal adhesion;Protein digestion and absorption	ACEVEDO_LIVER_CANCER_DN;BERENJENO_TRANSFORMED_BY_RHOA_DN;BOQUEST_STEM_CELL_UP;BROWNE_HCMV_INFECTION_18HR_DN;BROWNE_HCMV_INFECTION_30MIN_UP;BROWNE_HCMV_INFECTION_48HR_DN;BRUINS_UVC_RESPONSE_LATE;BURTON_ADIPOGENESIS_4;CHARAFE_BREAST_CANCER_LUMINAL_VS_MESENCHYMAL_DN;CHEN_METABOLIC_SYNDROM_NETWORK;CHIARADONNA_NEOPLASTIC_TRANSFORMATION_KRAS_CDC25_DN;CHICAS_RB1_TARGETS_CONFLUENT;chr21q22;CLASPER_LYMPHA…	NABA_CORE_MATRISOME_Yes	Celladhesion;Collagen;Completeproteome;Directproteinsequencing;Diseasemutation;Extracellularmatrix;Glycoprotein;Hydroxylation;Polymorphism;Referenceproteome;Repeat;Secreted;Signal	+		+	Control vs CFNT;Control vs CFT		Collagen alpha-1(VI) chain	COL6A1	P12109	P12109	CO6A1_HUMAN	37	66524000000	2147	0.00375015	0.02525	1.79474
22.5352	22.2603	21.4195	21.5237	21.634	21.5014	21.3018	20.8105	21.3761	22.6821	20.4945	19.5163	20.3227	18.4096	19.373	19.2089	19.6099	19.0592	19.7482	17.8642	18.3354	18.8689	19.1832	19.9502	19.1994	19.4689	18.4775	cell cycle;cell cycle process;cell division;cellular component assembly;cellular component assembly at cellular level;cellular component organization;cellular component organization at cellular level;cellular component organization or biogenesis;cellular component organization or biogenesis at cellular level;cellular macromolecular complex assembly;cellular macromolecular complex subunit organiza…	binding;catalytic activity;GTP binding;GTPase activity;guanyl nucleotide binding;guanyl ribonucleotide binding;hydrolase activity;hydrolase activity, acting on acid anhydrides;hydrolase activity, acting on acid anhydrides, in phosphorus-containing anhydrides;nucleoside-triphosphatase activity;nucleotide binding;purine nucleotide binding;purine ribonucleoside triphosphate binding;purine ribonucleo…	cell part;cytoplasm;cytoplasmic microtubule;cytoplasmic part;cytoskeletal part;cytosol;endosome;extracellular membrane-bounded organelle;extracellular organelle;extracellular region part;extracellular vesicular exosome;intracellular membrane-bounded organelle;intracellular organelle;intracellular organelle part;intracellular part;macromolecular complex;membrane-bounded organelle;membrane-bounded …	Gap junction;Pathogenic Escherichia coli infection;Phagosome	ACEVEDO_LIVER_CANCER_UP;ACEVEDO_LIVER_TUMOR_VS_NORMAL_ADJACENT_TISSUE_UP;ALONSO_METASTASIS_EMT_UP;ALONSO_METASTASIS_UP;APRELIKOVA_BRCA1_TARGETS;ATGGYGGA_UNKNOWN;BASAKI_YBX1_TARGETS_UP;BENPORATH_CYCLING_GENES;BHAT_ESR1_TARGETS_VIA_AKT1_UP;BILD_MYC_ONCOGENIC_SIGNATURE;BIOCARTA_MTA3_PATHWAY;BLALOCK_ALZHEIMERS_DISEASE_UP;BLUM_RESPONSE_TO_SALIRASIB_DN;BORCZUK_MALIGNANT_MESOTHELIOMA_UP;BROWNE_HCMV_INFE…	---	Acetylation;Alternativesplicing;Completeproteome;Cytoplasm;Cytoskeleton;Directproteinsequencing;Diseasemutation;GTP-binding;Lissencephaly;Microtubule;Nitration;Nucleotide-binding;Phosphoprotein;Polymorphism;Referenceproteome	+		+	Control vs CFNT;Control vs CFT	+	Tubulin alpha-1A chain;Tubulin alpha-3C/D chain;Tubulin alpha-3E chain	TUBA1A;TUBA3C;TUBA3E	Q71U36;Q13748;Q6PEY2	Q71U36;Q13748;Q6PEY2	TBA1A_HUMAN	18	75571000	32	0.0015236	0.0186364	1.81791
23.317	22.085	21.8972	22.1055	24.1774	22.0419	22.1515	22.5926	18.6287	21.5723	19.9247	19.231	22.7463	22.1946	21.9821	19.5834	19.1154	21.729	22.3527	19.4242	18.4471	20.6684	21.408	21.5482	19.5734	23.7866	19.6937			cell part;cytoplasm;extracellular membrane-bounded organelle;extracellular organelle;extracellular region part;extracellular vesicular exosome;intracellular part;membrane-bounded organelle;membrane-bounded vesicle;organelle;vesicle		AGGCACT,MIR-515-3P;BENPORATH_SUZ12_TARGETS;BROWN_MYELOID_CELL_DEVELOPMENT_DN;BRUINS_UVC_RESPONSE_VIA_TP53_GROUP_A;BUYTAERT_PHOTODYNAMIC_THERAPY_STRESS_UP;CAGCTG_V$AP4_Q5;CHEN_METABOLIC_SYNDROM_NETWORK;chr16q22;CREIGHTON_ENDOCRINE_THERAPY_RESISTANCE_5;CUI_TCF21_TARGETS_2_DN;FULCHER_INFLAMMATORY_RESPONSE_LECTIN_VS_LPS_DN;GCM_NF2;GGGAGGRR_V$MAZ_Q6;GGGTGGRR_V$PAX4_03;GRAESSMANN_APOPTOSIS_BY_DOXORUBIC…	---	Alternativesplicing;Coiledcoil;Completeproteome;Cytoplasm;Phosphoprotein;Referenceproteome	+		+	Control vs CFNT;Control vs CFT		Protein FAM65A	FAM65A	Q6ZS17	Q6ZS17	RIPR1_HUMAN	7	150230000	25	0.00560233	0.0294141	1.83898
22.512	22.2928	21.9611	22.9041	21.9276	22.0672	22.4188	22.5034	22.2516	20.4596	19.5155	19.1924	21.0306	22.1842	22.105	19.0085	18.3598	21.5899	21.4722	18.4168	19.6692	19.0678	21.7824	21.7911	22.0363	18.3134	19.5639						---	Completeproteome;Referenceproteome	+		+	Control vs CFNT;Control vs CFT		Overexpressed in colon carcinoma 1 protein	OCC1	Q8TAD7	Q8TAD7		4	126790000	29	0.00304335	0.0223662	1.85786
22.802	22.4819	22.5248	23.8816	22.5305	22.3781	22.6566	22.5698	18.9839	22.2174	18.8009	22.9823	20.1318	22.4653	22.5932	19.3989	19.8744	18.7649	20.9885	22.7218	19.9897	18.8289	18.9039	18.9105	22.5846	18.9508	20.7578	anatomical structure development;anatomical structure morphogenesis;biological regulation;blood coagulation;carboxylic acid metabolic process;cell migration;cell motility;cell surface receptor linked signaling pathway;cellular component disassembly;cellular component disassembly at cellular level;cellular component movement;cellular component organization;cellular component organization at cellul…	binding;carbohydrate binding;mannose binding;monosaccharide binding;sugar binding	acrosomal membrane;adherens junction;anchoring junction;cell junction;cell part;cell-substrate adherens junction;cell-substrate junction;cytoplasmic membrane-bounded vesicle;cytoplasmic part;cytoplasmic vesicle;cytoplasmic vesicle membrane;cytoplasmic vesicle part;extracellular membrane-bounded organelle;extracellular organelle;extracellular region part;extracellular vesicular exosome;focal adhes…		BARRIER_COLON_CANCER_RECURRENCE_DN;BENPORATH_MYC_TARGETS_WITH_EBOX;BLALOCK_ALZHEIMERS_DISEASE_DN;CAIRO_HEPATOBLASTOMA_CLASSES_UP;CELL_SURFACE_RECEPTOR_LINKED_SIGNAL_TRANSDUCTION_GO_0007166;CHIBA_RESPONSE_TO_TSA;CHIBA_RESPONSE_TO_TSA_UP;chr19p13;CREIGHTON_AKT1_SIGNALING_VIA_MTOR_UP;DACOSTA_UV_RESPONSE_VIA_ERCC3_TTD_UP;DACOSTA_UV_RESPONSE_VIA_ERCC3_UP;DANG_BOUND_BY_MYC;DELACROIX_RARG_BOUND_MEF;DIAZ…	---	3D-structure;Alternativepromoterusage;Alternativesplicing;Bloodgroupantigen;Cellmembrane;Completeproteome;Directproteinsequencing;Disulfidebond;Glycoprotein;Immunoglobulindomain;Lectin;Mannose-binding;Membrane;Phosphoprotein;Polymorphism;Referenceproteome;Signal;Transmembrane;Transmembranehelix	+		+	Control vs CFNT;Control vs CFT	+	Basigin	BSG	P35613	P35613	BASI_HUMAN	2	185380000	6	0.00638394	0.031068	1.90122
24.4925	23.313	22.5638	23.6624	23.7892	24.2727	23.7423	23.362	23.6412	20.1352	20.1075	23.5769	20.1976	23.9309	20.3379	18.6755	23.3935	23.019	20.538	23.0974	24.4154	20.1492	20.2461	23.3554	20.1577	19.0314	19.5043	activation of immune response;biological regulation;cell death;cellular process;complement activation;complement activation, alternative pathway;complement activation, classical pathway;cytolysis;death;defense response;humoral immune response;immune effector process;immune response;immune system process;innate immune response;macromolecule metabolic process;metabolic process;positive regulation o…	binding;isoprenoid binding;lipid binding;retinoid binding;retinol binding;vitamin binding	blood microparticle;cell part;extracellular membrane-bounded organelle;extracellular organelle;extracellular region;extracellular region part;extracellular vesicular exosome;macromolecular complex;membrane attack complex;membrane part;membrane-bounded organelle;membrane-bounded vesicle;organelle;plasma membrane part;pore complex;protein complex;vesicle	Amoebiasis;Complement and coagulation cascades;Prion diseases;Systemic lupus erythematosus	BILANGES_SERUM_AND_RAPAMYCIN_SENSITIVE_GENES;BROWNE_HCMV_INFECTION_48HR_DN;CAIRO_HEPATOBLASTOMA_DN;CAIRO_LIVER_DEVELOPMENT_DN;CHANGOLKAR_H2AFY_TARGETS_DN;CHEN_METABOLIC_SYNDROM_NETWORK;GNF2_CEBPA;GNF2_CYP2B6;GNF2_GSTM1;GNF2_HPN;GNF2_HPX;GNF2_IGF1;GNF2_LCAT;GNF2_TST;GSE13306_LAMINA_PROPRIA_VS_SPLEEN_TREG_DN;GSE13306_RA_VS_UNTREATED_TREG_DN;GSE13485_CTRL_VS_DAY3_YF17D_VACCINE_PBMC_UP;GSE13485_CTRL_…	---	3D-structure;Complementalternatepathway;Complementpathway;Completeproteome;Cytolysis;Directproteinsequencing;Disulfidebond;Immunity;Innateimmunity;Membraneattackcomplex;Polymorphism;Pyrrolidonecarboxylicacid;Referenceproteome;Retinol-binding;Secreted;Signal	+		+	Control vs CFNT;Control vs CFT		Complement component C8 gamma chain	C8G	P07360	P07360	CO8G_HUMAN	5	363870000	49	0.0117666	0.0447883	1.92886
22.5557	22.5737	22.4305	22.3502	23.1265	21.9252	21.8985	23.6926	22.515	19.148	19.7943	22.5517	20.572	22.49	19.1394	19.3928	19.5497	22.4183	20.4422	19.6109	18.9782	18.7099	22.8922	21.9794	21.8349	18.8468	21.0652	actin cytoskeleton organization;actin cytoskeleton reorganization;actin filament-based process;activation of JNKK activity;activation of MAPKK activity;activation of protein kinase activity;anatomical structure morphogenesis;biological regulation;cell communication;cell part morphogenesis;cell projection assembly;cell projection morphogenesis;cell projection organization;cell surface receptor lin…	adenyl nucleotide binding;adenyl ribonucleotide binding;ATP binding;binding;catalytic activity;creatine kinase activity;kinase activity;nucleotide binding;phosphotransferase activity, alcohol group as acceptor;phosphotransferase activity, nitrogenous group as acceptor;protein kinase activity;protein serine/threonine kinase activity;purine nucleotide binding;purine ribonucleoside triphosphate bind…	apical plasma membrane;axon;cell junction;cell part;cell projection;cytoplasm;cytoplasmic part;cytoskeletal part;cytoskeleton;cytosol;dendrite;endosome;extracellular membrane-bounded organelle;extracellular organelle;extracellular region part;extracellular vesicular exosome;Golgi apparatus;intracellular membrane-bounded organelle;intracellular non-membrane-bounded organelle;intracellular organell…	MAPK signaling pathway	AAAGACA,MIR-511;AACTGGA,MIR-145;AAGCACT,MIR-520F;AATGGAG,MIR-136;AATGTGA,MIR-23A,MIR-23B;ACEVEDO_FGFR1_TARGETS_IN_PROSTATE_CANCER_MODEL_UP;ACEVEDO_LIVER_CANCER_WITH_H3K27ME3_UP;ACOSTA_PROLIFERATION_INDEPENDENT_MYC_TARGETS_DN;ADENYL_NUCLEOTIDE_BINDING;ADENYL_RIBONUCLEOTIDE_BINDING;AGCACTT,MIR-93,MIR-302A,MIR-302B,MIR-302C,MIR-302D,MIR-372,MIR-373,MIR-520E,MIR-520A,MIR-526B,MIR-520B,MIR-520C,MIR-52…	---	3D-structure;Acetylation;Alternativesplicing;ATP-binding;Celljunction;Cellmembrane;Cellprojection;Completeproteome;Cytoplasm;Cytoskeleton;Endosome;Golgiapparatus;Kinase;Membrane;Neurogenesis;Nucleotide-binding;Nucleus;Phosphoprotein;Polymorphism;Postsynapticcellmembrane;Referenceproteome;Serine/threonine-proteinkinase;Synapse;Transferase;Wntsignalingpathway	+		+	Control vs CFNT;Control vs CFT		Misshapen-like kinase 1;Mitogen-activated protein kinase kinase kinase kinase 4;TRAF2 and NCK-interacting protein kinase	MINK1;MAP4K4;TNIK	Q8N4C8;O95819;Q9UKE5	Q8N4C8;O95819;Q9UKE5	M4K4_HUMAN;MINK1_HUMAN;TNIK_HUMAN	4	151770000	9	0.00217117	0.0214118	1.93375
22.4293	21.8433	21.9015	22.1071	22.0782	22.9998	22.2676	22.2445	22.2842	21.9448	20.1369	18.6771	19.4882	21.6456	21.8441	19.9371	19.8339	17.7344	21.4166	18.1693	22.8773	19.7807	19.1437	19.629	18.7166	18.9929	18.5822	cellular component organization;cellular component organization at cellular level;cellular component organization or biogenesis;cellular component organization or biogenesis at cellular level;cellular process;lipid particle organization;organelle organization		cell part;cell surface;cytoplasmic part;endoplasmic reticulum membrane;endoplasmic reticulum part;Golgi apparatus;integral to membrane;intracellular membrane-bounded organelle;intracellular organelle;intracellular organelle part;intracellular part;intrinsic to membrane;membrane;membrane part;membrane-bounded organelle;organelle;organelle membrane;organelle part		AACTTT_UNKNOWN;AAGCAAT,MIR-137;ACCATTT,MIR-522;AGTTCTC,MIR-146A,MIR-146B;ATACTGT,MIR-144;BYSTRYKH_HEMATOPOIESIS_STEM_CELL_QTL_TRANS;CAATGCA,MIR-33;CAGCTG_V$AP4_Q5;CAGGTA_V$AREB6_01;CHANGOLKAR_H2AFY_TARGETS_UP;chr1p13;CREIGHTON_ENDOCRINE_THERAPY_RESISTANCE_3;CREIGHTON_ENDOCRINE_THERAPY_RESISTANCE_5;CTTTGCA,MIR-527;CTTTGT_V$LEF1_Q2;DOUGLAS_BMI1_TARGETS_UP;ENGELMANN_CANCER_PROGENITORS_DN;GCACCTT,MIR…	---	Completeproteome;Directproteinsequencing;Disulfidebond;Endoplasmicreticulum;Glycoprotein;Golgiapparatus;Immunoglobulindomain;Membrane;Phosphoprotein;Polymorphism;Referenceproteome;Repeat;Signal;Transmembrane;Transmembranehelix	+		+	Control vs CFNT;Control vs CFT	+	Prostaglandin F2 receptor negative regulator	PTGFRN	Q9P2B2	Q9P2B2	FPRP_HUMAN	4	139180000	15	0.00266098	0.0222069	1.97457
26.6619	26.3745	25.8651	27.1367	25.6652	27.6151	27.4849	26.0137	23.9697	26.485	22.6744	24.0542	20.881	25.975	25.2874	24.0857	24.7197	24.9749	25.4409	26.0304	25.8225	22.9422	24.9968	25.4243	26.2143	23.2775	24.937	acute inflammatory response;aging;biological regulation;calcium ion homeostasis;carbohydrate metabolic process;cation homeostasis;cell surface receptor linked signaling pathway;cellular metabolic process;cellular process;cellular response to chemical stimulus;cellular response to endogenous stimulus;cellular response to fibroblast growth factor stimulus;cellular response to growth factor stimulus…	beta-glucosidase activity;beta-glucuronidase activity;binding;catalytic activity;fibroblast growth factor binding;glucosidase activity;growth factor binding;hydrolase activity;hydrolase activity, acting on glycosyl bonds;hydrolase activity, hydrolyzing O-glycosyl compounds;lipid binding;molecular transducer activity;protein binding;signal transducer activity;steroid binding;vitamin binding;vitami…	cell part;extracellular membrane-bounded organelle;extracellular organelle;extracellular region;extracellular region part;extracellular space;extracellular vesicular exosome;integral to membrane;integral to plasma membrane;intrinsic to membrane;intrinsic to plasma membrane;membrane;membrane part;membrane-bounded organelle;membrane-bounded vesicle;organelle;plasma membrane;plasma membrane part;ves…	Endocrine and other factor-regulated calcium reabsorption;Pentose and glucuronate interconversions;Starch and sucrose metabolism	ACACTGG,MIR-199A,MIR-199B;ACAGGGT,MIR-10A,MIR-10B;ACEVEDO_LIVER_CANCER_WITH_H3K27ME3_UP;AGING;ANATOMICAL_STRUCTURE_DEVELOPMENT;BENPORATH_EED_TARGETS;BENPORATH_ES_WITH_H3K27ME3;BENPORATH_PRC2_TARGETS;BENPORATH_SUZ12_TARGETS;BLALOCK_ALZHEIMERS_DISEASE_DN;BONE_REMODELING;BONOME_OVARIAN_CANCER_POOR_SURVIVAL_UP;BONOME_OVARIAN_CANCER_SURVIVAL_SUBOPTIMAL_DEBULKING;BOQUEST_STEM_CELL_DN;CELL_FRACTION;chr1…	---	Alternativesplicing;Cellmembrane;Completeproteome;Diseasemutation;Glycoprotein;Glycosidase;Hormone;Hydrolase;Membrane;Polymorphism;Referenceproteome;Repeat;Secreted;Signal;Transmembrane;Transmembranehelix;VitaminD	+		+	Control vs CFNT;Control vs CFT		Klotho;Klotho peptide	KL	Q9UEF7	Q9UEF7	KLOT_HUMAN	24	2859100000	370	0.0030686	0.0228571	2.05394
23.2145	23.0158	23.1287	23.4298	22.6887	23.8576	24.0585	22.7686	22.3498	23.1956	20.2376	19.768	19.4496	22.8884	17.9898	22.4906	18.995	22.5946	22.8005	21.7792	20.8174	22.0716	18.9901	22.9385	21.7519	18.4615	22.7461	axon ensheathment;biosynthetic process;carbohydrate metabolic process;cellular biosynthetic process;cellular carbohydrate metabolic process;cellular lipid metabolic process;cellular macromolecule metabolic process;cellular metabolic process;cellular process;cellular protein metabolic process;ceramide biosynthetic process;ceramide metabolic process;ensheathment of neurons;galactolipid biosynthetic…	catalytic activity;galactose 3-O-sulfotransferase activity;galactosylceramide sulfotransferase activity;sulfotransferase activity;transferase activity;transferase activity, transferring sulfur-containing groups	cell part;cytoplasmic part;Golgi apparatus part;Golgi membrane;integral to membrane;integral to plasma membrane;intracellular organelle part;intracellular part;intrinsic to membrane;intrinsic to plasma membrane;membrane;membrane part;organelle membrane;organelle part;plasma membrane part	Sphingolipid metabolism	BASAKI_YBX1_TARGETS_DN;BIOPOLYMER_METABOLIC_PROCESS;BIOPOLYMER_MODIFICATION;BIOSYNTHETIC_PROCESS;BLALOCK_ALZHEIMERS_DISEASE_UP;CAHOY_OLIGODENDROCUTIC;CELL_FRACTION;CELLULAR_MACROMOLECULE_METABOLIC_PROCESS;CELLULAR_PROTEIN_METABOLIC_PROCESS;CHEN_METABOLIC_SYNDROM_NETWORK;chr22q12;GLYCOPROTEIN_BIOSYNTHETIC_PROCESS;GLYCOPROTEIN_METABOLIC_PROCESS;GOBERT_OLIGODENDROCYTE_DIFFERENTIATION_DN;GRAESSMANN_A…	---	Completeproteome;Directproteinsequencing;Glycoprotein;Golgiapparatus;Lipidmetabolism;Membrane;Polymorphism;Referenceproteome;Signal-anchor;Sphingolipidmetabolism;Transferase;Transmembrane;Transmembranehelix	+		+	Control vs CFNT;Control vs CFT		Galactosylceramide sulfotransferase	GAL3ST1	Q99999	Q99999	G3ST1_HUMAN	6	323330000	28	0.00587217	0.0283368	2.05872
22.5743	22.8026	22.673	23.2071	22.8739	23.6137	22.641	22.2937	22.6648	22.1579	20.1111	19.4696	19.9568	19.4891	22.1584	19.3243	19.8105	22.8441	18.8152	21.9572	22.4879	19.4441	19.622	22.6361	22.8347	19.5899	21.5507	alcohol metabolic process;amine metabolic process;benzene-containing compound metabolic process;biological regulation;biosynthetic process;body fluid secretion;catecholamine metabolic process;catechol-containing compound metabolic process;cell surface receptor linked signaling pathway;cellular amine metabolic process;cellular aromatic compound metabolic process;cellular biogenic amine metabolic p…	adenyl nucleotide binding;adenyl ribonucleotide binding;ATP binding;binding;catalytic activity;cyclase activity;G-protein coupled receptor activity;GTP binding;guanyl nucleotide binding;guanyl ribonucleotide binding;guanylate cyclase activity;hormone binding;kinase activity;lyase activity;molecular transducer activity;natriuretic peptide receptor activity;nucleotide binding;peptide binding;peptid…	cell part;integral to membrane;integral to plasma membrane;intrinsic to membrane;intrinsic to plasma membrane;macromolecular complex;membrane part;plasma membrane part;protein complex;receptor complex	Purine metabolism;Vascular smooth muscle contraction	ANATOMICAL_STRUCTURE_DEVELOPMENT;ANATOMICAL_STRUCTURE_FORMATION;ANATOMICAL_STRUCTURE_MORPHOGENESIS;ANGIOGENESIS;BENPORATH_ES_WITH_H3K27ME3;BODY_FLUID_SECRETION;CAGGTG_V$E12_Q6;CHEMICAL_HOMEOSTASIS;chr1q21;DELYS_THYROID_CANCER_DN;E2F1_UP.V1_DN;ENK_UV_RESPONSE_KERATINOCYTE_UP;ESTABLISHMENT_OF_LOCALIZATION;EXCRETION;GSE10239_MEMORY_VS_KLRG1INT_EFF_CD8_TCELL_UP;GSE10239_NAIVE_VS_MEMORY_CD8_TCELL_DN;G…	---	cGMPbiosynthesis;Chloride;Completeproteome;Disulfidebond;Glycoprotein;GTP-binding;Lyase;Membrane;Nucleotide-binding;Phosphoprotein;Polymorphism;Receptor;Referenceproteome;Signal;Transmembrane;Transmembranehelix;Vasoactive	+		+	Control vs CFNT;Control vs CFT		Atrial natriuretic peptide receptor 1	NPR1	P16066	P16066	ANPRA_HUMAN	3	174600000	22	0.00112305	0.0149677	2.10501
22.8198	22.3511	22.9124	22.8419	23.5321	23.6025	22.8838	23.3237	19.1222	20.917	18.4224	23.7338	20.153	23.2978	22.6508	20.8122	20.177	22.9217	19.5601	19.3248	17.9988	18.2485	23.335	22.5507	22.5004	18.7204	20.1138	biosynthetic process;carbohydrate metabolic process;catabolic process;cellular biosynthetic process;cellular carbohydrate metabolic process;cellular component organization;cellular component organization at cellular level;cellular component organization or biogenesis;cellular component organization or biogenesis at cellular level;cellular lipid metabolic process;cellular metabolic process;cellula…	catalytic activity;hydrolase activity;hydrolase activity, acting on ester bonds;inositol or phosphatidylinositol phosphatase activity;inositol phosphate phosphatase activity;inositol trisphosphate phosphatase activity;inositol-polyphosphate 5-phosphatase activity;phosphatase activity;phosphatidylinositol bisphosphate phosphatase activity;phosphatidylinositol phosphate 5-phosphatase activity;phosp…	axoneme;cell part;cell projection;cell projection part;cilium;cytoplasmic part;cytoskeleton;cytosol;Golgi apparatus part;Golgi cisterna membrane;Golgi membrane;intracellular non-membrane-bounded organelle;intracellular organelle;intracellular organelle part;intracellular part;membrane;non-membrane-bounded organelle;organelle;organelle membrane;organelle part;plasma membrane;primary cilium;ruffle	Inositol phosphate metabolism;Phosphatidylinositol signaling system	BUYTAERT_PHOTODYNAMIC_THERAPY_STRESS_UP;chr9q34;GOBERT_OLIGODENDROCYTE_DIFFERENTIATION_DN;GSE12845_IGD_POS_BLOOD_VS_DARKZONE_GC_TONSIL_BCELL_UP;GSE14000_4H_VS_16H_LPS_DC_TRANSLATED_RNA_DN;GSE14000_UNSTIM_VS_16H_LPS_DC_TRANSLATED_RNA_DN;GSE17721_0.5H_VS_4H_LPS_BMDM_UP;GSE17721_CTRL_VS_LPS_4H_BMDM_UP;GSE17721_CTRL_VS_LPS_8H_BMDM_UP;GSE17721_POLYIC_VS_PAM3CSK4_2H_BMDM_UP;GSE20715_0H_VS_6H_OZONE_TLR4…	---	3D-structure;Alternativesplicing;Cellmembrane;Cellprojection;Ciliopathy;Cilium;Completeproteome;Cytoplasm;Cytoskeleton;Diseasemutation;Golgiapparatus;Hydrolase;Joubertsyndrome;Lipidmetabolism;Lipoprotein;Membrane;Mentalretardation;Methylation;Obesity;Phosphoprotein;Polymorphism;Prenylation;Referenceproteome;Repeat	+		+	Control vs CFNT;Control vs CFT		72 kDa inositol polyphosphate 5-phosphatase	INPP5E	Q9NRR6	Q9NRR6	INP5E_HUMAN	4	216310000	26	0.00464365	0.0250732	2.10901
27.8342	26.5703	27.5394	27.8797	28.0365	27.7239	27.7688	28.3013	26.2962	25.167	24.9205	24.7746	20.5774	26.8278	26.1472	25.9462	27.1472	26.6335	26.8928	25.4488	27.2632	25.8783	26.2622	26.5254	25.1862	24.5921	25.2982	biological regulation;cell redox homeostasis;cellular homeostasis;cellular macromolecule metabolic process;cellular metabolic process;cellular process;cellular protein metabolic process;homeostatic process;macromolecule metabolic process;metabolic process;negative regulation of autophagy;negative regulation of biological process;negative regulation of catabolic process;negative regulation of cell…	catalytic activity;flavin-linked sulfhydryl oxidase activity;intramolecular oxidoreductase activity;intramolecular oxidoreductase activity, interconverting keto- and enol-groups;intramolecular oxidoreductase activity, transposing S-S bonds;isomerase activity;oxidoreductase activity;oxidoreductase activity, acting on a sulfur group of donors;oxidoreductase activity, acting on a sulfur group of don…	cell part;cytoplasmic part;extracellular membrane-bounded organelle;extracellular organelle;extracellular region part;extracellular space;extracellular vesicular exosome;Golgi apparatus;Golgi apparatus part;integral to Golgi membrane;integral to membrane;integral to organelle membrane;intercellular bridge;intracellular membrane-bounded organelle;intracellular organelle;intracellular organelle par…		ACEVEDO_LIVER_CANCER_WITH_H3K27ME3_UP;ALFANO_MYC_TARGETS;BIOPOLYMER_METABOLIC_PROCESS;BIOPOLYMER_MODIFICATION;BLUM_RESPONSE_TO_SALIRASIB_UP;BOCHKIS_FOXA2_TARGETS;BORCZUK_MALIGNANT_MESOTHELIOMA_UP;BOYAULT_LIVER_CANCER_SUBCLASS_G56_DN;BREDEMEYER_RAG_SIGNALING_VIA_ATM_NOT_VIA_NFKB_UP;BROWN_MYELOID_CELL_DEVELOPMENT_UP;BRUINS_UVC_RESPONSE_VIA_TP53_GROUP_B;BYSTRYKH_HEMATOPOIESIS_STEM_CELL_QTL_TRANS;CAT…	---	3D-structure;Alternativesplicing;Completeproteome;Disulfidebond;FAD;Flavoprotein;Glycoprotein;Golgiapparatus;Membrane;Oxidoreductase;Polymorphism;Referenceproteome;Secreted;Signal;Transmembrane;Transmembranehelix	+		+	Control vs CFNT;Control vs CFT		Sulfhydryl oxidase 1	QSOX1	O00391	O00391	QSOX1_HUMAN	18	4782600000	538	0.00380268	0.02192	2.14183
23.4611	23.6474	23.2643	23.3852	24.0402	23.5641	23.207	23.9998	22.5887	23.5045	18.6434	22.6508	23.7664	23.5169	23.6793	17.8823	19.6356	19.9681	20.2537	20.5969	20.2841	20.4586	23.1034	22.8804	23.6158	19.0375	20.04	biosynthetic process;cellular biosynthetic process;cellular metabolic process;cellular process;melanin biosynthetic process;melanin metabolic process;metabolic process;pigment biosynthetic process;pigment metabolic process;secondary metabolic process	carbon-carbon lyase activity;carboxy-lyase activity;catalytic activity;D-dopachrome decarboxylase activity;dopachrome isomerase activity;intramolecular oxidoreductase activity;intramolecular oxidoreductase activity, transposing C=C bonds;isomerase activity;lyase activity	cell part;cytoplasm;extracellular membrane-bounded organelle;extracellular organelle;extracellular region part;extracellular vesicular exosome;intracellular part;membrane-bounded organelle;membrane-bounded vesicle;organelle;vesicle		AGUIRRE_PANCREATIC_CANCER_COPY_NUMBER_UP;BLALOCK_ALZHEIMERS_DISEASE_DN;BORCZUK_MALIGNANT_MESOTHELIOMA_DN;BROWNE_HCMV_INFECTION_18HR_DN;BURTON_ADIPOGENESIS_6;CAIRO_HEPATOBLASTOMA_DN;CHEN_HOXA5_TARGETS_9HR_DN;CHEN_METABOLIC_SYNDROM_NETWORK;chr22q11;ENK_UV_RESPONSE_KERATINOCYTE_UP;FLECHNER_BIOPSY_KIDNEY_TRANSPLANT_REJECTED_VS_OK_DN;GRUETZMANN_PANCREATIC_CANCER_DN;GSE11924_TH2_VS_TH17_CD4_TCELL_DN;GS…	---	3D-structure;Acetylation;Alternativesplicing;Completeproteome;Cytoplasm;Directproteinsequencing;Lyase;Melaninbiosynthesis;Referenceproteome	+		+	Control vs CFNT;Control vs CFT		D-dopachrome decarboxylase;D-dopachrome decarboxylase-like protein	DDT;DDTL	P30046;A6NHG4	P30046;A6NHG4	DDTL_HUMAN;DOPD_HUMAN	3	330490000	54	0.0105553	0.0388976	2.18058
24.9521	27.1275	22.5062	24.7113	23.5819	23.3955	25.7583	21.3209	22.3485	22.0344	22.8914	21.4994	20.6345	23.625	22.5326	22.3622	19.156	21.8757	20.2348	24.6595	20.9206	18.9457	17.7207	20.6205	24.0389	22.3172	20.4134	biological regulation;multi-organism process;positive regulation of biological process;positive regulation of cellular metabolic process;positive regulation of cellular process;positive regulation of cellular protein metabolic process;positive regulation of glucose import;positive regulation of glucose transport;positive regulation of macromolecule metabolic process;positive regulation of metabol…	binding;carbohydrate binding	anchored to membrane;brush border membrane;cell part;cell projection membrane;cell projection part;extracellular membrane-bounded organelle;extracellular organelle;extracellular region;extracellular region part;extracellular vesicular exosome;intrinsic to membrane;macromolecular complex;membrane part;membrane raft;membrane-bounded organelle;membrane-bounded vesicle;organelle;plasma membrane part;…		ACEVEDO_FGFR1_TARGETS_IN_PROSTATE_CANCER_MODEL_DN;AKT_UP_MTOR_DN.V1_DN;BAUS_TFF2_TARGETS_UP;BIOPOLYMER_METABOLIC_PROCESS;BIOPOLYMER_MODIFICATION;BRUSH_BORDER;BYSTRYKH_HEMATOPOIESIS_STEM_CELL_QTL_CIS;CARBOHYDRATE_TRANSPORT;CELL_PROJECTION;CELL_PROJECTION_PART;CELLULAR_MACROMOLECULE_METABOLIC_PROCESS;CELLULAR_PROTEIN_METABOLIC_PROCESS;CHEN_LIVER_METABOLISM_QTL_CIS;chr1q21;chr1q22;ESTABLISHMENT_OF_L…	---	Alternativesplicing;Cellmembrane;Completeproteome;Directproteinsequencing;Disulfidebond;Glycoprotein;GPI-anchor;Lectin;Lipoprotein;Membrane;Polymorphism;Referenceproteome;Secreted;Signal	+		+	Control vs CFNT;Control vs CFT	+	Intelectin-1;Intelectin-2	ITLN1;ITLN2	Q8WWA0;Q8WWU7	Q8WWA0;Q8WWU7	ITLN1_HUMAN;ITLN2_HUMAN	8	657340000	91	0.00924131	0.0348571	2.18137
22.4295	22.8485	22.7175	22.7972	23.6479	23.4963	22.4538	23.3435	22.3985	18.0571	19.8193	19.5394	22.9574	23.1182	22.6775	19.0753	20.2207	19.3599	22.8117	19.0883	18.5779	20.5693	22.5194	22.3079	22.8574	22.1076	19.8348	biological regulation;cellular macromolecule metabolic process;cellular metabolic process;cellular process;cellular protein metabolic process;endosome to lysosome transport;endosome transport;establishment of localization;establishment of localization in cell;intracellular transport;lysosomal transport;macromolecule metabolic process;macromolecule modification;metabolic process;negative regulatio…	acid-amino acid ligase activity;binding;catalytic activity;cation binding;ion binding;ligase activity;ligase activity, forming carbon-nitrogen bonds;metal ion binding;small conjugating protein ligase activity;transition metal ion binding;ubiquitin-protein ligase activity;zinc ion binding	cell part;cytoplasm;cytoplasmic part;cytosol;early endosome;endosome;extracellular membrane-bounded organelle;extracellular organelle;extracellular region part;extracellular vesicular exosome;intracellular membrane-bounded organelle;intracellular organelle;intracellular part;membrane;membrane-bounded organelle;membrane-bounded vesicle;nucleus;organelle;plasma membrane;vesicle	Ubiquitin mediated proteolysis	ACEVEDO_NORMAL_TISSUE_ADJACENT_TO_LIVER_TUMOR_DN;AMBROSINI_FLAVOPIRIDOL_TREATMENT_TP53;ATGAAGG,MIR-205;BREDEMEYER_RAG_SIGNALING_VIA_ATM_NOT_VIA_NFKB_DN;BROWNE_HCMV_INFECTION_1HR_DN;BROWNE_HCMV_INFECTION_48HR_DN;CHARAFE_BREAST_CANCER_LUMINAL_VS_BASAL_UP;chr16p13;chr17q25;DASU_IL6_SIGNALING_SCAR_UP;DASU_IL6_SIGNALING_UP;DELYS_THYROID_CANCER_UP;FORTSCHEGGER_PHF8_TARGETS_DN;GSE11057_CD4_EFF_MEM_VS_PB…	---	Alternativesplicing;Cellmembrane;Completeproteome;Cytoplasm;Endosome;Ligase;Lipoprotein;Membrane;Metal-binding;Myristate;Nucleus;Phosphoprotein;Polymorphism;Referenceproteome;Ublconjugation;Ublconjugationpathway;Zinc;Zinc-finger	+		+	Control vs CFNT;Control vs CFT		E3 ubiquitin-protein ligase MGRN1	MGRN1	O60291;Q96PX1	O60291	MGRN1_HUMAN	5	217830000	43	0.00454309	0.0240506	2.2065
27.0148	27.6632	25.9678	26.3428	25.8331	26.8002	27.2435	25.1377	24.4351	25.1458	22.7154	22.548	19.9258	24.5472	26.8658	26.2894	23.2328	25.4193	25.1222	25.2777	22.2879	23.8867	22.3142	25.9662	25.4602	25.2157	23.9027			extracellular membrane-bounded organelle;extracellular organelle;extracellular region part;extracellular vesicular exosome;membrane-bounded organelle;membrane-bounded vesicle;organelle;vesicle		ACEVEDO_LIVER_CANCER_DN;ACEVEDO_LIVER_TUMOR_VS_NORMAL_ADJACENT_TISSUE_DN;ANASTASSIOU_CANCER_MESENCHYMAL_TRANSITION_SIGNATURE;BMI1_DN_MEL18_DN.V1_DN;BOQUEST_STEM_CELL_UP;BROWNE_HCMV_INFECTION_24HR_DN;CHANDRAN_METASTASIS_DN;CHIANG_LIVER_CANCER_SUBCLASS_CTNNB1_DN;CHICAS_RB1_TARGETS_SENESCENT;chrxp22;GSE360_HIGH_VS_LOW_DOSE_B_MALAYI_DC_DN;GSE360_L_DONOVANI_VS_T_GONDII_DC_UP;GSE360_L_MAJOR_VS_T_GONDII…	NABA_CORE_MATRISOME_Yes	Completeproteome;Disulfidebond;Glycoprotein;Leucine-richrepeat;Polymorphism;Referenceproteome;Repeat;Secreted;Signal	+		+	Control vs CFNT;Control vs CFT		Matrix-remodeling-associated protein 5	MXRA5	Q9NR99	Q9NR99	MXRA5_HUMAN	31	2403600000	332	0.00674921	0.0296327	2.20667
26.249	23.2209	22.489	24.9819	24.3521	25.8466	26.9616	23.9021	24.5541	23.6301	23.1045	20.4811	19.9567	22.2886	23.3863	23.1405	21.6005	25.1453	23.8156	19.4196	22.768	18.8352	23.0462	23.8011	23.4151	22.3573	22.5201	cellular component organization;cellular component organization at cellular level;cellular component organization or biogenesis;cellular component organization or biogenesis at cellular level;cellular process;extracellular matrix organization;extracellular structure organization	binding;calcium ion binding;cation binding;extracellular matrix structural constituent;ion binding;metal ion binding;structural molecule activity	basement membrane;extracellular matrix part;extracellular membrane-bounded organelle;extracellular organelle;extracellular region;extracellular region part;extracellular vesicular exosome;membrane-bounded organelle;membrane-bounded vesicle;organelle;vesicle		AKT_UP.V1_DN;BASEMENT_MEMBRANE;BLALOCK_ALZHEIMERS_DISEASE_INCIPIENT_UP;BLALOCK_ALZHEIMERS_DISEASE_UP;BROWNE_HCMV_INFECTION_48HR_DN;BRUINS_UVC_RESPONSE_LATE;BUYTAERT_PHOTODYNAMIC_THERAPY_STRESS_DN;CHANDRAN_METASTASIS_DN;CHARAFE_BREAST_CANCER_LUMINAL_VS_MESENCHYMAL_DN;CHEBOTAEV_GR_TARGETS_DN;CHEN_METABOLIC_SYNDROM_NETWORK;CHICAS_RB1_TARGETS_CONFLUENT;chr11q13;DAVICIONI_MOLECULAR_ARMS_VS_ERMS_DN;DOD…	NABA_CORE_MATRISOME_Yes	3D-structure;Calcium;Completeproteome;Diseasemutation;Disulfidebond;EGF-likedomain;Glycoprotein;Polymorphism;Referenceproteome;Repeat;Secreted;Signal	+		+	Control vs CFNT;Control vs CFT		EGF-containing fibulin-like extracellular matrix protein 2	EFEMP2	O95967	O95967	FBLN4_HUMAN	8	909730000	75	0.0116404	0.0419845	2.20683
22.4317	22.7818	22.4528	22.4708	22.8224	22.4132	22.2224	22.733	19.2777	22.6684	20.133	19.1374	20.0065	22.2665	22.3358	19.6232	19.8575	19.957	19.6635	18.5943	20.6195	18.3138	19.6452	23.0455	22.7113	19.8843	20.7069	anatomical structure development;biological regulation;brain development;catabolic process;developmental process;gamete generation;lipid catabolic process;lipid metabolic process;male gamete generation;metabolic process;multicellular organismal process;multicellular organismal reproductive process;organ development;positive regulation of autophagy;positive regulation of biological process;positiv…	1-alkyl-2-acetylglycerophosphocholine esterase activity;acetyltransferase activity;carboxylic ester hydrolase activity;catalytic activity;hydrolase activity;hydrolase activity, acting on ester bonds;platelet-activating factor acetyltransferase activity;transferase activity;transferase activity, transferring acyl groups;transferase activity, transferring acyl groups other than amino-acyl groups	cell part;cytoplasm;cytoplasmic part;cytosol;extracellular membrane-bounded organelle;extracellular organelle;extracellular region part;extracellular vesicular exosome;intracellular non-membrane-bounded organelle;intracellular organelle;intracellular organelle part;intracellular part;membrane;membrane-bounded organelle;membrane-bounded vesicle;non-membrane-bounded organelle;nuclear part;nucleolus…	Ether lipid metabolism	AGGCACT,MIR-515-3P;BAKKER_FOXO3_TARGETS_DN;BYSTRYKH_HEMATOPOIESIS_STEM_CELL_QTL_TRANS;CACTTTG,MIR-520G,MIR-520H;CAGTGTT,MIR-141,MIR-200A;CATTGTYY_V$SOX9_B1;chr11q23;CTTTGCA,MIR-527;CYCLIN_D1_UP.V1_DN;CYTOPLASM;FORTSCHEGGER_PHF8_TARGETS_DN;GAZDA_DIAMOND_BLACKFAN_ANEMIA_ERYTHROID_DN;GCACTTT,MIR-17-5P,MIR-20A,MIR-106A,MIR-106B,MIR-20B,MIR-519D;GCGNNANTTCC_UNKNOWN;GCM_BCL2L1;GCM_MLL;GCM_MYST2;GCM_NCA…	---	3D-structure;Acetylation;Alternativesplicing;Completeproteome;Cytoplasm;Directproteinsequencing;Hydrolase;Lipiddegradation;Lipidmetabolism;Phosphoprotein;Referenceproteome	+		+	Control vs CFNT;Control vs CFT	+	Platelet-activating factor acetylhydrolase IB subunit beta	PAFAH1B2	P68402	P68402	PA1B2_HUMAN	2	164720000	34	0.000217194	0.0072	2.24761
25.0969	24.0612	25.2649	24.8875	25.6664	24.8499	24.3521	25.351	22.1028	22.1454	19.5449	23.8036	19.8557	24.4151	23.9691	25.3543	23.2723	23.2671	22.948	21.1439	22.1628	22.4653	24.6733	22.8869	24.1528	23.8731	23.4674	acylglycerol catabolic process;acylglycerol metabolic process;biological regulation;carboxylic acid metabolic process;catabolic process;cellular catabolic process;cellular ketone metabolic process;cellular lipid catabolic process;cellular lipid metabolic process;cellular metabolic process;cellular process;chemical homeostasis;cholesterol homeostasis;fatty acid metabolic process;glycerol ether cat…	binding;carboxylic acid binding;cytoskeletal protein binding;fatty acid binding;fatty acid transporter activity;icosanoid binding;icosatetraenoic acid binding;lipid binding;lipid transporter activity;long-chain fatty acid transporter activity;monocarboxylic acid binding;oleic acid binding;protein binding;substrate-specific transporter activity;transporter activity	cell part;cytoplasm;cytoplasmic part;cytosol;extracellular membrane-bounded organelle;extracellular organelle;extracellular region part;extracellular space;extracellular vesicular exosome;intracellular part;membrane-bounded organelle;membrane-bounded vesicle;organelle;sarcoplasm;vesicle	PPAR signaling pathway	AFFAR_YY1_TARGETS_UP;BLALOCK_ALZHEIMERS_DISEASE_DN;BROWNE_HCMV_INFECTION_16HR_DN;CACGTG_V$MYC_Q2;CAGGTG_V$E12_Q6;CAHOY_NEURONAL;CAIRO_HEPATOBLASTOMA_CLASSES_DN;CELL_PROLIFERATION_GO_0008283;CHANG_CORE_SERUM_RESPONSE_DN;chr1p33;DEMAGALHAES_AGING_DN;EBAUER_TARGETS_OF_PAX3_FOXO1_FUSION_UP;FOSTER_TOLERANT_MACROPHAGE_UP;FULCHER_INFLAMMATORY_RESPONSE_LECTIN_VS_LPS_UP;GAUSSMANN_MLL_AF4_FUSION_TARGETS_E_…	---	3D-structure;Acetylation;Completeproteome;Cytoplasm;Directproteinsequencing;Lipid-binding;Phosphoprotein;Polymorphism;Referenceproteome;Transport	+		+	Control vs CFNT;Control vs CFT		Fatty acid-binding protein, heart	FABP3	P05413	P05413	FABPH_HUMAN	3	701130000	95	0.00245502	0.0208696	2.28939
22.3606	21.2896	21.2899	21.249	22.5645	21.3267	21.3316	22.7189	20.2987	19.0248	19.5863	19.4195	18.9937	18.9597	19.4684	19.4363	19.4985	19.2858	18.9145	20.1882	20.0252	19.9411	19.7179	21.3081	20.7297	21.0584	20.2072	cellular component organization;cellular component organization at cellular level;cellular component organization or biogenesis;cellular component organization or biogenesis at cellular level;cellular macromolecule metabolic process;cellular metabolic process;cellular process;cellular protein metabolic process;establishment of localization;establishment of localization in cell;establishment of pr…	binding;enzyme binding;GTPase binding;protein binding;Ral GTPase binding;Ras GTPase binding;small GTPase binding	cell part;cytoplasm;cytoplasmic part;cytosol;intracellular part		AAGCACA,MIR-218;ACAWYAAAG_UNKNOWN;ACTTTAT,MIR-142-5P;AGUIRRE_PANCREATIC_CANCER_COPY_NUMBER_UP;AMIT_EGF_RESPONSE_60_HELA;BENPORATH_SOX2_TARGETS;CAGCTG_V$AP4_Q5;CAGTGTT,MIR-141,MIR-200A;CATRRAGC_UNKNOWN;CATTGTYY_V$SOX9_B1;CELLULAR_LOCALIZATION;chr14q22;CTAGGAA,MIR-384;CTGAGCC,MIR-24;CTGTTAC,MIR-194;CTTTGTA,MIR-524;CYTOPLASM;DIAZ_CHRONIC_MEYLOGENOUS_LEUKEMIA_UP;ESTABLISHMENT_OF_CELLULAR_LOCALIZATION…	---	Acetylation;Coiledcoil;Completeproteome;Cytoplasm;Exocytosis;Phosphoprotein;Polymorphism;Proteintransport;Referenceproteome;Transport	+		+	Control vs CFNT;Control vs CFT	+	Exocyst complex component 5	EXOC5	O00471	O00471	EXOC5_HUMAN	3	69418000	12	1.86101e-08	0	2.34348
23.4952	23.0163	23.0131	23.5182	24.3277	23.4742	23.0311	24.1363	19.0042	22.1304	18.9153	18.9711	23.3836	22.6942	22.6287	21.518	19.82	22.4231	23.6474	18.7009	18.8321	23.2242	18.3473	22.4005	22.8217	20.6184	22.6845	cellular lipid metabolic process;cellular metabolic process;cellular process;establishment of localization;glycolipid metabolic process;glycolipid transport;glycosphingolipid metabolic process;lipid metabolic process;lipid transport;membrane lipid metabolic process;metabolic process;organic substance transport;primary metabolic process;small molecule metabolic process;sphingolipid metabolic proce…	binding;glycolipid binding;glycolipid transporter activity;lipid binding;lipid transporter activity;substrate-specific transporter activity;transporter activity	cell part;cytoplasmic part;cytosol;extracellular membrane-bounded organelle;extracellular organelle;extracellular region part;extracellular vesicular exosome;intracellular part;membrane;membrane-bounded organelle;membrane-bounded vesicle;organelle;vesicle		ACTGTGA,MIR-27A,MIR-27B;BEIER_GLIOMA_STEM_CELL_DN;BILD_HRAS_ONCOGENIC_SIGNATURE;BYSTRYKH_HEMATOPOIESIS_STEM_CELL_QTL_TRANS;CACTGTG,MIR-128A,MIR-128B;chr12q24;CREIGHTON_ENDOCRINE_THERAPY_RESISTANCE_5;DAIRKEE_TERT_TARGETS_UP;ESTABLISHMENT_OF_LOCALIZATION;FULCHER_INFLAMMATORY_RESPONSE_LECTIN_VS_LPS_UP;GAZDA_DIAMOND_BLACKFAN_ANEMIA_ERYTHROID_DN;GCM_DLG1;GCM_ERBB2IP;GCM_IL6ST;GCM_MAP4K4;GCM_PTK2;GCM_S…	---	3D-structure;Acetylation;Completeproteome;Cytoplasm;Lipidtransport;Referenceproteome;Repeat;Transport	+		+	Control vs CFNT;Control vs CFT		Glycolipid transfer protein	GLTP	Q9NZD2	Q9NZD2	GLTP_HUMAN	3	311120000	51	0.0035491	0.0228387	2.34844
24.3813	23.7819	23.6611	24.667	22.5407	24.8155	24.3329	22.4101	22.207	23.5797	19.796	19.1975	19.6527	23.1706	22.7013	19.5908	20.3552	22.616	19.9743	24.632	22.6995	19.5037	22.258	22.4707	23.2617	21.5522	23.1565			extracellular region		CAGGTG_V$E12_Q6;CHEN_METABOLIC_SYNDROM_NETWORK;chr4p15;CUI_TCF21_TARGETS_2_UP;DELACROIX_RAR_BOUND_ES;GGGTGGRR_V$PAX4_03;GSE14308_TH17_VS_NAIVE_CD4_TCELL_DN;GSE1460_CD4_THYMOCYTE_VS_NAIVE_CD4_TCELL_ADULT_BLOOD_DN;GSE1460_CD4_THYMOCYTE_VS_THYMIC_STROMAL_CELL_UP;GSE1460_DP_THYMOCYTE_VS_THYMIC_STROMAL_CELL_UP;GSE15215_CD2_POS_VS_NEG_PDC_UP;GSE22886_CD8_VS_CD4_NAIVE_TCELL_DN;GSE22886_NAIVE_CD4_TCELL_V…	NABA_CORE_MATRISOME_Yes	Completeproteome;Glycoprotein;Leucine-richrepeat;Polymorphism;Referenceproteome;Repeat;Secreted;Signal	+		+	Control vs CFNT;Control vs CFT		Leucine-rich repeat LGI family member 2	LGI2	Q8N0V4	Q8N0V4	LGI2_HUMAN	9	449440000	81	0.00412993	0.0221918	2.36772
25.6918	27.2008	24.3983	25.9964	25.1722	24.3975	24.9729	24.7086	23.9289	26.6241	22.5297	21.9353	19.7734	24.259	24.6885	22.6	19.5619	22.2814	23.2667	23.6021	23.9308	23.8202	23.3978	24.6394	24.563	22.2941	24.6425	anatomical structure development;axon guidance;biological adhesion;biological regulation;cell adhesion;cell surface receptor linked signaling pathway;cellular process;cellular response to stimulus;cerebellum development;chemotaxis;developmental process;locomotion;Notch signaling pathway;positive regulation of biological process;positive regulation of cell projection organization;positive regulati…	binding;carbohydrate binding	anchored to membrane;cell part;extracellular membrane-bounded organelle;extracellular organelle;extracellular region part;extracellular vesicular exosome;intrinsic to membrane;membrane;membrane part;membrane-bounded organelle;membrane-bounded vesicle;organelle;plasma membrane;vesicle	Cell adhesion molecules (CAMs)	AAAYRNCTG_UNKNOWN;AACTTT_UNKNOWN;BRUINS_UVC_RESPONSE_VIA_TP53_GROUP_A;CELL_FRACTION;CHEBOTAEV_GR_TARGETS_DN;chr12q11;CTAWWWATA_V$RSRFC4_Q2;ENK_UV_RESPONSE_KERATINOCYTE_DN;GGGCGGR_V$SP1_Q6;GRAESSMANN_APOPTOSIS_BY_DOXORUBICIN_DN;GSE1460_DP_THYMOCYTE_VS_THYMIC_STROMAL_CELL_UP;GSE17721_LPS_VS_CPG_16H_BMDM_DN;GSE20366_TREG_VS_NAIVE_CD4_TCELL_DN;GSE20715_WT_VS_TLR4_KO_LUNG_UP;GSE3337_CTRL_VS_4H_IFNG_IN…	---	3D-structure;Alternativesplicing;Celladhesion;Cellmembrane;Completeproteome;Directproteinsequencing;Disulfidebond;Glycoprotein;GPI-anchor;Immunoglobulindomain;Lipoprotein;Membrane;Notchsignalingpathway;Polymorphism;Referenceproteome;Repeat;Signal	+		+	Control vs CFNT;Control vs CFT		Contactin-1	CNTN1	Q12860	Q12860	CNTN1_HUMAN	19	1075500000	190	0.00531122	0.0249157	2.3964
23.1463	23.7105	23.4329	23.7697	22.9356	24.1124	23.4924	23.2799	19.763	22.9023	18.6494	20.4305	20.5169	23.1204	22.7554	19.7519	19.4978	22.0055	19.9408	23.3288	23.1052	20.1748	19.554	23.2681	22.9249	19.7578	23.5036	anatomical structure morphogenesis;biological adhesion;cell adhesion;cell communication;cell-matrix adhesion;cell-substrate adhesion;cellular process;craniofacial suture morphogenesis;developmental process	binding;carbohydrate binding;cation binding;ion binding;metal ion binding	basement membrane;cell part;extracellular matrix part;extracellular region part;integral to membrane;intrinsic to membrane;membrane part		AAAGGGA,MIR-204,MIR-211;AAGCACA,MIR-218;ACTGTAG,MIR-139;CCTGTGA,MIR-513;chr9p22;GSE13493_CD4INTCD8POS_VS_CD8POS_THYMOCYTE_UP;GSE17974_IL4_AND_ANTI_IL12_VS_UNTREATED_1H_ACT_CD4_TCELL_UP;GSE17974_IL4_AND_ANTI_IL12_VS_UNTREATED_24H_ACT_CD4_TCELL_UP;HOELZEL_NF1_TARGETS_DN;RIGGI_EWING_SARCOMA_PROGENITOR_UP;TAKEDA_TARGETS_OF_NUP98_HOXA9_FUSION_3D_UP;ZHENG_IL22_SIGNALING_UP	---	Alternativesplicing;Basementmembrane;Calcium;Celladhesion;Completeproteome;Craniosynostosis;Developmentalprotein;Diseasemutation;Disulfidebond;Extracellularmatrix;Glycoprotein;Lectin;Metal-binding;Polymorphism;Referenceproteome;Repeat;Secreted;Signal	+		+	Control vs CFNT;Control vs CFT		FRAS1-related extracellular matrix protein 1	FREM1	Q5H8C1	Q5H8C1	FREM1_HUMAN	16	328260000	60	0.000754949	0.0111304	2.42973
23.0852	23.0895	23.5708	23.4048	23.3773	22.9671	22.9094	23.7603	22.4959	18.8042	18.7964	22.7363	23.3401	23.0436	20.7842	20.015	18.9361	19.1763	19.1871	22.5903	22.8494	19.9286	19.5745	19.1289	19.823	19.4146	19.7322	biological regulation;cell surface receptor linked signaling pathway;cellular process;cellular response to stimulus;G-protein coupled receptor protein signaling pathway;regulation of biological process;regulation of cellular process;response to stimulus;signal transduction	amine binding;amino acid binding;binding;carboxylic acid binding;catalytic activity;cation binding;glutathione binding;G-protein coupled receptor activity;ion binding;lipoprotein particle receptor binding;low-density lipoprotein particle receptor binding;metal ion binding;modified amino acid binding;molecular transducer activity;peptide binding;protein binding;protein domain specific binding;rece…	cell part;cytoplasm;extracellular membrane-bounded organelle;extracellular organelle;extracellular region part;extracellular vesicular exosome;integral to membrane;integral to plasma membrane;intracellular membrane-bounded organelle;intracellular organelle;intracellular part;intrinsic to membrane;intrinsic to plasma membrane;membrane part;membrane-bounded organelle;membrane-bounded vesicle;nucleu…		ACEVEDO_LIVER_CANCER_UP;AKL_HTLV1_INFECTION_DN;BAELDE_DIABETIC_NEPHROPATHY_DN;BENPORATH_MYC_MAX_TARGETS;BLALOCK_ALZHEIMERS_DISEASE_DN;BMI1_DN.V1_DN;BOYAULT_LIVER_CANCER_SUBCLASS_G3_UP;BREDEMEYER_RAG_SIGNALING_NOT_VIA_ATM_DN;BUYTAERT_PHOTODYNAMIC_THERAPY_STRESS_DN;CELL_SURFACE_RECEPTOR_LINKED_SIGNAL_TRANSDUCTION_GO_0007166;CHICAS_RB1_TARGETS_SENESCENT;chr2q33;DANG_BOUND_BY_MYC;DIAZ_CHRONIC_MEYLOGE…	---	3D-structure;Acetylation;Completeproteome;Cytoplasm;Directproteinsequencing;Membrane;Metal-binding;Nucleus;Referenceproteome;Zinc	+		+	Control vs CFNT;Control vs CFT	+	LanC-like protein 1	LANCL1	O43813	O43813	LANC1_HUMAN	3	226170000	38	0.00193148	0.0177895	2.44508
22.3269	22.2755	22.4767	22.4721	22.7003	22.9282	22.4841	22.3602	19.7532	20.8261	22.694	19.5539	19.9691	21.2871	19.9537	19.0572	19.0106	19.8592	19.7361	18.936	19.1141	25.1158	20.0441	18.729	19.0326	20.0033	20.0824	anatomical structure development;ATP biosynthetic process;ATP metabolic process;ATP synthesis coupled proton transport;biosynthetic process;cation transport;cellular biosynthetic process;cellular metabolic process;cellular nitrogen compound biosynthetic process;cellular nitrogen compound metabolic process;cellular process;developmental process;electron transport chain;energy coupled proton transp…	cation transmembrane transporter activity;hydrogen ion transmembrane transporter activity;inorganic cation transmembrane transporter activity;ion transmembrane transporter activity;monovalent inorganic cation transmembrane transporter activity;substrate-specific transmembrane transporter activity;substrate-specific transporter activity;transmembrane transporter activity;transporter activity	cell part;cytoplasmic part;extracellular membrane-bounded organelle;extracellular organelle;extracellular region part;extracellular vesicular exosome;intracellular membrane-bounded organelle;intracellular organelle;intracellular organelle lumen;intracellular organelle part;intracellular part;macromolecular complex;membrane;membrane part;membrane-bounded organelle;membrane-bounded vesicle;membrane…	Alzheimer's disease;Huntington's disease;Oxidative phosphorylation;Parkinson's disease	ASTON_MAJOR_DEPRESSIVE_DISORDER_UP;BENPORATH_NANOG_TARGETS;BENPORATH_SOX2_TARGETS;BLALOCK_ALZHEIMERS_DISEASE_DN;CACGTG_V$MYC_Q2;chr1p13;CYTOPLASM;CYTOPLASMIC_PART;DANG_BOUND_BY_MYC;GCCATNTTG_V$YY1_Q6;GCM_ACTG1;GCM_APEX1;GCM_BECN1;GCM_CBFB;GCM_CSNK2B;GCM_DDX5;GCM_HDAC1;GCM_NPM1;GCM_PPP1CC;GCM_PSME1;GCM_TPT1;GNF2_DAP3;GNF2_XRCC5;GSE13484_UNSTIM_VS_YF17D_VACCINE_STIM_PBMC_UP;GSE14000_4H_VS_16H_LPS_D…	---	Acetylation;CF(0);Completeproteome;Hydrogeniontransport;Iontransport;Membrane;Mitochondrion;Mitochondrioninnermembrane;Polymorphism;Referenceproteome;Transitpeptide;Transport	+		+	Control vs CFNT;Control vs CFT	+	ATP synthase F(0) complex subunit B1, mitochondrial	ATP5F1	P24539	P24539	AT5F1_HUMAN	2	148220000	9	6.66677e-06	0	2.44999
22.8453	22.659	22.8922	22.5836	22.7533	25.4078	22.4229	22.5485	22.8904	22.4031	20.0459	21.8972	19.6969	21.9639	19.975	19.9677	19.5633	19.6131	18.7746	19.9408	19.2252	19.7501	19.4378	19.2103	20.1224	19.3427	19.2286	amine metabolic process;benzene-containing compound metabolic process;biological regulation;calcium-mediated signaling;carboxylic acid metabolic process;catabolic process;cellular amine metabolic process;cellular amino acid metabolic process;cellular aromatic compound metabolic process;cellular catabolic process;cellular detoxification of nitrogen compound;cellular ketone metabolic process;cellul…	amine binding;amino acid binding;binding;carboxylic acid binding;catalytic activity;enzyme binding;glutathione binding;glutathione transferase activity;identical protein binding;modified amino acid binding;peptide binding;protein binding;protein dimerization activity;protein homodimerization activity;receptor binding;transferase activity;transferase activity, transferring alkyl or aryl (other tha…	cell part;cytoplasm;cytoplasmic part;cytosol;endoplasmic reticulum;extracellular membrane-bounded organelle;extracellular organelle;extracellular region part;extracellular vesicular exosome;intracellular membrane-bounded organelle;intracellular organelle;intracellular part;membrane-bounded organelle;membrane-bounded vesicle;organelle;sarcoplasmic reticulum;vesicle	Drug metabolism - cytochrome P450;Glutathione metabolism;Metabolism of xenobiotics by cytochrome P450	BERENJENO_TRANSFORMED_BY_RHOA_DN;BOCHKIS_FOXA2_TARGETS;BRUINS_UVC_RESPONSE_VIA_TP53_GROUP_A;BURTON_ADIPOGENESIS_8;CHIANG_LIVER_CANCER_SUBCLASS_CTNNB1_UP;CHICAS_RB1_TARGETS_CONFLUENT;chr1p13;CHYLA_CBFA2T3_TARGETS_UP;DAVICIONI_MOLECULAR_ARMS_VS_ERMS_DN;DEURIG_T_CELL_PROLYMPHOCYTIC_LEUKEMIA_UP;DUTERTRE_ESTRADIOL_RESPONSE_24HR_DN;GAUSSMANN_MLL_AF4_FUSION_TARGETS_F_UP;GLUTATHIONE_TRANSFERASE_ACTIVITY;…	---	3D-structure;Alternativesplicing;Completeproteome;Cytoplasm;Directproteinsequencing;Polymorphism;Referenceproteome;Transferase	+		+	Control vs CFNT;Control vs CFT	+	Glutathione S-transferase Mu 2	GSTM2	P28161	P28161	GSTM2_HUMAN	6	207770000	13	0.000321864	0.00676923	2.45309
26.6804	24.2082	24.2204	26.3956	26.2547	25.7049	26.1001	22.4034	22.1889	23.5658	23.3196	22.8869	19.9057	24.1079	24.1663	22.669	20.6729	23.7537	23.4161	22.5311	23.1358	21.7591	23.9408	25.257	22.8069	21.6064	23.9495	cellular component organization;cellular component organization at cellular level;cellular component organization or biogenesis;cellular component organization or biogenesis at cellular level;cellular process;embryo implantation;extracellular matrix organization;extracellular structure organization;reproductive process;viral reproduction	binding;calcium ion binding;cation binding;enzyme activator activity;enzyme regulator activity;extracellular matrix structural constituent;ion binding;metal ion binding;peptidase activator activity;peptidase regulator activity;structural molecule activity	basement membrane;extracellular matrix;extracellular matrix part;extracellular membrane-bounded organelle;extracellular organelle;extracellular region;extracellular region part;extracellular space;extracellular vesicular exosome;membrane-bounded organelle;membrane-bounded vesicle;organelle;proteinaceous extracellular matrix;vesicle		BENPORATH_NANOG_TARGETS;BLALOCK_ALZHEIMERS_DISEASE_UP;BOQUEST_STEM_CELL_UP;BYSTRYKH_HEMATOPOIESIS_STEM_CELL_AND_BRAIN_QTL_TRANS;BYSTRYKH_HEMATOPOIESIS_STEM_CELL_QTL_TRANS;CELL_FRACTION;CHICAS_RB1_TARGETS_CONFLUENT;CHICAS_RB1_TARGETS_GROWING;chr22q13;CORRE_MULTIPLE_MYELOMA_DN;CTTTGT_V$LEF1_Q2;DAVICIONI_MOLECULAR_ARMS_VS_ERMS_DN;DELYS_THYROID_CANCER_DN;DOANE_RESPONSE_TO_ANDROGEN_DN;DURAND_STROMA_MA…	NABA_CORE_MATRISOME_Yes	Alternativesplicing;Calcium;Chromosomalrearrangement;Completeproteome;Directproteinsequencing;Disulfidebond;EGF-likedomain;Extracellularmatrix;Glycoprotein;Host-virusinteraction;Polymorphism;Referenceproteome;Repeat;Secreted;Signal	+		+	Control vs CFNT;Control vs CFT	+	Fibulin-1	FBLN1	P23142	P23142	FBLN1_HUMAN	12	1063100000	139	0.00100708	0.0121429	2.48064
25.2369	25.8373	24.5221	25.1934	25.037	26.9967	25.1004	25.1512	24.675	26.1421	22.5683	22.805	18.2285	23.5484	24.0625	18.5647	22.3379	23.7439	22.5843	24.6107	24.9676	22.9744	22.0499	24.4621	24.873	23.6282	24.3353	anatomical structure development;biological adhesion;biological regulation;cell adhesion;cell differentiation;cell surface receptor linked signaling pathway;cell-cell adhesion;cellular component assembly;cellular component assembly at cellular level;cellular component organization;cellular component organization at cellular level;cellular component organization or biogenesis;cellular component or…	binding;catalytic activity;cell adhesion molecule binding;hydrolase activity;hydrolase activity, acting on ester bonds;molecular transducer activity;phosphatase activity;phosphoprotein phosphatase activity;phosphoric ester hydrolase activity;protein binding;protein tyrosine phosphatase activity;receptor activity;receptor binding;signal transducer activity;signaling receptor activity;transmembrane…	cell part;extracellular membrane-bounded organelle;extracellular organelle;extracellular region part;extracellular vesicular exosome;integral to membrane;integral to plasma membrane;intrinsic to membrane;intrinsic to plasma membrane;membrane part;membrane-bounded organelle;membrane-bounded vesicle;organelle;plasma membrane part;vesicle		BAELDE_DIABETIC_NEPHROPATHY_DN;BIOPOLYMER_METABOLIC_PROCESS;BIOPOLYMER_MODIFICATION;BONOME_OVARIAN_CANCER_SURVIVAL_SUBOPTIMAL_DEBULKING;BOQUEST_STEM_CELL_CULTURED_VS_FRESH_UP;BOQUEST_STEM_CELL_UP;BOYLAN_MULTIPLE_MYELOMA_C_D_UP;BRCA1_DN.V1_UP;BROWNE_HCMV_INFECTION_10HR_UP;BROWNE_HCMV_INFECTION_18HR_DN;BROWNE_HCMV_INFECTION_20HR_UP;BROWNE_HCMV_INFECTION_48HR_DN;BRUINS_UVC_RESPONSE_LATE;BRUINS_UVC_R…	---	3D-structure;Alternativesplicing;Celladhesion;Completeproteome;Disulfidebond;Glycoprotein;Hydrolase;Immunoglobulindomain;Membrane;Polymorphism;Proteinphosphatase;Receptor;Referenceproteome;Repeat;Signal;Transmembrane;Transmembranehelix	+		+	Control vs CFNT;Control vs CFT		Receptor-type tyrosine-protein phosphatase S	PTPRS	Q13332;P23468	Q13332	PTPRS_HUMAN	20	1209700000	166	0.00809397	0.0306139	2.56176
26.506	24.0677	21.2772	25.0454	23.8384	26.5918	26.6447	25.3825	23.1314	21.5413	22.264	22.1286	18.5628	22.7858	21.9413	22.1867	22.9836	25.0383	22.6948	22.9092	25.9051	19.199	22.3585	22.8374	23.1557	20.8505	20.4975	anatomical structure development;anatomical structure formation involved in morphogenesis;anatomical structure morphogenesis;angiogenesis;axon guidance;biological adhesion;biological regulation;blood vessel endothelial cell migration;cAMP-mediated signaling;cell adhesion;cell development;cell maturation;cell migration;cell migration involved in sprouting angiogenesis;cell motility;cell projection…	adenyl nucleotide binding;adenyl ribonucleotide binding;ATP binding;binding;catalytic activity;ephrin receptor activity;GPI-linked ephrin receptor activity;kinase activity;molecular transducer activity;nucleotide binding;phosphotransferase activity, alcohol group as acceptor;protein kinase activity;protein tyrosine kinase activity;purine nucleotide binding;purine ribonucleoside triphosphate bindi…	axon;cell body;cell part;cell projection;cytoplasmic part;cytosol;dendrite;early endosome membrane;endoplasmic reticulum;endosomal part;endosome membrane;external side of plasma membrane;extracellular membrane-bounded organelle;extracellular organelle;extracellular region;extracellular region part;extracellular vesicular exosome;integral to membrane;integral to plasma membrane;intracellular membr…	Axon guidance	AACTTT_UNKNOWN;AAGCACA,MIR-218;ACAGGGT,MIR-10A,MIR-10B;ACEVEDO_METHYLATED_IN_LIVER_CANCER_DN;AMIT_EGF_RESPONSE_120_HELA;ANATOMICAL_STRUCTURE_DEVELOPMENT;ANATOMICAL_STRUCTURE_MORPHOGENESIS;ASTON_MAJOR_DEPRESSIVE_DISORDER_DN;BENPORATH_EED_TARGETS;BENPORATH_ES_WITH_H3K27ME3;BENPORATH_PRC2_TARGETS;BENPORATH_SUZ12_TARGETS;BIOPOLYMER_METABOLIC_PROCESS;BIOPOLYMER_MODIFICATION;BOQUEST_STEM_CELL_DN;BOYAUL…	---	3D-structure;Alternativesplicing;Angiogenesis;ATP-binding;Celladhesion;Cellmembrane;Cellprojection;Completeproteome;Developmentalprotein;Disulfidebond;Endosome;Glycoprotein;Kinase;Membrane;Neurogenesis;Nucleotide-binding;Phosphoprotein;Polymorphism;Receptor;Referenceproteome;Repeat;Signal;Transferase;Transmembrane;Transmembranehelix;Tyrosine-proteinkinase;Ublconjugation	+		+	Control vs CFNT;Control vs CFT		Ephrin type-B receptor 4	EPHB4	P54760;P29322;P54756	P54760	EPHB4_HUMAN	9	910500000	93	0.00280531	0.0205957	2.5719
24.6233	24.2317	23.1019	23.6589	22.9648	24.7302	24.201	24.8113	18.6195	23.9197	19.7315	24.5781	19.8468	20.5853	23.857	17.7319	22.5758	19.3283	23.3699	23.4685	18.8567	19.5362	24.6047	24.3333	19.3796	23.9606	20.0421	amine metabolic process;amine transport;amino acid transport;carboxylic acid metabolic process;carboxylic acid transport;cellular amine metabolic process;cellular amino acid metabolic process;cellular aromatic compound metabolic process;cellular component organization;cellular component organization or biogenesis;cellular ketone metabolic process;cellular membrane organization;cellular metabolic …	amine binding;amino acid binding;binding;carboxylic acid binding;cofactor transporter activity;folic acid binding;folic acid transporter activity;receptor activity;transmembrane transporter activity;transporter activity;vitamin binding;vitamin transporter activity	anchored to external side of plasma membrane;anchored to membrane;anchored to plasma membrane;apical plasma membrane;brush border membrane;cell part;cell projection membrane;cell projection part;cell surface;clathrin-coated vesicle;coated vesicle;cytoplasmic membrane-bounded vesicle;cytoplasmic part;cytoplasmic vesicle;endosome;extracellular membrane-bounded organelle;extracellular organelle;extr…	Endocytosis	BASAKI_YBX1_TARGETS_DN;CELL_FRACTION;chr11q13;COFACTOR_TRANSPORT;DELACROIX_RAR_BOUND_ES;DELYS_THYROID_CANCER_DN;ENK_UV_RESPONSE_KERATINOCYTE_UP;ERB2_UP.V1_DN;ESTABLISHMENT_OF_LOCALIZATION;FERRANDO_TAL1_NEIGHBORS;FULCHER_INFLAMMATORY_RESPONSE_LECTIN_VS_LPS_UP;FURUKAWA_DUSP6_TARGETS_PCI35_UP;GAJATE_RESPONSE_TO_TRABECTEDIN_UP;GGGTGGRR_V$PAX4_03;GLI1_UP.V1_DN;GRAESSMANN_APOPTOSIS_BY_DOXORUBICIN_UP;GR…	---	3D-structure;Cellmembrane;Completeproteome;Cytoplasmicvesicle;Directproteinsequencing;Disulfidebond;Endosome;Folate-binding;Glycoprotein;GPI-anchor;Lipoprotein;Membrane;Neurodegeneration;Polymorphism;Receptor;Referenceproteome;Secreted;Signal;Transport	+		+	Control vs CFNT;Control vs CFT		Folate receptor alpha	FOLR1	P15328	P15328	FOLR1_HUMAN	2	517190000	46	0.0090972	0.033283	2.5727
23.4003	24.0429	23.2427	23.1297	23.8685	22.8524	22.894	23.3038	22.9732	23.1014	19.1067	23.0953	20.1502	21.1791	19.7562	19.7578	20.4632	19.5009	19.8033	19.8372	20.1131	20.1929	18.452	20.0699	23.1542	18.5318	21.432	2'-deoxyribonucleotide biosynthetic process;2'-deoxyribonucleotide metabolic process;benzene-containing compound metabolic process;biosynthetic process;carboxylic acid metabolic process;CDP biosynthetic process;CDP metabolic process;cellular aromatic compound metabolic process;cellular biosynthetic process;cellular ketone metabolic process;cellular metabolic process;cellular nitrogen compound bio…	adenyl nucleotide binding;adenyl ribonucleotide binding;ATP binding;binding;catalytic activity;cytidylate kinase activity;kinase activity;nucleobase-containing compound kinase activity;nucleoside diphosphate kinase activity;nucleoside kinase activity;nucleotide binding;nucleotide kinase activity;phosphotransferase activity, phosphate group as acceptor;purine nucleotide binding;purine ribonucleosi…	cell part;cytoplasm;cytoplasmic part;cytosol;extracellular membrane-bounded organelle;extracellular organelle;extracellular region part;extracellular vesicular exosome;intracellular membrane-bounded organelle;intracellular non-membrane-bounded organelle;intracellular organelle;intracellular organelle part;intracellular part;membrane-bounded organelle;membrane-bounded vesicle;non-membrane-bounded …	Pyrimidine metabolism	ACCATTT,MIR-522;BIOSYNTHETIC_PROCESS;CACTTTG,MIR-520G,MIR-520H;CELLULAR_BIOSYNTHETIC_PROCESS;CHARAFE_BREAST_CANCER_LUMINAL_VS_BASAL_DN;chr1p34;CREIGHTON_ENDOCRINE_THERAPY_RESISTANCE_3;CTTTGT_V$LEF1_Q2;CYTOPLASM;DIAZ_CHRONIC_MEYLOGENOUS_LEUKEMIA_UP;FIRESTEIN_PROLIFERATION;GAGCCTG,MIR-484;GCACTTT,MIR-17-5P,MIR-20A,MIR-106A,MIR-106B,MIR-20B,MIR-519D;GCATTTG,MIR-105;GCTTGAA,MIR-498;GEORGES_TARGETS_OF…	---	3D-structure;Acetylation;Alternativesplicing;ATP-binding;Completeproteome;Cytoplasm;Directproteinsequencing;Kinase;Nucleotide-binding;Nucleus;Phosphoprotein;Pyrimidinebiosynthesis;Referenceproteome;Transferase	+		+	Control vs CFNT;Control vs CFT	+	UMP-CMP kinase	CMPK1	P30085	P30085	KCY_HUMAN	5	274340000	31	0.000148876	0.00514286	2.61476
29.9399	30.6582	28.6641	29.7647	29.1641	29.4517	30.2536	28.9586	28.6514	28.3404	27.2868	24.9669	22.266	27.6913	29.0933	26.5747	24.0771	28.2548	27.7577	28.9402	29.051	28.7817	27.012	29.575	28.4049	26.6017	28.7519	anatomical structure development;anatomical structure morphogenesis;biological adhesion;biological regulation;branching involved in ureteric bud morphogenesis;branching morphogenesis of a tube;cell adhesion;cell differentiation;cell projection organization;cell-cell adhesion;cellular component organization;cellular component organization at cellular level;cellular component organization or biogen…	binding;calcium ion binding;cation binding;ion binding;metal ion binding	apical part of cell;cell part;extracellular membrane-bounded organelle;extracellular organelle;extracellular region part;extracellular vesicular exosome;integral to membrane;intrinsic to membrane;membrane;membrane part;membrane-bounded organelle;membrane-bounded vesicle;organelle;plasma membrane;vesicle		ATF2_S_UP.V1_UP;BONOME_OVARIAN_CANCER_POOR_SURVIVAL_UP;BONOME_OVARIAN_CANCER_SURVIVAL_SUBOPTIMAL_DEBULKING;CAIRO_HEPATOBLASTOMA_CLASSES_DN;CATTGTYY_V$SOX9_B1;CHARAFE_BREAST_CANCER_LUMINAL_VS_MESENCHYMAL_DN;chr4q28;CLAUS_PGR_POSITIVE_MENINGIOMA_UP;DAVICIONI_MOLECULAR_ARMS_VS_ERMS_DN;DURAND_STROMA_MAX_UP;DUTERTRE_ESTRADIOL_RESPONSE_24HR_DN;GAUSSMANN_MLL_AF4_FUSION_TARGETS_C_UP;GSE13229_IMM_VS_MATUR…	---	Alternativesplicing;Calcium;Celladhesion;Completeproteome;Deafness;Diseasemutation;Disulfidebond;EGF-likedomain;Glycoprotein;Membrane;Mentalretardation;Phosphoprotein;Polymorphism;Referenceproteome;Repeat;Signal;Transmembrane;Transmembranehelix	+		+	Control vs CFNT;Control vs CFT		Protocadherin Fat 4	FAT4	Q6V0I7	Q6V0I7	FAT4_HUMAN	98	20056000000	2140	0.00386875	0.0224262	2.61515
25.9115	24.8525	23.6652	25.5428	25.3871	26.0815	26.3513	24.616	25.1	23.6893	18.7887	20.2371	20.2133	22.8665	24.2176	22.1325	21.4829	24.1572	24.2335	24.7794	24.1508	19.0809	23.3218	23.9139	24.2923	22.853	22.6929	biological adhesion;calcium-dependent cell-cell adhesion;cell adhesion;cell-cell adhesion;cellular process;homophilic cell adhesion	binding;calcium ion binding;cation binding;ion binding;metal ion binding	basolateral plasma membrane;cell part;extracellular membrane-bounded organelle;extracellular organelle;extracellular region part;extracellular vesicular exosome;integral to membrane;intrinsic to membrane;membrane part;membrane-bounded organelle;membrane-bounded vesicle;organelle;plasma membrane part;vesicle		AKT_UP.V1_DN;AKT_UP_MTOR_DN.V1_DN;BAKKER_FOXO3_TARGETS_DN;BROWNE_HCMV_INFECTION_48HR_DN;CAGGTA_V$AREB6_01;CAGGTG_V$E12_Q6;CAIRO_LIVER_DEVELOPMENT_UP;chr16q21;CTIP_DN.V1_DN;DAZARD_RESPONSE_TO_UV_NHEK_UP;DCA_UP.V1_DN;DELYS_THYROID_CANCER_DN;ENK_UV_RESPONSE_KERATINOCYTE_UP;FONTAINE_FOLLICULAR_THYROID_ADENOMA_UP;FONTAINE_PAPILLARY_THYROID_CARCINOMA_DN;FORTSCHEGGER_PHF8_TARGETS_DN;GSE27786_LIN_NEG_VS_…	---	Alternativesplicing;Calcium;Celladhesion;Cellmembrane;Completeproteome;Glycoprotein;Membrane;Metal-binding;Polymorphism;Referenceproteome;Repeat;Signal;Transmembrane;Transmembranehelix	+		+	Control vs CFNT;Control vs CFT		Cadherin-16	CDH16	O75309	O75309	CAD16_HUMAN	18	1006800000	215	0.0033062	0.0215849	2.64281
28.6628	25.9731	25.6614	28.885	27.5503	29.3666	28.4008	28.0784	27.8251	23.4348	20.0451	24.6237	23.0436	25.212	25.3088	26.8029	25.3066	27.6682	27.0445	25.6905	29.5965	24.4048	26.5201	25.4336	23.3027	25.3375	24.2012	anatomical structure development;axon guidance;biological adhesion;cell adhesion;cellular component disassembly;cellular component disassembly at cellular level;cellular component organization;cellular component organization at cellular level;cellular component organization or biogenesis;cellular component organization or biogenesis at cellular level;cellular process;chemotaxis;collagen catabolic…	endopeptidase inhibitor activity;endopeptidase regulator activity;enzyme inhibitor activity;enzyme regulator activity;peptidase inhibitor activity;peptidase regulator activity;serine-type endopeptidase inhibitor activity	anchoring collagen;cell part;collagen;collagen type VI;cytoplasmic part;endoplasmic reticulum lumen;endoplasmic reticulum part;extracellular matrix;extracellular matrix part;extracellular membrane-bounded organelle;extracellular organelle;extracellular region;extracellular region part;extracellular space;extracellular vesicular exosome;intracellular organelle lumen;intracellular organelle part;in…	ECM-receptor interaction;Focal adhesion;Protein digestion and absorption	AFFAR_YY1_TARGETS_DN;ANASTASSIOU_CANCER_MESENCHYMAL_TRANSITION_SIGNATURE;ANATOMICAL_STRUCTURE_DEVELOPMENT;BERENJENO_TRANSFORMED_BY_RHOA_DN;BLALOCK_ALZHEIMERS_DISEASE_UP;BOQUEST_STEM_CELL_UP;BROWNE_HCMV_INFECTION_24HR_DN;BRUINS_UVC_RESPONSE_LATE;CAMP_UP.V1_UP;CHARAFE_BREAST_CANCER_LUMINAL_VS_MESENCHYMAL_DN;CHEN_METABOLIC_SYNDROM_NETWORK;CHIANG_LIVER_CANCER_SUBCLASS_CTNNB1_DN;chr2q37;CLASPER_LYMPHA…	NABA_CORE_MATRISOME_Yes	3D-structure;Alternativesplicing;Celladhesion;Collagen;Completeproteome;Directproteinsequencing;Diseasemutation;Disulfidebond;Extracellularmatrix;Glycoprotein;Hydroxylation;Phosphoprotein;Polymorphism;Proteaseinhibitor;Pyrrolidonecarboxylicacid;Referenceproteome;Repeat;Secreted;Serineproteaseinhibitor;Signal	+		+	Control vs CFNT;Control vs CFT		Collagen alpha-3(VI) chain	COL6A3	P12111	P12111	CO6A3_HUMAN	22	6682200000	418	0.0073131	0.0285957	2.65515
24.7999	22.6554	22.9779	23.7648	27.0059	24.5652	23.6958	26.3926	21.2443	21.648	21.9817	22.7761	23.5266	22.0659	22.2985	21.0537	19.9408	22.8357	24.5278	17.8742	23.2926	20.6535	20.9955	20.2231	21.5504	24.4713	20.6446			cell part;cytoplasm;extracellular membrane-bounded organelle;extracellular organelle;extracellular region part;extracellular vesicular exosome;intracellular part;membrane-bounded organelle;membrane-bounded vesicle;organelle;vesicle		BECKER_TAMOXIFEN_RESISTANCE_UP;BROWNE_HCMV_INFECTION_30MIN_DN;CAHOY_OLIGODENDROCUTIC;CHANDRAN_METASTASIS_DN;CHARAFE_BREAST_CANCER_LUMINAL_VS_BASAL_UP;CHARAFE_BREAST_CANCER_LUMINAL_VS_MESENCHYMAL_UP;chr20q13;CREIGHTON_ENDOCRINE_THERAPY_RESISTANCE_3;CREIGHTON_ENDOCRINE_THERAPY_RESISTANCE_5;DODD_NASOPHARYNGEAL_CARCINOMA_UP;DUTERTRE_ESTRADIOL_RESPONSE_24HR_DN;FOSTER_KDM1A_TARGETS_UP;FRASOR_RESPONSE_T…	---	Alternativesplicing;Completeproteome;Cytoplasm;Phosphoprotein;Polymorphism;Referenceproteome	+		+	Control vs CFNT;Control vs CFT	+	Breast carcinoma-amplified sequence 1	BCAS1	O75363	O75363	BCAS1_HUMAN	14	582450000	111	0.00240493	0.019	2.66774
27.7967	26.473	23.9558	27.6275	27.4991	27.8498	28.5804	27.3431	26.9504	26.4499	21.147	22.2611	20.6852	24.6125	24.1818	24.4141	24.221	26.9958	25.2932	26.1023	28.4334	20.9817	21.8841	23.7568	25.1949	25.5246	24.3699	biological adhesion;calcium-dependent cell-cell adhesion;cell adhesion;cell-cell adhesion;cellular process;homophilic cell adhesion	binding;calcium ion binding;cation binding;ion binding;metal ion binding	cell part;extracellular membrane-bounded organelle;extracellular organelle;extracellular region part;extracellular vesicular exosome;integral to membrane;intrinsic to membrane;membrane;membrane part;membrane-bounded organelle;membrane-bounded vesicle;organelle;plasma membrane;vesicle		AACTTT_UNKNOWN;ABE_INNER_EAR;ACEVEDO_LIVER_CANCER_WITH_H3K27ME3_DN;ATATGCA,MIR-448;BANDRES_RESPONSE_TO_CARMUSTIN_MGMT_48HR_DN;CHEN_HOXA5_TARGETS_9HR_DN;chr5q31;CTTTGA_V$LEF1_Q2;GGGACCA,MIR-133A,MIR-133B;GSE13411_IGM_MEMORY_BCELL_VS_PLASMA_CELL_UP;GSE22886_NEUTROPHIL_VS_DC_UP;GSE2706_R848_VS_LPS_2H_STIM_DC_UP;GSE36476_CTRL_VS_TSST_ACT_72H_MEMORY_CD4_TCELL_OLD_UP;LIM_MAMMARY_STEM_CELL_UP;MODULE_126…	---	Alternativesplicing;Calcium;Celladhesion;Cellmembrane;Completeproteome;Glycoprotein;Membrane;Referenceproteome;Repeat;Signal;Transmembrane;Transmembranehelix	+		+	Control vs CFNT;Control vs CFT		Protocadherin gamma-C3	PCDHGC3	Q9UN70	Q9UN70	PCDGK_HUMAN	19	4015300000	336	0.00579097	0.0252346	2.69782
27.665	25.4696	26.3941	28.0526	27.2001	29.2963	28.7337	26.1606	26.7581	20.0941	23.7576	26.0172	22.4941	24.3138	23.9005	24.6292	23.6801	27.1826	25.6074	27.1357	23.547	22.8385	23.1051	22.8107	24.9904	21.1788	26.3617	acute inflammatory response;acute-phase response;anatomical structure development;biological regulation;cellular component organization;cellular component organization or biogenesis;cellular membrane organization;cellular process;defense response;developmental process;endocytosis;establishment of localization;inflammatory response;membrane invagination;membrane organization;multicellular organism…	cysteine-type endopeptidase inhibitor activity;endopeptidase inhibitor activity;endopeptidase regulator activity;enzyme inhibitor activity;enzyme regulator activity;kinase inhibitor activity;kinase regulator activity;peptidase inhibitor activity;peptidase regulator activity	blood microparticle;extracellular membrane-bounded organelle;extracellular organelle;extracellular region;extracellular region part;extracellular space;extracellular vesicular exosome;membrane-bounded organelle;membrane-bounded vesicle;organelle;vesicle		ABBUD_LIF_SIGNALING_1_UP;ACUTE_INFLAMMATORY_RESPONSE;ANATOMICAL_STRUCTURE_DEVELOPMENT;BOCHKIS_FOXA2_TARGETS;BONE_REMODELING;BRUINS_UVC_RESPONSE_VIA_TP53_GROUP_A;CAIRO_LIVER_DEVELOPMENT_DN;CAR_IGFBP1;chr3q27;DANG_BOUND_BY_MYC;DEFENSE_RESPONSE;ESTABLISHMENT_OF_LOCALIZATION;FERNANDEZ_BOUND_BY_MYC;GNF2_HPN;GNF2_HPX;GNF2_LCAT;GNF2_TST;GSE12845_IGD_NEG_BLOOD_VS_PRE_GC_TONSIL_BCELL_UP;GSE12845_IGD_POS_B…	---	Completeproteome;Directproteinsequencing;Disulfidebond;Glycoprotein;Mineralbalance;Phosphoprotein;Polymorphism;Referenceproteome;Repeat;Secreted;Signal	+		+	Control vs CFNT;Control vs CFT	+	Alpha-2-HS-glycoprotein;Alpha-2-HS-glycoprotein chain A;Alpha-2-HS-glycoprotein chain B	AHSG	P02765	P02765	FETUA_HUMAN	6	4624300000	208	0.00403535	0.0228	2.74063
23.0283	23.2155	23.1525	23.4414	23.9957	24.2088	22.5721	23.4529	18.113	24.4801	19.7469	18.8259	22.8112	21.3367	22.88	20.1811	20.0618	20.4599	20.0195	18.5126	19.5742	19.6135	18.7991	21.9802	23.1467	24.5321	20.5724	alcohol catabolic process;alcohol metabolic process;amine catabolic process;amine metabolic process;behavior;benzene-containing compound metabolic process;biological regulation;biosynthetic process;catabolic process;catecholamine catabolic process;catecholamine metabolic process;catechol-containing compound catabolic process;catechol-containing compound metabolic process;cell communication;cell-c…	binding;catalytic activity;catechol O-methyltransferase activity;cation binding;ion binding;magnesium ion binding;metal ion binding;methyltransferase activity;O-methyltransferase activity;S-adenosylmethionine-dependent methyltransferase activity;transferase activity;transferase activity, transferring one-carbon groups	axon;cell body;cell part;cell projection;cell projection part;cytoplasmic part;cytosol;dendritic spine;extracellular membrane-bounded organelle;extracellular organelle;extracellular region part;extracellular vesicular exosome;integral to membrane;intracellular membrane-bounded organelle;intracellular organelle;intracellular part;intrinsic to membrane;membrane;membrane part;membrane-bounded organe…	Betalain biosynthesis;Steroid hormone biosynthesis;Tyrosine metabolism	BLALOCK_ALZHEIMERS_DISEASE_UP;BYSTRYKH_HEMATOPOIESIS_STEM_CELL_AND_BRAIN_QTL_TRANS;BYSTRYKH_HEMATOPOIESIS_STEM_CELL_QTL_TRANS;CELL_FRACTION;chr22q11;COATES_MACROPHAGE_M1_VS_M2_UP;COLDREN_GEFITINIB_RESISTANCE_DN;DIAZ_CHRONIC_MEYLOGENOUS_LEUKEMIA_UP;ENK_UV_RESPONSE_KERATINOCYTE_UP;FARMER_BREAST_CANCER_APOCRINE_VS_LUMINAL;FLECHNER_BIOPSY_KIDNEY_TRANSPLANT_OK_VS_DONOR_UP;FLECHNER_BIOPSY_KIDNEY_TRANSP…	---	3D-structure;Alternativeinitiation;Catecholaminemetabolism;Cellmembrane;Completeproteome;Cytoplasm;Directproteinsequencing;Magnesium;Membrane;Metal-binding;Methyltransferase;Neurotransmitterdegradation;Polymorphism;Referenceproteome;S-adenosyl-L-methionine;Signal-anchor;Transferase;Transmembrane;Transmembranehelix	+		+	Control vs CFNT;Control vs CFT		Catechol O-methyltransferase	COMT	P21964	P21964	COMT_HUMAN	5	327330000	33	0.000991965	0.0121667	2.76435
23.5973	23.6793	23.5833	23.3391	24.2417	23.6126	22.8974	24.2836	22.3966	22.0002	19.1863	22.8701	19.1369	23.0696	23.0533	19.0282	19.3287	18.4226	19.4225	22.2816	22.0611	20.8949	19.1294	19.8882	22.5245	19.2939	20.8212	activation of immune response;activation of innate immune response;activation of MAPKK activity;activation of protein kinase activity;axon guidance;behavior;behavioral interaction between organisms;biological regulation;blood coagulation;cell migration;cell motility;cell surface receptor linked signaling pathway;cellular component movement;cellular macromolecule metabolic process;cellular metabol…	binding;GDP binding;GMP binding;GTP binding;guanyl nucleotide binding;guanyl ribonucleotide binding;nucleotide binding;protein binding;protein complex binding;purine nucleotide binding;purine ribonucleoside triphosphate binding;purine ribonucleotide binding;ribonucleotide binding	adherens junction;anchoring junction;cell junction;cell part;cell-substrate adherens junction;cell-substrate junction;cytoplasm;cytoplasmic part;cytosol;extrinsic to internal side of plasma membrane;extrinsic to membrane;extrinsic to plasma membrane;focal adhesion;intracellular membrane-bounded organelle;intracellular organelle;intracellular part;membrane;membrane part;membrane raft;membrane-boun…	Acute myeloid leukemia;Aldosterone-regulated sodium reabsorption;Axon guidance;B cell receptor signaling pathway;Bladder cancer;Chemokine signaling pathway;Chronic myeloid leukemia;Colorectal cancer;Dorso-ventral axis formation;Endometrial cancer;ErbB signaling pathway;Fc epsilon RI signaling pathway;Gap junction;Glioma;GnRH signaling pathway;Hepatitis C;Insulin signaling pathway;Long-term depres…	AACTTT_UNKNOWN;ABE_VEGFA_TARGETS_30MIN;ACCATTT,MIR-522;ACTGAAA,MIR-30A-3P,MIR-30E-3P;AGCATTA,MIR-155;ATAGGAA,MIR-202;ATATGCA,MIR-448;ATGCAGT,MIR-217;BENPORATH_CYCLING_GENES;BIOCARTA_TEL_PATHWAY;BOYLAN_MULTIPLE_MYELOMA_C_CLUSTER_UP;BRUECKNER_TARGETS_OF_MIRLET7A3_UP;BRUNEAU_SEPTATION_VENTRICULAR;CAGGTG_V$E12_Q6;CAGTATT,MIR-200B,MIR-200C,MIR-429;CHICAS_RB1_TARGETS_SENESCENT;chr12p12;CREIGHTON_ENDOCR…	---	3D-structure;Acetylation;Alternativesplicing;Cardiomyopathy;Cellmembrane;Completeproteome;Cytoplasm;Deafness;Directproteinsequencing;Diseasemutation;Ectodermaldysplasia;GTP-binding;Lipoprotein;Membrane;Mentalretardation;Methylation;Nucleotide-binding;Palmitate;Polymorphism;Prenylation;Proto-oncogene;Referenceproteome;S-nitrosylation	+		+	Control vs CFNT;Control vs CFT	+	GTPase KRas;GTPase KRas, N-terminally processed	KRAS	P01116	P01116	RASK_HUMAN	6	306230000	35	0.000663799	0.0105882	2.80456
26.0178	26.092	23.2977	25.3203	24.3281	24.9316	25.0184	26.6484	24.2243	19.1397	21.1421	23.7524	19.2847	22.8592	25.4686	23.7926	21.2632	19.3979	23.7963	23.5138	24.6787	20.1373	23.7428	19.7729	23.7535	18.958	24.1746		catalytic activity;endopeptidase activity;hydrolase activity;peptidase activity;peptidase activity, acting on L-amino acid peptides;serine hydrolase activity;serine-type endopeptidase activity;serine-type peptidase activity	cell part;extracellular membrane-bounded organelle;extracellular organelle;extracellular region part;extracellular vesicular exosome;intracellular membrane-bounded organelle;intracellular organelle;intracellular part;membrane-bounded organelle;membrane-bounded vesicle;nucleus;organelle;vesicle	Endocrine and other factor-regulated calcium reabsorption	ACEVEDO_METHYLATED_IN_LIVER_CANCER_DN;BOHN_PRIMARY_IMMUNODEFICIENCY_SYNDROM_UP;CAGCTG_V$AP4_Q5;CAGGTG_V$E12_Q6;chr19q13;CTIP_DN.V1_UP;ENDOPEPTIDASE_ACTIVITY;ENK_UV_RESPONSE_KERATINOCYTE_UP;GCANCTGNY_V$MYOD_Q6;GSE10325_BCELL_VS_LUPUS_BCELL_UP;GSE12366_GC_BCELL_VS_PLASMA_CELL_DN;GSE1460_CD4_THYMOCYTE_VS_NAIVE_CD4_TCELL_ADULT_BLOOD_DN;GSE29618_LAIV_VS_TIV_FLU_VACCINE_DAY7_MDC_DN;GSE29618_PRE_VS_DAY7…	---	3D-structure;Alternativesplicing;Completeproteome;Directproteinsequencing;Disulfidebond;Glycoprotein;Hydrolase;Polymorphism;Protease;Referenceproteome;Serineprotease;Signal;Zymogen	+		+	Control vs CFNT;Control vs CFT		Kallikrein-1	KLK1	P06870	P06870	KLK1_HUMAN	4	887500000	105	0.00265945	0.0189268	2.9039
24.3759	24.2382	22.8889	24.6643	24.2765	25.1648	24.7537	24.4095	23.425	23.9226	19.306	19.1194	19.9155	21.7433	22.9062	19.9617	20.2124	23.0747	20.1725	23.2254	24.7886	18.4434	19.6079	22.72	22.8791	19.1505	20.798	anatomical structure development;biological adhesion;cell adhesion;cell-cell adhesion;cellular process;developmental process;homophilic cell adhesion;nervous system development;system development	binding;calcium ion binding;cation binding;ion binding;metal ion binding	cell part;extracellular region;integral to membrane;integral to plasma membrane;intrinsic to membrane;intrinsic to plasma membrane;membrane;membrane part;plasma membrane;plasma membrane part		AAGCACA,MIR-218;ACCAATC,MIR-509;AGCACTT,MIR-93,MIR-302A,MIR-302B,MIR-302C,MIR-302D,MIR-372,MIR-373,MIR-520E,MIR-520A,MIR-526B,MIR-520B,MIR-520C,MIR-520D;AGGGCAG,MIR-18A;ANATOMICAL_STRUCTURE_DEVELOPMENT;ATGTAGC,MIR-221,MIR-222;ATTCTTT,MIR-186;CACTTTG,MIR-520G,MIR-520H;CAGCACT,MIR-512-3P;CAGCTTT,MIR-320;CAGGTG_V$E12_Q6;chr5q31;CTIP_DN.V1_UP;GCACTTT,MIR-17-5P,MIR-20A,MIR-106A,MIR-106B,MIR-20B,MIR-51…	---	Alternativesplicing;Calcium;Celladhesion;Cellmembrane;Completeproteome;Glycoprotein;Membrane;Polymorphism;Referenceproteome;Repeat;Secreted;Signal;Transmembrane;Transmembranehelix	+		+	Control vs CFNT;Control vs CFT	+	Protocadherin alpha-6;Protocadherin alpha-8	PCDHA6;PCDHA8	Q9UN73;Q9Y5H6;Q9Y5H7;Q9Y5I3	Q9UN73;Q9Y5H6	PCDA6_HUMAN	10	478270000	68	0.000367941	0.00727273	2.93108
22.6167	22.6266	22.9402	22.6279	22.833	23.1822	22.2078	22.8373	18.4876	21.8372	19.2046	19.3452	20.5118	19.3479	19.5504	19.7261	19.1718	19.2115	20.489	18.5733	18.6195	20.2631	18.9199	19.7709	19.6401	20.5776	18.2977	biological adhesion;biological regulation;cell activation;cell adhesion;cell-cell adhesion;cellular process;cellular response to stimulus;homotypic cell-cell adhesion;intracellular signal transduction;negative regulation of biological process;negative regulation of cell migration;negative regulation of cell motility;negative regulation of cellular component movement;negative regulation of cellula…	binding;GDP binding;GTP binding;guanyl nucleotide binding;guanyl ribonucleotide binding;nucleotide binding;purine nucleotide binding;purine ribonucleoside triphosphate binding;purine ribonucleotide binding;ribonucleotide binding	cell junction;cell part;cell-cell contact zone;cell-cell junction;cytoplasmic part;cytosol;endosomal part;endosome membrane;extracellular membrane-bounded organelle;extracellular organelle;extracellular region part;extracellular vesicular exosome;intracellular organelle part;intracellular part;membrane;membrane part;membrane raft;membrane-bounded organelle;membrane-bounded vesicle;occluding junct…		AACTTT_UNKNOWN;AMIT_SERUM_RESPONSE_120_MCF10A;BENPORATH_MYC_MAX_TARGETS;BERTUCCI_MEDULLARY_VS_DUCTAL_BREAST_CANCER_UP;BIOCARTA_PLCE_PATHWAY;BOSCO_ALLERGEN_INDUCED_TH2_ASSOCIATED_MODULE;BRUINS_UVC_RESPONSE_MIDDLE;BYSTRYKH_HEMATOPOIESIS_STEM_CELL_QTL_TRANS;CAGCTG_V$AP4_Q5;CASORELLI_ACUTE_PROMYELOCYTIC_LEUKEMIA_DN;CHEN_METABOLIC_SYNDROM_NETWORK;chr3q25;CTAWWWATA_V$RSRFC4_Q2;DANG_BOUND_BY_MYC;DIAZ_CH…	---	3D-structure;Completeproteome;Endosome;GTP-binding;Lipoprotein;Membrane;Methylation;Nucleotide-binding;Palmitate;Prenylation;Referenceproteome	+		+	Control vs CFNT;Control vs CFT	+	Ras-related protein Rap-2b	RAP2B	P61225	P61225	RAP2B_HUMAN	5	117440000	11	3.78864e-08	0	3.1126
30.1842	26.7042	26.9171	28.811	27.8179	29.0505	30.4397	28.3357	26.3899	23.5418	24.1421	23.0831	22.9144	26.0071	25.7185	26.01	24.9335	27.3073	27.2868	26.4597	24.6653	22.9668	25.7038	25.9649	24.969	23.723	24.3833	biological regulation;cell surface receptor linked signaling pathway;cellular component organization;cellular component organization at cellular level;cellular component organization or biogenesis;cellular component organization or biogenesis at cellular level;cellular macromolecule metabolic process;cellular metabolic process;cellular process;cellular protein metabolic process;cellular response …	binding;calcium ion binding;catalytic activity;cation binding;epidermal growth factor receptor binding;epidermal growth factor-activated receptor activity;growth factor receptor binding;ion binding;kinase activity;metal ion binding;molecular transducer activity;phosphotransferase activity, alcohol group as acceptor;protein binding;protein kinase activity;protein tyrosine kinase activity;receptor …	extracellular matrix;extracellular membrane-bounded organelle;extracellular organelle;extracellular region;extracellular region part;extracellular space;extracellular vesicular exosome;membrane-bounded organelle;membrane-bounded vesicle;organelle;proteinaceous extracellular matrix;vesicle		AFFAR_YY1_TARGETS_UP;AKT_UP.V1_DN;AKT_UP_MTOR_DN.V1_DN;ATF2_S_UP.V1_DN;ATF2_UP.V1_DN;ATTCTTT,MIR-186;BCAT.100_UP.V1_UP;BLALOCK_ALZHEIMERS_DISEASE_INCIPIENT_UP;BLALOCK_ALZHEIMERS_DISEASE_UP;BOGNI_TREATMENT_RELATED_MYELOID_LEUKEMIA_UP;BONOME_OVARIAN_CANCER_POOR_SURVIVAL_UP;BONOME_OVARIAN_CANCER_SURVIVAL_SUBOPTIMAL_DEBULKING;BOQUEST_STEM_CELL_UP;BROWNE_HCMV_INFECTION_48HR_DN;BRUECKNER_TARGETS_OF_MIR…	NABA_CORE_MATRISOME_Yes	Alternativesplicing;Calcium;Completeproteome;Diseasemutation;Disulfidebond;EGF-likedomain;Extracellularmatrix;Glycoprotein;Growthfactor;Polymorphism;Referenceproteome;Repeat;Secreted;Signal	+		+	Control vs CFNT;Control vs CFT	+	EGF-containing fibulin-like extracellular matrix protein 1	EFEMP1	Q12805	Q12805	FBLN3_HUMAN	16	10019000000	557	0.000169724	0.004	3.21635
27.3169	26.9207	25.9649	25.8047	25.7182	25.5981	27.6144	24.7712	19.3938	21.144	19.2484	19.4083	20.2665	23.4156	26.0649	19.5408	20.2115	26.4585	19.3613	20.6724	19.2166	22.0858	18.9113	27.2731	22.4552	19.5504	21.1783	carbohydrate catabolic process;carbohydrate metabolic process;catabolic process;digestion;metabolic process;multicellular organismal process;polysaccharide digestion;primary metabolic process;small molecule metabolic process	alpha-amylase activity;amylase activity;anion binding;binding;calcium ion binding;catalytic activity;cation binding;chloride ion binding;hydrolase activity;hydrolase activity, acting on glycosyl bonds;hydrolase activity, hydrolyzing O-glycosyl compounds;ion binding;metal ion binding	extracellular membrane-bounded organelle;extracellular organelle;extracellular region;extracellular region part;extracellular space;extracellular vesicular exosome;membrane-bounded organelle;membrane-bounded vesicle;organelle;vesicle	Carbohydrate digestion and absorption;Starch and sucrose metabolism	ACEVEDO_FGFR1_TARGETS_IN_PROSTATE_CANCER_MODEL_DN;BERGER_MBD2_TARGETS;BORLAK_LIVER_CANCER_EGF_UP;CAMPS_COLON_CANCER_COPY_NUMBER_DN;chr1p21;CTTTAAR_UNKNOWN;EXTRACELLULAR_REGION;EXTRACELLULAR_REGION_PART;EXTRACELLULAR_SPACE;FEVR_CTNNB1_TARGETS_UP;GSE13229_IMM_VS_INTMATURE_NKCELL_DN;GSE14308_INDUCED_VS_NATURAL_TREG_DN;GSE17721_CPG_VS_GARDIQUIMOD_12H_BMDM_UP;GSE32423_IL7_VS_IL7_IL4_MEMORY_CD8_TCELL_U…	---	3D-structure;Alternativesplicing;Calcium;Carbohydratemetabolism;Chloride;Completeproteome;Disulfidebond;Glycoprotein;Glycosidase;Hydrolase;Metal-binding;Pyrrolidonecarboxylicacid;Referenceproteome;Secreted;Signal	+		+	Control vs CFNT;Control vs CFT	+	Pancreatic alpha-amylase	AMY2A	P04746	P04746	AMY1_HUMAN	27	1862900000	116	7.48299e-05	0	4.94814
25.1439	22.7203	23.844	24.6835	24.4961	26.2977	25.7126	25.0109	25.2296	22.748	22.9341	23.6327	20.0383	23.4031	22.0125	19.6737	24.4164	23.9526	24.2037	24.2412	24.4434	18.5176	22.9136	23.0561	22.5192	19.9009	22.9347	axon guidance;biological regulation;cell surface receptor linked signaling pathway;cellular process;cellular response to stimulus;chemotaxis;enzyme linked receptor protein signaling pathway;ephrin receptor signaling pathway;locomotion;regulation of biological process;regulation of cellular process;response to chemical stimulus;response to external stimulus;response to stimulus;signal transduction…	adenyl nucleotide binding;adenyl ribonucleotide binding;ATP binding;binding;catalytic activity;ephrin receptor activity;kinase activity;molecular transducer activity;nucleotide binding;phosphotransferase activity, alcohol group as acceptor;protein kinase activity;protein tyrosine kinase activity;purine nucleotide binding;purine ribonucleoside triphosphate binding;purine ribonucleotide binding;rec…	cell part;cytoplasmic part;cytosol;extracellular region;integral to membrane;integral to plasma membrane;intracellular part;intrinsic to membrane;intrinsic to plasma membrane;membrane;membrane part;plasma membrane;plasma membrane part	Axon guidance	AAAGGGA,MIR-204,MIR-211;ACEVEDO_FGFR1_TARGETS_IN_PROSTATE_CANCER_MODEL_DN;BROWNE_HCMV_INFECTION_18HR_DN;CAGGTG_V$E12_Q6;CATTGTYY_V$SOX9_B1;CHANDRAN_METASTASIS_DN;CHIARETTI_T_ALL_REFRACTORY_TO_THERAPY;chr7q33;CSR_LATE_UP.V1_DN;DCA_UP.V1_UP;ENK_UV_RESPONSE_EPIDERMIS_DN;FONTAINE_FOLLICULAR_THYROID_ADENOMA_UP;GAUSSMANN_MLL_AF4_FUSION_TARGETS_D_UP;GCNP_SHH_UP_LATE.V1_DN;GGGAGGRR_V$MAZ_Q6;GGGCGGR_V$SP1…	---	Alternativesplicing;ATP-binding;Completeproteome;Directproteinsequencing;Glycoprotein;Membrane;Nucleotide-binding;Polymorphism;Receptor;Referenceproteome;Repeat;Secreted;Signal;Transmembrane;Transmembranehelix			+	Control vs CFT		Ephrin type-B receptor 6	EPHB6	O15197	O15197	EPHB6_HUMAN	9	705560000	71	0.0237584	0.081224	1.69813
25.1462	26.3952	24.8134	24.6153	25.3382	25.0624	24.5725	24.9521	24.2044	27.4258	25.8399	24.1568	25.9932	23.9395	25.5483	23.8453	24.4493	24.7023	25.0164	24.6885	26.7797	26.7096	25.9365	25.1991	25.8416	25.8545	25.879	amine biosynthetic process;amine metabolic process;anatomical structure development;aspartate family amino acid metabolic process;biological regulation;biosynthetic process;brain development;carboxylic acid biosynthetic process;carboxylic acid metabolic process;cell cycle arrest;cell cycle process;cell development;cell projection organization;cellular amine metabolic process;cellular amino acid b…	binding;catalytic activity;coenzyme binding;cofactor binding;electron carrier activity;NAD binding;nucleotide binding;oxidoreductase activity;oxidoreductase activity, acting on CH-OH group of donors;oxidoreductase activity, acting on the CH-OH group of donors, NAD or NADP as acceptor;phosphoglycerate dehydrogenase activity	cell part;cytoplasmic part;cytosol;extracellular membrane-bounded organelle;extracellular organelle;extracellular region part;extracellular vesicular exosome;intracellular part;membrane-bounded organelle;membrane-bounded vesicle;organelle;vesicle	Glycine, serine and threonine metabolism;Methane metabolism	ACEVEDO_LIVER_CANCER_DN;ACEVEDO_LIVER_CANCER_WITH_H3K27ME3_DN;ACEVEDO_LIVER_TUMOR_VS_NORMAL_ADJACENT_TISSUE_DN;ACEVEDO_NORMAL_TISSUE_ADJACENT_TO_LIVER_TUMOR_DN;ANATOMICAL_STRUCTURE_DEVELOPMENT;BENPORATH_NANOG_TARGETS;BENPORATH_OCT4_TARGETS;BLUM_RESPONSE_TO_SALIRASIB_UP;BRAIN_DEVELOPMENT;BRUINS_UVC_RESPONSE_VIA_TP53_GROUP_D;BYSTRYKH_HEMATOPOIESIS_STEM_CELL_QTL_TRANS;CENTRAL_NERVOUS_SYSTEM_DEVELOPM…	---	3D-structure;Acetylation;Amino-acidbiosynthesis;Completeproteome;Directproteinsequencing;Diseasemutation;NAD;Oxidoreductase;Phosphoprotein;Referenceproteome;Serinebiosynthesis			+	Control vs CFT		D-3-phosphoglycerate dehydrogenase	PHGDH	O43175	O43175	SERA_HUMAN	11	1977800000	229	0.758859	0.887902	0.127771
24.111	24.3934	24.3693	24.5291	24.1485	24.3983	24.5483	24.3027	24.3943	23.6745	22.6267	22.9059	18.727	24.1867	24.5027	23.5937	23.4764	23.016	23.675	23.841	23.2058	20.379	23.6467	24.0452	24.2684	19.7151	19.7761	anion homeostasis;anion transport;bicarbonate transport;biological regulation;cellular metabolic process;cellular process;chemical homeostasis;chloride ion homeostasis;establishment of localization;homeostatic process;inorganic anion transport;ion homeostasis;ion transport;metabolic process;monovalent inorganic anion homeostasis;one-carbon metabolic process;organic anion transport;regulation of b…	binding;carbonate dehydratase activity;carbon-oxygen lyase activity;catalytic activity;cation binding;hydro-lyase activity;ion binding;lyase activity;metal ion binding;transition metal ion binding;zinc ion binding	cell part;integral to membrane;intrinsic to membrane;membrane;membrane part;plasma membrane	Nitrogen metabolism	AACTTT_UNKNOWN;ACTGTGA,MIR-27A,MIR-27B;AZARE_NEOPLASTIC_TRANSFORMATION_BY_STAT3_DN;BASAKI_YBX1_TARGETS_DN;BHAT_ESR1_TARGETS_NOT_VIA_AKT1_UP;BHAT_ESR1_TARGETS_VIA_AKT1_UP;BILD_SRC_ONCOGENIC_SIGNATURE;BROWNE_HCMV_INFECTION_18HR_DN;BROWNE_HCMV_INFECTION_24HR_DN;BROWNE_HCMV_INFECTION_48HR_DN;CACTGTG,MIR-128A,MIR-128B;CARBON_OXYGEN_LYASE_ACTIVITY;CARBONATE_DEHYDRATASE_ACTIVITY;CATION_BINDING;CHARAFE_B…	---	3D-structure;Alternativesplicing;Completeproteome;Diseasemutation;Disulfidebond;Glycoprotein;Lyase;Membrane;Metal-binding;Referenceproteome;Signal;Transmembrane;Transmembranehelix;Zinc			+	Control vs CFT		Carbonic anhydrase 12	CA12	O43570	O43570	CAH12_HUMAN	4	625880000	95	0.0530804	0.158354	1.13175
20.2187	19.2531	18.978	19.288	20.3503	22.2525	19.2687	19.1266	21.7525	23.5103	19.4593	19.4926	19.6635	21.9684	19.0748	18.5121	20.7077	21.9746	19.9083	21.8567	22.3525	22.3938	21.9876	21.8795	21.8174	22.0667	22.4624	anion transport;biological regulation;cellular localization;cellular macromolecule localization;cellular macromolecule metabolic process;cellular metabolic process;cellular process;cellular protein localization;cellular protein metabolic process;cellular response to chemical stimulus;cellular response to organic substance;cellular response to stimulus;cellular response to stress;cellular response…	adenyl nucleotide binding;adenyl ribonucleotide binding;anion transmembrane transporter activity;arsenite transmembrane transporter activity;ATP binding;ATPase activity;binding;catalytic activity;cation binding;hydrolase activity;hydrolase activity, acting on acid anhydrides;hydrolase activity, acting on acid anhydrides, in phosphorus-containing anhydrides;inorganic anion transmembrane transporte…	cell part;cytoplasm;cytoplasmic part;endoplasmic reticulum membrane;endoplasmic reticulum part;extracellular membrane-bounded organelle;extracellular organelle;extracellular region part;extracellular vesicular exosome;intracellular membrane-bounded organelle;intracellular non-membrane-bounded organelle;intracellular organelle;intracellular organelle part;intracellular part;membrane;membrane part;…		ALCALAY_AML_BY_NPM1_LOCALIZATION_DN;ANION_TRANSMEMBRANE_TRANSPORTER_ACTIVITY;BENPORATH_SOX2_TARGETS;BERENJENO_TRANSFORMED_BY_RHOA_UP;BLALOCK_ALZHEIMERS_DISEASE_DN;CACGTG_V$MYC_Q2;CELL_FRACTION;chr19p13;CYCLIN_D1_UP.V1_DN;CYTAGCAAY_UNKNOWN;CYTOPLASM;DACOSTA_UV_RESPONSE_VIA_ERCC3_TTD_UP;DACOSTA_UV_RESPONSE_VIA_ERCC3_UP;DIAZ_CHRONIC_MEYLOGENOUS_LEUKEMIA_UP;ESTABLISHMENT_OF_LOCALIZATION;GRADE_COLON_C…	---	Acetylation;ATP-binding;Completeproteome;Cytoplasm;Endoplasmicreticulum;Hydrolase;Metal-binding;Nucleotide-binding;Nucleus;Polymorphism;Referenceproteome;Transport;Zinc			+	Control vs CFT		ATPase ASNA1	ASNA1	O43681	O43681	ASNA_HUMAN	2	112470000	28	0.211261	0.387833	-0.814743
26.1718	23.1567	24.6307	25.0175	26.7888	24.9003	24.4556	25.8479	23.3545	22.6982	22.7582	22.3398	26.0892	24.5807	23.2853	24.11	19.0017	25.1441	23.9577	20.0477	23.7376	22.5062	24.7416	20.0131	22.9116	24.4133	23.3131	adult behavior;adult locomotory behavior;aggressive behavior;behavior;behavioral interaction between organisms;biological regulation;cell communication;cell-cell signaling;cellular component organization;cellular component organization or biogenesis;cellular process;cellular response to abiotic stimulus;cellular response to chemical stimulus;cellular response to hydrostatic pressure;cellular resp…		axon part;axon terminus;cell body;cell part;cell projection part;cytoplasm;cytoplasmic part;cytoskeletal part;extracellular membrane-bounded organelle;extracellular organelle;extracellular region part;extracellular vesicular exosome;intracellular non-membrane-bounded organelle;intracellular organelle;intracellular organelle part;intracellular part;membrane;membrane-bounded organelle;membrane-boun…		ACAWYAAAG_UNKNOWN;ACOSTA_PROLIFERATION_INDEPENDENT_MYC_TARGETS_DN;BANDRES_RESPONSE_TO_CARMUSTIN_WITHOUT_MGMT_48HR_UP;BLALOCK_ALZHEIMERS_DISEASE_DN;CAGCTG_V$AP4_Q5;chr10q23;CTTTGT_V$LEF1_Q2;FRASOR_RESPONSE_TO_ESTRADIOL_DN;GOUYER_TATI_TARGETS_DN;GRAESSMANN_APOPTOSIS_BY_DOXORUBICIN_UP;GRAESSMANN_RESPONSE_TO_MC_AND_DOXORUBICIN_UP;GSE17721_CTRL_VS_LPS_6H_BMDM_DN;GSE17721_CTRL_VS_PAM3CSK4_4H_BMDM_DN;GS…	---	Completeproteome;Cytoplasm;Cytoskeleton;Phosphoprotein;Polymorphism;Referenceproteome;Repeat			+	Control vs CFT		Gamma-synuclein	SNCG	O76070	O76070	SYUG_HUMAN	8	862180000	132	0.0197093	0.0657888	2.00723
24.2013	22.3802	21.9147	23.1712	22.6781	23.8487	22.8471	22.8986	20.1321	25.3036	19.4612	22.469	20.81	18.4484	20.0572	21.4676	19.8367	22.1682	19.9459	23.3661	18.7601	19.7012	21.8488	22.642	23.7491	19.3394	21.8174	activation of immune response;biological regulation;complement activation;complement activation, classical pathway;defense response;humoral immune response;immune effector process;immune response;immune system process;innate immune response;macromolecule metabolic process;metabolic process;positive regulation of biological process;positive regulation of immune response;positive regulation of immu…	binding;calcium ion binding;catalytic activity;cation binding;endopeptidase activity;hydrolase activity;ion binding;metal ion binding;peptidase activity;peptidase activity, acting on L-amino acid peptides;serine hydrolase activity;serine-type endopeptidase activity;serine-type peptidase activity	blood microparticle;extracellular membrane-bounded organelle;extracellular organelle;extracellular region;extracellular region part;extracellular vesicular exosome;membrane-bounded organelle;membrane-bounded vesicle;organelle;vesicle	Complement and coagulation cascades;Phagosome;Staphylococcus aureus infection;Systemic lupus erythematosus	ACEVEDO_FGFR1_TARGETS_IN_PROSTATE_CANCER_MODEL_DN;AKT_UP.V1_DN;AKT_UP_MTOR_DN.V1_DN;BAELDE_DIABETIC_NEPHROPATHY_DN;BERENJENO_TRANSFORMED_BY_RHOA_DN;BIOCARTA_CLASSIC_PATHWAY;BIOCARTA_COMP_PATHWAY;BLALOCK_ALZHEIMERS_DISEASE_UP;BOCHKIS_FOXA2_TARGETS;BOQUEST_STEM_CELL_UP;BRACHAT_RESPONSE_TO_CAMPTOTHECIN_UP;CAIRO_HEPATOBLASTOMA_CLASSES_DN;CAIRO_HEPATOBLASTOMA_DN;CHARAFE_BREAST_CANCER_LUMINAL_VS_BASAL_…	---	3D-structure;Complementpathway;Completeproteome;Directproteinsequencing;Disulfidebond;EGF-likedomain;Glycoprotein;Hydrolase;Hydroxylation;Immunity;Innateimmunity;Phosphoprotein;Polymorphism;Protease;Referenceproteome;Repeat;Serineprotease;Signal;Sushi			+	Control vs CFT		Complement C1r subcomponent;Complement C1r subcomponent heavy chain;Complement C1r subcomponent light chain	C1R	P00736	P00736	C1R_HUMAN	11	360270000	59	0.0179727	0.0642038	1.87031
28.2766	27.2412	27.0217	26.6564	27.3273	27.8159	27.0371	28.0696	25.4535	26.3962	25.9538	25.6601	19.6554	27.5263	27.6591	26.752	26.3471	25.2727	26.2957	26.921	24.8296	25.9462	25.3922	27.2521	24.7747	25.6297	25.9368	biological regulation;blood coagulation;cell migration;cell motility;cellular component movement;cellular process;cellular response to stimulus;chemotaxis;coagulation;fibrinolysis;hemostasis;locomotion;macromolecule metabolic process;metabolic process;multicellular organismal process;muscle cell migration;negative regulation of biological process;negative regulation of blood coagulation;negative …	catalytic activity;endopeptidase activity;hydrolase activity;peptidase activity;peptidase activity, acting on L-amino acid peptides;serine hydrolase activity;serine-type endopeptidase activity;serine-type peptidase activity	adherens junction;anchoring junction;cell junction;cell part;cell surface;cell-substrate adherens junction;cell-substrate junction;extracellular membrane-bounded organelle;extracellular organelle;extracellular region;extracellular region part;extracellular space;extracellular vesicular exosome;focal adhesion;membrane;membrane-bounded organelle;membrane-bounded vesicle;organelle;plasma membrane;ve…	Complement and coagulation cascades	AATGTGA,MIR-23A,MIR-23B;ACEVEDO_METHYLATED_IN_LIVER_CANCER_DN;ALFANO_MYC_TARGETS;AMIT_EGF_RESPONSE_240_MCF10A;AMIT_EGF_RESPONSE_480_HELA;ANASTASSIOU_CANCER_MESENCHYMAL_TRANSITION_SIGNATURE;ATF2_S_UP.V1_UP;ATF2_UP.V1_UP;BEHAVIOR;BILD_MYC_ONCOGENIC_SIGNATURE;BIOCARTA_FIBRINOLYSIS_PATHWAY;BIOCARTA_PLATELETAPP_PATHWAY;BROWNE_HCMV_INFECTION_14HR_DN;BROWNE_HCMV_INFECTION_8HR_DN;BUYTAERT_PHOTODYNAMIC_TH…	---	3D-structure;Alternativesplicing;Bloodcoagulation;Completeproteome;Directproteinsequencing;Disulfidebond;EGF-likedomain;Fibrinolysis;Glycoprotein;Hemostasis;Hydrolase;Kringle;Pharmaceutical;Phosphoprotein;Plasminogenactivation;Polymorphism;Protease;Referenceproteome;Secreted;Serineprotease;Signal;Zymogen			+	Control vs CFT		Urokinase-type plasminogen activator;Urokinase-type plasminogen activator long chain A;Urokinase-type plasminogen activator short chain A;Urokinase-type plasminogen activator chain B	PLAU	P00749	P00749	UROK_HUMAN	10	4914200000	297	0.0488271	0.128471	1.60632
32.0347	31.4407	31.3299	32.6165	31.7841	33.4694	31.8327	32.0595	32.7959	31.5118	29.4173	29.6223	27.9288	30.3213	30.7859	30.0132	31.1938	31.8367	31.5024	31.0884	32.4722	28.8756	30.8506	30.5589	31.0695	30.3633	30.0275	biological regulation;blood coagulation;blood coagulation, intrinsic pathway;calcium ion homeostasis;cation homeostasis;cell activation;cellular calcium ion homeostasis;cellular cation homeostasis;cellular chemical homeostasis;cellular divalent inorganic cation homeostasis;cellular homeostasis;cellular ion homeostasis;cellular metal ion homeostasis;cellular process;chemical homeostasis;circulator…	binding;carbohydrate binding;cation binding;cysteine-type endopeptidase inhibitor activity;endopeptidase inhibitor activity;endopeptidase regulator activity;enzyme inhibitor activity;enzyme regulator activity;glycosaminoglycan binding;heparin binding;ion binding;metal ion binding;pattern binding;peptidase inhibitor activity;peptidase regulator activity;polysaccharide binding;protein binding;recep…	blood microparticle;cell part;cytoplasmic membrane-bounded vesicle lumen;cytoplasmic part;cytoplasmic vesicle part;extracellular membrane-bounded organelle;extracellular organelle;extracellular region;extracellular region part;extracellular space;extracellular vesicular exosome;intracellular organelle part;intracellular part;membrane;membrane-bounded organelle;membrane-bounded vesicle;membrane-en…	Complement and coagulation cascades	ABBUD_LIF_SIGNALING_1_UP;ACEVEDO_LIVER_CANCER_DN;BIOCARTA_BIOPEPTIDES_PATHWAY;BIOCARTA_INTRINSIC_PATHWAY;BIOCARTA_LAIR_PATHWAY;BIOCARTA_NO1_PATHWAY;BLOOD_COAGULATION;BOCHKIS_FOXA2_TARGETS;BODY_FLUID_SECRETION;BOYAULT_LIVER_CANCER_SUBCLASS_G3_DN;BROWNE_HCMV_INFECTION_14HR_UP;BROWNE_HCMV_INFECTION_24HR_UP;CAIRO_LIVER_DEVELOPMENT_DN;CATION_HOMEOSTASIS;CELLULAR_CATION_HOMEOSTASIS;CELLULAR_HOMEOSTASIS…	---	3D-structure;Alternativesplicing;Bloodcoagulation;Completeproteome;Directproteinsequencing;Disulfidebond;Glycoprotein;Hemostasis;Hydroxylation;Inflammatoryresponse;Phosphoprotein;Polymorphism;Proteaseinhibitor;Pyrrolidonecarboxylicacid;Referenceproteome;Repeat;Secreted;Signal;Thiolproteaseinhibitor;Vasoactive;Vasodilator			+	Control vs CFT		Kininogen-1;Kininogen-1 heavy chain;T-kinin;Bradykinin;Lysyl-bradykinin;Kininogen-1 light chain;Low molecular weight growth-promoting factor	KNG1	P01042	P01042	KNG1_HUMAN	31	127570000000	2058	0.0120556	0.0612329	1.40279
24.6404	24.8931	23.3847	25.4401	24.3372	24.2002	23.9167	24.4895	24.5273	25.9914	27.2035	24.8314	24.5463	25.5122	25.07	26.116	25.2009	25.507	24.4783	24.5973	26.6381	27.0785	25.9394	25.4188	26.1233	23.8377	26.094	adaptive immune response;anatomical structure homeostasis;antibacterial humoral response;antimicrobial humoral response;biological regulation;defense response;defense response to bacterium;glomerular filtration;homeostatic process;humoral immune response;immune response;immune system process;innate immune response;multicellular organismal process;multi-organism process;positive regulation of biol…	antigen binding;binding;identical protein binding;IgA binding;immunoglobulin binding;protein binding;protein complex binding;protein dimerization activity;protein homodimerization activity	blood microparticle;dimeric IgA immunoglobulin complex;extracellular membrane-bounded organelle;extracellular organelle;extracellular region;extracellular region part;extracellular space;extracellular vesicular exosome;IgA immunoglobulin complex;IgA immunoglobulin complex, circulating;IgM immunoglobulin complex;IgM immunoglobulin complex, circulating;immunoglobulin complex;immunoglobulin complex,…		ACEVEDO_FGFR1_TARGETS_IN_PROSTATE_CANCER_MODEL_UP;ACEVEDO_LIVER_CANCER_UP;BASSO_CD40_SIGNALING_DN;BOSCO_ALLERGEN_INDUCED_TH2_ASSOCIATED_MODULE;BOYLAN_MULTIPLE_MYELOMA_PCA1_UP;CHIARETTI_ACUTE_LYMPHOBLASTIC_LEUKEMIA_ZAP70;chr4q21;CROONQUIST_NRAS_SIGNALING_UP;CROONQUIST_NRAS_VS_STROMAL_STIMULATION_UP;CROONQUIST_STROMAL_STIMULATION_DN;DEMAGALHAES_AGING_UP;DEURIG_T_CELL_PROLYMPHOCYTIC_LEUKEMIA_UP;FARM…	---	Completeproteome;Directproteinsequencing;Disulfidebond;Glycoprotein;Pyrrolidonecarboxylicacid;Referenceproteome;Secreted;Signal			+	Control vs CFT		Immunoglobulin J chain	IGJ	P01591	P01591	IGJ_HUMAN	3	1658000000	129	0.0188066	0.103431	-0.885729
23.7321	22.3857	21.9934	25.3399	24.922	23.4444	23.5226	21.743	20.4194	19.5346	24.8654	23.7014	18.6795	24.9761	22.0997	25.5971	24.1668	18.5055	20.9292	24.6939	19.4336	23.9057	18.7459	23.0931	20.5246	19.6846	20.4442	activation of immune response;biological regulation;complement activation;complement activation, classical pathway;defense response;humoral immune response;immune effector process;immune response;immune system process;innate immune response;macromolecule metabolic process;metabolic process;negative regulation of biological process;negative regulation of cell differentiation;negative regulation of…		blood microparticle;collagen;extracellular matrix part;extracellular membrane-bounded organelle;extracellular organelle;extracellular region;extracellular region part;extracellular space;extracellular vesicular exosome;membrane-bounded organelle;membrane-bounded vesicle;organelle;vesicle	Chagas disease (American trypanosomiasis);Complement and coagulation cascades;Prion diseases;Staphylococcus aureus infection;Systemic lupus erythematosus	BIOCARTA_CLASSIC_PATHWAY;BIOCARTA_COMP_PATHWAY;CAGGTG_V$E12_Q6;CHEN_METABOLIC_SYNDROM_NETWORK;chr1p36;CHUNG_BLISTER_CYTOTOXICITY_UP;COATES_MACROPHAGE_M1_VS_M2_DN;CRX_DN.V1_DN;DEMAGALHAES_AGING_UP;GGGAGGRR_V$MAZ_Q6;GSE15659_TREG_VS_TCONV_UP;GSE17721_CTRL_VS_PAM3CSK4_24H_BMDM_UP;GSE17721_CTRL_VS_POLYIC_6H_BMDM_UP;GSE17721_CTRL_VS_POLYIC_8H_BMDM_UP;GSE17721_PAM3CSK4_VS_GADIQUIMOD_16H_BMDM_DN;GSE1772…	---	3D-structure;Collagen;Complementpathway;Completeproteome;Directproteinsequencing;Diseasemutation;Disulfidebond;Glycoprotein;Hydroxylation;Immunity;Innateimmunity;Referenceproteome;Repeat;Secreted;Signal			+	Control vs CFT		Complement C1q subcomponent subunit C	C1QC	P02747	P02747	C1QC_HUMAN	3	430390000	64	0.318219	0.500511	1.038
25.1614	23.1281	23.2019	23.577	23.4994	25.4118	24.1133	23.2949	23.595	23.0934	22.7086	23.2646	20.563	22.959	22.7785	23.1268	19.2073	22.6411	24.3776	22.9142	23.2666	19.2305	22.2412	18.3902	19.7953	22.1739	19.7868	alcohol biosynthetic process;alcohol metabolic process;anatomical structure development;anatomical structure formation involved in morphogenesis;anatomical structure homeostasis;anatomical structure morphogenesis;apocarotenoid metabolic process;biological regulation;biosynthetic process;carbohydrate biosynthetic process;carbohydrate homeostasis;carbohydrate metabolic process;cardiac muscle tissue…	binding;isoprenoid binding;lipid binding;retinal binding;retinoid binding;retinol binding;retinol transporter activity;transmembrane transporter activity;transporter activity;vitamin binding;vitamin transporter activity	cell part;cytoplasmic part;cytosol;extracellular membrane-bounded organelle;extracellular organelle;extracellular region;extracellular region part;extracellular space;extracellular vesicular exosome;intracellular part;macromolecular complex;membrane-bounded organelle;membrane-bounded vesicle;organelle;protein complex;vesicle		BAUS_TFF2_TARGETS_DN;BENPORATH_EED_TARGETS;BENPORATH_ES_WITH_H3K27ME3;BENPORATH_PRC2_TARGETS;BENPORATH_SUZ12_TARGETS;BERTUCCI_INVASIVE_CARCINOMA_DUCTAL_VS_LOBULAR_DN;BMI1_DN_MEL18_DN.V1_DN;BRCA1_DN.V1_DN;BROWNE_HCMV_INFECTION_48HR_UP;BRUINS_UVC_RESPONSE_VIA_TP53_GROUP_B;CADWELL_ATG16L1_TARGETS_UP;CAR_HPX;CHEMNITZ_RESPONSE_TO_PROSTAGLANDIN_E2_DN;chr10q23;CORRE_MULTIPLE_MYELOMA_DN;CRX_DN.V1_DN;CRX_…	---	3D-structure;Completeproteome;Directproteinsequencing;Diseasemutation;Disulfidebond;Referenceproteome;Retinol-binding;Secreted;Sensorytransduction;Signal;Transport;Vision;VitaminA			+	Control vs CFT	+	Retinol-binding protein 4;Plasma retinol-binding protein(1-182);Plasma retinol-binding protein(1-181);Plasma retinol-binding protein(1-179);Plasma retinol-binding protein(1-176)	RBP4	P02753	P02753	RET4_HUMAN	6	446610000	55	0.0287252	0.102009	1.32105
25.3284	26.0849	26.1002	26.4365	25.1322	25.2641	24.2959	25.8931	27.3301	26.9344	25.0171	27.2405	26.1272	26.838	27.3273	27.7117	24.1178	26.9201	25.5889	25.6222	26.1978	26.1469	26.3422	27.3685	28.9187	26.4828	27.381	biological regulation;cation homeostasis;cation transport;cellular cation homeostasis;cellular chemical homeostasis;cellular component organization;cellular component organization or biogenesis;cellular homeostasis;cellular ion homeostasis;cellular iron ion homeostasis;cellular membrane organization;cellular metal ion homeostasis;cellular process;chemical homeostasis;endocytosis;establishment of …	binding;catalytic activity;cation binding;ferric iron binding;ferroxidase activity;ion binding;iron ion binding;metal ion binding;oxidoreductase activity;oxidoreductase activity, oxidizing metal ions;oxidoreductase activity, oxidizing metal ions, oxygen as acceptor;transition metal ion binding	cell part;cytoplasmic part;cytosol;extracellular membrane-bounded organelle;extracellular organelle;extracellular region part;extracellular vesicular exosome;ferritin complex;intracellular ferritin complex;intracellular membrane-bounded organelle;intracellular organelle;intracellular part;macromolecular complex;membrane-bounded organelle;membrane-bounded vesicle;nucleus;organelle;protein complex;…	Mineral absorption;Porphyrin and chlorophyll metabolism	ADDYA_ERYTHROID_DIFFERENTIATION_BY_HEMIN;BANDRES_RESPONSE_TO_CARMUSTIN_MGMT_48HR_DN;BEIER_GLIOMA_STEM_CELL_DN;BENPORATH_MYC_MAX_TARGETS;BLALOCK_ALZHEIMERS_DISEASE_UP;BOUDOUKHA_BOUND_BY_IGF2BP2;BOYAULT_LIVER_CANCER_SUBCLASS_G3_UP;BUYTAERT_PHOTODYNAMIC_THERAPY_STRESS_UP;CAIRO_PML_TARGETS_BOUND_BY_MYC_DN;CATION_HOMEOSTASIS;CAVARD_LIVER_CANCER_MALIGNANT_VS_BENIGN;CELL_PROLIFERATION_GO_0008283;CELLULA…	---	3D-structure;Acetylation;Completeproteome;Iron;Ironstorage;Metal-binding;Oxidoreductase;Phosphoprotein;Referenceproteome			+	Control vs CFT		Ferritin heavy chain;Ferritin heavy chain, N-terminally processed	FTH1	P02794	P02794	FRIH_HUMAN	12	4895600000	331	0.0751493	0.213538	-0.831029
24.4813	22.4292	24.0501	24.1479	24.8424	23.376	22.7905	22.3234	21.1837	20.3556	24.2492	24.7878	20.5353	24.0296	19.0599	23.468	24.1671	22.4885	20.3441	25.4756	19.5201	19.4838	18.1597	23.0763	22.1886	19.2254	19.2366	activation of immune response;biological regulation;complement activation;complement activation, classical pathway;defense response;humoral immune response;immune effector process;immune response;immune system process;innate immune response;macromolecule metabolic process;metabolic process;negative regulation of biological process;negative regulation of complement activation;negative regulation o…		blood microparticle;cell part;extracellular region;extracellular region part;extracellular space;membrane;other organism cell;other organism part;plasma membrane	Complement and coagulation cascades	ATF2_S_UP.V1_DN;BOCHKIS_FOXA2_TARGETS;BROWNE_HCMV_INFECTION_6HR_UP;CAR_HPX;CAR_IGFBP1;chr1q32;COLINA_TARGETS_OF_4EBP1_AND_4EBP2;CREIGHTON_ENDOCRINE_THERAPY_RESISTANCE_3;ESC_J1_UP_EARLY.V1_UP;GAJATE_RESPONSE_TO_TRABECTEDIN_UP;GCNP_SHH_UP_EARLY.V1_DN;GNF2_CYP2B6;GNF2_HPN;GNF2_HPX;GNF2_LCAT;GSE15750_WT_VS_TRAF6KO_DAY10_EFF_CD8_TCELL_UP;GSE17974_0H_VS_0.5H_IN_VITRO_ACT_CD4_TCELL_UP;GSE17974_0H_VS_12H…	---	3D-structure;Complementpathway;Completeproteome;Directproteinsequencing;Disulfidebond;Glycoprotein;Immunity;Innateimmunity;Polymorphism;Referenceproteome;Repeat;Secreted;Signal;Sushi			+	Control vs CFT		C4b-binding protein alpha chain	C4BPA	P04003	P04003	C4BPA_HUMAN	7	391850000	57	0.212992	0.373276	1.04306
31.972	32.0344	32.7835	33.1876	33.5565	33.4253	32.0736	32.682	31.9504	30.9222	30.1404	31.2014	28.4278	31.7539	33.1874	33.8722	31.203	32.4516	33.4672	32.4777	32.0277	29.5123	32.4204	32.4295	30.0447	30.4962	31.8548	biological regulation;blood coagulation;cellular component organization;cellular component organization or biogenesis;cellular membrane fusion;cellular membrane organization;cellular process;cellular process involved in reproduction;cellular process involved in reproduction in multicellular organism;coagulation;establishment of localization;fusion of sperm to egg plasma membrane;gamete generation…	acrosin binding;alcohol binding;amine binding;binding;carbohydrate binding;carboxylic acid binding;cation binding;endopeptidase inhibitor activity;endopeptidase regulator activity;enzyme binding;enzyme inhibitor activity;enzyme regulator activity;glycosaminoglycan binding;heparin binding;ion binding;isoprenoid binding;lipid binding;monocarboxylic acid binding;pattern binding;peptidase inhibitor a…	acrosomal membrane;cell part;cytoplasmic membrane-bounded vesicle;cytoplasmic part;cytoplasmic vesicle;cytoplasmic vesicle membrane;cytoplasmic vesicle part;external side of plasma membrane;extracellular membrane-bounded organelle;extracellular organelle;extracellular region;extracellular region part;extracellular space;extracellular vesicular exosome;intracellular membrane-bounded organelle;intr…	Complement and coagulation cascades	ACEVEDO_LIVER_CANCER_DN;ACEVEDO_LIVER_TUMOR_VS_NORMAL_ADJACENT_TISSUE_DN;BOQUEST_STEM_CELL_CULTURED_VS_FRESH_DN;BOQUEST_STEM_CELL_UP;BROWNE_HCMV_INFECTION_1HR_DN;CARBOHYDRATE_BINDING;chr14q32;CREIGHTON_ENDOCRINE_THERAPY_RESISTANCE_4;DOANE_BREAST_CANCER_ESR1_UP;ENZYME_BINDING;ENZYME_INHIBITOR_ACTIVITY;ENZYME_REGULATOR_ACTIVITY;EXTRACELLULAR_REGION;FARMER_BREAST_CANCER_APOCRINE_VS_LUMINAL;FARMER_BR…	---	3D-structure;Completeproteome;Directproteinsequencing;Fertilization;Glycoprotein;Heparin-binding;Lipidtransport;Polymorphism;Proteaseinhibitor;Referenceproteome;Secreted;Serineproteaseinhibitor;Signal;Transport			+	Control vs CFT		Plasma serine protease inhibitor	SERPINA5	P05154	P05154	IPSP_HUMAN	23	221440000000	3661	0.111191	0.248317	0.959763
26.8281	25.3891	25.9705	27.6971	26.5674	27.92	27.193	25.2895	27.1728	25.8941	25.3054	27.1906	22.685	26.272	24.5822	24.9813	24.5626	25.2975	24.3278	26.1754	26.3644	24.0019	23.7391	24.9877	25.679	24.3299	25.8556	biological regulation;blood coagulation;chemotaxis;coagulation;hemostasis;locomotion;multicellular organismal process;negative regulation of catalytic activity;negative regulation of endopeptidase activity;negative regulation of hydrolase activity;negative regulation of molecular function;negative regulation of peptidase activity;regulation of biological process;regulation of biological quality;r…	binding;carbohydrate binding;endopeptidase inhibitor activity;endopeptidase regulator activity;enzyme inhibitor activity;enzyme regulator activity;glycosaminoglycan binding;heparin binding;pattern binding;peptidase inhibitor activity;peptidase regulator activity;polysaccharide binding;serine-type endopeptidase inhibitor activity	extracellular membrane-bounded organelle;extracellular organelle;extracellular region;extracellular region part;extracellular space;extracellular vesicular exosome;membrane-bounded organelle;membrane-bounded vesicle;organelle;vesicle	Complement and coagulation cascades	AACTTT_UNKNOWN;BYSTRYKH_HEMATOPOIESIS_STEM_CELL_AND_BRAIN_QTL_TRANS;BYSTRYKH_HEMATOPOIESIS_STEM_CELL_QTL_TRANS;CAIRO_LIVER_DEVELOPMENT_DN;CAR_HPX;CERIBELLI_PROMOTERS_INACTIVE_AND_BOUND_BY_NFY;chr22q11;COULOUARN_TEMPORAL_TGFB1_SIGNATURE_DN;CTIP_DN.V1_UP;GNF2_CEBPA;GNF2_GSTM1;GNF2_HPN;GNF2_HPX;GNF2_LCAT;GNF2_TST;GSE17721_CTRL_VS_CPG_0.5H_BMDM_DN;GSE17721_CTRL_VS_PAM3CSK4_2H_BMDM_DN;GSE17721_POLYIC_…	---	3D-structure;Bloodcoagulation;Chemotaxis;Completeproteome;Directproteinsequencing;Diseasemutation;Glycoprotein;Hemostasis;Heparin-binding;Phosphoprotein;Polymorphism;Proteaseinhibitor;Referenceproteome;Repeat;Serineproteaseinhibitor;Signal;Sulfation;Thrombophilia			+	Control vs CFT		Heparin cofactor 2	SERPIND1	P05546	P05546	HEP2_HUMAN	16	3131800000	276	0.0336211	0.116422	1.23628
22.5177	21.0902	22.887	21.7737	21.6401	21.4087	21.702	20.6754	26.898	23.4767	22.6352	23.972	23.6093	21.3619	21.3961	20.6217	24.1312	22.5992	22.6651	23.7075	26.2166	28.6783	23.2319	25.4955	23.6448	21.4577	21.4329	anatomical structure formation involved in morphogenesis;angiogenesis;ATP biosynthetic process;ATP hydrolysis coupled proton transport;ATP metabolic process;ATP synthesis coupled proton transport;biological regulation;biosynthetic process;cation homeostasis;cation transport;cell differentiation;cellular biosynthetic process;cellular cation homeostasis;cellular chemical homeostasis;cellular compon…	active transmembrane transporter activity;adenyl nucleotide binding;adenyl ribonucleotide binding;ATP binding;ATPase activity;ATPase activity, coupled;ATPase activity, coupled to movement of substances;ATPase activity, coupled to transmembrane movement of ions;ATPase activity, coupled to transmembrane movement of substances;binding;catalytic activity;cation transmembrane transporter activity;cati…	cell part;cell surface;cytoplasmic part;extracellular membrane-bounded organelle;extracellular organelle;extracellular region part;extracellular vesicular exosome;intracellular membrane-bounded organelle;intracellular non-membrane-bounded organelle;intracellular organelle;intracellular organelle lumen;intracellular organelle part;intracellular part;macromolecular complex;membrane;membrane part;me…	Alzheimer's disease;Huntington's disease;Oxidative phosphorylation;Parkinson's disease	ALCALA_APOPTOSIS;APPIERTO_RESPONSE_TO_FENRETINIDE_DN;BENPORATH_MYC_MAX_TARGETS;BLALOCK_ALZHEIMERS_DISEASE_DN;CAMP_UP.V1_UP;chr12q13;CYTOPLASM;CYTOPLASMIC_PART;DANG_BOUND_BY_MYC;DIAZ_CHRONIC_MEYLOGENOUS_LEUKEMIA_UP;ENK_UV_RESPONSE_KERATINOCYTE_DN;ENVELOPE;FLECHNER_BIOPSY_KIDNEY_TRANSPLANT_OK_VS_DONOR_DN;GAVIN_FOXP3_TARGETS_CLUSTER_T7;GCANCTGNY_V$MYOD_Q6;GCM_ACTG1;GCM_APEX1;GCM_CBFB;GCM_CSNK2B;GCM_…	---	Acetylation;ATP-binding;ATPsynthesis;CF(1);Completeproteome;Directproteinsequencing;Glycoprotein;Hydrogeniontransport;Hydrolase;Iontransport;Membrane;Mitochondrion;Mitochondrioninnermembrane;Nucleotide-binding;Phosphoprotein;Polymorphism;Referenceproteome;Transitpeptide;Transport			+	Control vs CFT		ATP synthase subunit beta, mitochondrial	ATP5B	P06576	P06576	ATPB_HUMAN	18	1024000000	117	0.0396573	0.121279	-1.37764
24.7658	21.9357	22.9038	24.6796	24.0279	24.8695	24.2947	23.6983	19.6306	24.3042	23.3106	24.1498	20.6964	24.5563	22.4199	23.4434	23.6553	22.3164	23.2435	24.2621	20.3091	18.9623	22.1381	22.8778	23.1037	22.0956	23.513	activation of immune response;biological regulation;cell death;cellular process;complement activation;complement activation, alternative pathway;complement activation, classical pathway;cytolysis;death;defense response;humoral immune response;immune effector process;immune response;immune system process;innate immune response;macromolecule metabolic process;metabolic process;positive regulation o…		cell part;extracellular membrane-bounded organelle;extracellular organelle;extracellular region;extracellular region part;extracellular space;extracellular vesicular exosome;macromolecular complex;membrane;membrane attack complex;membrane part;membrane-bounded organelle;membrane-bounded vesicle;organelle;plasma membrane part;pore complex;protein complex;vesicle	Amoebiasis;Complement and coagulation cascades;Prion diseases;Systemic lupus erythematosus	BOCHKIS_FOXA2_TARGETS;BRUINS_UVC_RESPONSE_EARLY_LATE;CAIRO_HEPATOBLASTOMA_DN;CAR_HPX;CHEN_METABOLIC_SYNDROM_NETWORK;chr1p36;E2F3_UP.V1_DN;FOSTER_KDM1A_TARGETS_UP;GNF2_HPN;GNF2_HPX;GSE10463_CD40L_AND_VA347_VS_CD40L_IN_DC_DN;GSE13229_IMM_VS_INTMATURE_NKCELL_UP;GSE13485_DAY1_VS_DAY3_YF17D_VACCINE_PBMC_UP;GSE24102_GRANULOCYSTIC_MDSC_VS_NEUTROPHIL_DN;GSE27786_LSK_VS_CD8_TCELL_DN;GSE29618_PRE_VS_DAY7_F…	---	3D-structure;Complementalternatepathway;Complementpathway;Completeproteome;Cytolysis;Directproteinsequencing;Disulfidebond;EGF-likedomain;Glycoprotein;Immunity;Innateimmunity;Membraneattackcomplex;Phosphoprotein;Polymorphism;Referenceproteome;Repeat;Secreted;Signal			+	Control vs CFT		Complement component C8 beta chain	C8B	P07358	P07358	CO8B_HUMAN	7	566150000	82	0.161326	0.326802	0.897868
27.4366	27.8385	28.2379	27.8368	27.6216	28.1967	27.76	27.0753	27.4356	28.4507	28.2118	28.8813	28.818	28.6345	28.0282	28.2565	29.9588	27.4054	28.3084	27.894	28.0436	28.4682	29.7375	28.3398	27.5916	29.392	29.3099	biological adhesion;biological regulation;blood coagulation;cell activation;cell adhesion;cell migration;cell motility;cell-matrix adhesion;cell-substrate adhesion;cellular component movement;cellular localization;cellular macromolecule localization;cellular pigment accumulation;cellular pigmentation;cellular process;cellular protein localization;cellular response to stimulus;coagulation;developm…		cell part;cell surface;cytoplasmic membrane-bounded vesicle;cytoplasmic part;cytoplasmic vesicle;cytoplasmic vesicle membrane;cytoplasmic vesicle part;endosomal part;endosome lumen;endosome membrane;extracellular membrane-bounded organelle;extracellular organelle;extracellular region part;extracellular vesicular exosome;integral to membrane;integral to plasma membrane;intracellular membrane-bound…	Lysosome	ACOSTA_PROLIFERATION_INDEPENDENT_MYC_TARGETS_DN;AGUIRRE_PANCREATIC_CANCER_COPY_NUMBER_DN;ALONSO_METASTASIS_EMT_UP;ALONSO_METASTASIS_NEURAL_UP;ALONSO_METASTASIS_UP;AMUNDSON_POOR_SURVIVAL_AFTER_GAMMA_RADIATION_2G;BASSO_HAIRY_CELL_LEUKEMIA_DN;BENPORATH_MYC_TARGETS_WITH_EBOX;BORLAK_LIVER_CANCER_EGF_UP;BYSTROEM_CORRELATED_WITH_IL5_UP;CCAGGTT,MIR-490;CHEN_METABOLIC_SYNDROM_NETWORK;chr12q12;CREIGHTON_EN…	---	Alternativesplicing;Cellmembrane;Completeproteome;Directproteinsequencing;Endosome;Glycoprotein;Lipoprotein;Lysosome;Membrane;Palmitate;Proteintransport;Referenceproteome;Transmembrane;Transmembranehelix;Transport			+	Control vs CFT		CD63 antigen	CD63	P08962	P08962	CD63_HUMAN	3	15140000000	581	0.0371211	0.184452	-0.606509
25.4422	25.4731	25.8228	25.4605	26.3478	25.4705	25.253	26.2794	24.3768	24.3739	25.0558	25.516	26.2246	26.0599	25.5492	24.437	24.8604	25.3634	25.0992	23.948	24.0772	24.3631	25.3778	24.8876	25.3916	25.1356	24.2077	actin cytoskeleton organization;actin cytoskeleton reorganization;actin filament-based process;biological regulation;cell surface receptor linked signaling pathway;cellular component organization;cellular component organization at cellular level;cellular component organization or biogenesis;cellular component organization or biogenesis at cellular level;cellular localization;cellular process;cell…	ATPase binding;binding;catalytic activity;cytoskeletal protein binding;Edg-2 lysophosphatidic acid receptor binding;endothelial differentiation G-protein coupled receptor binding;enzyme binding;GDP binding;G-protein-coupled receptor binding;GTP binding;GTPase activity;guanyl nucleotide binding;guanyl ribonucleotide binding;hydrolase activity;hydrolase activity, acting on acid anhydrides;hydrolase…	adherens junction;anchoring junction;cell division site part;cell junction;cell part;cell surface;cell-substrate adherens junction;cell-substrate junction;cleavage furrow;cytoplasmic part;cytoplasmic vesicle membrane;cytoplasmic vesicle part;extracellular membrane-bounded organelle;extracellular organelle;extracellular region part;extracellular vesicular exosome;focal adhesion;intracellular organ…	Pancreatic cancer;Pathways in cancer	AAGWWRNYGGC_UNKNOWN;ACTGAAA,MIR-30A-3P,MIR-30E-3P;ACTGCCT,MIR-34B;ASTON_MAJOR_DEPRESSIVE_DISORDER_DN;ATGTAGC,MIR-221,MIR-222;BEHAVIOR;BIOCARTA_RAS_PATHWAY;BLALOCK_ALZHEIMERS_DISEASE_UP;BLUM_RESPONSE_TO_SALIRASIB_UP;BORCZUK_MALIGNANT_MESOTHELIOMA_UP;BROCKE_APOPTOSIS_REVERSED_BY_IL6;BRUINS_UVC_RESPONSE_LATE;BYSTRYKH_HEMATOPOIESIS_STEM_CELL_QTL_TRANS;CHANDRAN_METASTASIS_TOP50_UP;CHANDRAN_METASTASIS_…	---	3D-structure;Cellcycle;Celldivision;Cellmembrane;Completeproteome;Exocytosis;GTP-binding;Host-virusinteraction;Lipoprotein;Membrane;Methylation;Nucleotide-binding;Prenylation;Referenceproteome			+	Control vs CFT		Ras-related protein Ral-A	RALA	P11233	P11233	RALA_HUMAN	9	1402400000	149	0.0384727	0.184466	0.621646
27.7967	27.7507	26.1307	27.3567	28.2909	27.2799	28.1889	25.1587	24.7548	21.5058	25.2791	24.1853	23.8851	26.9062	28.5796	27.9062	28.6099	29.0799	28.1894	28.2902	20.7143	20.8868	25.5995	28.7056	25.5923	23.5797	24.9542	activation of immune response;biological regulation;cell surface receptor linked signaling pathway;cellular process;cellular response to stimulus;complement activation;complement activation, classical pathway;complement receptor mediated signaling pathway;defense response;humoral immune response;immune effector process;immune response;immune response-activating cell surface receptor signaling pat…	binding;complement binding;complement component C3a binding;complement component C3b binding;complement component C3b receptor activity;complement component C4b binding;complement component C4b receptor activity;complement receptor activity;molecular transducer activity;opsonin binding;opsonin receptor activity;protein binding;receptor activity;signal transducer activity;signaling receptor activi…	cell part;cell surface;extracellular membrane-bounded organelle;extracellular organelle;extracellular region part;extracellular vesicular exosome;integral to membrane;integral to plasma membrane;intrinsic to membrane;intrinsic to plasma membrane;membrane;membrane part;membrane-bounded organelle;membrane-bounded vesicle;organelle;plasma membrane;plasma membrane part;vesicle	Complement and coagulation cascades;Hematopoietic cell lineage;ko05152;Leishmaniasis;Malaria	BAELDE_DIABETIC_NEPHROPATHY_DN;BIOCARTA_BLYMPHOCYTE_PATHWAY;BLALOCK_ALZHEIMERS_DISEASE_INCIPIENT_UP;BLALOCK_ALZHEIMERS_DISEASE_UP;BONOME_OVARIAN_CANCER_SURVIVAL_SUBOPTIMAL_DEBULKING;chr1q32;DEURIG_T_CELL_PROLYMPHOCYTIC_LEUKEMIA_UP;DODD_NASOPHARYNGEAL_CARCINOMA_UP;GSE12366_GC_VS_MEMORY_BCELL_DN;GSE12366_GC_VS_NAIVE_BCELL_DN;GSE17974_IL4_AND_ANTI_IL12_VS_UNTREATED_12H_ACT_CD4_TCELL_DN;GSE22886_NAIV…	---	3D-structure;Bloodgroupantigen;Complementpathway;Completeproteome;Disulfidebond;Glycoprotein;Immunity;Innateimmunity;Membrane;Polymorphism;Pyrrolidonecarboxylicacid;Receptor;Referenceproteome;Repeat;Signal;Sushi;Transmembrane;Transmembranehelix			+	Control vs CFT		Complement receptor type 1	CR1	P17927	P17927	CR1_HUMAN	25	6352800000	529	0.389271	0.576716	0.813191
23.7122	25.0632	23.8943	24.5623	25.513	24.6508	23.5513	24.2646	24.7039	22.5456	23.8376	22.5293	19.6077	23.3163	25.56	23.2801	23.0355	23.591	24.2618	23.9348	24.3685	21.6315	23.3239	24.2694	22.471	21.1335	22.4441	cellular metabolic process;cellular process;metabolic process;peptide amidation;peptide metabolic process;peptide modification	amidine-lyase activity;binding;carbon-nitrogen lyase activity;carboxylic acid binding;catalytic activity;cation binding;copper ion binding;ion binding;L-ascorbic acid binding;lyase activity;metal ion binding;monooxygenase activity;oxidoreductase activity;oxidoreductase activity, acting on paired donors, with incorporation or reduction of molecular oxygen;oxidoreductase activity, acting on paired …	cell part;extracellular membrane-bounded organelle;extracellular organelle;extracellular region part;extracellular vesicular exosome;integral to membrane;intrinsic to membrane;membrane;membrane part;membrane-bounded organelle;membrane-bounded vesicle;organelle;vesicle		ACAWYAAAG_UNKNOWN;ACEVEDO_LIVER_CANCER_WITH_H3K27ME3_UP;BAELDE_DIABETIC_NEPHROPATHY_DN;BIOPOLYMER_METABOLIC_PROCESS;BIOPOLYMER_MODIFICATION;BLALOCK_ALZHEIMERS_DISEASE_DN;BONOME_OVARIAN_CANCER_SURVIVAL_SUBOPTIMAL_DEBULKING;CAGCTG_V$AP4_Q5;CAGTATT,MIR-200B,MIR-200C,MIR-429;CAMP_UP.V1_DN;CELL_CYCLE_GO_0007049;CELL_CYCLE_PHASE;CELL_CYCLE_PROCESS;CELLULAR_MACROMOLECULE_METABOLIC_PROCESS;CELLULAR_PROTE…	---	Alternativesplicing;Cleavageonpairofbasicresidues;Completeproteome;Copper;Disulfidebond;Glycoprotein;Lyase;Membrane;Metal-binding;Monooxygenase;Multifunctionalenzyme;Oxidoreductase;Phosphoprotein;Polymorphism;Referenceproteome;Repeat;Secreted;Signal;Sulfation;Transmembrane;Transmembranehelix;VitaminC;Zinc			+	Control vs CFT		Peptidyl-glycine alpha-amidating monooxygenase;Peptidylglycine alpha-hydroxylating monooxygenase;Peptidyl-alpha-hydroxyglycine alpha-amidating lyase	PAM	P19021	P19021	AMD_HUMAN	9	675290000	71	0.0756004	0.195042	1.05116
24.7564	25.4361	24.6179	24.9378	25.0786	24.5	24.11	24.2974	19.3605	23.1967	18.8187	22.9467	24.3851	24.5518	24.3152	23.7529	23.7418	24.9618	20.3252	18.4902	18.8943	18.2463	19.7969	20.7886	19.9305	19.4412	19.4596	biological regulation;negative regulation of biological process;negative regulation of blood coagulation;negative regulation of coagulation;negative regulation of multicellular organismal process;regulation of biological process;regulation of blood coagulation;regulation of coagulation;regulation of multicellular organismal process;regulation of response to external stimulus;regulation of respons…		cell part;extracellular membrane-bounded organelle;extracellular organelle;extracellular region part;extracellular vesicular exosome;integral to membrane;intrinsic to membrane;membrane part;membrane-bounded organelle;membrane-bounded vesicle;organelle;vesicle		ACEVEDO_FGFR1_TARGETS_IN_PROSTATE_CANCER_MODEL_UP;ACEVEDO_LIVER_CANCER_UP;ACEVEDO_NORMAL_TISSUE_ADJACENT_TO_LIVER_TUMOR_UP;AFFAR_YY1_TARGETS_DN;BECKER_TAMOXIFEN_RESISTANCE_UP;BIOPOLYMER_METABOLIC_PROCESS;BIOPOLYMER_MODIFICATION;BIOSYNTHETIC_PROCESS;BOQUEST_STEM_CELL_CULTURED_VS_FRESH_UP;BOQUEST_STEM_CELL_UP;BYSTRYKH_HEMATOPOIESIS_STEM_CELL_QTL_CIS;CAGGTG_V$E12_Q6;CELLULAR_MACROMOLECULE_METABOLIC_…	---	Completeproteome;Glycoprotein;Membrane;Polymorphism;Referenceproteome;Transmembrane;Transmembranehelix			+	Control vs CFT	+	Tetraspanin-8	TSPAN8	P19075	P19075	TSN8_HUMAN	2	741880000	92	0.0166403	0.0569496	2.31289
27.158	24.5844	23.8984	26.8675	25.5685	27.2622	26.8825	25.4957	26.4661	24.7725	24.9757	26.3652	21.5811	25.4762	23.1627	22.6211	23.595	25.7409	20.5848	24.5255	26.7117	23.6153	23.3126	24.7251	24.6456	19.7969	20.3395	amine metabolic process;aminoglycan metabolic process;carbohydrate metabolic process;glycosaminoglycan metabolic process;hyaluronan metabolic process;macromolecule metabolic process;metabolic process;nitrogen compound metabolic process;polysaccharide metabolic process;primary metabolic process	binding;calcium ion binding;cation binding;endopeptidase inhibitor activity;endopeptidase regulator activity;enzyme inhibitor activity;enzyme regulator activity;ion binding;metal ion binding;peptidase inhibitor activity;peptidase regulator activity;serine-type endopeptidase inhibitor activity	blood microparticle;extracellular membrane-bounded organelle;extracellular organelle;extracellular region;extracellular region part;extracellular vesicular exosome;membrane-bounded organelle;membrane-bounded vesicle;organelle;vesicle		ACEVEDO_LIVER_CANCER_DN;BANDRES_RESPONSE_TO_CARMUSTIN_MGMT_48HR_DN;BOCHKIS_FOXA2_TARGETS;CAIRO_LIVER_DEVELOPMENT_DN;CALCIUM_ION_BINDING;CAR_HPX;CAR_IGFBP1;CATION_BINDING;CHIANG_LIVER_CANCER_SUBCLASS_PROLIFERATION_DN;chr3p21;GCM_DDX11;GNF2_CEBPA;GNF2_GSTM1;GNF2_HPN;GNF2_HPX;GNF2_LCAT;GNF2_TST;GSE10239_KLRG1INT_VS_KLRG1HIGH_EFF_CD8_TCELL_UP;GSE1460_INTRATHYMIC_T_PROGENITOR_VS_NAIVE_CD4_TCELL_ADULT_…	---	Alternativesplicing;Completeproteome;Directproteinsequencing;Disulfidebond;Glycoprotein;Phosphoprotein;Polymorphism;Proteaseinhibitor;Proteoglycan;Referenceproteome;Secreted;Serineproteaseinhibitor;Signal			+	Control vs CFT		Inter-alpha-trypsin inhibitor heavy chain H1	ITIH1	P19827	P19827	ITIH1_HUMAN	14	2090700000	243	0.028711	0.0878384	1.80909
24.0507	22.896	23.4898	23.2764	22.4293	23.3363	24.2088	23.1912	24.9032	26.1693	23.3031	24.2886	23.7282	24.8308	22.9156	25.3118	25.2785	23.6104	23.3805	24.1998	24.5692	26.6903	23.7743	23.8241	25.0019	24.048	24.6869	activation of immune response;activation of innate immune response;anaphase-promoting complex-dependent proteasomal ubiquitin-dependent protein catabolic process;antigen processing and presentation;antigen processing and presentation of exogenous antigen;antigen processing and presentation of exogenous peptide antigen;antigen processing and presentation of exogenous peptide antigen via MHC class …	catalytic activity;endopeptidase activity;hydrolase activity;peptidase activity;peptidase activity, acting on L-amino acid peptides;threonine-type endopeptidase activity;threonine-type peptidase activity	cell part;centrosome;cytoplasm;cytoplasmic part;cytoskeletal part;cytosol;extracellular membrane-bounded organelle;extracellular organelle;extracellular region part;extracellular vesicular exosome;intracellular membrane-bounded organelle;intracellular non-membrane-bounded organelle;intracellular organelle;intracellular organelle part;intracellular part;macromolecular complex;membrane-bounded orga…	Proteasome	ACEVEDO_LIVER_TUMOR_VS_NORMAL_ADJACENT_TISSUE_UP;BASSO_B_LYMPHOCYTE_NETWORK;BENPORATH_MYC_MAX_TARGETS;BENPORATH_NANOG_TARGETS;BERENJENO_TRANSFORMED_BY_RHOA_UP;BIOCARTA_PROTEASOME_PATHWAY;BLALOCK_ALZHEIMERS_DISEASE_DN;CAIRO_HEPATOBLASTOMA_CLASSES_UP;CASORELLI_ACUTE_PROMYELOCYTIC_LEUKEMIA_DN;CCCNNNNNNAAGWT_UNKNOWN;CHESLER_BRAIN_HIGHEST_EXPRESSION;CHIARADONNA_NEOPLASTIC_TRANSFORMATION_KRAS_CDC25_UP;…	KEGG_PROTEASOME_Yes	3D-structure;Alternativesplicing;Completeproteome;Cytoplasm;Directproteinsequencing;Host-virusinteraction;Hydrolase;Nucleus;Polymorphism;Protease;Proteasome;Referenceproteome;Threonineprotease;Zymogen			+	Control vs CFT		Proteasome subunit beta type-5	PSMB5	P28074	P28074	PSB5_HUMAN	9	880420000	131	0.022716	0.105887	-0.966838
25.9043	24.8999	26.3142	26.6428	26.6621	25.8637	25.6683	26.4266	22.2975	23.1589	24.8439	26.0971	25.2617	26.4434	25.5472	26.2528	25.3495	23.6474	26.4857	23.6829	22.5962	22.1411	25.6184	24.6652	26.4101	23.7693	25.1845	cellular component organization;cellular component organization or biogenesis;macromolecule metabolic process;membrane fusion;membrane organization;metabolic process;primary metabolic process;protein metabolic process;proteolysis	binding;calcium ion binding;calcium-dependent cysteine-type endopeptidase activity;catalytic activity;cation binding;cysteine-type endopeptidase activity;cysteine-type peptidase activity;endopeptidase activity;hydrolase activity;identical protein binding;ion binding;metal ion binding;peptidase activity;peptidase activity, acting on L-amino acid peptides;protein binding;protein dimerization activi…	cell part;cytoplasm;extracellular membrane-bounded organelle;extracellular organelle;extracellular region part;extracellular vesicular exosome;intracellular part;membrane;membrane-bounded organelle;membrane-bounded vesicle;organelle;plasma membrane;vesicle		BOYLAN_MULTIPLE_MYELOMA_C_D_DN;CAGGTG_V$E12_Q6;CALCIUM_ION_BINDING;CASORELLI_APL_SECONDARY_VS_DE_NOVO_UP;CATION_BINDING;chr2p14;CHUNG_BLISTER_CYTOTOXICITY_DN;CHYLA_CBFA2T3_TARGETS_UP;COLDREN_GEFITINIB_RESISTANCE_DN;CYTOPLASM;DAVICIONI_MOLECULAR_ARMS_VS_ERMS_UP;DELACROIX_RAR_BOUND_ES;DODD_NASOPHARYNGEAL_CARCINOMA_DN;DUNNE_TARGETS_OF_AML1_MTG8_FUSION_UP;FORTSCHEGGER_PHF8_TARGETS_DN;FOSTER_KDM1A_TAR…	---	3D-structure;Calcium;Completeproteome;Cytoplasm;Directproteinsequencing;Membrane;Metal-binding;Polymorphism;Referenceproteome;Repeat			+	Control vs CFT		Grancalcin	GCA	P28676	P28676	GRAN_HUMAN	6	2048800000	176	0.0476582	0.147761	1.1254
25.0393	25.129	24.9557	24.2515	24.6852	24.6442	24.1519	23.6166	25.3773	26.4734	24.5094	23.9768	25.324	25.2696	25.4661	24.3374	24.6821	24.4259	23.7828	25.2636	27.242	26.7083	25.5608	24.7562	24.9269	25.0861	26.3324	macromolecule metabolic process;metabolic process;primary metabolic process;protein metabolic process;proteolysis	aminopeptidase activity;binding;catalytic activity;cation binding;exopeptidase activity;hydrolase activity;ion binding;manganese ion binding;metal ion binding;metalloexopeptidase activity;metallopeptidase activity;peptidase activity;peptidase activity, acting on L-amino acid peptides;transition metal ion binding	adherens junction;anchoring junction;cell junction;cell part;cell-substrate adherens junction;cell-substrate junction;cytoplasm;cytoplasmic part;extracellular membrane-bounded organelle;extracellular organelle;extracellular region part;extracellular vesicular exosome;focal adhesion;Golgi apparatus part;intracellular membrane-bounded organelle;intracellular organelle;intracellular organelle part;i…	Arginine and proline metabolism;Glutathione metabolism	ACEVEDO_LIVER_CANCER_UP;ACEVEDO_NORMAL_TISSUE_ADJACENT_TO_LIVER_TUMOR_UP;BCAT_GDS748_DN;BERTUCCI_MEDULLARY_VS_DUCTAL_BREAST_CANCER_UP;BOYAULT_LIVER_CANCER_SUBCLASS_G1_DN;CACGTG_V$MYC_Q2;CHEBOTAEV_GR_TARGETS_UP;chr4p15;DAUER_STAT3_TARGETS_DN;DODD_NASOPHARYNGEAL_CARCINOMA_DN;GSE10325_BCELL_VS_LUPUS_BCELL_DN;GSE10325_CD4_TCELL_VS_LUPUS_CD4_TCELL_DN;GSE10325_MYELOID_VS_LUPUS_MYELOID_DN;GSE11057_NAIVE…	---	Acetylation;Alternativeinitiation;Aminopeptidase;Completeproteome;Cytoplasm;Directproteinsequencing;Hydrolase;Magnesium;Manganese;Metal-binding;Phosphoprotein;Protease;Referenceproteome;Zinc			+	Control vs CFT		Cytosol aminopeptidase	LAP3	P28838	P28838	AMPL_HUMAN	16	1555300000	119	0.27316	0.535756	-0.348192
23.1984	22.628	23.5772	23.8326	24.6312	23.3009	22.5945	23.1151	22.0691	21.9858	18.16	23.5791	22.3642	23.9224	22.8456	22.7569	24.1545	22.9638	23.1712	20.7632	20.2916	19.5327	24.3506	22.279	22.3307	19.2018	19.93	anatomical structure development;biological regulation;calcium-mediated signaling;cell communication;cell-cell signaling;cellular process;cellular response to stimulus;developmental process;establishment of localization;inner ear development;intracellular signal transduction;regulation of biological process;regulation of biological quality;regulation of blood pressure;regulation of cellular proce…	actin binding;binding;calcium ion binding;cation binding;clathrin binding;cytoskeletal protein binding;ion binding;metal ion binding;protein binding;tubulin binding	cell part;clathrin coat;clathrin coat of trans-Golgi network vesicle;clathrin vesicle coat;cytoplasmic part;cytoplasmic vesicle part;cytosol;extracellular membrane-bounded organelle;extracellular organelle;extracellular region part;extracellular vesicular exosome;Golgi apparatus part;intracellular;intracellular organelle part;intracellular part;macromolecular complex;membrane coat;membrane part;m…		AACTTT_UNKNOWN;ACEVEDO_LIVER_CANCER_WITH_H3K27ME3_UP;ACEVEDO_LIVER_CANCER_WITH_H3K9ME3_UP;ACTIN_BINDING;ALCALAY_AML_BY_NPM1_LOCALIZATION_DN;AMIT_EGF_RESPONSE_480_HELA;AMIT_EGF_RESPONSE_480_MCF10A;BASAKI_YBX1_TARGETS_DN;BENPORATH_SUZ12_TARGETS;BHAT_ESR1_TARGETS_VIA_AKT1_UP;BLALOCK_ALZHEIMERS_DISEASE_DN;BOYAULT_LIVER_CANCER_SUBCLASS_G56_DN;BRUINS_UVC_RESPONSE_EARLY_LATE;BRUINS_UVC_RESPONSE_LATE;BRU…	---	Calcium;Completeproteome;Lipoprotein;Metal-binding;Myristate;Polymorphism;Referenceproteome;Repeat			+	Control vs CFT		Hippocalcin-like protein 1	HPCAL1	P37235;P84074;P61601	P37235	HPCL1_HUMAN	6	319120000	55	0.13054	0.27758	0.965087
23.7422	23.7928	23.5964	24.4682	23.3612	24.0145	24.8174	23.5265	23.8764	23.9867	19.5198	23.2237	20.5886	23.4344	23.2265	23.2677	20.5794	22.8151	23.7745	24.8875	23.1141	19.6187	22.3829	23.6575	23.3542	19.3271	18.2169	anatomical structure development;anatomical structure homeostasis;anatomical structure morphogenesis;biological regulation;catabolic process;cell morphogenesis;cell proliferation;cellular component morphogenesis;cellular component organization;cellular component organization or biogenesis;cellular developmental process;cellular process;cytokine production;defense response;developmental process;ho…	carboxylic ester hydrolase activity;catalytic activity;hydrolase activity;hydrolase activity, acting on ester bonds;lipase activity;sterol esterase activity	cell part;cytoplasmic part;extracellular membrane-bounded organelle;extracellular organelle;extracellular region part;extracellular vesicular exosome;intracellular membrane-bounded organelle;intracellular organelle;intracellular part;lysosome;lytic vacuole;membrane-bounded organelle;membrane-bounded vesicle;organelle;vacuole;vesicle	Lysosome;Steroid biosynthesis	ACEVEDO_LIVER_CANCER_UP;ALONSO_METASTASIS_UP;ASTON_MAJOR_DEPRESSIVE_DISORDER_DN;BERENJENO_TRANSFORMED_BY_RHOA_DN;BIOPOLYMER_METABOLIC_PROCESS;BIOPOLYMER_MODIFICATION;BIOSYNTHETIC_PROCESS;BROWNE_HCMV_INFECTION_48HR_DN;BUYTAERT_PHOTODYNAMIC_THERAPY_STRESS_DN;CELLULAR_MACROMOLECULE_METABOLIC_PROCESS;CELLULAR_PROTEIN_METABOLIC_PROCESS;CHANG_CORE_SERUM_RESPONSE_DN;CHEN_METABOLIC_SYNDROM_NETWORK;CHICAS…	---	Alternativesplicing;Completeproteome;Directproteinsequencing;Diseasemutation;Glycoprotein;Hydrolase;Lipiddegradation;Lipidmetabolism;Lysosome;Polymorphism;Referenceproteome;Signal			+	Control vs CFT		Lysosomal acid lipase/cholesteryl ester hydrolase	LIPA	P38571	P38571	LICH_HUMAN	6	489580000	40	0.0715471	0.183976	1.14987
22.3897	23.2909	22.516	22.4143	22.6841	22.2417	22.256	22.0434	19.2006	18.6046	22.373	19.2906	21.926	22.4397	21.8778	21.5406	20.096	23.6016	21.2691	19.2386	23.8405	18.5972	21.8548	21.649	20.159	18.33	19.7427	aging;amine biosynthetic process;amine metabolic process;anatomical structure development;biosynthetic process;carboxylic acid biosynthetic process;carboxylic acid metabolic process;cellular amine metabolic process;cellular amino acid biosynthetic process;cellular amino acid metabolic process;cellular biosynthetic process;cellular ketone metabolic process;cellular metabolic process;cellular modif…	acid-amino acid ligase activity;adenyl nucleotide binding;adenyl ribonucleotide binding;amine binding;amino acid binding;ATP binding;binding;carboxylic acid binding;catalytic activity;cation binding;glutathione binding;glutathione synthase activity;glycine binding;identical protein binding;ion binding;ligase activity;ligase activity, forming carbon-nitrogen bonds;magnesium ion binding;metal ion b…	cell part;cytoplasmic part;cytosol;extracellular membrane-bounded organelle;extracellular organelle;extracellular region part;extracellular vesicular exosome;intracellular part;membrane-bounded organelle;membrane-bounded vesicle;organelle;vesicle	Glutathione metabolism	AACTTT_UNKNOWN;ACID_AMINO_ACID_LIGASE_ACTIVITY;AMINE_METABOLIC_PROCESS;AMINO_ACID_AND_DERIVATIVE_METABOLIC_PROCESS;AMINO_ACID_METABOLIC_PROCESS;ANATOMICAL_STRUCTURE_DEVELOPMENT;BIOCARTA_FREE_PATHWAY;BROWNE_HCMV_INFECTION_1HR_UP;BRUINS_UVC_RESPONSE_VIA_TP53_GROUP_B;CARBOXYLIC_ACID_METABOLIC_PROCESS;CASORELLI_ACUTE_PROMYELOCYTIC_LEUKEMIA_DN;CHEN_METABOLIC_SYNDROM_NETWORK;CHEOK_RESPONSE_TO_MERCAPTOP…	---	3D-structure;Acetylation;Alternativesplicing;ATP-binding;Completeproteome;Directproteinsequencing;Diseasemutation;Glutathionebiosynthesis;Hereditaryhemolyticanemia;Ligase;Magnesium;Metal-binding;Nucleotide-binding;Phosphoprotein;Polymorphism;Referenceproteome			+	Control vs CFT		Glutathione synthetase	GSS	P48637	P48637	GSHB_HUMAN	4	148140000	28	0.0177871	0.0704	1.52466
22.0113	22.2271	21.8366	21.7128	22.0762	21.9329	20.7802	21.4131	21.5697	21.8204	20.0503	19.0954	20.3388	21.7589	23.0128	20.381	20.8397	21.7345	19.3195	18.5268	18.3914	18.9548	21.3216	19.2973	18.1731	20.0615	20.251	catabolic process;cellular catabolic process;cellular macromolecule catabolic process;cellular macromolecule metabolic process;cellular metabolic process;cellular nitrogen compound metabolic process;cellular process;DNA catabolic process;DNA catabolic process, endonucleolytic;DNA metabolic process;macromolecule catabolic process;macromolecule metabolic process;metabolic process;nitrogen compound …	binding;catalytic activity;deoxyribonuclease activity;DNA binding;endodeoxyribonuclease activity;endodeoxyribonuclease activity, producing 5'-phosphomonoesters;endonuclease activity;endonuclease activity, active with either ribo- or deoxyribonucleic acids and producing 5'-phosphomonoesters;hydrolase activity;hydrolase activity, acting on ester bonds;nuclease activity;nucleic acid binding	cell part;cytoplasmic part;endoplasmic reticulum;extracellular membrane-bounded organelle;extracellular organelle;extracellular region part;extracellular vesicular exosome;intracellular membrane-bounded organelle;intracellular organelle;intracellular part;membrane-bounded organelle;membrane-bounded vesicle;nucleus;organelle;vesicle		BROWNE_HCMV_INFECTION_16HR_DN;BROWNE_HCMV_INFECTION_20HR_DN;CAGGTG_V$E12_Q6;CHEN_METABOLIC_SYNDROM_NETWORK;chrxq28;CONCANNON_APOPTOSIS_BY_EPOXOMICIN_DN;DAVICIONI_MOLECULAR_ARMS_VS_ERMS_UP;DEOXYRIBONUCLEASE_ACTIVITY;DNA_BINDING;GAZDA_DIAMOND_BLACKFAN_ANEMIA_ERYTHROID_DN;GSE14000_4H_VS_16H_LPS_DC_TRANSLATED_RNA_UP;GSE1432_6H_VS_24H_IFNG_MICROGLIA_DN;GSE15930_NAIVE_VS_72H_IN_VITRO_STIM_TRICHOSTATINA…	---	Completeproteome;Disulfidebond;Endonuclease;Endoplasmicreticulum;Glycoprotein;Hydrolase;Nuclease;Polymorphism;Referenceproteome;Signal			+	Control vs CFT		Deoxyribonuclease-1-like 1	DNASE1L1	P49184	P49184	DNSL1_HUMAN	2	95382000	26	0.0478904	0.154621	1.0448
27.3914	27.8536	27.8546	27.8758	27.9353	27.7575	27.2907	27.8018	27.1842	26.7873	27.0772	27.5371	27.7704	27.6616	28.0532	26.9842	27.0938	27.0766	27.4251	26.8654	26.0973	26.0728	27.2681	27.2654	27.6792	27.1327	26.743	biological regulation;cellular process;cellular response to stimulus;establishment of localization;establishment of localization in cell;establishment of protein localization;intracellular protein transport;intracellular signal transduction;intracellular transport;metabolic process;plasma membrane to endosome transport;protein transport;Rab protein signal transduction;Ras protein signal transduct…	binding;catalytic activity;GDP binding;GTP binding;GTPase activity;guanyl nucleotide binding;guanyl ribonucleotide binding;hydrolase activity;hydrolase activity, acting on acid anhydrides;hydrolase activity, acting on acid anhydrides, in phosphorus-containing anhydrides;nucleoside-triphosphatase activity;nucleotide binding;purine nucleotide binding;purine ribonucleoside triphosphate binding;purin…	cell part;cytoplasmic membrane-bounded vesicle;cytoplasmic part;cytoplasmic vesicle;early endosome;early endosome membrane;endocytic vesicle;endosomal part;endosome;endosome membrane;extracellular membrane-bounded organelle;extracellular organelle;extracellular region part;extracellular vesicular exosome;intracellular membrane-bounded organelle;intracellular organelle;intracellular organelle part…	Amoebiasis;Endocytosis;ko05152;Phagosome;Vasopressin-regulated water reabsorption	AAAYRNCTG_UNKNOWN;AACWWCAANK_UNKNOWN;ACCAATC,MIR-509;ACCTGTTG_UNKNOWN;ACTAYRNNNCCCR_UNKNOWN;AGCYRWTTC_UNKNOWN;AGTCAGC,MIR-345;AGTCTTA,MIR-499;AGUIRRE_PANCREATIC_CANCER_COPY_NUMBER_UP;BROWNE_HCMV_INFECTION_12HR_UP;BROWNE_HCMV_INFECTION_24HR_UP;CARD_MIR302A_TARGETS;CATGTAA,MIR-496;chr17q21;CTGAGCC,MIR-24;CTTTGA_V$LEF1_Q2;ERB2_UP.V1_UP;GCACCTT,MIR-18A,MIR-18B;GGGAGGRR_V$MAZ_Q6;GGGTGGRR_V$PAX4_03;GOL…	---	3D-structure;Alternativesplicing;Cellmembrane;Completeproteome;Endosome;GTP-binding;Lipoprotein;Membrane;Nucleotide-binding;Polymorphism;Prenylation;Proteintransport;Referenceproteome;Transport			+	Control vs CFT		Ras-related protein Rab-5C	RAB5C	P51148	P51148	RAB5C_HUMAN	11	6925700000	463	0.0135584	0.181375	0.427079
27.5385	25.8765	26.9905	26.7847	27.9937	27.0449	26.7125	28.1695	25.7493	26.6664	25.596	25.6466	28.2273	26.4002	26.8465	25.6351	25.1146	26.7459	28.1351	23.7288	25.6699	25.4585	25.9947	25.8828	25.5899	27.7101	24.9997	anatomical structure development;anatomical structure formation involved in morphogenesis;angiogenesis;biological regulation;blood vessel development;catabolic process;cellular lipid metabolic process;cellular metabolic process;cellular process;cellular response to stimulus;developmental process;embryonic organ development;inositol lipid-mediated signaling;inositol phosphate metabolic process;int…	binding;calcium ion binding;calcium-dependent phospholipase C activity;catalytic activity;cation binding;GTPase activating protein binding;hydrolase activity;hydrolase activity, acting on ester bonds;ion binding;lipase activity;lipid binding;metal ion binding;molecular transducer activity;phosphatidic acid binding;phosphatidylinositol phospholipase C activity;phosphatidylserine binding;phospholip…	cell part;cytoplasm;cytoplasmic part;cytosol;extracellular membrane-bounded organelle;extracellular organelle;extracellular region part;extracellular vesicular exosome;intracellular membrane-bounded organelle;intracellular organelle;intracellular part;membrane;membrane-bounded organelle;membrane-bounded vesicle;organelle;plasma membrane;vesicle	Calcium signaling pathway;Inositol phosphate metabolism;Phosphatidylinositol signaling system	ACEVEDO_FGFR1_TARGETS_IN_PROSTATE_CANCER_MODEL_UP;ATM_DN.V1_DN;BERENJENO_TRANSFORMED_BY_RHOA_DN;BOYLAN_MULTIPLE_MYELOMA_D_CLUSTER_UP;BROWNE_HCMV_INFECTION_14HR_DN;BROWNE_HCMV_INFECTION_18HR_DN;BROWNE_HCMV_INFECTION_48HR_DN;BUYTAERT_PHOTODYNAMIC_THERAPY_STRESS_UP;CAMP_UP.V1_UP;CELLULAR_LIPID_METABOLIC_PROCESS;CHARAFE_BREAST_CANCER_LUMINAL_VS_MESENCHYMAL_UP;chr3p22;chr3q25;CSR_EARLY_UP.V1_DN;CSR_EA…	---	Alternativesplicing;Calcium;Completeproteome;Cytoplasm;Diseasemutation;Glycoprotein;Hydrolase;Lipiddegradation;Lipidmetabolism;Membrane;Metal-binding;Phosphoprotein;Polymorphism;Referenceproteome;Repeat;Transducer			+	Control vs CFT		1-phosphatidylinositol 4,5-bisphosphate phosphodiesterase delta-1	PLCD1	P51178;Q4KWH8	P51178	PLCD1_HUMAN	21	4097800000	512	0.0763455	0.206393	0.9312
22.5721	18.2711	22.5947	19.5794	20.1788	22.829	18.5229	22.4514	19.5072	25.1133	23.1482	22.5798	19.7815	22.0512	22.6158	20.583	19.9493	22.4658	22.7754	21.9533	24.3673	22.4247	22.8181	22.2051	22.9645	23.1061	24.1874	cellular metabolic process;cellular nitrogen compound metabolic process;cellular process;metabolic process;methylation;nitrogen compound metabolic process;nucleobase-containing compound metabolic process;one-carbon metabolic process;primary metabolic process;small molecule metabolic process;xenobiotic metabolic process	catalytic activity;methyltransferase activity;S-adenosylmethionine-dependent methyltransferase activity;S-methyltransferase activity;thiopurine S-methyltransferase activity;transferase activity;transferase activity, transferring one-carbon groups	cell part;cytoplasmic part;cytosol;extracellular membrane-bounded organelle;extracellular organelle;extracellular region part;extracellular vesicular exosome;intracellular part;membrane-bounded organelle;membrane-bounded vesicle;organelle;vesicle	Drug metabolism - other enzymes	BLALOCK_ALZHEIMERS_DISEASE_UP;BRUINS_UVC_RESPONSE_LATE;CAGCTG_V$AP4_Q5;CCTNTMAGA_UNKNOWN;CHEMNITZ_RESPONSE_TO_PROSTAGLANDIN_E2_DN;chr6p22;FEVR_CTNNB1_TARGETS_DN;FULCHER_INFLAMMATORY_RESPONSE_LECTIN_VS_LPS_UP;GCANCTGNY_V$MYOD_Q6;GSE13306_RA_VS_UNTREATED_TREG_DN;GSE13306_TREG_RA_VS_TCONV_RA_DN;GSE14000_4H_VS_16H_LPS_DC_TRANSLATED_RNA_UP;GSE14000_4H_VS_16H_LPS_DC_UP;GSE1460_DP_THYMOCYTE_VS_THYMIC_ST…	---	3D-structure;Acetylation;Completeproteome;Cytoplasm;Directproteinsequencing;Methyltransferase;Phosphoprotein;Polymorphism;Referenceproteome;S-adenosyl-L-methionine;Transferase			+	Control vs CFT		Thiopurine S-methyltransferase	TPMT	P51580	P51580	TPMT_HUMAN	7	277040000	20	0.23054	0.395145	-1.00206
23.9072	22.5534	23.4514	25.8655	25.5564	24.4022	22.17	25.0565	21.6995	23.1613	22.9749	22.3548	24.3086	25.8317	22.7255	23.6431	22.3494	23.3951	22.7938	21.3515	24.4253	23.3453	19.7756	22.5034	21.9962	19.7171	20.1429	actin cytoskeleton organization;actin filament-based process;biological regulation;cellular component movement;cellular component organization;cellular component organization at cellular level;cellular component organization or biogenesis;cellular component organization or biogenesis at cellular level;cellular process;cellular response to stimulus;cytoskeleton organization;developmental process;i…	catalytic activity;enzyme activator activity;enzyme regulator activity;GDP-dissociation inhibitor activity;GTPase activator activity;GTPase activity;GTPase regulator activity;hydrolase activity;hydrolase activity, acting on acid anhydrides;hydrolase activity, acting on acid anhydrides, in phosphorus-containing anhydrides;nucleoside-triphosphatase activity;nucleoside-triphosphatase regulator activ…	cell part;cytoplasm;cytoplasmic membrane-bounded vesicle;cytoplasmic part;cytoplasmic vesicle;cytoskeleton;cytosol;extracellular membrane-bounded organelle;extracellular organelle;extracellular region part;extracellular vesicular exosome;intracellular membrane-bounded organelle;intracellular non-membrane-bounded organelle;intracellular organelle;intracellular part;membrane-bounded organelle;membr…	Neurotrophin signaling pathway;Vasopressin-regulated water reabsorption	ACEVEDO_LIVER_CANCER_WITH_H3K27ME3_UP;ACTIN_CYTOSKELETON_ORGANIZATION_AND_BIOGENESIS;ACTIN_FILAMENT_BASED_PROCESS;AZARE_NEOPLASTIC_TRANSFORMATION_BY_STAT3_DN;BENPORATH_CYCLING_GENES;BIOCARTA_CASPASE_PATHWAY;BIOCARTA_D4GDI_PATHWAY;BIOCARTA_FAS_PATHWAY;BIOCARTA_HIVNEF_PATHWAY;BIOCARTA_TNFR1_PATHWAY;BOQUEST_STEM_CELL_CULTURED_VS_FRESH_UP;BOYAULT_LIVER_CANCER_SUBCLASS_G5_DN;BUYTAERT_PHOTODYNAMIC_THER…	---	3D-structure;Acetylation;Completeproteome;Cytoplasm;Directproteinsequencing;GTPaseactivation;Phosphoprotein;Referenceproteome			+	Control vs CFT		Rho GDP-dissociation inhibitor 2	ARHGDIB	P52566	P52566	GDIR2_HUMAN	5	712360000	87	0.0784523	0.19805	1.07123
23.8765	24.5086	24.5462	24.0752	23.4974	24.2703	23.7318	24.5941	18.8511	25.5467	25.0855	23.8892	20.013	24.503	25.0086	24.3923	24.2741	24.8625	25.1405	23.6263	18.9998	19.1175	19.6206	25.2956	24.0106	19.7195	24.2868	actin cytoskeleton organization;actin filament depolymerization;actin filament organization;actin filament severing;actin filament-based process;actin polymerization or depolymerization;biological regulation;cellular component disassembly;cellular component disassembly at cellular level;cellular component organization;cellular component organization at cellular level;cellular component organizati…		actin cytoskeleton;cell cortex part;cell part;cortical actin cytoskeleton;cortical cytoskeleton;cytoplasmic part;cytoskeletal part;cytoskeleton;extracellular membrane-bounded organelle;extracellular organelle;extracellular region part;extracellular vesicular exosome;intracellular non-membrane-bounded organelle;intracellular organelle;intracellular organelle part;intracellular part;membrane-bounde…		AAANWWTGC_UNKNOWN;ACTIN_CYTOSKELETON_ORGANIZATION_AND_BIOGENESIS;ACTIN_FILAMENT_BASED_PROCESS;ACTIN_POLYMERIZATION_AND_OR_DEPOLYMERIZATION;ARGGGTTAA_UNKNOWN;BAELDE_DIABETIC_NEPHROPATHY_DN;BAKKER_FOXO3_TARGETS_UP;BROWN_MYELOID_CELL_DEVELOPMENT_UP;BURTON_ADIPOGENESIS_8;CAGGTG_V$E12_Q6;CELLULAR_MACROMOLECULE_METABOLIC_PROCESS;chr20p12;CHYLA_CBFA2T3_TARGETS_UP;CTGCAGY_UNKNOWN;CYTOSKELETON_ORGANIZATIO…	---	Acetylation;Actin-binding;Alternativesplicing;Completeproteome;Directproteinsequencing;Phosphoprotein;Polymorphism;Referenceproteome;Ublconjugation			+	Control vs CFT		Destrin	DSTN	P60981	P60981	DEST_HUMAN	5	847490000	89	0.631907	0.783036	0.371441
24.2595	24.4003	24.4244	24.9297	24.6858	24.4103	23.7782	24.702	23.4079	23.1702	18.438	23.5279	23.7586	24.0668	23.955	22.8008	23.1445	23.9724	23.5039	23.1701	23.4749	24.1303	23.9781	23.6812	23.966	23.8674	23.3928	activation of immune response;activation of innate immune response;antigen receptor-mediated signaling pathway;biological regulation;catabolic process;cell surface receptor linked signaling pathway;cellular catabolic process;cellular component organization;cellular component organization at cellular level;cellular component organization or biogenesis;cellular component organization or biogenesis …	acid-amino acid ligase activity;adenyl nucleotide binding;adenyl ribonucleotide binding;ATP binding;binding;catalytic activity;enzyme binding;ligase activity;ligase activity, forming carbon-nitrogen bonds;nucleotide binding;protein binding;purine nucleotide binding;purine ribonucleoside triphosphate binding;purine ribonucleotide binding;ribonucleotide binding;small conjugating protein binding;sma…	cell part;cytoplasm;cytoplasmic part;cytosol;extracellular membrane-bounded organelle;extracellular organelle;extracellular region part;extracellular vesicular exosome;intracellular membrane-bounded organelle;intracellular organelle;intracellular part;macromolecular complex;membrane-bounded organelle;membrane-bounded vesicle;nucleus;organelle;protein complex;UBC13-MMS2 complex;UBC13-UEV1A complex…	Ubiquitin mediated proteolysis	ACCATTT,MIR-522;ACEVEDO_LIVER_CANCER_UP;ACEVEDO_LIVER_TUMOR_VS_NORMAL_ADJACENT_TISSUE_UP;ACTAYRNNNCCCR_UNKNOWN;ACTGTGA,MIR-27A,MIR-27B;ACTIVATION_OF_IMMUNE_RESPONSE;ACTIVATION_OF_NF_KAPPAB_TRANSCRIPTION_FACTOR;AGTCTTA,MIR-499;ATGAAGG,MIR-205;BAE_BRCA1_TARGETS_UP;BCAT_GDS748_UP;BIOPOLYMER_CATABOLIC_PROCESS;BIOPOLYMER_METABOLIC_PROCESS;BIOPOLYMER_MODIFICATION;BLALOCK_ALZHEIMERS_DISEASE_DN;BLUM_RESP…	---	3D-structure;Acetylation;ATP-binding;Completeproteome;Cytoplasm;Directproteinsequencing;Disulfidebond;DNAdamage;DNArepair;Isopeptidebond;Ligase;Nucleotide-binding;Nucleus;Referenceproteome;Ublconjugation;Ublconjugationpathway			+	Control vs CFT		Ubiquitin-conjugating enzyme E2 N;Putative ubiquitin-conjugating enzyme E2 N-like	UBE2N;UBE2NL	P61088;Q5JXB2	P61088;Q5JXB2	UBE2N_HUMAN;UE2NL_HUMAN	6	634250000	104	0.0221595	0.0862591	1.37243
27.1754	27.429	27.5943	27.7529	27.6829	27.3309	26.558	27.7732	26.0313	27.197	26.1446	27.0304	27.2815	28.2294	27.0841	26.8208	27.2343	26.8289	26.8274	26.7832	25.64	25.4598	26.6603	26.6495	27.3236	26.68	26.8584	antigen processing and presentation;antigen processing and presentation of exogenous antigen;antigen processing and presentation of exogenous peptide antigen;antigen processing and presentation of exogenous peptide antigen via MHC class II;antigen processing and presentation of peptide antigen;antigen processing and presentation of peptide antigen via MHC class II;antigen processing and presentat…	binding;catalytic activity;GTP binding;GTPase activity;guanyl nucleotide binding;guanyl ribonucleotide binding;hydrolase activity;hydrolase activity, acting on acid anhydrides;hydrolase activity, acting on acid anhydrides, in phosphorus-containing anhydrides;molecular transducer activity;nucleoside-triphosphatase activity;nucleotide binding;purine nucleotide binding;purine ribonucleoside triphosp…	adherens junction;anchoring junction;cell junction;cell leading edge;cell part;cell projection;cell-substrate adherens junction;cell-substrate junction;contractile fiber part;cytoplasmic part;cytoskeletal part;cytosol;extracellular membrane-bounded organelle;extracellular organelle;extracellular region part;extracellular vesicular exosome;focal adhesion;Golgi apparatus part;Golgi membrane;intrace…	Vibrio cholerae infection	AACTTT_UNKNOWN;AAGCACT,MIR-520F;AAGWWRNYGGC_UNKNOWN;ACATTCC,MIR-1,MIR-206;ACAWNRNSRCGG_UNKNOWN;ACEVEDO_LIVER_CANCER_UP;ACEVEDO_LIVER_TUMOR_VS_NORMAL_ADJACENT_TISSUE_UP;AGUIRRE_PANCREATIC_CANCER_COPY_NUMBER_DN;APRELIKOVA_BRCA1_TARGETS;BACOLOD_RESISTANCE_TO_ALKYLATING_AGENTS_DN;BAKKER_FOXO3_TARGETS_DN;BENPORATH_MYC_TARGETS_WITH_EBOX;BENPORATH_NANOG_TARGETS;BENPORATH_PROLIFERATION;BENPORATH_SOX2_TAR…	---	3D-structure;Acetylation;Alternativesplicing;Celljunction;Cellmembrane;Completeproteome;Cytoplasm;Directproteinsequencing;ER-Golgitransport;Golgiapparatus;GTP-binding;Lipoprotein;Membrane;Myristate;Nucleotide-binding;Postsynapticcellmembrane;Proteintransport;Referenceproteome;Synapse;Synaptosome;Transport			+	Control vs CFT		ADP-ribosylation factor 1;ADP-ribosylation factor 3	ARF1;ARF3	P84077;P61204	P84077;P61204	ARF1_HUMAN;ARF3_HUMAN	9	6707600000	734	0.0651931	0.272926	0.454333
27.766	27.7764	28.2596	27.83	28.2933	27.5447	27.3602	28.412	26.3824	26.6693	27.2764	27.6675	27.9859	27.8199	27.6193	27.0003	27.2738	26.9935	27.4808	26.5369	27.2664	25.776	27.4383	27.1922	27.1134	27.3465	26.6721	anatomical structure development;biological regulation;blood coagulation;cell activation;cell development;cell proliferation;cellular developmental process;cellular process;cellular response to cAMP;cellular response to chemical stimulus;cellular response to organic substance;cellular response to stimulus;coagulation;developmental process;endothelial cell development;epithelial cell development;e…	binding;catalytic activity;GDP binding;GTP binding;GTPase activity;guanyl nucleotide binding;guanyl ribonucleotide binding;hydrolase activity;hydrolase activity, acting on acid anhydrides;hydrolase activity, acting on acid anhydrides, in phosphorus-containing anhydrides;nucleoside-triphosphatase activity;nucleotide binding;protein binding;protein complex binding;purine nucleotide binding;purine r…	cell junction;cell part;cell-cell junction;cytoplasmic part;cytosol;extracellular membrane-bounded organelle;extracellular organelle;extracellular region part;extracellular vesicular exosome;intracellular;intracellular part;lipid particle;membrane;membrane-bounded organelle;membrane-bounded vesicle;organelle;plasma membrane;vesicle	Chemokine signaling pathway;Focal adhesion;Leukocyte transendothelial migration;Long-term potentiation;MAPK signaling pathway;Neurotrophin signaling pathway;Pancreatic secretion;Renal cell carcinoma	AACTTT_UNKNOWN;AAGTCCA,MIR-422B,MIR-422A;AGCGCTT,MIR-518F,MIR-518E,MIR-518A;AGCTCCT,MIR-28;AGUIRRE_PANCREATIC_CANCER_COPY_NUMBER_DN;ATGTTAA,MIR-302C;ATGTTTC,MIR-494;BIOCARTA_EPHA4_PATHWAY;BIOCARTA_MET_PATHWAY;BORCZUK_MALIGNANT_MESOTHELIOMA_UP;BYSTRYKH_HEMATOPOIESIS_STEM_CELL_AND_BRAIN_QTL_TRANS;CACTGTG,MIR-128A,MIR-128B;CAGTATT,MIR-200B,MIR-200C,MIR-429;chr12q14;CTGAGCC,MIR-24;CTTTGT_V$LEF1_Q2;CT…	---	3D-structure;ADP-ribosylation;Alternativesplicing;Celljunction;Cellmembrane;Completeproteome;Cytoplasm;Directproteinsequencing;GTP-binding;Lipoprotein;Membrane;Methylation;Nucleotide-binding;Phosphoprotein;Prenylation;Referenceproteome			+	Control vs CFT		Ras-related protein Rap-1b;Ras-related protein Rap-1b-like protein	RAP1B	P61224;A6NIZ1	P61224;A6NIZ1	RAP1B_HUMAN	12	7059400000	361	0.00520612	0.0803575	0.679775
26.6126	26.3565	27.2489	26.3752	27.0076	27.5231	26.9565	27.6571	26.5497	26.4302	26.2599	26.0749	26.2133	25.8309	26.5399	26.0627	25.9405	24.7425	27.2711	25.2745	24.8332	24.7656	26.6976	26.2297	26.8593	26.2606	25.7783	activation of adenylate cyclase activity;activation of adenylate cyclase activity by dopamine receptor signaling pathway;activation of adenylate cyclase activity by G-protein signaling pathway;activation of phospholipase C activity;activation of phospholipase C activity by G-protein coupled receptor protein signaling pathway coupled to IP3 second messenger;anatomical structure development;apoptos…	binding;catalytic activity;enzyme binding;GTPase activity;GTPase binding;hydrolase activity;hydrolase activity, acting on acid anhydrides;hydrolase activity, acting on acid anhydrides, in phosphorus-containing anhydrides;molecular transducer activity;nucleoside-triphosphatase activity;protein binding;protein complex binding;pyrophosphatase activity;signal transducer activity	cell body;cell part;cell projection;cell projection part;cilium part;cytoplasmic part;dendrite;extracellular membrane-bounded organelle;extracellular organelle;extracellular region part;extracellular vesicular exosome;extrinsic to internal side of plasma membrane;extrinsic to membrane;extrinsic to plasma membrane;heterotrimeric G-protein complex;intracellular;intracellular organelle part;intracel…	Chemokine signaling pathway;Phototransduction;Taste transduction	AACTTT_UNKNOWN;AAGCACA,MIR-218;ATAACCT,MIR-154;ATGTACA,MIR-493;BAUS_TFF2_TARGETS_UP;BENPORATH_CYCLING_GENES;BIOCARTA_AGPCR_PATHWAY;BIOCARTA_BARR_MAPK_PATHWAY;BIOCARTA_BARRESTIN_PATHWAY;BIOCARTA_BARRESTIN_SRC_PATHWAY;BIOCARTA_BIOPEPTIDES_PATHWAY;BIOCARTA_CCR3_PATHWAY;BIOCARTA_CSK_PATHWAY;BIOCARTA_CXCR4_PATHWAY;BIOCARTA_EDG1_PATHWAY;BIOCARTA_ERK_PATHWAY;BIOCARTA_FMLP_PATHWAY;BIOCARTA_GCR_PATHWAY;BI…	---	3D-structure;Acetylation;Alternativesplicing;Completeproteome;Directproteinsequencing;Phosphoprotein;Polymorphism;Referenceproteome;Repeat;Transducer;WDrepeat			+	Control vs CFT		Guanine nucleotide-binding protein G(I)/G(S)/G(T) subunit beta-1	GNB1	P62873;P16520	P62873	GBB1_HUMAN	15	3689800000	188	0.00468368	0.0586479	0.868013
28.7231	28.9362	28.7892	28.5381	29.0756	28.716	28.88	29.0707	28.8631	28.3707	27.3438	27.8647	29.0111	28.4917	28.1057	27.0434	26.8124	28.2999	28.3522	27.7436	27.7467	28.8519	27.6994	28.0333	28.4751	28.6421	27.7411	biological regulation;biosynthetic process;blood coagulation;cell activation;cell migration;cell motility;cellular biosynthetic process;cellular component assembly;cellular component assembly at cellular level;cellular component movement;cellular component organization;cellular component organization at cellular level;cellular component organization or biogenesis;cellular component organization o…	binding;catalytic activity;cis-trans isomerase activity;isomerase activity;peptide binding;peptidyl-prolyl cis-trans isomerase activity;protein binding;unfolded protein binding;virion binding	adherens junction;anchoring junction;cell junction;cell part;cell-substrate adherens junction;cell-substrate junction;cytoplasm;cytoplasmic part;cytosol;extracellular membrane-bounded organelle;extracellular organelle;extracellular region;extracellular region part;extracellular space;extracellular vesicular exosome;focal adhesion;intracellular membrane-bounded organelle;intracellular organelle;in…		ACEVEDO_LIVER_CANCER_UP;ACEVEDO_LIVER_TUMOR_VS_NORMAL_ADJACENT_TISSUE_UP;ACEVEDO_METHYLATED_IN_LIVER_CANCER_DN;AMIT_EGF_RESPONSE_480_HELA;BENPORATH_MYC_MAX_TARGETS;BIOCARTA_IL2RB_PATHWAY;BLALOCK_ALZHEIMERS_DISEASE_DN;BRACHAT_RESPONSE_TO_CAMPTOTHECIN_DN;BRACHAT_RESPONSE_TO_METHOTREXATE_DN;CAGGTA_V$AREB6_01;CAMPS_COLON_CANCER_COPY_NUMBER_DN;CELLULAR_MACROMOLECULE_METABOLIC_PROCESS;CELLULAR_PROTEIN_…	---	3D-structure;Acetylation;Alternativesplicing;Completeproteome;Cyclosporin;Cytoplasm;Directproteinsequencing;Glycoprotein;Host-virusinteraction;Isomerase;Isopeptidebond;Phosphoprotein;Referenceproteome;Rotamase;Secreted;Ublconjugation			+	Control vs CFT		Peptidyl-prolyl cis-trans isomerase A;Peptidyl-prolyl cis-trans isomerase A, N-terminally processed	PPIA	P62937;P0DN26;A0A0B4J2A2;A0A075B759;Q9Y536;F5H284;P0DN37	P62937	PPIA_HUMAN	10	14412000000	447	0.00444803	0.0609189	0.81592
22.6496	18.767	22.6417	22.8089	23.3568	22.9123	23.1595	22.5781	22.311	22.5731	22.2239	22.621	23.7348	24.7366	22.6029	23.7889	24.3981	23.791	23.4707	22.2401	18.6629	18.3917	21.5181	19.7192	23.0184	19.8434	18.0082	biological adhesion;calcium-independent cell-cell adhesion;cell adhesion;cell-cell adhesion;cellular process;establishment of localization;ion transport;transport	binding;identical protein binding;protein binding;structural molecule activity	cell junction;cell part;cell-cell junction;cytoplasm;integral to membrane;intracellular part;intrinsic to membrane;membrane;membrane part;occluding junction;plasma membrane;tight junction	Cell adhesion molecules (CAMs);Hepatitis C;Leukocyte transendothelial migration;Tight junction	APICAL_JUNCTION_COMPLEX;APICOLATERAL_PLASMA_MEMBRANE;BLALOCK_ALZHEIMERS_DISEASE_DN;BLALOCK_ALZHEIMERS_DISEASE_INCIPIENT_DN;BONOME_OVARIAN_CANCER_SURVIVAL_OPTIMAL_DEBULKING;CALCIUM_INDEPENDENT_CELL_CELL_ADHESION;CELL_CELL_ADHESION;CELL_JUNCTION;chr13q31;DELYS_THYROID_CANCER_UP;DODD_NASOPHARYNGEAL_CARCINOMA_UP;FLECHNER_BIOPSY_KIDNEY_TRANSPLANT_OK_VS_DONOR_UP;FLECHNER_BIOPSY_KIDNEY_TRANSPLANT_REJECT…	---	Alternativesplicing;Celljunction;Cellmembrane;Completeproteome;Iontransport;Membrane;Referenceproteome;Tightjunction;Transmembrane;Transmembranehelix;Transport		+	+	CFNT vs CFT;Control vs CFT	+	Claudin-10	CLDN10	P78369	P78369	CLD10_HUMAN	3	282200000	49	0.123811	0.279253	-0.848435
28.1537	26.7745	27.6994	27.5902	28.8682	27.48	27.0237	28.722	25.0298	25.3242	26.073	25.8005	29.2047	27.7081	27.1685	27.3369	24.9901	27.3352	26.6071	24.4459	27.1255	23.865	27.6244	25.841	26.4997	27.3532	24.9799	anatomical structure development;anatomical structure morphogenesis;anterior/posterior pattern specification;biological regulation;cell differentiation;cell differentiation involved in kidney development;cell morphogenesis;cell morphogenesis involved in differentiation;cellular component morphogenesis;cellular component organization;cellular component organization or biogenesis;cellular developme…	binding;DNA binding;nucleic acid binding;protein binding;protein binding transcription factor activity;protein domain specific binding;regulatory region DNA binding;regulatory region nucleic acid binding;transcription cofactor activity;transcription corepressor activity;transcription factor binding transcription factor activity;transcription regulatory region DNA binding	cell junction;cell part;cell projection part;cytoplasm;cytoskeleton;extracellular membrane-bounded organelle;extracellular organelle;extracellular region part;extracellular vesicular exosome;growth cone;intracellular membrane-bounded organelle;intracellular non-membrane-bounded organelle;intracellular organelle;intracellular organelle part;intracellular part;membrane;membrane-bounded organelle;me…		AACATTC,MIR-409-3P;AACTTT_UNKNOWN;ACEVEDO_FGFR1_TARGETS_IN_PROSTATE_CANCER_MODEL_UP;ATGTACA,MIR-493;BCAT_GDS748_DN;BEIER_GLIOMA_STEM_CELL_DN;BOQUEST_STEM_CELL_UP;BOYLAN_MULTIPLE_MYELOMA_C_D_DN;BOYLAN_MULTIPLE_MYELOMA_PCA1_UP;CAGTATT,MIR-200B,MIR-200C,MIR-429;CAIRO_LIVER_DEVELOPMENT_UP;CATTGTYY_V$SOX9_B1;CHANDRAN_METASTASIS_TOP50_UP;CHANDRAN_METASTASIS_UP;CHARAFE_BREAST_CANCER_LUMINAL_VS_MESENCHYM…	---	Alternativesplicing;Cellmembrane;Cellprojection;Completeproteome;Directproteinsequencing;Lipoprotein;Membrane;Myristate;Phosphoprotein;Polymorphism;Referenceproteome			+	Control vs CFT		Brain acid soluble protein 1	BASP1	P80723	P80723	BASP1_HUMAN	18	5701900000	498	0.0206246	0.0836559	1.3703
31.3068	30.0697	29.54	29.8453	29.9347	30.5876	30.9025	29.3819	29.0965	25.5151	28.0038	27.7332	25.0655	29.2421	29.551	30.7271	28.9948	30.17	29.5014	29.5021	30.087	26.3245	28.151	29.495	28.0169	27.6228	28.0966	amine metabolic process;aminoglycan biosynthetic process;aminoglycan catabolic process;aminoglycan metabolic process;anatomical structure development;anatomical structure formation involved in morphogenesis;anatomical structure morphogenesis;angiogenesis;biological regulation;biosynthetic process;brain development;carbohydrate biosynthetic process;carbohydrate catabolic process;carbohydrate metab…	binding;cation binding;ion binding;metal ion binding;protein binding;protein C-terminus binding	adherens junction;anchoring junction;basal lamina;cell junction;cell part;cell-substrate adherens junction;cell-substrate junction;cytoplasmic part;extracellular matrix;extracellular matrix part;extracellular membrane-bounded organelle;extracellular organelle;extracellular region;extracellular region part;extracellular space;extracellular vesicular exosome;focal adhesion;Golgi apparatus part;Golg…	ECM-receptor interaction	AACTTT_UNKNOWN;AZARE_NEOPLASTIC_TRANSFORMATION_BY_STAT3_UP;BERTUCCI_MEDULLARY_VS_DUCTAL_BREAST_CANCER_DN;BONCI_TARGETS_OF_MIR15A_AND_MIR16_1;BROWNE_HCMV_INFECTION_48HR_DN;CATTGTYY_V$SOX9_B1;CCCNNNNNNAAGWT_UNKNOWN;chr1p36;CSR_EARLY_UP.V1_DN;CYCLIN_D1_KE_.V1_UP;CYCLIN_D1_UP.V1_UP;CYTAGCAAY_UNKNOWN;DIAZ_CHRONIC_MEYLOGENOUS_LEUKEMIA_UP;GAGCCTG,MIR-484;GCNP_SHH_UP_LATE.V1_DN;GGARNTKYCCA_UNKNOWN;GGCAGC…	NABA_CORE_MATRISOME_Yes	3D-structure;Angiogenesis;Basementmembrane;Calcium;Completeproteome;Directproteinsequencing;Diseasemutation;Disulfidebond;EGF-likedomain;Extracellularmatrix;Glycoprotein;Heparansulfate;Immunoglobulindomain;LamininEGF-likedomain;Metal-binding;Polymorphism;Proteoglycan;Referenceproteome;Repeat;Secreted;Signal			+	Control vs CFT		Basement membrane-specific heparan sulfate proteoglycan core protein;Endorepellin;LG3 peptide	HSPG2	P98160	P98160	PGBM_HUMAN	62	32907000000	1749	0.0240628	0.0835556	1.60418
18.5705	20.8518	19.9969	18.5178	20.1169	19.9146	18.6563	21.1212	21.2418	24.821	20.4467	19.2857	20.1017	19.4606	21.1046	18.5881	21.2568	19.1213	19.9317	21.2337	21.586	20.874	20.9301	20.7586	21.3831	21.1977	21.9079	alcohol metabolic process;carbohydrate metabolic process;cellular carbohydrate metabolic process;cellular metabolic process;cellular process;galactose metabolic process;hexose metabolic process;metabolic process;monosaccharide metabolic process;primary metabolic process;small molecule metabolic process	adenyl nucleotide binding;adenyl ribonucleotide binding;ATP binding;binding;carbohydrate kinase activity;catalytic activity;galactokinase activity;kinase activity;N-acetylgalactosamine kinase activity;nucleotide binding;phosphotransferase activity, alcohol group as acceptor;purine nucleotide binding;purine ribonucleoside triphosphate binding;purine ribonucleotide binding;ribonucleotide binding;tr…	cell part;cytoplasm;intracellular part	Amino sugar and nucleotide sugar metabolism;Galactose metabolism	BENPORATH_NANOG_TARGETS;BERENJENO_TRANSFORMED_BY_RHOA_DN;BROWNE_HCMV_INFECTION_30MIN_DN;BROWNE_HCMV_INFECTION_4HR_DN;BURTON_ADIPOGENESIS_9;CARBOHYDRATE_KINASE_ACTIVITY;CHEN_NEUROBLASTOMA_COPY_NUMBER_GAINS;chr15q21;CHYLA_CBFA2T3_TARGETS_UP;CTTTGT_V$LEF1_Q2;DACOSTA_UV_RESPONSE_VIA_ERCC3_DN;DACOSTA_UV_RESPONSE_VIA_ERCC3_TTD_DN;FIRESTEIN_PROLIFERATION;GGGAGGRR_V$MAZ_Q6;GSE15930_STIM_VS_STIM_AND_IFNAB…	---	3D-structure;Alternativesplicing;ATP-binding;Completeproteome;Kinase;Nucleotide-binding;Polymorphism;Referenceproteome;Transferase			+	Control vs CFT		N-acetylgalactosamine kinase	GALK2	Q01415	Q01415	GALK2_HUMAN	3	112860000	22	0.218255	0.394941	-0.831226
24.1899	23.0283	23.5117	22.0342	22.8731	23.533	24.3933	22.6834	22.8208	24.2707	22.7373	21.7591	19.2142	21.9487	22.2246	21.7744	22.3281	21.1487	22.9487	23.9367	22.9245	20.3493	21.9342	22.8449	22.9665	21.5047	19.289	lipid metabolic process;metabolic process;primary metabolic process	binding;catalytic activity;hydrolase activity;hydrolase activity, acting on carbon-nitrogen (but not peptide) bonds;protein binding;transcription factor binding	cell part;cytoplasm;cytoplasmic part;extracellular membrane-bounded organelle;extracellular organelle;extracellular region part;extracellular vesicular exosome;intracellular membrane-bounded organelle;intracellular organelle;intracellular part;lysosome;lytic vacuole;membrane-bounded organelle;membrane-bounded vesicle;organelle;vacuole;vesicle		AATGGAG,MIR-136;BROWNE_HCMV_INFECTION_16HR_DN;BRUINS_UVC_RESPONSE_VIA_TP53_GROUP_A;BUYTAERT_PHOTODYNAMIC_THERAPY_STRESS_DN;chr4q21;CYTOPLASM;DEURIG_T_CELL_PROLYMPHOCYTIC_LEUKEMIA_UP;ESC_J1_UP_EARLY.V1_UP;FARMER_BREAST_CANCER_APOCRINE_VS_BASAL;FARMER_BREAST_CANCER_APOCRINE_VS_LUMINAL;FULCHER_INFLAMMATORY_RESPONSE_LECTIN_VS_LPS_UP;GNF2_CASP1;GRAESSMANN_APOPTOSIS_BY_SERUM_DEPRIVATION_DN;GRAESSMANN_R…	---	Alternativesplicing;Autocatalyticcleavage;Completeproteome;Directproteinsequencing;Glycoprotein;Hydrolase;Lysosome;Polymorphism;Referenceproteome;Signal;Zymogen			+	Control vs CFT		N-acylethanolamine-hydrolyzing acid amidase;N-acylethanolamine-hydrolyzing acid amidase subunit alpha;N-acylethanolamine-hydrolyzing acid amidase subunit beta	NAAA	Q02083	Q02083	NAAA_HUMAN	5	333040000	55	0.0647473	0.18288	1.02153
22.8655	22.5902	23.7284	22.4376	20.4945	23.1399	19.0546	18.0042	22.9822	25.0584	19.3378	19.3665	20.4973	24.7758	24.4982	23.6605	23.1327	22.735	19.2631	23.6218	24.6096	24.6509	24.0653	24.0334	23.9442	22.7986	25.1736	cellular metabolic process;cellular process;defense response;heterocycle metabolic process;inflammatory response;metabolic process;reactive oxygen species metabolic process;response to stimulus;response to stress;response to wounding;small molecule metabolic process;vitamin B6 metabolic process;vitamin metabolic process;water-soluble vitamin metabolic process	2 iron, 2 sulfur cluster binding;aldehyde oxidase activity;binding;catalytic activity;cation binding;coenzyme binding;cofactor binding;electron carrier activity;flavin adenine dinucleotide binding;ion binding;iron ion binding;iron-sulfur cluster binding;metal cluster binding;metal ion binding;molybdopterin cofactor binding;NAD binding;nucleotide binding;oxidoreductase activity;oxidoreductase acti…	cell part;cytoplasm;cytoplasmic part;cytosol;extracellular membrane-bounded organelle;extracellular organelle;extracellular region part;extracellular vesicular exosome;intracellular part;membrane-bounded organelle;membrane-bounded vesicle;organelle;vesicle	Drug metabolism - cytochrome P450;Nicotinate and nicotinamide metabolism;Tryptophan metabolism;Tyrosine metabolism;Valine, leucine and isoleucine degradation;Vitamin B6 metabolism	AZARE_NEOPLASTIC_TRANSFORMATION_BY_STAT3_DN;BOQUEST_STEM_CELL_UP;BORCZUK_MALIGNANT_MESOTHELIOMA_DN;BROWNE_HCMV_INFECTION_48HR_DN;BRUINS_UVC_RESPONSE_VIA_TP53_GROUP_A;CAIRO_HEPATOBLASTOMA_CLASSES_DN;CHEMNITZ_RESPONSE_TO_PROSTAGLANDIN_E2_DN;CHIANG_LIVER_CANCER_SUBCLASS_CTNNB1_UP;CHIANG_LIVER_CANCER_SUBCLASS_PROLIFERATION_DN;CHIARADONNA_NEOPLASTIC_TRANSFORMATION_CDC25_UP;chr2q33;CREIGHTON_ENDOCRINE_…	---	2Fe-2S;Completeproteome;Cytoplasm;FAD;Flavoprotein;Iron;Iron-sulfur;Metal-binding;Molybdenum;Oxidoreductase;Phosphoprotein;Polymorphism;Referenceproteome			+	Control vs CFT		Aldehyde oxidase	AOX1	Q06278	Q06278	AOXA_HUMAN	10	535860000	69	0.388494	0.574448	-0.871412
22.4177	24.0898	21.9371	23.5776	22.5394	23.1988	22.8797	22.0309	22.4019	22.2118	20.2849	22.2071	20.2855	21.9875	22.9575	22.8357	20.9364	21.8578	20.7262	22.6713	23.0325	18.3142	18.7524	22.6127	23.2158	18.7523	20.4645	activation of protein kinase activity;activation of protein kinase C activity by G-protein coupled receptor protein signaling pathway;aging;alcohol metabolic process;anatomical structure morphogenesis;aorta morphogenesis;apoptotic cell clearance;artery morphogenesis;biological regulation;blood vessel morphogenesis;cell proliferation;cell surface receptor linked signaling pathway;cellular componen…	apolipoprotein binding;binding;calcium ion binding;cation binding;ion binding;lipoprotein particle receptor binding;lipoprotein transporter activity;metal ion binding;protein binding;protein complex binding;protein transporter activity;receptor activity;receptor binding;substrate-specific transporter activity;transporter activity	adherens junction;anchoring junction;cell body;cell junction;cell part;cell projection;cell-substrate adherens junction;cell-substrate junction;clathrin-coated vesicle;coated pit;coated vesicle;cytoplasm;cytoplasmic membrane-bounded vesicle;cytoplasmic part;cytoplasmic vesicle;cytoplasmic vesicle membrane;cytoplasmic vesicle part;dendrite;endocytic vesicle membrane;endosome;focal adhesion;integra…	Alzheimer's disease;Malaria	AACTTT_UNKNOWN;ABE_INNER_EAR;ATGAAGG,MIR-205;ATGCTGC,MIR-103,MIR-107;BLUM_RESPONSE_TO_SALIRASIB_UP;BOCHKIS_FOXA2_TARGETS;BOQUEST_STEM_CELL_UP;BRUINS_UVC_RESPONSE_EARLY_LATE;BRUINS_UVC_RESPONSE_VIA_TP53_GROUP_B;CAGCTG_V$AP4_Q5;CAGTATT,MIR-200B,MIR-200C,MIR-429;CAIRO_LIVER_DEVELOPMENT_DN;CALCIUM_ION_BINDING;CATION_BINDING;CCANNAGRKGGC_UNKNOWN;CCCNNGGGAR_V$OLF1_01;CELL_FRACTION;CELL_PROLIFERATION_GO…	---	3D-structure;Acetylation;Alternativesplicing;Calcium;Cellmembrane;Coatedpit;Completeproteome;Cytoplasm;Developmentalprotein;Directproteinsequencing;Disulfidebond;EGF-likedomain;Endocytosis;Glycoprotein;Membrane;Metal-binding;Nucleus;Phosphoprotein;Polymorphism;Receptor;Referenceproteome;Repeat;Signal;Transmembrane;Transmembranehelix			+	Control vs CFT		Prolow-density lipoprotein receptor-related protein 1;Low-density lipoprotein receptor-related protein 1 85 kDa subunit;Low-density lipoprotein receptor-related protein 1 515 kDa subunit;Low-density lipoprotein receptor-related protein 1 intracellular domain	LRP1	Q07954	Q07954	LRP1_HUMAN	10	244570000	38	0.0187265	0.0901538	1.05357
26.1859	25.5444	25.7484	26.5282	25.6929	26.4789	26.8625	25.7009	26.0149	26.1197	23.7402	23.2782	19.7483	25.3099	25.0262	23.7445	24.4948	25.4448	24.9062	25.5563	25.183	24.3697	23.9258	25.6432	25.0171	25.2087	25.7528	carbohydrate metabolic process;cellular carbohydrate metabolic process;cellular macromolecule metabolic process;cellular metabolic process;cellular process;cellular protein metabolic process;glycosylation;macromolecule glycosylation;macromolecule metabolic process;macromolecule modification;metabolic process;peptidyl-amino acid modification;peptidyl-asparagine modification;post-translational prot…	acetylglucosaminyltransferase activity;alpha-1,6-mannosylglycoprotein 6-beta-N-acetylglucosaminyltransferase activity;catalytic activity;transferase activity;transferase activity, transferring glycosyl groups;transferase activity, transferring hexosyl groups;UDP-glycosyltransferase activity	cell part;cytoplasmic part;extracellular membrane-bounded organelle;extracellular organelle;extracellular region part;extracellular vesicular exosome;Golgi apparatus part;Golgi membrane;integral to membrane;intracellular organelle part;intracellular part;intrinsic to membrane;membrane;membrane part;membrane-bounded organelle;membrane-bounded vesicle;organelle;organelle membrane;organelle part;ves…	N-Glycan biosynthesis	ACEVEDO_FGFR1_TARGETS_IN_PROSTATE_CANCER_MODEL_UP;BROWN_MYELOID_CELL_DEVELOPMENT_DN;CAIRO_LIVER_DEVELOPMENT_UP;chr2q21;CUI_TCF21_TARGETS_2_DN;CYCLIN_D1_KE_.V1_UP;CYCLIN_D1_UP.V1_UP;DACOSTA_UV_RESPONSE_VIA_ERCC3_COMMON_DN;DEBIASI_APOPTOSIS_BY_REOVIRUS_INFECTION_DN;FORTSCHEGGER_PHF8_TARGETS_UP;GRADE_COLON_CANCER_UP;GSE12845_NAIVE_VS_DARKZONE_GC_TONSIL_BCELL_UP;GSE17721_0.5H_VS_4H_LPS_BMDM_DN;GSE177…	---	Completeproteome;Glycoprotein;Glycosyltransferase;Golgiapparatus;Membrane;Referenceproteome;Signal-anchor;Transferase;Transmembrane;Transmembranehelix			+	Control vs CFT		Alpha-1,6-mannosylglycoprotein 6-beta-N-acetylglucosaminyltransferase A	MGAT5	Q09328	Q09328	MGT5A_HUMAN	16	2028600000	217	0.0185853	0.0692781	1.6441
23.5752	22.8658	24.0416	23.3279	24.9001	23.512	22.9555	25.0018	18.2537	23.8747	22.8306	18.956	24.3109	22.877	23.7182	19.8863	20.0344	23.6242	23.8733	19.1966	22.3565	19.0064	19.1246	22.501	23.2812	24.0825	21.3642	biological regulation;cellular process;cellular response to stimulus;intracellular signal transduction;regulation of biological process;regulation of cellular process;response to stimulus;signal transduction	binding;calcium ion binding;cation binding;ion binding;metal ion binding	cell part;cytoplasm;extracellular membrane-bounded organelle;extracellular organelle;extracellular region part;extracellular vesicular exosome;intracellular membrane-bounded organelle;intracellular organelle;intracellular part;membrane;membrane-bounded organelle;membrane-bounded vesicle;nucleus;organelle;plasma membrane;vesicle		AACTTT_UNKNOWN;BCAT_BILD_ET_AL_UP;BENPORATH_CYCLING_GENES;CALCIUM_ION_BINDING;CATION_BINDING;CHANDRAN_METASTASIS_DN;chr19p13;COLDREN_GEFITINIB_RESISTANCE_DN;CREIGHTON_ENDOCRINE_THERAPY_RESISTANCE_2;CREIGHTON_ENDOCRINE_THERAPY_RESISTANCE_3;DODD_NASOPHARYNGEAL_CARCINOMA_UP;ENGELMANN_CANCER_PROGENITORS_DN;GSE12366_GC_VS_MEMORY_BCELL_DN;GSE18791_CTRL_VS_NEWCASTLE_VIRUS_DC_14H_DN;GSE18791_UNSTIM_VS_NE…	---	3D-structure;Alternativesplicing;Calcium;Completeproteome;Cytoplasm;Metal-binding;Phosphoprotein;Polymorphism;Referenceproteome;Repeat			+	Control vs CFT		Calcyphosin	CAPS	Q13938	Q13938	CAYP1_HUMAN	7	388520000	44	0.0319106	0.0898927	1.98616
31.9279	30.1279	29.7768	30.5933	30.2515	31.143	31.141	31.1232	31.9528	29.1487	27.8945	29.0563	24.7213	30.3629	30.8602	31.1421	28.8523	29.4323	30.2856	30.394	30.4686	27.0708	29.5881	29.3253	29.052	26.0284	29.3382	acute inflammatory response;acute-phase response;amine metabolic process;aminoglycan metabolic process;biological regulation;carbohydrate metabolic process;defense response;glycosaminoglycan metabolic process;hyaluronan metabolic process;inflammatory response;macromolecule metabolic process;metabolic process;negative regulation of catalytic activity;negative regulation of endopeptidase activity;n…	endopeptidase inhibitor activity;endopeptidase regulator activity;enzyme inhibitor activity;enzyme regulator activity;peptidase inhibitor activity;peptidase regulator activity;serine-type endopeptidase inhibitor activity	blood microparticle;cell part;cytoplasm;extracellular membrane-bounded organelle;extracellular organelle;extracellular region;extracellular region part;extracellular vesicular exosome;intracellular part;membrane;membrane-bounded organelle;membrane-bounded vesicle;organelle;plasma membrane;vesicle		BLALOCK_ALZHEIMERS_DISEASE_UP;BOYAULT_LIVER_CANCER_SUBCLASS_G123_DN;CAIRO_HEPATOBLASTOMA_CLASSES_DN;CAIRO_HEPATOBLASTOMA_DN;CAIRO_LIVER_DEVELOPMENT_DN;chr3p21;CORRE_MULTIPLE_MYELOMA_UP;FEVR_CTNNB1_TARGETS_UP;GNF2_CEBPA;GNF2_CYP2B6;GNF2_GSTM1;GNF2_HPN;GNF2_HPX;GNF2_IGF1;GNF2_LCAT;GNF2_TST;GSE11864_CSF1_PAM3CYS_VS_CSF1_IFNG_PAM3CYS_IN_MAC_DN;GSE12366_GC_VS_MEMORY_BCELL_DN;GSE1460_DP_VS_CD4_THYMOCYT…	---	Acutephase;Alternativesplicing;Completeproteome;Directproteinsequencing;Disulfidebond;Glycoprotein;Polymorphism;Proteaseinhibitor;Referenceproteome;Secreted;Serineproteaseinhibitor;Signal			+	Control vs CFT		Inter-alpha-trypsin inhibitor heavy chain H4;70 kDa inter-alpha-trypsin inhibitor heavy chain H4;35 kDa inter-alpha-trypsin inhibitor heavy chain H4	ITIH4	Q14624	Q14624	ITIH4_HUMAN	37	54345000000	1829	0.0904785	0.206619	1.25199
19.4627	18.4701	19.8423	22.2711	21.7278	19.3068	19.007	21.8577	18.4661	24.554	18.1064	21.7993	19.3658	22.7166	22.7122	20.7652	23.146	22.0345	19.8713	22.0319	21.5859	27.3535	23.2577	23.7552	21.8989	23.2176	22.7358	anatomical structure formation involved in morphogenesis;apoptosis;biological regulation;cell cycle arrest;cell cycle process;cell death;cell junction assembly;cell junction organization;cell surface receptor linked signaling pathway;cell-substrate junction assembly;cellular component assembly;cellular component assembly at cellular level;cellular component disassembly;cellular component disassem…	actin binding;actin filament binding;ankyrin binding;ATPase activity;binding;calcium ion binding;catalytic activity;cation binding;cytoskeletal protein binding;hydrolase activity;hydrolase activity, acting on acid anhydrides;hydrolase activity, acting on acid anhydrides, in phosphorus-containing anhydrides;ion binding;metal ion binding;nucleoside-triphosphatase activity;protein binding;pyrophosph…	actin cytoskeleton;adherens junction;anchoring junction;cell junction;cell part;cell projection membrane;cell projection part;cell-substrate adherens junction;cell-substrate junction;contractile fiber part;costamere;cytoplasm;cytoplasmic part;cytoskeletal part;cytoskeleton;cytosol;extracellular membrane-bounded organelle;extracellular organelle;extracellular region part;extracellular vesicular ex…		AAAYRNCTG_UNKNOWN;AAGCAAT,MIR-137;ALFANO_MYC_TARGETS;AMIT_EGF_RESPONSE_480_HELA;ARGGGTTAA_UNKNOWN;BENPORATH_EED_TARGETS;BENPORATH_ES_WITH_H3K27ME3;BENPORATH_PRC2_TARGETS;BENPORATH_SUZ12_TARGETS;BILD_MYC_ONCOGENIC_SIGNATURE;BLALOCK_ALZHEIMERS_DISEASE_UP;BONCI_TARGETS_OF_MIR15A_AND_MIR16_1;BROWNE_HCMV_INFECTION_14HR_DN;BROWNE_HCMV_INFECTION_16HR_DN;BROWNE_HCMV_INFECTION_20HR_DN;BROWNE_HCMV_INFECTIO…	---	3D-structure;Acetylation;Actin-binding;Alternativesplicing;Calcium;Celljunction;Cellmembrane;Cellprojection;Coiledcoil;Completeproteome;Cytoplasm;Cytoskeleton;Directproteinsequencing;Diseasemutation;Epidermolysisbullosa;Golgiapparatus;Leucine-richrepeat;Limb-girdlemusculardystrophy;Membrane;Metal-binding;Microtubule;Phosphoprotein;Polymorphism;Referenceproteome;Repeat;SH3domain;Wntsignalingpathway			+	Control vs CFT		Plectin	PLEC	Q15149;Q9UPN3	Q15149	PLEC_HUMAN	32	515500000	63	0.217733	0.377664	-1.05426
23.5615	22.3142	22.8598	22.6767	23.8505	23.0704	22.6852	24.1179	19.0893	22.0035	22.0196	22.8532	23.5258	22.9417	22.9439	22.9667	19.0855	22.7935	23.6698	18.2978	20.2146	19.5147	22.8545	22.3186	22.5459	18.9744	17.818	ameboidal cell migration;apical junction assembly;apoptosis;biological adhesion;biological regulation;biosynthetic process;cell adhesion;cell cycle;cell death;cell division;cell junction assembly;cell junction organization;cell migration;cell motility;cell-cell junction assembly;cell-cell junction organization;cellular biosynthetic process;cellular component assembly;cellular component assembly a…	adenyl nucleotide binding;adenyl ribonucleotide binding;ATP binding;binding;catalytic activity;enzyme binding;histone deacetylase binding;kinase activity;nucleotide binding;phosphotransferase activity, alcohol group as acceptor;protein binding;protein kinase activity;protein kinase C activity;protein serine/threonine kinase activity;purine nucleotide binding;purine ribonucleoside triphosphate bin…	apical junction complex;cell division site part;cell junction;cell part;cell projection;cell-cell junction;centrosome;cleavage furrow;cytoplasm;cytoplasmic part;cytoskeletal part;cytoskeleton;cytosol;intermediate filament cytoskeleton;intracellular membrane-bounded organelle;intracellular non-membrane-bounded organelle;intracellular organelle;intracellular organelle part;intracellular part;lamell…		BAE_BRCA1_TARGETS_DN;BENPORATH_MYC_MAX_TARGETS;BIOPOLYMER_METABOLIC_PROCESS;BIOPOLYMER_MODIFICATION;CAGGTG_V$E12_Q6;CAIRO_LIVER_DEVELOPMENT_DN;CELLULAR_MACROMOLECULE_METABOLIC_PROCESS;CELLULAR_PROTEIN_METABOLIC_PROCESS;CHARAFE_BREAST_CANCER_LUMINAL_VS_BASAL_DN;chr1p22;CTTTGT_V$LEF1_Q2;DACOSTA_UV_RESPONSE_VIA_ERCC3_COMMON_DN;DACOSTA_UV_RESPONSE_VIA_ERCC3_DN;DANG_BOUND_BY_MYC;DE_YY1_TARGETS_DN;FLEC…	---	3D-structure;Acetylation;Alternativesplicing;Apoptosis;ATP-binding;Celladhesion;Cellcycle;Celldivision;Celljunction;Cellprojection;Completeproteome;Cytoplasm;Cytoskeleton;Kinase;Membrane;Nucleotide-binding;Nucleus;Phosphoprotein;Polymorphism;Referenceproteome;Repeat;Serine/threonine-proteinkinase;Transcription;Transcriptionregulation;Transferase			+	Control vs CFT		Serine/threonine-protein kinase N2	PKN2	Q16513	Q16513	PKN2_HUMAN	9	254150000	35	0.0815185	0.190877	1.29284
25.8332	26.873	27.0754	25.9191	26.432	26.6389	26.4177	27.7557	25.7703	24.118	25.4183	24.5565	26.4673	26.3601	25.7969	25.2987	20.1431	26.7613	25.1085	24.0951	25.7316	24.9752	26.5322	25.652	26.0827	25.2236	24.4008	biological regulation;cation homeostasis;cellular cation homeostasis;cellular chemical homeostasis;cellular homeostasis;cellular ion homeostasis;cellular iron ion homeostasis;cellular metal ion homeostasis;cellular process;chemical homeostasis;establishment of localization;homeostatic process;ion homeostasis;iron ion homeostasis;metal ion homeostasis;regulation of biological quality;response to c…	binding;catalytic activity;cation binding;ferric-chelate reductase activity;ion binding;metal ion binding;oxidoreductase activity;oxidoreductase activity, oxidizing metal ions;oxidoreductase activity, oxidizing metal ions, NAD or NADP as acceptor	brush border membrane;cell part;cell projection membrane;cell projection part;extracellular membrane-bounded organelle;extracellular organelle;extracellular region part;extracellular vesicular exosome;integral to membrane;intrinsic to membrane;membrane;membrane part;membrane-bounded organelle;membrane-bounded vesicle;organelle;plasma membrane;plasma membrane part;vesicle	Mineral absorption	AAAYRNCTG_UNKNOWN;ACEVEDO_LIVER_CANCER_UP;ACEVEDO_LIVER_TUMOR_VS_NORMAL_ADJACENT_TISSUE_UP;AMIT_SERUM_RESPONSE_60_MCF10A;ATF2_UP.V1_DN;BOQUEST_STEM_CELL_UP;CHANDRAN_METASTASIS_DN;CHANG_CORE_SERUM_RESPONSE_DN;CHARAFE_BREAST_CANCER_LUMINAL_VS_BASAL_DN;CHICAS_RB1_TARGETS_SENESCENT;chr2q31;CTIP_DN.V1_DN;DAVICIONI_TARGETS_OF_PAX_FOXO1_FUSIONS_UP;DELYS_THYROID_CANCER_DN;DOANE_BREAST_CANCER_ESR1_UP;DOAN…	---	Alternativesplicing;Completeproteome;Electrontransport;Glycoprotein;Heme;Iron;Membrane;Metal-binding;Oxidoreductase;Phosphoprotein;Polymorphism;Referenceproteome;Transmembrane;Transmembranehelix;Transport			+	Control vs CFT		Cytochrome b reductase 1	CYBRD1	Q53TN4	Q53TN4	CYBR1_HUMAN	5	2517900000	139	0.0225425	0.0807333	1.62695
22.938	23.7471	22.653	23.2286	23.6105	23.4214	22.1981	22.9557	22.0102	18.6066	19.9321	22.6676	22.6503	22.6736	23.3476	19.7397	20.7298	23.8937	23.773	18.6345	20.1984	20.2104	20.2749	19.4426	23.1523	23.4851	20.1331	biological regulation;cellular process;cellular response to stimulus;establishment of localization;establishment of localization in cell;establishment of protein localization;intracellular protein transport;intracellular transport;negative regulation of biological process;negative regulation of cell cycle;negative regulation of cell cycle process;negative regulation of cellular component organiza…	binding;clathrin binding;enzyme binding;kinase binding;protein binding;protein kinase binding	cell part;extracellular membrane-bounded organelle;extracellular organelle;extracellular region part;extracellular vesicular exosome;intracellular;membrane-bounded organelle;membrane-bounded vesicle;organelle;vesicle		AACTTT_UNKNOWN;BAELDE_DIABETIC_NEPHROPATHY_DN;CACGTG_V$MYC_Q2;chr17p11;CYTAGCAAY_UNKNOWN;DUTERTRE_ESTRADIOL_RESPONSE_24HR_DN;FORTSCHEGGER_PHF8_TARGETS_DN;GOZGIT_ESR1_TARGETS_DN;GSE10239_NAIVE_VS_KLRG1HIGH_EFF_CD8_TCELL_UP;GSE11057_NAIVE_VS_CENT_MEMORY_CD4_TCELL_UP;GSE11057_NAIVE_VS_EFF_MEMORY_CD4_TCELL_UP;GSE11057_NAIVE_VS_MEMORY_CD4_TCELL_UP;GSE12366_PLASMA_CELL_VS_NAIVE_BCELL_UP;GSE14308_TH17_V…	---	Acetylation;Alternativesplicing;Completeproteome;Phosphoprotein;Proteintransport;Referenceproteome;Transport			+	Control vs CFT		TOM1-like protein 2	TOM1L2	Q6ZVM7	Q6ZVM7	TM1L2_HUMAN	5	266020000	34	0.0430375	0.121494	1.53916
23.9252	22.0908	22.4868	23.5193	22.9808	24.1565	23.9129	22.5378	22.4996	22.926	19.2556	21.843	19.7292	22.2103	23.2999	22.8922	20.6207	22.4854	19.886	23.0536	22.2466	18.5725	22.2346	22.4084	19.5546	19.3931	20.7242	biological regulation;macromolecule metabolic process;metabolic process;negative regulation of biological process;negative regulation of BMP signaling pathway;negative regulation of cell communication;negative regulation of cellular process;negative regulation of defense response;negative regulation of defense response to virus;negative regulation of immune effector process;negative regulation of…	catalytic activity;endopeptidase activity;hydrolase activity;peptidase activity;peptidase activity, acting on L-amino acid peptides;serine hydrolase activity;serine-type endopeptidase activity;serine-type peptidase activity	cell part;cytoplasmic part;cytosol;extracellular matrix;extracellular membrane-bounded organelle;extracellular organelle;extracellular region part;extracellular space;extracellular vesicular exosome;intracellular part;membrane-bounded organelle;membrane-bounded vesicle;organelle;vesicle		AKT_UP.V1_DN;ATGTTTC,MIR-494;BACOLOD_RESISTANCE_TO_ALKYLATING_AGENTS_UP;BAELDE_DIABETIC_NEPHROPATHY_DN;BASAKI_YBX1_TARGETS_DN;BENPORATH_EED_TARGETS;BENPORATH_SUZ12_TARGETS;BERENJENO_TRANSFORMED_BY_RHOA_UP;BOQUEST_STEM_CELL_UP;BYSTRYKH_HEMATOPOIESIS_STEM_CELL_QTL_TRANS;CAIRO_HEPATOBLASTOMA_CLASSES_DN;CASTELLANO_NRAS_TARGETS_DN;CERVERA_SDHB_TARGETS_1_UP;CHARAFE_BREAST_CANCER_LUMINAL_VS_BASAL_DN;CHA…	---	3D-structure;Age-relatedmaculardegeneration;Completeproteome;Cytoplasm;Directproteinsequencing;Diseasemutation;Growthfactorbinding;Hydrolase;Protease;Referenceproteome;Secreted;Serineprotease;Signal			+	Control vs CFT		Serine protease HTRA1	HTRA1	Q92743	Q92743	HTRA1_HUMAN	4	268600000	43	0.0173722	0.0705263	1.47614
23.3003	22.253	24.4706	23.3886	24.3485	23.0376	22.6607	22.9947	18.2279	23.0669	21.0246	22.39	23.2094	23.2506	23.2385	17.5089	22.5416	22.6918	23.0262	19.0883	18.7936	18.859	20.1379	22.5059	22.57	19.541	19.2632	antigen processing and presentation;antigen processing and presentation of exogenous antigen;antigen processing and presentation of exogenous peptide antigen;antigen processing and presentation of exogenous peptide antigen via MHC class II;antigen processing and presentation of peptide antigen;antigen processing and presentation of peptide antigen via MHC class II;antigen processing and presentat…	binding;cytoskeletal protein binding;kinesin binding;protein binding	axoneme;axoneme part;cell part;cell projection;cell projection part;centrosome;chromosome;cilium;condensed chromosome;condensed nuclear chromosome;cytoplasmic part;cytoskeletal part;cytoskeleton;cytosol;endoplasmic reticulum;extracellular membrane-bounded organelle;extracellular organelle;extracellular region part;extracellular vesicular exosome;Golgi apparatus;intracellular membrane-bounded orga…		AACTTT_UNKNOWN;ACEVEDO_LIVER_CANCER_UP;ACEVEDO_LIVER_TUMOR_VS_NORMAL_ADJACENT_TISSUE_UP;BERENJENO_TRANSFORMED_BY_RHOA_DN;BLALOCK_ALZHEIMERS_DISEASE_DN;BORCZUK_MALIGNANT_MESOTHELIOMA_UP;BOYLAN_MULTIPLE_MYELOMA_D_CLUSTER_UP;BRUINS_UVC_RESPONSE_LATE;BURTON_ADIPOGENESIS_9;CAIRO_LIVER_DEVELOPMENT_UP;CASORELLI_ACUTE_PROMYELOCYTIC_LEUKEMIA_DN;CELLULAR_COMPONENT_ASSEMBLY;chr1p36;CROMER_METASTASIS_UP;CYTO…	---	Alternativesplicing;Completeproteome;Phosphoprotein;Polymorphism;Referenceproteome;Repeat			+	Control vs CFT		Kinesin-associated protein 3	KIFAP3	Q92845	Q92845	KIFA3_HUMAN	6	253570000	49	0.0448195	0.121159	1.70136
23.6256	23.8841	23.1034	24.5204	24.132	24.533	24.1561	23.4646	23.0876	25.2754	20.1112	21.9147	20.5537	21.964	23.6927	18.36	23.0213	22.8543	19.6535	24.7426	22.9043	19.1911	22.3697	23.8493	23.1576	22.4703	19.5154	amine metabolic process;aminoglycan biosynthetic process;aminoglycan metabolic process;anatomical structure development;anatomical structure formation involved in morphogenesis;angiogenesis;biosynthetic process;blood vessel development;carbohydrate biosynthetic process;carbohydrate metabolic process;cell development;cellular developmental process;cellular macromolecule metabolic process;cellular …	catalytic activity;heparan sulfate 6-O-sulfotransferase activity;heparan sulfate sulfotransferase activity;sulfotransferase activity;transferase activity;transferase activity, transferring sulfur-containing groups	cell part;cytoplasmic part;extracellular membrane-bounded organelle;extracellular organelle;extracellular region part;extracellular vesicular exosome;Golgi apparatus part;Golgi membrane;integral to membrane;integral to plasma membrane;intracellular organelle part;intracellular part;intrinsic to membrane;intrinsic to plasma membrane;membrane;membrane part;membrane-bounded organelle;membrane-bounde…	Glycosaminoglycan biosynthesis - heparan sulfate	AATGTGA,MIR-23A,MIR-23B;ACAGGGT,MIR-10A,MIR-10B;ACEVEDO_METHYLATED_IN_LIVER_CANCER_DN;BENPORATH_EED_TARGETS;BENPORATH_ES_WITH_H3K27ME3;BENPORATH_PRC2_TARGETS;BENPORATH_SUZ12_TARGETS;BILANGES_SERUM_SENSITIVE_GENES;BILD_MYC_ONCOGENIC_SIGNATURE;BIOSYNTHETIC_PROCESS;BMI1_DN.V1_DN;CAGGTG_V$E12_Q6;CARBOHYDRATE_BIOSYNTHETIC_PROCESS;CARBOHYDRATE_METABOLIC_PROCESS;CELLULAR_BIOSYNTHETIC_PROCESS;CELLULAR_CA…	---	Alternativesplicing;Coiledcoil;Completeproteome;Diseasemutation;Glycoprotein;Hypogonadotropichypogonadism;Kallmannsyndrome;Membrane;Polymorphism;Referenceproteome;Signal-anchor;Transferase;Transmembrane;Transmembranehelix			+	Control vs CFT		Heparan-sulfate 6-O-sulfotransferase 2	HS6ST2	Q96MM7;O60243;Q8IZP7	Q96MM7	H6ST2_HUMAN	8	506190000	72	0.027722	0.0858351	1.82482
21.9213	21.8984	21.9004	21.8653	21.9303	21.8305	21.4602	21.4272	18.6639	23.5776	19.6604	22.0231	20.1475	21.8671	21.9001	21.9781	20.5292	21.1828	20.2663	18.1848	18.5032	22.3545	18.4266	21.2485	18.1775	19.3694	22.2675	activation of immune response;activation of innate immune response;anaphase-promoting complex-dependent proteasomal ubiquitin-dependent protein catabolic process;antigen processing and presentation;antigen processing and presentation of exogenous antigen;antigen processing and presentation of exogenous peptide antigen;antigen processing and presentation of exogenous peptide antigen via MHC class …	enzyme regulator activity	cell part;cytoplasmic part;cytosol;extracellular membrane-bounded organelle;extracellular organelle;extracellular region part;extracellular vesicular exosome;intracellular organelle part;intracellular part;macromolecular complex;membrane;membrane-bounded organelle;membrane-bounded vesicle;nuclear part;nucleoplasm;organelle;organelle part;proteasome accessory complex;proteasome complex;proteasome …	Proteasome	BASSO_B_LYMPHOCYTE_NETWORK;BLALOCK_ALZHEIMERS_DISEASE_DN;BYSTRYKH_HEMATOPOIESIS_STEM_CELL_QTL_TRANS;CAFFAREL_RESPONSE_TO_THC_8HR_3_DN;CHARAFE_BREAST_CANCER_LUMINAL_VS_MESENCHYMAL_DN;CHAUHAN_RESPONSE_TO_METHOXYESTRADIOL_UP;chr2q37;CONCANNON_APOPTOSIS_BY_EPOXOMICIN_UP;DAIRKEE_CANCER_PRONE_RESPONSE_BPA;DIAZ_CHRONIC_MEYLOGENOUS_LEUKEMIA_UP;GARY_CD5_TARGETS_DN;GGGCGGR_V$SP1_Q6;GGGYGTGNY_UNKNOWN;GSE118…	KEGG_PROTEASOME_No	Acetylation;Alternativesplicing;Completeproteome;Phosphoprotein;Proteasome;Referenceproteome;Repeat			+	Control vs CFT		26S proteasome non-ATPase regulatory subunit 1	PSMD1	Q99460	Q99460	PSMD1_HUMAN	2	124870000	11	0.106572	0.242127	0.947462
23.2568	23.2304	23.5733	22.8499	23.137	22.7135	23.2929	22.8953	22.7783	22.9284	22.483	22.8041	22.5981	24.0546	18.834	22.5296	22.4973	22.5008	23.4129	22.0154	20.6991	18.7457	22.6404	22.6739	22.8119	22.8047	19.7328	biological regulation;biosynthetic process;cellular biosynthetic process;cellular lipid metabolic process;cellular metabolic process;cellular process;cellular response to calcium ion;cellular response to chemical stimulus;cellular response to inorganic substance;cellular response to metal ion;cellular response to stimulus;establishment of localization;glycerolipid biosynthetic process;glycerolipi…	binding;calcium ion binding;calcium-dependent phospholipid binding;catalytic activity;cation binding;endopeptidase activity;hydrolase activity;identical protein binding;ion binding;lipid binding;metal ion binding;NF-kappaB binding;peptidase activity;peptidase activity, acting on L-amino acid peptides;phosphatidylserine binding;phospholipid binding;protein binding;protein dimerization activity;pro…	cell part;cytoplasm;cytoplasmic part;cytosol;extracellular membrane-bounded organelle;extracellular organelle;extracellular region part;extracellular vesicular exosome;intracellular membrane-bounded organelle;intracellular organelle;intracellular part;membrane;membrane-bounded organelle;membrane-bounded vesicle;nucleus;organelle;plasma membrane;vesicle		AAAYWAACM_V$HFH4_01;CAGGTG_V$E12_Q6;CAIRO_HEPATOBLASTOMA_CLASSES_UP;CCAWYNNGAAR_UNKNOWN;chr20q11;CREIGHTON_ENDOCRINE_THERAPY_RESISTANCE_1;CTTTAAR_UNKNOWN;CTTTGA_V$LEF1_Q2;CTTTGT_V$LEF1_Q2;ENK_UV_RESPONSE_EPIDERMIS_UP;ESTABLISHMENT_OF_LOCALIZATION;FIRESTEIN_PROLIFERATION;FLECHNER_PBL_KIDNEY_TRANSPLANT_OK_VS_DONOR_UP;GARY_CD5_TARGETS_UP;GATTGGY_V$NFY_Q6_01;GCANCTGNY_V$MYOD_Q6;GCCATNTTG_V$YY1_Q6;GGA…	---	Acetylation;Completeproteome;Phosphoprotein;Polymorphism;Referenceproteome;Repeat			+	Control vs CFT		Copine-1	CPNE1	Q99829	Q99829	CPNE1_HUMAN	5	329920000	49	0.159983	0.349988	0.665596
22.9387	22.0286	22.2058	21.7034	23.4551	22.2943	22.9414	21.7624	20.1277	22.3383	20.9741	21.4244	23.3187	18.4896	21.95	19.2498	19.2372	21.9551	22.6646	20.3812	19.2646	19.6595	19.6939	21.1827	19.7896	20.7455	19.0057	biological regulation;cellular process;cellular response to abiotic stimulus;cellular response to acidity;cellular response to pH;cellular response to stimulus;establishment of localization;establishment of localization in cell;exocytosis;hormone secretion;hormone transport;insulin secretion;insulin secretion involved in cellular response to glucose stimulus;negative regulation of adiponectin sec…	binding;cytoskeletal protein binding;enzyme binding;gamma-tubulin binding;GTPase binding;protein binding;Rab GTPase binding;Ras GTPase binding;small GTPase binding;tubulin binding	cell part;cytoplasmic membrane-bounded vesicle;cytoplasmic part;cytoplasmic vesicle;cytoplasmic vesicle membrane;cytoplasmic vesicle part;cytoskeletal part;early endosome;early endosome membrane;endosomal part;endosome;endosome membrane;Golgi apparatus;Golgi apparatus part;Golgi membrane;intracellular membrane-bounded organelle;intracellular organelle;intracellular organelle part;intracellular pa…	Endocytosis	AACTTT_UNKNOWN;ACTTTAT,MIR-142-5P;BURTON_ADIPOGENESIS_PEAK_AT_0HR;CHEBOTAEV_GR_TARGETS_UP;CHEN_METABOLIC_SYNDROM_NETWORK;CHIARADONNA_NEOPLASTIC_TRANSFORMATION_KRAS_DN;chr2p13;CHYLA_CBFA2T3_TARGETS_UP;CYTOPLASM;CYTOPLASMIC_PART;CYTOSKELETAL_PROTEIN_BINDING;E2F1_UP.V1_DN;ENVELOPE;ESC_J1_UP_LATE.V1_UP;GGGCGGR_V$SP1_Q6;GRAESSMANN_APOPTOSIS_BY_DOXORUBICIN_UP;GRAESSMANN_RESPONSE_TO_MC_AND_DOXORUBICIN_U…	---	Completeproteome;Cytoplasm;Cytoplasmicvesicle;Endosome;Golgiapparatus;Membrane;Mitochondrion;Phosphoprotein;Proteintransport;Referenceproteome;Transport			+	Control vs CFT	+	Rab11 family-interacting protein 5	RAB11FIP5	Q9BXF6	Q9BXF6	RFIP5_HUMAN	3	118070000	20	0.0243663	0.0879608	1.40699
26.1431	25.6467	26.9648	26.5659	26.0643	26.6637	26.2735	25.4825	26.4702	26.926	26.835	28.6277	27.7473	26.6462	27.1311	26.2259	27.7272	25.5077	26.5833	27.1284	27.2911	27.5677	27.6324	26.3646	27.7372	27.4804	26.9387	anion transport;cellular process;chloride transport;establishment of localization;inorganic anion transport;ion transmembrane transport;ion transport;transmembrane transport;transport	anion channel activity;anion transmembrane transporter activity;channel activity;chloride channel activity;gated channel activity;intracellular calcium activated chloride channel activity;ion channel activity;ion gated channel activity;ion transmembrane transporter activity;passive transmembrane transporter activity;substrate-specific channel activity;substrate-specific transmembrane transporter …	cell part;chloride channel complex;extracellular membrane-bounded organelle;extracellular organelle;extracellular region part;extracellular vesicular exosome;ion channel complex;macromolecular complex;membrane;membrane part;membrane-bounded organelle;membrane-bounded vesicle;organelle;plasma membrane;protein complex;vesicle		AAGCACA,MIR-218;AGGGCCA,MIR-328;BRUINS_UVC_RESPONSE_VIA_TP53_GROUP_A;CAHOY_ASTROCYTIC;CAMP_UP.V1_DN;chr7p22;CTATGCA,MIR-153;DELASERNA_MYOD_TARGETS_DN;FORTSCHEGGER_PHF8_TARGETS_DN;GGCAGCT,MIR-22;GGGACCA,MIR-133A,MIR-133B;GRADE_COLON_CANCER_UP;GSE11057_CD4_CENT_MEM_VS_PBMC_DN;GSE11057_CD4_EFF_MEM_VS_PBMC_DN;GSE11057_NAIVE_CD4_VS_PBMC_CD4_TCELL_DN;GSE11057_PBMC_VS_MEM_CD4_TCELL_UP;GSE15324_NAIVE_VS_…	---	Alternativesplicing;Calcium;Cellmembrane;Chloride;Chloridechannel;Completeproteome;Glycoprotein;Ionchannel;Iontransport;Membrane;Phosphoprotein;Referenceproteome;Transmembrane;Transmembranehelix;Transport			+	Control vs CFT		Protein tweety homolog 3	TTYH3	Q9C0H2	Q9C0H2	TTYH3_HUMAN	11	4657900000	354	0.034397	0.158757	-0.737437
25.6425	25.1793	25.9809	26.6126	26.0548	26.4809	26.3973	26.4756	22.0963	22.9712	18.4521	18.5395	24.5669	26.2616	25.0754	25.38	23.8986	26.0284	25.7141	24.8401	21.8691	21.8372	24.8411	25.0443	25.4363	26.02	25.5526	actin cytoskeleton organization;actin filament-based process;activation of protein kinase activity;anatomical structure morphogenesis;biological regulation;cell cycle arrest;cell cycle process;cell migration;cell morphogenesis;cell motility;cell surface receptor linked signaling pathway;cellular component morphogenesis;cellular component movement;cellular component organization;cellular component…	adenyl nucleotide binding;adenyl ribonucleotide binding;ATP binding;binding;catalytic activity;nucleotide binding;purine nucleotide binding;purine ribonucleoside triphosphate binding;purine ribonucleotide binding;ribonucleotide binding;transferase activity;transferase activity, transferring phosphorus-containing groups	cell part;cytoplasm;cytoplasmic part;cytosol;intracellular membrane-bounded organelle;intracellular organelle;intracellular part;membrane-bounded organelle;nucleus;organelle		AAACCAC,MIR-140;ACTIVATION_OF_PROTEIN_KINASE_ACTIVITY;BIOPOLYMER_METABOLIC_PROCESS;BIOPOLYMER_MODIFICATION;CELLULAR_LOCALIZATION;CELLULAR_MACROMOLECULE_METABOLIC_PROCESS;CELLULAR_PROTEIN_METABOLIC_PROCESS;CHARAFE_BREAST_CANCER_BASAL_VS_MESENCHYMAL_DN;CHARAFE_BREAST_CANCER_LUMINAL_VS_MESENCHYMAL_DN;chr2q33;CTGAGCC,MIR-24;CYTOPLASM;ESTABLISHMENT_OF_CELLULAR_LOCALIZATION;ESTABLISHMENT_OF_LOCALIZATIO…	---	Alternativesplicing;ATP-binding;Cellcycle;Completeproteome;Cytoplasm;Nucleotide-binding;Nucleus;Polymorphism;Referenceproteome			+	Control vs CFT		STE20-related kinase adapter protein beta	STRADB	Q9C0K7	Q9C0K7	STRAB_HUMAN	11	1961100000	218	0.0214469	0.0639747	2.45097
26.7567	27.4213	26.7561	26.6392	26.8351	26.4735	26.178	26.9096	26.0636	20.0578	25.2633	26.7479	25.821	26.6995	26.9203	19.8062	25.3485	26.1247	24.2148	25.0602	23.5132	24.5235	26.2323	25.6788	26.3454	25.2822	24.9368	autophagy;biological regulation;catabolic process;cell activation;cell communication;cell differentiation;cell-cell signaling;cellular catabolic process;cellular developmental process;cellular metabolic process;cellular process;cellular response to stimulus;defense response;developmental process;epithelial cell differentiation;immune response;immune system process;inflammatory response;innate imm…	binding;enzyme binding;kinase binding;molecular transducer activity;protein binding;receptor binding;signal transducer activity;Toll-like receptor binding	cell part;cytoplasm;cytoplasmic part;cytosol;extracellular membrane-bounded organelle;extracellular organelle;extracellular region part;extracellular vesicular exosome;interleukin-1 receptor complex;interleukin-18 receptor complex;intracellular organelle part;intracellular part;macromolecular complex;membrane part;membrane-bounded organelle;membrane-bounded vesicle;nuclear body;nuclear part;nucle…	Toll-like receptor signaling pathway	ACEVEDO_LIVER_CANCER_DN;BIOCARTA_GSK3_PATHWAY;BIOCARTA_IL1R_PATHWAY;BIOCARTA_TOLL_PATHWAY;BRUINS_UVC_RESPONSE_LATE;CAGCTG_V$AP4_Q5;CELL_CELL_SIGNALING;chr11p;CREIGHTON_AKT1_SIGNALING_VIA_MTOR_UP;DODD_NASOPHARYNGEAL_CARCINOMA_UP;ENK_UV_RESPONSE_EPIDERMIS_UP;FEVR_CTNNB1_TARGETS_UP;GCM_MAPK10;GSE10094_LCMV_VS_LISTERIA_IND_EFF_CD4_TCELL_UP;GSE13411_NAIVE_BCELL_VS_PLASMA_CELL_DN;GSE14308_TH2_VS_NATURA…	---	3D-structure;Acetylation;Alternativesplicing;Autophagy;Completeproteome;Cytoplasm;Immunity;Inflammatoryresponse;Innateimmunity;Phosphoprotein;Polymorphism;Referenceproteome;Repeat			+	Control vs CFT		Toll-interacting protein	TOLLIP	Q9H0E2	Q9H0E2	TOLIP_HUMAN	4	2975100000	140	0.0424075	0.112086	1.90221
23.0129	19.4924	18.5274	19.298	19.105	19.6716	19.9678	19.3311	19.1317	19.3944	20.6999	18.7233	17.9698	23.5651	23.6634	23.701	24.1801	23.0863	23.3296	22.997	23.4209	24.3064	23.7653	23.9129	22.8209	23.3266	18.8444	anatomical structure development;biological regulation;cellular process;cellular response to stimulus;developmental process;establishment of localization;establishment of localization in cell;intracellular signal transduction;intracellular transport;nervous system development;regulation of biological process;regulation of cellular process;response to stimulus;signal transduction;system developmen…	binding;identical protein binding;protein binding;protein C-terminus binding;protein dimerization activity;protein heterodimerization activity;protein homodimerization activity	cell part;cytoplasm;extracellular membrane-bounded organelle;extracellular organelle;extracellular region part;extracellular vesicular exosome;intracellular part;membrane;membrane-bounded organelle;membrane-bounded vesicle;organelle;plasma membrane;vesicle		ACEVEDO_FGFR1_TARGETS_IN_PROSTATE_CANCER_MODEL_UP;BRUINS_UVC_RESPONSE_LATE;BRUINS_UVC_RESPONSE_VIA_TP53_GROUP_B;CHEN_METABOLIC_SYNDROM_NETWORK;chr20p13;CREIGHTON_ENDOCRINE_THERAPY_RESISTANCE_3;CYTAGCAAY_UNKNOWN;CYTOPLASM;DODD_NASOPHARYNGEAL_CARCINOMA_UP;FEVR_CTNNB1_TARGETS_UP;FRASOR_RESPONSE_TO_SERM_OR_FULVESTRANT_DN;GSE10239_NAIVE_VS_DAY4.5_EFF_CD8_TCELL_DN;GSE10239_NAIVE_VS_KLRG1HIGH_EFF_CD8_TC…	---	Alternativesplicing;Completeproteome;Polymorphism;Referenceproteome;Repeat			+	Control vs CFT		Syntenin-2	SDCBP2	Q9H190	Q9H190	SDCB2_HUMAN	3	318130000	50	0.0523446	0.127923	-1.90268
22.6245	23.9096	23.1509	23.1027	23.198	22.589	22.3489	22.7085	20.8876	22.7597	18.1769	23.0909	23.3909	22.7964	23.2617	22.6619	19.4983	22.7497	19.7057	19.5491	19.4208	20.3817	22.8972	22.9403	23.0115	19.9732	18.8443	anatomical structure development;biological regulation;brain development;cellular component organization;cellular component organization at cellular level;cellular component organization or biogenesis;cellular component organization or biogenesis at cellular level;cellular process;cellular response to stimulus;developmental process;endoplasmic reticulum organization;endoplasmic reticulum tubular …	binding;catalytic activity;GDP binding;GTP binding;GTPase activity;guanyl nucleotide binding;guanyl ribonucleotide binding;hydrolase activity;hydrolase activity, acting on acid anhydrides;hydrolase activity, acting on acid anhydrides, in phosphorus-containing anhydrides;nucleoside-triphosphatase activity;nucleotide binding;purine nucleotide binding;purine ribonucleoside triphosphate binding;purin…	cell part;cytoplasmic part;endoplasmic reticulum part;endoplasmic reticulum tubular network;extracellular membrane-bounded organelle;extracellular organelle;extracellular region part;extracellular vesicular exosome;Golgi apparatus;intracellular;intracellular membrane-bounded organelle;intracellular organelle;intracellular organelle part;intracellular part;membrane;membrane-bounded organelle;membr…		ACEVEDO_LIVER_CANCER_UP;BHAT_ESR1_TARGETS_VIA_AKT1_DN;BRUINS_UVC_RESPONSE_VIA_TP53_GROUP_A;CAGCTTT,MIR-320;chr10p12;GOLDRATH_HOMEOSTATIC_PROLIFERATION;GOTZMANN_EPITHELIAL_TO_MESENCHYMAL_TRANSITION_DN;GRAESSMANN_APOPTOSIS_BY_DOXORUBICIN_DN;GSE13738_TCR_VS_BYSTANDER_ACTIVATED_CD4_TCELL_DN;GSE17721_0.5H_VS_24H_GARDIQUIMOD_BMDM_DN;GSE17721_0.5H_VS_8H_GARDIQUIMOD_BMDM_DN;GSE17721_PAM3CSK4_VS_GADIQUIMO…	---	3D-structure;Acetylation;Alternativesplicing;Cellmembrane;Completeproteome;Developmentalprotein;Directproteinsequencing;GTP-binding;Lipoprotein;Membrane;Methylation;Nucleotide-binding;Palmitate;Polymorphism;Prenylation;Proteintransport;Referenceproteome;Transport			+	Control vs CFT		Ras-related protein Rab-18	RAB18	Q9NP72	Q9NP72	RAB18_HUMAN	4	215060000	27	0.0516044	0.141956	1.40995
25.8977	18.2206	19.1333	20.318	20.6794	24.5336	18.7985	19.9001	18.0003	19.6725	19.5172	26.807	25.6972	25.4333	26.5723	25.0816	25.4366	25.4223	19.855	25.5409	25.1133	25.9014	26.9643	24.9396	27.6652	24.9647	25.6943	biological regulation;cellular component organization;cellular component organization or biogenesis;cellular macromolecule metabolic process;cellular membrane organization;cellular metabolic process;cellular process;cobalamin metabolic process;cofactor metabolic process;endocytosis;establishment of localization;heterocycle metabolic process;insulin receptor internalization;macromolecule metabolic…	binding;cobalamin binding;tetrapyrrole binding;vitamin binding	cell part;clathrin-coated endocytic vesicle;clathrin-coated vesicle;coated vesicle;cytoplasmic membrane-bounded vesicle;cytoplasmic part;cytoplasmic vesicle;endocytic vesicle;integral to membrane;intracellular membrane-bounded organelle;intracellular organelle;intracellular organelle part;intracellular part;intrinsic to membrane;lysosomal membrane;membrane;membrane part;membrane-bounded organelle…	Vitamin digestion and absorption	BHAT_ESR1_TARGETS_VIA_AKT1_DN;BRUINS_UVC_RESPONSE_EARLY_LATE;chr6q13;CREIGHTON_ENDOCRINE_THERAPY_RESISTANCE_3;CUI_TCF21_TARGETS_2_DN;DUTERTRE_ESTRADIOL_RESPONSE_24HR_DN;ESC_J1_UP_EARLY.V1_UP;ESC_J1_UP_LATE.V1_UP;ESC_V6.5_UP_LATE.V1_UP;GOBERT_OLIGODENDROCYTE_DIFFERENTIATION_DN;GRAESSMANN_APOPTOSIS_BY_DOXORUBICIN_DN;GSE11864_CSF1_VS_CSF1_IFNG_IN_MAC_UP;GSE13306_LAMINA_PROPRIA_VS_SPLEEN_TREG_UP;GSE1…	---	Alternativesplicing;Cobalamin;Cobalt;Completeproteome;Glycoprotein;Host-virusinteraction;Lysosome;Membrane;Phosphoprotein;Polymorphism;Referenceproteome;Transmembrane;Transmembranehelix;Transport			+	Control vs CFT		Probable lysosomal cobalamin transporter	LMBRD1	Q9NUN5	Q9NUN5	LMBD1_HUMAN	3	1877600000	78	0.0759697	0.15626	-2.6512
24.6869	23.8704	24.5896	25.2059	25.3201	24.8644	24.3093	25.3629	23.301	23.5954	23.8091	23.6809	25.1538	25.6034	24.4239	24.1203	23.7714	24.4548	24.1681	22.4075	24.0423	22.9401	23.9223	23.7576	24.4553	24.4039	23.1253			cell part;cell projection;cilium;extracellular membrane-bounded organelle;extracellular organelle;extracellular region part;extracellular vesicular exosome;intracellular;membrane-bounded organelle;membrane-bounded vesicle;organelle;vesicle		AAAYRNCTG_UNKNOWN;AAAYWAACM_V$HFH4_01;AACTTT_UNKNOWN;ACTGAAA,MIR-30A-3P,MIR-30E-3P;ACTGCCT,MIR-34B;AGUIRRE_PANCREATIC_CANCER_COPY_NUMBER_UP;ATGTTAA,MIR-302C;BENPORATH_PROLIFERATION;BONOME_OVARIAN_CANCER_SURVIVAL_SUBOPTIMAL_DEBULKING;BROWNE_HCMV_INFECTION_16HR_UP;BROWNE_HCMV_INFECTION_20HR_UP;BRUINS_UVC_RESPONSE_LATE;BURTON_ADIPOGENESIS_6;CAGCTTT,MIR-320;CAGGTA_V$AREB6_01;CAGGTG_V$E12_Q6;CATTGTYY_…	---	Alternativesplicing;Completeproteome;Polymorphism;Referenceproteome			+	Control vs CFT		Protein FAM49B	FAM49B	Q9NUQ9;Q9H0Q0	Q9NUQ9	FA49B_HUMAN	12	967460000	148	0.0406443	0.173884	0.735387
30.3472	30.1152	29.173	29.1812	28.8179	29.7088	30.8755	30.5503	28.9017	28.2952	25.9126	28.7613	29.4728	30.9148	29.9743	29.487	29.9302	29.2641	29.6372	28.3933	26.3921	26.4976	29.2469	28.5451	29.6247	27.8831	28.8864	amine transport;ammonium transmembrane transport;ammonium transport;biological regulation;cation homeostasis;cation transport;cell differentiation;cellular chemical homeostasis;cellular developmental process;cellular homeostasis;cellular ion homeostasis;cellular process;chemical homeostasis;developmental process;epithelial cell differentiation;establishment of localization;homeostatic process;ion…	ammonium transmembrane transporter activity;ankyrin binding;binding;cation transmembrane transporter activity;cytoskeletal protein binding;inorganic cation transmembrane transporter activity;ion transmembrane transporter activity;organic cation transmembrane transporter activity;protein binding;substrate-specific transmembrane transporter activity;substrate-specific transporter activity;transmemb…	apical plasma membrane;basolateral plasma membrane;cell part;cytoplasmic part;cytoplasmic vesicle;extracellular membrane-bounded organelle;extracellular organelle;extracellular region part;extracellular vesicular exosome;integral to membrane;integral to plasma membrane;intracellular organelle;intracellular part;intrinsic to membrane;intrinsic to plasma membrane;membrane;membrane part;membrane-bou…		AATGGAG,MIR-136;APICAL_PART_OF_CELL;APICAL_PLASMA_MEMBRANE;BOSCO_EPITHELIAL_DIFFERENTIATION_MODULE;CATION_TRANSMEMBRANE_TRANSPORTER_ACTIVITY;CATION_TRANSPORT;CCAGGGG,MIR-331;CELLULAR_HOMEOSTASIS;CHEMICAL_HOMEOSTASIS;chr15q25;CYTOSKELETAL_PROTEIN_BINDING;DODD_NASOPHARYNGEAL_CARCINOMA_UP;ENK_UV_RESPONSE_EPIDERMIS_UP;ESTABLISHMENT_OF_LOCALIZATION;GGGCGGR_V$SP1_Q6;GNF2_SPRR1B;GSE10239_MEMORY_VS_DAY4.…	---	3D-structure;Ammoniatransport;Cellmembrane;Completeproteome;Glycoprotein;Membrane;Polymorphism;Referenceproteome;Transmembrane;Transmembranehelix;Transport			+	Control vs CFT		Ammonium transporter Rh type C	RHCG	Q9UBD6	Q9UBD6	RHCG_HUMAN	5	30734000000	716	0.133942	0.301066	0.76743
22.5152	21.3675	22.1797	22.8231	22.5516	23.1598	21.3856	22.1643	21.7771	24.3091	18.711	23.1038	19.6889	21.6207	22.3474	19.2415	19.4172	19.837	20.1453	20.0128	19.3044	21.7272	17.9681	18.7162	18.1281	19.1114	19.2794	alcohol catabolic process;alcohol metabolic process;carbohydrate catabolic process;carbohydrate metabolic process;catabolic process;cellular carbohydrate catabolic process;cellular carbohydrate metabolic process;cellular metabolic process;cellular process;inositol catabolic process;inositol metabolic process;metabolic process;polyol catabolic process;polyol metabolic process;primary metabolic pro…	aldo-keto reductase (NADP) activity;binding;catalytic activity;cation binding;coenzyme binding;cofactor binding;ferric iron binding;inositol oxygenase activity;ion binding;iron ion binding;metal ion binding;NADP binding;nucleotide binding;oxidoreductase activity;oxidoreductase activity, acting on CH-OH group of donors;oxidoreductase activity, acting on NADH or NADPH;oxidoreductase activity, actin…	cell part;cytoplasm;extracellular membrane-bounded organelle;extracellular organelle;extracellular region part;extracellular vesicular exosome;inclusion body;intracellular part;membrane-bounded organelle;membrane-bounded vesicle;organelle;vesicle	Ascorbate and aldarate metabolism;Inositol phosphate metabolism	ALCOHOL_METABOLIC_PROCESS;ALDO_KETO_REDUCTASE_ACTIVITY;CARBOHYDRATE_CATABOLIC_PROCESS;CARBOHYDRATE_METABOLIC_PROCESS;CATABOLIC_PROCESS;CELLULAR_CARBOHYDRATE_CATABOLIC_PROCESS;CELLULAR_CARBOHYDRATE_METABOLIC_PROCESS;CELLULAR_CATABOLIC_PROCESS;CELLULAR_MACROMOLECULE_CATABOLIC_PROCESS;chr22q;CYTOPLASM;EIF4E_DN;GSE13493_DP_VS_CD8POS_THYMOCYTE_DN;GSE17721_4H_VS_24H_POLYIC_BMDM_UP;GSE17721_CTRL_VS_POLY…	---	3D-structure;Alternativesplicing;Completeproteome;Cytoplasm;Iron;Metal-binding;Oxidoreductase;Referenceproteome			+	Control vs CFT	+	Inositol oxygenase	MIOX	Q9UGB7	Q9UGB7	MIOX_HUMAN	5	205530000	27	0.0424181	0.123858	1.41737
24.0353	24.1872	23.1829	23.684	23.3433	24.098	24.5956	24.462	22.7744	20.2106	23.1532	22.8713	23.3008	23.6958	23.1607	22.7427	23.6015	23.3433	23.721	21.9266	19.1806	18.6656	23.4816	23.0996	23.6525	23.2458	21.1991	ATP biosynthetic process;ATP metabolic process;ATP synthesis coupled proton transport;biosynthetic process;cation transport;cellular biosynthetic process;cellular metabolic process;cellular nitrogen compound biosynthetic process;cellular nitrogen compound metabolic process;cellular process;energy coupled proton transport, down electrochemical gradient;establishment of localization;heterocycle bio…	enzyme activator activity;enzyme regulator activity;GTPase activator activity;GTPase regulator activity;nucleoside-triphosphatase regulator activity;transporter activity				---	Alternativesplicing;Coiledcoil;Completeproteome;GTPaseactivation;Referenceproteome			+	Control vs CFT		VPS9 domain-containing protein 1	VPS9D1	Q9Y2B5	Q9Y2B5	VP9D1_HUMAN	8	432700000	78	0.0107363	0.0682424	1.07338
27.748	27.3674	28.0615	27.9315	28.1915	27.8327	27.4084	28.1931	26.2022	26.2355	25.5108	26.3489	27.9995	27.9159	27.3135	27.4853	26.8328	27.6955	27.229	24.9831	25.6396	24.9896	27.4067	27.0621	26.7801	27.3489	27.2781	activation of protein kinase activity;biological regulation;cell cycle arrest;cell cycle process;cell surface receptor linked signaling pathway;cellular component assembly;cellular component organization;cellular component organization or biogenesis;cellular hypotonic response;cellular process;cellular response to abiotic stimulus;cellular response to chemical stimulus;cellular response to endoge…	binding;catalytic activity;enzyme activator activity;enzyme binding;enzyme regulator activity;kinase activator activity;kinase activity;kinase binding;kinase regulator activity;phosphotransferase activity, alcohol group as acceptor;protein binding;protein kinase activator activity;protein kinase activity;protein kinase regulator activity;protein serine/threonine kinase activator activity;protein …	cell part;cytoplasmic part;cytosol;extracellular membrane-bounded organelle;extracellular organelle;extracellular region part;extracellular vesicular exosome;intracellular part;membrane-bounded organelle;membrane-bounded vesicle;organelle;vesicle	mTOR signaling pathway	AACGGTT,MIR-451;AATGTGA,MIR-23A,MIR-23B;ABDELMOHSEN_ELAVL4_TARGETS;ACTGTGA,MIR-27A,MIR-27B;AGCATTA,MIR-155;ATGCTGC,MIR-103,MIR-107;BLALOCK_ALZHEIMERS_DISEASE_DN;BMI1_DN.V1_DN;BRUINS_UVC_RESPONSE_LATE;CAGCTTT,MIR-320;CAGTATT,MIR-200B,MIR-200C,MIR-429;CATTTCA,MIR-203;CCGNMNNTNACG_UNKNOWN;CHEN_HOXA5_TARGETS_9HR_UP;CHIANG_LIVER_CANCER_SUBCLASS_UNANNOTATED_DN;chr2q37;COLDREN_GEFITINIB_RESISTANCE_DN;CR…	---	3D-structure;Completeproteome;Cytoplasm;Referenceproteome			+	Control vs CFT		Calcium-binding protein 39	CAB39	Q9Y376	Q9Y376	CAB39_HUMAN	16	6718000000	491	0.00979121	0.0674878	1.0291
22.6454	22.8047	23.7607	23.5095	23.4044	24.0464	23.2799	23.8132	18.8786	22.8838	18.4214	22.6238	20.3541	23.7067	23.3049	23.2523	20.6144	23.4394	23.2539	19.047	18.384	19.4611	23.3013	21.8498	20.0848	20.2478	23.2869	anatomical structure morphogenesis;biological regulation;cell part morphogenesis;cell projection morphogenesis;cell projection organization;cellular component morphogenesis;cellular component organization;cellular component organization at cellular level;cellular component organization or biogenesis;cellular component organization or biogenesis at cellular level;cellular developmental process;cel…		cell part;cell projection;centriole;cilium;cytoplasmic part;cytoskeletal part;extracellular membrane-bounded organelle;extracellular organelle;extracellular region part;extracellular vesicular exosome;intracellular membrane-bounded organelle;intracellular non-membrane-bounded organelle;intracellular organelle;intracellular organelle part;intracellular part;macromolecular complex;membrane-bounded …			---	Cellprojection;Cilium;Completeproteome;Cytoplasm;Cytoskeleton;Microtubule;Nucleus;Referenceproteome			+	Control vs CFT		Cilia- and flagella-associated protein 20	CFAP20	Q9Y6A4	Q9Y6A4		4	312230000	29	0.0283556	0.088201	1.75967
19.4582	23.7424	25.7314	24.5753	25.5757	24.4057	24.5478	27.4509	27.471	26.1246	28.5672	26.7615	28.2659	24.9214	25.7286	26.8673	28.5751	28.2003	25.9502	26.8802	24.2654	25.1941	27.9125	25.2635	25.1304	28.4772	28.0229	cell killing;defense response;defense response to bacterium;defense response to fungus;killing of cells of other organism;multi-organism process;response to bacterium;response to biotic stimulus;response to fungus;response to other organism;response to stimulus;response to stress	catalytic activity;hydrolase activity;peptidase activity	extracellular membrane-bounded organelle;extracellular organelle;extracellular region;extracellular region part;extracellular vesicular exosome;membrane-bounded organelle;membrane-bounded vesicle;organelle;vesicle		CAGGTG_V$E12_Q6;chr12q13;EXTRACELLULAR_REGION;GSE29617_DAY3_VS_DAY7_TIV_FLU_VACCINE_PBMC_2008_UP;GSE37416_CTRL_VS_0H_F_TULARENSIS_LVS_NEUTROPHIL_DN	---	3D-structure;Acetylation;Alternativesplicing;Antibiotic;Antimicrobial;Completeproteome;Directproteinsequencing;Fungicide;Hydrolase;Manganese;Protease;Referenceproteome;Secreted;Signal	+			Control vs CFNT		Dermcidin;Survival-promoting peptide;DCD-1	DCD	P81605	P81605	DCD_HUMAN	4	4749100000	241	0.00404106	0.021791	-2.59018
23.7631	20.1261	25.339	19.7673	21.1402	20.0218	24.082	24.6658	25.304	23.5507	24.2715	24.6165	24.2847	24.7486	22.2293	24.5778	25.961	24.7555	26.2244	24.9778	23.1979	28.258	25.1152	22.3717	20.7996	25.0384	24.3877	anatomical structure morphogenesis;cell differentiation;cell envelope organization;cellular component organization;cellular component organization or biogenesis;cellular developmental process;cellular macromolecule metabolic process;cellular metabolic process;cellular process;cellular protein metabolic process;developmental process;epidermal cell differentiation;epithelial cell differentiation;ex…	binding;catalytic activity;cation binding;ion binding;metal ion binding;protein-glutamine gamma-glutamyltransferase activity;transferase activity;transferase activity, transferring acyl groups;transferase activity, transferring amino-acyl groups	adherens junction;anchoring junction;cell junction;cell part;cell-cell adherens junction;cell-cell junction;cornified envelope;cytoskeleton;extracellular membrane-bounded organelle;extracellular organelle;extracellular region part;extracellular vesicular exosome;intracellular non-membrane-bounded organelle;intracellular organelle;intracellular part;intrinsic to membrane;membrane part;membrane-bou…		ALTEMEIER_RESPONSE_TO_LPS_WITH_MECHANICAL_VENTILATION;AMIT_SERUM_RESPONSE_240_MCF10A;BILD_MYC_ONCOGENIC_SIGNATURE;CAGGTG_V$E12_Q6;chr14q11;CORNIFIED_ENVELOPE;COULOUARN_TEMPORAL_TGFB1_SIGNATURE_DN;CTIP_DN.V1_DN;CTTTGA_V$LEF1_Q2;CYTOSKELETON;DODD_NASOPHARYNGEAL_CARCINOMA_UP;ENK_UV_RESPONSE_EPIDERMIS_UP;ESC_J1_UP_EARLY.V1_DN;ESC_J1_UP_LATE.V1_DN;ESC_V6.5_UP_EARLY.V1_DN;ESC_V6.5_UP_LATE.V1_DN;FORTSCH…	---	3D-structure;Acyltransferase;Alternativesplicing;Calcium;Completeproteome;Diseasemutation;Ichthyosis;Keratinization;Lipoprotein;Membrane;Metal-binding;Phosphoprotein;Polymorphism;Referenceproteome;Transferase	+			Control vs CFNT		Protein-glutamine gamma-glutamyltransferase K	TGM1	P22735	P22735	TGM1_HUMAN	18	1207200000	151	0.00808385	0.0328762	-2.26199
20.1371	18.6442	19.0959	20.6856	19.6621	18.7964	19.0089	18.8961	24.696	23.0105	19.6693	20.7382	19.6391	24.7428	21.3242	18.7673	23.0337	19.1687	21.4373	21.4317	19.7122	32.271	19.139	22.2442	18.5484	21.0433	23.6611	amine biosynthetic process;amine catabolic process;amine metabolic process;biological regulation;biosynthetic process;carboxylic acid biosynthetic process;carboxylic acid catabolic process;carboxylic acid metabolic process;catabolic process;cell communication;cell proliferation;cell-cell signaling;cellular amine metabolic process;cellular amino acid biosynthetic process;cellular amino acid catabo…	acid-ammonia (or amide) ligase activity;adenyl nucleotide binding;adenyl ribonucleotide binding;amine binding;amino acid binding;ammonia ligase activity;ATP binding;binding;carbon-carbon lyase activity;carboxylic acid binding;carboxy-lyase activity;catalytic activity;cation binding;glutamate binding;glutamate decarboxylase activity;glutamate-ammonia ligase activity;identical protein binding;ion b…	axon part;axon terminus;cell part;cell projection part;cytoplasm;cytoplasmic part;cytosol;endoplasmic reticulum;extracellular membrane-bounded organelle;extracellular organelle;extracellular region part;extracellular vesicular exosome;intracellular membrane-bounded organelle;intracellular organelle;intracellular part;macromolecular complex;membrane-bounded organelle;membrane-bounded vesicle;mitoc…	Alanine, aspartate and glutamate metabolism;Arginine and proline metabolism;Nitrogen metabolism;Two-component system	AMIT_SERUM_RESPONSE_40_MCF10A;BAELDE_DIABETIC_NEPHROPATHY_DN;BARIS_THYROID_CANCER_UP;BLALOCK_ALZHEIMERS_DISEASE_DN;BLALOCK_ALZHEIMERS_DISEASE_INCIPIENT_DN;BOYAULT_LIVER_CANCER_SUBCLASS_G56_UP;BURTON_ADIPOGENESIS_4;BYSTRYKH_HEMATOPOIESIS_STEM_CELL_QTL_TRANS;CAIRO_HEPATOBLASTOMA_CLASSES_DN;CAIRO_HEPATOBLASTOMA_UP;CASORELLI_ACUTE_PROMYELOCYTIC_LEUKEMIA_DN;CAVARD_LIVER_CANCER_MALIGNANT_VS_BENIGN;CHEN…	---	3D-structure;Acetylation;ATP-binding;Completeproteome;Cytoplasm;Diseasemutation;Ligase;Lyase;Mitochondrion;Nucleotide-binding;Phosphoprotein;Referenceproteome;Ublconjugation	+			Control vs CFNT		Glutamine synthetase	GLUL	P15104	P15104	GLNA_HUMAN	14	3916500000	121	0.0122127	0.0443284	-2.10578
23.9881	23.645	23.8516	22.9171	22.9673	21.6544	22.8991	25.5689	24.6312	24.4449	25.1936	25.5519	25.1862	24.1506	23.6316	24.8213	26.4835	27.4032	25.1556	26.8291	17.0722	19.5197	26.5202	22.0218	23.532	27.2132	26.0389	biological adhesion;biological regulation;cell adhesion;cell differentiation;cell-cell adhesion;cellular developmental process;cellular macromolecule metabolic process;cellular metabolic process;cellular process;cellular protein metabolic process;developmental process;epidermal cell differentiation;epithelial cell differentiation;keratinocyte differentiation;macromolecule metabolic process;macrom…	binding;binding, bridging;cysteine-type endopeptidase inhibitor activity;endopeptidase inhibitor activity;endopeptidase regulator activity;enzyme binding;enzyme inhibitor activity;enzyme regulator activity;peptidase inhibitor activity;peptidase regulator activity;protease binding;protein binding;protein binding, bridging;structural molecule activity	cell part;cornified envelope;cytoplasm;cytoskeleton;extracellular membrane-bounded organelle;extracellular organelle;extracellular region part;extracellular space;extracellular vesicular exosome;intracellular membrane-bounded organelle;intracellular non-membrane-bounded organelle;intracellular organelle;intracellular organelle part;intracellular part;membrane-bounded organelle;membrane-bounded ve…		ALK_DN.V1_UP;ATF2_S_UP.V1_DN;BIOPOLYMER_METABOLIC_PROCESS;BIOPOLYMER_MODIFICATION;BLUM_RESPONSE_TO_SALIRASIB_UP;BROWN_MYELOID_CELL_DEVELOPMENT_UP;BRUINS_UVC_RESPONSE_VIA_TP53_GROUP_A;CELLULAR_MACROMOLECULE_METABOLIC_PROCESS;CELLULAR_PROTEIN_METABOLIC_PROCESS;chr3q21;CHUNG_BLISTER_CYTOTOXICITY_DN;CORNIFIED_ENVELOPE;CREIGHTON_ENDOCRINE_THERAPY_RESISTANCE_1;CTTTAAR_UNKNOWN;CYTOSKELETON;DIAZ_CHRONIC_…	---	3D-structure;Acetylation;Celladhesion;Completeproteome;Cytoplasm;Directproteinsequencing;Ichthyosis;Polymorphism;Proteaseinhibitor;Referenceproteome;Thiolproteaseinhibitor	+			Control vs CFNT		Cystatin-A;Cystatin-A, N-terminally processed	CSTA	P01040	P01040	CYTA_HUMAN	8	1726200000	152	0.00200935	0.02104	-1.85379
20.9402	19.0889	19.8033	22.1313	21.2753	22.3974	21.6421	21.2082	20.9361	22.4822	23.1631	25.9541	22.623	22.4499	22.6695	21.6525	22.7304	21.7423	22.5046	23.3094	18.1319	18.4058	22.8271	21.0304	22.936	22.3017	21.9831	amine transport;amino acid transport;carboxylic acid transport;cellular process;establishment of localization;extracellular amino acid transport;extracellular transport;glutamine transport;ion transport;neutral amino acid transport;nitrogen compound transport;organic acid transport;organic substance transport;transmembrane transport;transport	active transmembrane transporter activity;amine transmembrane transporter activity;amino acid transmembrane transporter activity;anion transmembrane transporter activity;anion:cation symporter activity;carboxylic acid transmembrane transporter activity;cation transmembrane transporter activity;dicarboxylic acid transmembrane transporter activity;inorganic cation transmembrane transporter activity…	cell part;cytoplasmic membrane-bounded vesicle;cytoplasmic part;cytoplasmic vesicle;extracellular membrane-bounded organelle;extracellular organelle;extracellular region part;extracellular vesicular exosome;Golgi apparatus;integral to membrane;integral to plasma membrane;intracellular membrane-bounded organelle;intracellular organelle;intracellular part;intrinsic to membrane;intrinsic to plasma m…	Protein digestion and absorption	ACTIVE_TRANSMEMBRANE_TRANSPORTER_ACTIVITY;AGUIRRE_PANCREATIC_CANCER_COPY_NUMBER_UP;ALK_DN.V1_UP;AMINE_TRANSMEMBRANE_TRANSPORTER_ACTIVITY;AMINE_TRANSPORT;AMINO_ACID_TRANSMEMBRANE_TRANSPORTER_ACTIVITY;AMINO_ACID_TRANSPORT;AMIT_EGF_RESPONSE_480_HELA;BASAKI_YBX1_TARGETS_UP;BERENJENO_TRANSFORMED_BY_RHOA_DN;BLUM_RESPONSE_TO_SALIRASIB_UP;BMI1_DN.V1_UP;BROWN_MYELOID_CELL_DEVELOPMENT_DN;BURTON_ADIPOGENESI…	---	Acetylation;Alternativeinitiation;Alternativesplicing;Cellmembrane;Completeproteome;Glycoprotein;Hostcellreceptorforvirusentry;Membrane;Phosphoprotein;Polymorphism;Receptor;Referenceproteome;Symport;Transmembrane;Transmembranehelix;Transport	+			Control vs CFNT		Neutral amino acid transporter B(0)	SLC1A5	Q15758	Q15758	AAAT_HUMAN	4	210990000	35	0.00764576	0.0380968	-1.62392
24.6352	24.343	26.3751	25.5842	26.0434	24.7764	25.2783	27.055	27.1377	26.202	26.553	27.5585	26.8961	26.8069	25.893	27.4049	27.8309	27.8824	26.2148	29.1988	24.5057	30.1943	29.4148	25.9556	25.6869	28.8067	28.0298	adherens junction assembly;adherens junction organization;anatomical structure development;biological adhesion;biological regulation;cell adhesion;cell junction assembly;cell junction organization;cell migration;cell motility;cell surface receptor linked signaling pathway;cell-cell adhesion;cell-cell junction assembly;cell-cell junction organization;cellular component assembly;cellular component …	alpha-catenin binding;binding;cadherin binding;cell adhesion molecule binding;enzyme binding;identical protein binding;molecular transducer activity;phosphatase binding;protein binding;protein binding transcription factor activity;protein dimerization activity;protein homodimerization activity;protein phosphatase binding;signal transducer activity;structural constituent of cell wall;structural mo…	actin cytoskeleton;adherens junction;anchoring junction;apicolateral plasma membrane;catenin complex;catenin-TCF7L2 complex;cell junction;cell part;cell-cell adherens junction;cell-cell contact zone;cell-cell junction;cell-substrate adherens junction;cell-substrate junction;contractile fiber part;cytoplasm;cytoplasmic part;cytoskeletal part;cytoskeleton;cytosol;cytosolic part;desmosome;extracellu…	Acute myeloid leukemia;Arrhythmogenic right ventricular cardiomyopathy (ARVC);Pathways in cancer	AACTTT_UNKNOWN;ACCAAAG,MIR-9;ACCTGTTG_UNKNOWN;AMIT_EGF_RESPONSE_120_HELA;ATF2_S_UP.V1_DN;ATF2_UP.V1_DN;BAE_BRCA1_TARGETS_UP;BENPORATH_NANOG_TARGETS;BENPORATH_NOS_TARGETS;BENPORATH_OCT4_TARGETS;BENPORATH_SOX2_TARGETS;BRUINS_UVC_RESPONSE_VIA_TP53_GROUP_B;BURTON_ADIPOGENESIS_9;CAGGTA_V$AREB6_01;CAGGTG_V$E12_Q6;CELL_FRACTION;CHARAFE_BREAST_CANCER_LUMINAL_VS_MESENCHYMAL_UP;CHIARADONNA_NEOPLASTIC_TRANS…	---	3D-structure;Acetylation;Cardiomyopathy;Celladhesion;Celljunction;Completeproteome;Cytoplasm;Cytoskeleton;Directproteinsequencing;Diseasemutation;Glycoprotein;Membrane;Palmoplantarkeratoderma;Phosphoprotein;Polymorphism;Referenceproteome;Repeat	+			Control vs CFNT		Junction plakoglobin	JUP	P14923	P14923	PLAK_HUMAN	25	9436200000	608	0.00122633	0.0193333	-1.62026
19.6339	20.4806	20.0415	19.6944	20.3695	19.7534	18.8587	20.4441	21.2374	22.3172	19.761	21.7561	21.4871	20.3833	21.7706	21.6034	22.0446	21.6393	21.1772	21.6555	18.9033	29.2004	21.9092	19.9007	19.0425	19.9101	20.579	anatomical structure development;apoptosis;biological regulation;cardiac cell development;cardiac muscle cell development;cell cycle;cell cycle process;cell death;cell development;cellular component disassembly;cellular component disassembly at cellular level;cellular component disassembly involved in apoptosis;cellular component organization;cellular component organization at cellular level;cell…	structural molecule activity	cell part;cytoplasm;cytoplasmic part;cytoskeletal part;cytosol;envelope;intermediate filament;intracellular membrane-bounded organelle;intracellular organelle;intracellular organelle part;intracellular part;lamin filament;macromolecular complex;membrane;membrane-bounded organelle;nuclear body;nuclear envelope;nuclear inner membrane;nuclear lamina;nuclear membrane;nuclear part;nuclear speck;nucleo…	Arrhythmogenic right ventricular cardiomyopathy (ARVC);Dilated cardiomyopathy;Hypertrophic cardiomyopathy (HCM)	AACTTT_UNKNOWN;ACCAAAG,MIR-9;ACEVEDO_LIVER_TUMOR_VS_NORMAL_ADJACENT_TISSUE_UP;ALCALAY_AML_BY_NPM1_LOCALIZATION_UP;AMUNDSON_POOR_SURVIVAL_AFTER_GAMMA_RADIATION_2G;BASAKI_YBX1_TARGETS_UP;BENPORATH_CYCLING_GENES;BENPORATH_MYC_TARGETS_WITH_EBOX;BIOCARTA_CASPASE_PATHWAY;BIOCARTA_DEATH_PATHWAY;BIOCARTA_FAS_PATHWAY;BIOCARTA_HIVNEF_PATHWAY;BIOCARTA_TNFR1_PATHWAY;BLALOCK_ALZHEIMERS_DISEASE_UP;BLUM_RESPONS…	---	3D-structure;Acetylation;Alternativesplicing;Cardiomyopathy;Charcot-Marie-Toothdisease;Coiledcoil;Completeproteome;Congenitalmusculardystrophy;Directproteinsequencing;Diseasemutation;Emery-Dreifussmusculardystrophy;Intermediatefilament;Isopeptidebond;Limb-girdlemusculardystrophy;Lipoprotein;Membrane;Methylation;Neurodegeneration;Neuropathy;Nucleus;Phosphoprotein;Polymorphism;Prenylation;Reference…	+			Control vs CFNT		Prelamin-A/C;Lamin-A/C	LMNA	P02545;Q03252	P02545	LMNA_HUMAN	22	908030000	85	8.49238e-05	0.00733333	-1.49321
25.9893	24.8947	25.8631	25.2718	25.6913	25.0629	26.5866	27.1557	27.0841	26.2039	27.2536	27.3912	27.4391	26.3999	25.6471	27.2305	28.0079	27.9342	26.1646	28.2019	23.7887	26.9942	28.6333	25.5134	25.5426	28.8378	28.0188	anatomical structure development;apoptosis;biological adhesion;biological regulation;BMP signaling pathway;calcium-dependent cell-cell adhesion;cell adhesion;cell death;cell differentiation;cell junction assembly;cell junction organization;cell surface receptor linked signaling pathway;cell-cell adhesion;cell-cell junction assembly;cell-cell junction organization;cellular component assembly;cellu…	binding;calcium ion binding;cation binding;gamma-catenin binding;ion binding;metal ion binding;protein binding;toxin binding	anchoring junction;apical plasma membrane;cell junction;cell part;cell-cell junction;cytoplasmic part;cytosol;desmosome;extracellular membrane-bounded organelle;extracellular organelle;extracellular region part;extracellular vesicular exosome;integral to membrane;internal side of plasma membrane;intracellular part;intrinsic to membrane;lateral plasma membrane;membrane;membrane part;membrane-bound…	Staphylococcus aureus infection	ALFANO_MYC_TARGETS;CHANG_IMMORTALIZED_BY_HPV31_DN;CHIANG_LIVER_CANCER_SUBCLASS_CTNNB1_UP;chr18q12;CHYLA_CBFA2T3_TARGETS_UP;CTTTGA_V$LEF1_Q2;CTTTGT_V$LEF1_Q2;CYCLIN_D1_KE_.V1_DN;GGGTGGRR_V$PAX4_03;GGGYGTGNY_UNKNOWN;GSE12845_IGD_POS_BLOOD_VS_NAIVE_TONSIL_BCELL_UP;GSE13306_TREG_VS_TCONV_LAMINA_PROPRIA_UP;GSE15324_ELF4_KO_VS_WT_NAIVE_CD8_TCELL_DN;GSE17974_IL4_AND_ANTI_IL12_VS_UNTREATED_72H_ACT_CD4_TC…	---	Alternativesplicing;Calcium;Celladhesion;Celljunction;Cellmembrane;Cleavageonpairofbasicresidues;Completeproteome;Diseasemutation;Glycoprotein;Hypotrichosis;Membrane;Metal-binding;Palmoplantarkeratoderma;Phosphoprotein;Polymorphism;Referenceproteome;Repeat;Signal;Transmembrane;Transmembranehelix	+			Control vs CFNT		Desmoglein-1	DSG1	Q02413;Q86SJ6	Q02413	DSG1_HUMAN	26	5862900000	604	0.00264911	0.0278261	-1.26541
25.26	25.7314	24.4409	25.8492	24.5519	25.4146	25.1203	24.7807	27.3974	26.5325	26.259	26.2912	25.7437	26.947	28.0009	25.3026	25.8592	25.9712	24.5672	27.9805	25.1882	22.153	26.1107	25.7551	28.9029	25.4647	23.4868	alcohol metabolic process;carbohydrate metabolic process;cellular carbohydrate metabolic process;cellular metabolic process;cellular process;hexose metabolic process;mannose metabolic process;metabolic process;monosaccharide metabolic process;primary metabolic process;small molecule metabolic process	alpha-mannosidase activity;binding;carbohydrate binding;catalytic activity;cation binding;hydrolase activity;hydrolase activity, acting on glycosyl bonds;hydrolase activity, hydrolyzing O-glycosyl compounds;ion binding;mannosidase activity;metal ion binding;transition metal ion binding;zinc ion binding	extracellular membrane-bounded organelle;extracellular organelle;extracellular region part;extracellular vesicular exosome;membrane-bounded organelle;membrane-bounded vesicle;organelle;vesicle	Other glycan degradation	ACEVEDO_LIVER_CANCER_DN;ACEVEDO_LIVER_TUMOR_VS_NORMAL_ADJACENT_TISSUE_DN;AKT_UP.V1_UP;AKT_UP_MTOR_DN.V1_UP;BROWNE_HCMV_INFECTION_1HR_DN;BROWNE_HCMV_INFECTION_48HR_DN;CHANDRAN_METASTASIS_DN;CHEOK_RESPONSE_TO_MERCAPTOPURINE_AND_LD_MTX_DN;chr4p16;GRAESSMANN_APOPTOSIS_BY_SERUM_DEPRIVATION_DN;GRAESSMANN_RESPONSE_TO_MC_AND_SERUM_DEPRIVATION_DN;GSE13411_SWITCHED_MEMORY_BCELL_VS_PLASMA_CELL_UP;GSE1432_6H…	---	Alternativesplicing;Completeproteome;Glycoprotein;Glycosidase;Hydrolase;Metal-binding;Polymorphism;Referenceproteome;Secreted;Signal;Zinc	+			Control vs CFNT		Epididymis-specific alpha-mannosidase	MAN2B2	Q9Y2E5	Q9Y2E5	MA2B2_HUMAN	24	4225000000	444	0.00545663	0.0388571	-1.26074
30.4866	30.4079	31.0378	30.8992	30.6065	30.9304	30.822	31.2817	29.4315	29.2627	29.5447	29.0825	30.5509	30.8818	30.0823	30.0508	29.4147	30.8025	30.3153	29.9716	29.061	28.3129	30.2035	29.8533	30.5284	31.4512	29.9969			cell part;extracellular membrane-bounded organelle;extracellular organelle;extracellular region part;extracellular vesicular exosome;membrane;membrane-bounded organelle;membrane-bounded vesicle;organelle;vesicle		BYSTRYKH_HEMATOPOIESIS_STEM_CELL_QTL_TRANS;JOHNSTONE_PARVB_TARGETS_3_DN;KOYAMA_SEMA3B_TARGETS_DN;MAYBURD_RESPONSE_TO_L663536_UP;OSMAN_BLADDER_CANCER_DN;ZHOU_INFLAMMATORY_RESPONSE_FIMA_UP	---	3D-structure;Acetylation;Alternativesplicing;Completeproteome;Lipoprotein;Membrane;Methylation;Prenylation;Referenceproteome	+			Control vs CFNT		BRO1 domain-containing protein BROX	BROX	Q5VW32	Q5VW32	BROX_HUMAN	19	55771000000	1378	0.00164158	0.0347719	0.859738
25.5663	26.2129	26.4289	26.2873	26.0315	26.083	25.6031	26.7739	24.7803	24.3986	24.6924	25.4529	25.8053	26.4451	25.2726	25.7121	25.059	25.3468	25.4637	24.6643	22.5145	19.5554	25.7989	25.21	25.8169	25.8853	24.1684	anatomical structure development;anion transport;bicarbonate transport;cellular metabolic process;cellular process;developmental process;establishment of localization;inorganic anion transport;ion transport;metabolic process;one-carbon metabolic process;organ development;organic anion transport;response to chemical stimulus;response to drug;response to endogenous stimulus;response to hormone stim…	binding;carbonate dehydratase activity;carbon-oxygen lyase activity;catalytic activity;cation binding;hydro-lyase activity;ion binding;lyase activity;metal ion binding;transition metal ion binding;zinc ion binding	anchored to external side of plasma membrane;anchored to membrane;anchored to plasma membrane;apical plasma membrane;brush border membrane;cell part;cell projection membrane;cell projection part;cell surface;cytoplasmic part;cytoplasmic vesicle membrane;cytoplasmic vesicle part;endoplasmic reticulum;endoplasmic reticulum-Golgi intermediate compartment;extracellular membrane-bounded organelle;extr…	Nitrogen metabolism	BENPORATH_NANOG_TARGETS;BENPORATH_NOS_TARGETS;BENPORATH_OCT4_TARGETS;BENPORATH_SOX2_TARGETS;BOQUEST_STEM_CELL_DN;CARBON_OXYGEN_LYASE_ACTIVITY;CARBONATE_DEHYDRATASE_ACTIVITY;CELL_FRACTION;chr17q22;chr17q23;CTTTAAR_UNKNOWN;CTTTGA_V$LEF1_Q2;CUI_TCF21_TARGETS_2_UP;CYCLIN_D1_KE_.V1_UP;CYCLIN_D1_UP.V1_UP;DELACROIX_RAR_BOUND_ES;DELYS_THYROID_CANCER_DN;DEMAGALHAES_AGING_DN;ESC_J1_UP_LATE.V1_UP;ESC_V6.5_U…	---	3D-structure;Alternativesplicing;Cellmembrane;Completeproteome;Directproteinsequencing;Diseasemutation;Disulfidebond;Glycoprotein;GPI-anchor;Lipoprotein;Lyase;Membrane;Metal-binding;Polymorphism;Referenceproteome;Retinitispigmentosa;Signal;Zinc	+			Control vs CFNT		Carbonic anhydrase 4	CA4	P22748	P22748	CAH4_HUMAN	11	2127800000	216	0.0017791	0.0349153	0.865604
24.6664	23.9871	24.0172	24.427	24.4981	24.4821	24.7707	24.2429	22.4473	23.2008	22.9309	22.9195	23.2022	24.6423	23.8498	24.0121	23.0548	24.1227	24.0527	23.5912	19.0381	19.986	23.8519	23.1954	24.2802	24.649	23.6682	anatomical structure formation involved in morphogenesis;biological regulation;biosynthetic process;cell differentiation;cell projection assembly;cell projection organization;cellular biosynthetic process;cellular component assembly;cellular component assembly at cellular level;cellular component assembly involved in morphogenesis;cellular component maintenance;cellular component movement;cellula…	adenyl nucleotide binding;adenyl ribonucleotide binding;ATP binding;binding;catalytic activity;cation binding;cyclin-dependent protein kinase activity;ion binding;kinase activity;magnesium ion binding;metal ion binding;nucleotide binding;phosphotransferase activity, alcohol group as acceptor;protein binding transcription factor activity;protein kinase activity;protein serine/threonine kinase acti…	cell part;cell projection;centrosome;cilium;cytoplasm;cytoplasmic part;cytoskeletal part;cytosol;intracellular membrane-bounded organelle;intracellular non-membrane-bounded organelle;intracellular organelle;intracellular organelle part;intracellular part;membrane-bounded organelle;microtubule organizing center;midbody;mitotic spindle;non-membrane-bounded organelle;nonmotile primary cilium;nucleus…		AAAYWAACM_V$HFH4_01;AAGCACA,MIR-218;ACAACTT,MIR-382;ADENYL_NUCLEOTIDE_BINDING;ADENYL_RIBONUCLEOTIDE_BINDING;ASGHARZADEH_NEUROBLASTOMA_POOR_SURVIVAL_DN;ATGTTAA,MIR-302C;ATP_BINDING;BIOPOLYMER_METABOLIC_PROCESS;BIOPOLYMER_MODIFICATION;BROWNE_HCMV_INFECTION_12HR_DN;BRUINS_UVC_RESPONSE_VIA_TP53_GROUP_B;CAGTATT,MIR-200B,MIR-200C,MIR-429;CAHOY_OLIGODENDROCUTIC;CELLULAR_MACROMOLECULE_METABOLIC_PROCESS;C…	---	Alternativesplicing;ATP-binding;Cellprojection;Cilium;Ciliumbiogenesis/degradation;Completeproteome;Cytoplasm;Cytoskeleton;Developmentalprotein;Differentiation;Diseasemutation;Kinase;Magnesium;Metal-binding;Nucleotide-binding;Nucleus;Phosphoprotein;Polymorphism;Referenceproteome;Retinitispigmentosa;Serine/threonine-proteinkinase;Spermatogenesis;Transcription;Transcriptionregulation;Transferase	+			Control vs CFNT		Serine/threonine-protein kinase ICK	ICK	Q9UPZ9;P20794	Q9UPZ9	ICK_HUMAN	7	709740000	85	0.00187796	0.0353391	0.884246
30.3658	30.2364	30.9962	30.7449	30.702	30.8212	30.5881	31.1424	28.9422	29.194	29.198	28.9981	30.3776	30.9721	30.0149	29.9254	29.773	30.4964	30.1547	29.5647	27.9303	27.6615	30.2103	30.1162	30.5055	31.1148	29.8534	biological regulation;positive regulation of biological process;positive regulation of cell migration;positive regulation of cell motility;positive regulation of cellular component movement;positive regulation of cellular process;positive regulation of epithelial cell migration;positive regulation of locomotion;regulation of biological process;regulation of cell migration;regulation of cell motil…	calcium-dependent cysteine-type endopeptidase activity;catalytic activity;cysteine-type endopeptidase activity;cysteine-type peptidase activity;endopeptidase activity;hydrolase activity;peptidase activity;peptidase activity, acting on L-amino acid peptides	cell part;cytoplasm;extracellular membrane-bounded organelle;extracellular organelle;extracellular region part;extracellular vesicular exosome;intracellular organelle part;intracellular part;membrane-bounded organelle;membrane-bounded vesicle;nuclear part;nucleoplasm;organelle;organelle part;vesicle		ACTTTAT,MIR-142-5P;BENPORATH_CYCLING_GENES;BORCZUK_MALIGNANT_MESOTHELIOMA_UP;BROWNE_HCMV_INFECTION_18HR_UP;BROWNE_HCMV_INFECTION_48HR_DN;BROWNE_HCMV_INFECTION_4HR_DN;BURTON_ADIPOGENESIS_12;BYSTRYKH_HEMATOPOIESIS_STEM_CELL_QTL_TRANS;chr3p24;CONCANNON_APOPTOSIS_BY_EPOXOMICIN_UP;DIAZ_CHRONIC_MEYLOGENOUS_LEUKEMIA_UP;GAZDA_DIAMOND_BLACKFAN_ANEMIA_MYELOID_UP;GGGCGGR_V$SP1_Q6;GSE1448_CTRL_VS_ANTI_VALPHA…	---	3D-structure;Acetylation;Completeproteome;Hydrolase;Nucleus;Phosphoprotein;Protease;Referenceproteome;Repeat;Thiolprotease	+			Control vs CFNT		Calpain-7	CAPN7	Q9Y6W3	Q9Y6W3	CAN7_HUMAN	59	53348000000	2641	0.00175608	0.0340727	0.8987
27.3353	27.8356	27.0988	27.8648	27.7689	27.5978	27.0977	27.6955	26.7672	26.0388	26.4742	26.1129	26.5256	27.0069	27.2243	26.5763	26.433	27.4696	27.0378	25.8399	26.9967	24.5627	26.9886	27.3833	27.199	26.5352	26.0044	anatomical structure morphogenesis;developmental process	binding;carboxypeptidase activity;catalytic activity;cation binding;exopeptidase activity;hydrolase activity;ion binding;metal ion binding;metallocarboxypeptidase activity;metalloexopeptidase activity;metallopeptidase activity;peptidase activity;peptidase activity, acting on L-amino acid peptides;transition metal ion binding;zinc ion binding	anchored to membrane;cell part;cell surface;extracellular membrane-bounded organelle;extracellular organelle;extracellular region part;extracellular vesicular exosome;intrinsic to membrane;membrane;membrane part;membrane-bounded organelle;membrane-bounded vesicle;organelle;plasma membrane;vesicle		ACTACCT,MIR-196A,MIR-196B;ANATOMICAL_STRUCTURE_DEVELOPMENT;ANATOMICAL_STRUCTURE_MORPHOGENESIS;BASAKI_YBX1_TARGETS_DN;BENPORATH_ES_WITH_H3K27ME3;BLALOCK_ALZHEIMERS_DISEASE_INCIPIENT_UP;BLALOCK_ALZHEIMERS_DISEASE_UP;BOYLAN_MULTIPLE_MYELOMA_D_UP;BOYLAN_MULTIPLE_MYELOMA_PCA1_DN;CAIRO_LIVER_DEVELOPMENT_UP;CHICAS_RB1_TARGETS_CONFLUENT;chr12q15;CTACCTC,LET-7A,LET-7B,LET-7C,LET-7D,LET-7E,LET-7F,MIR-98,LE…	---	3D-structure;Carboxypeptidase;Cellmembrane;Completeproteome;Directproteinsequencing;Disulfidebond;Glycoprotein;GPI-anchor;Hydrolase;Lipoprotein;Membrane;Metal-binding;Metalloprotease;Polymorphism;Protease;Referenceproteome;Signal;Zinc	+			Control vs CFNT		Carboxypeptidase M	CPM	P14384	P14384	CBPM_HUMAN	13	5445200000	434	0.000228057	0.0212444	0.911258
26.3802	26.5395	26.524	25.9372	25.8515	25.805	26.6435	26.3522	25.3492	24.7601	24.4131	24.7578	25.1427	25.5883	25.9755	25.2125	26.196	25.6266	25.9397	25.0139	25.0261	24.3058	25.9215	25.8466	25.4546	26.2824	25.5734	anatomical structure development;biological regulation;calcium ion transmembrane transport;calcium ion transport;cation transport;cell development;cellular component organization;cellular component organization or biogenesis;cellular developmental process;cellular metabolic process;cellular process;developmental process;divalent inorganic cation transport;divalent metal ion transport;energy deriv…	binding;calcium channel activity;calcium channel regulator activity;cation binding;cation channel activity;cation transmembrane transporter activity;channel activity;channel regulator activity;gated channel activity;ion binding;ion channel activity;ion transmembrane transporter activity;metal ion binding;passive transmembrane transporter activity;substrate-specific channel activity;substrate-spec…	calcium channel complex;cation channel complex;cell part;cytoplasmic part;endoplasmic reticulum;extracellular membrane-bounded organelle;extracellular organelle;extracellular region part;extracellular vesicular exosome;intracellular membrane-bounded organelle;intracellular organelle;intracellular part;ion channel complex;macromolecular complex;membrane;membrane part;membrane-bounded organelle;mem…	Arrhythmogenic right ventricular cardiomyopathy (ARVC);Cardiac muscle contraction;Dilated cardiomyopathy;Hypertrophic cardiomyopathy (HCM);MAPK signaling pathway	ACEVEDO_FGFR1_TARGETS_IN_PROSTATE_CANCER_MODEL_DN;ACTGCCT,MIR-34B;ACTGTAG,MIR-139;ATGCTGC,MIR-103,MIR-107;ATGGYGGA_UNKNOWN;BENPORATH_NANOG_TARGETS;BENPORATH_NOS_TARGETS;BENPORATH_OCT4_TARGETS;BENPORATH_SOX2_TARGETS;BRUINS_UVC_RESPONSE_VIA_TP53_GROUP_A;CAGGTG_V$E12_Q6;CAGNYGKNAAA_UNKNOWN;CALCIUM_CHANNEL_ACTIVITY;CALCIUM_ION_TRANSPORT;CATION_CHANNEL_ACTIVITY;CATION_TRANSMEMBRANE_TRANSPORTER_ACTIVIT…	---	Alternativesplicing;Calcium;Calciumchannel;Calciumtransport;Completeproteome;Disulfidebond;Glycoprotein;Ionchannel;Iontransport;Membrane;Metal-binding;Polymorphism;Referenceproteome;Signal;Transmembrane;Transmembranehelix;Transport;Voltage-gatedchannel	+			Control vs CFNT		Voltage-dependent calcium channel subunit alpha-2/delta-1;Voltage-dependent calcium channel subunit alpha-2-1;Voltage-dependent calcium channel subunit delta-1	CACNA2D1	P54289;Q9NY47	P54289	CA2D1_HUMAN	20	2044200000	299	0.000514145	0.0222286	0.922854
26.3483	25.9811	26.8504	26.5314	26.8945	26.6543	26.3697	26.8682	24.8761	24.97	24.3182	25.4808	25.9495	26.7887	25.763	25.7122	25.6503	26.5043	26.0871	25.3277	24.1727	23.9377	26.2823	26.0268	26.05	26.9059	25.3705	anatomical structure formation involved in morphogenesis;anatomical structure morphogenesis;axis specification;biological regulation;cell migration;cell morphogenesis;cell morphogenesis involved in differentiation;cell motility;cell projection assembly;cell projection organization;cell surface receptor linked signaling pathway;cellular component assembly;cellular component assembly at cellular le…	binding;GTP binding;guanyl nucleotide binding;guanyl ribonucleotide binding;nucleotide binding;purine nucleotide binding;purine ribonucleoside triphosphate binding;purine ribonucleotide binding;ribonucleotide binding	cell part;cell projection;cell projection membrane;cell projection part;cilium;cilium membrane;cilium part;intracellular;intracellular organelle part;intracellular part;membrane part;organelle part;plasma membrane part;primary cilium		chr3q11;CUI_TCF21_TARGETS_2_DN;DOUGLAS_BMI1_TARGETS_UP;GSE11057_EFF_MEM_VS_CENT_MEM_CD4_TCELL_UP;GSE17974_0H_VS_4H_IN_VITRO_ACT_CD4_TCELL_DN;GSE20366_EX_VIVO_VS_HOMEOSTATIC_CONVERSION_TREG_UP;GSE27786_NKCELL_VS_NKTCELL_UP;GSE30962_PRIMARY_VS_SECONDARY_ACUTE_LCMV_INF_CD8_TCELL_DN;GSE7852_LN_VS_FAT_TREG_DN;GSE7852_THYMUS_VS_FAT_TREG_DN;PYEON_CANCER_HEAD_AND_NECK_VS_CERVICAL_UP;ROME_INSULIN_TARGETS_…	---	Alternativesplicing;Cellmembrane;Cellprojection;Ciliopathy;Cilium;Coiledcoil;Completeproteome;Diseasemutation;GTP-binding;Isopeptidebond;Joubertsyndrome;Lipoprotein;Membrane;Nucleotide-binding;Palmitate;Polymorphism;Referenceproteome;Ublconjugation	+			Control vs CFNT		ADP-ribosylation factor-like protein 13B	ARL13B	Q3SXY8	Q3SXY8	AR13B_HUMAN	12	3016700000	393	0.00213889	0.0344643	0.943247
30.7557	30.7763	31.2936	31.1777	31.0603	31.2271	31.0649	31.3402	29.3654	29.3318	29.5454	29.3487	30.6116	31.1956	30.2599	30.2805	29.7037	30.8836	30.6454	29.9474	28.6679	27.6834	30.2861	30.3946	30.7029	31.381	30.4547	abscission;ATP metabolic process;biological regulation;catabolic process;cell cycle process;cell differentiation;cell division;cell proliferation;cellular catabolic process;cellular component disassembly;cellular component disassembly at cellular level;cellular component organization;cellular component organization at cellular level;cellular component organization or biogenesis;cellular component…	adenyl nucleotide binding;adenyl ribonucleotide binding;ATP binding;ATPase activity;ATPase activity, coupled;binding;catalytic activity;cation binding;hydrolase activity;hydrolase activity, acting on acid anhydrides;hydrolase activity, acting on acid anhydrides, in phosphorus-containing anhydrides;ion binding;magnesium ion binding;metal ion binding;microtubule-severing ATPase activity;nucleoside-…	cell part;centrosome;chromosome;cytoplasm;cytoplasmic part;cytoskeletal part;cytosol;early endosome;endosomal part;endosome;endosome membrane;extracellular membrane-bounded organelle;extracellular organelle;extracellular region part;extracellular vesicular exosome;intracellular membrane-bounded organelle;intracellular non-membrane-bounded organelle;intracellular organelle;intracellular organelle …	Endocytosis	ADENYL_NUCLEOTIDE_BINDING;ADENYL_RIBONUCLEOTIDE_BINDING;ATP_BINDING;BERENJENO_TRANSFORMED_BY_RHOA_UP;BOCHKIS_FOXA2_TARGETS;BURTON_ADIPOGENESIS_3;BYSTRYKH_HEMATOPOIESIS_STEM_CELL_QTL_TRANS;CHIARADONNA_NEOPLASTIC_TRANSFORMATION_KRAS_UP;CHICAS_RB1_TARGETS_GROWING;CHNG_MULTIPLE_MYELOMA_HYPERPLOID_DN;chr16q23;chr7p12;CTGCAGY_UNKNOWN;CYTOPLASM;CYTOPLASMIC_PART;CYTOSOL;DELACROIX_RAR_BOUND_ES;DODD_NASOPH…	REACTOME_ENDOSOMAL_SORTING_COMP_Yes	3D-structure;Acetylation;Alternativesplicing;ATP-binding;Cellcycle;Celldivision;Completeproteome;Endosome;Hydrolase;Magnesium;Membrane;Metal-binding;Nucleotide-binding;Nucleus;Phosphoprotein;Polymorphism;Proteintransport;Referenceproteome;Transport	+			Control vs CFNT		Vacuolar protein sorting-associated protein 4A	VPS4A	Q9UN37;Q6PIW4	Q9UN37	VPS4A_HUMAN	29	64960000000	1702	0.000602326	0.0218788	0.993725
29.03	28.7283	29.3776	29.3186	29.0749	29.2516	29.1728	29.7265	28.0423	27.7297	27.4347	27.4744	28.8099	29.2976	28.5151	28.2562	27.8767	28.744	27.9068	28.0218	26.6992	25.3665	28.4985	28.722	29.2498	29.4076	27.891	carbohydrate metabolic process;carboxylic acid metabolic process;cellular ketone metabolic process;cellular macromolecule metabolic process;cellular metabolic process;cellular process;cellular protein metabolic process;establishment of localization;establishment of protein localization;macromolecule metabolic process;macromolecule modification;metabolic process;organic acid metabolic process;oxoa…	catalytic activity;oxidoreductase activity;oxidoreductase activity, acting on CH-OH group of donors;oxidoreductase activity, acting on the CH-OH group of donors, NAD or NADP as acceptor	extracellular membrane-bounded organelle;extracellular organelle;extracellular region part;extracellular vesicular exosome;membrane-bounded organelle;membrane-bounded vesicle;organelle;vesicle		chr11p15;GSE13738_RESTING_VS_BYSTANDER_ACTIVATED_CD4_TCELL_DN;GSE13738_RESTING_VS_TCR_ACTIVATED_CD4_TCELL_DN;GSE14000_TRANSLATED_RNA_VS_MRNA_4H_LPS_DC_UP;GSE14000_UNSTIM_VS_16H_LPS_DC_TRANSLATED_RNA_DN;GSE1432_6H_VS_24H_IFNG_MICROGLIA_UP;GSE1460_DP_THYMOCYTE_VS_THYMIC_STROMAL_CELL_DN;GSE15324_NAIVE_VS_ACTIVATED_ELF4_KO_CD8_TCELL_DN;GSE17721_LPS_VS_CPG_16H_BMDM_DN;GSE17721_LPS_VS_CPG_24H_BMDM_DN;G…	---	3D-structure;Alternativesplicing;Completeproteome;NAD;Referenceproteome;Ublconjugationpathway	+			Control vs CFNT		Ubiquitin-conjugating enzyme E2 variant 3	UEVLD	Q8IX04	Q8IX04	UEVLD_HUMAN	21	17808000000	1018	0.000169192	0.0146667	1.03427
30.5881	30.5514	31.3157	30.9163	30.9638	30.8534	30.7137	31.1969	29.3814	29.0314	29.3593	29.2788	30.4301	31.0394	29.8836	29.8363	30.2007	30.7883	29.4638	29.5369	28.7901	26.5325	30.3932	30.0802	30.5279	30.8495	29.9255	biological regulation;cell cycle process;cellular component assembly;cellular component assembly at cellular level;cellular component organization;cellular component organization at cellular level;cellular component organization or biogenesis;cellular component organization or biogenesis at cellular level;cellular macromolecular complex assembly;cellular macromolecular complex subunit organizatio…	alcohol binding;amine binding;binding;cation binding;ion binding;lipid binding;phosphatidylcholine binding;phospholipid binding;protein binding;protein domain specific binding;quaternary ammonium group binding	cell part;cytoplasmic part;cytosol;endosomal part;endosome membrane;extracellular membrane-bounded organelle;extracellular organelle;extracellular region part;extracellular vesicular exosome;intracellular organelle part;intracellular part;late endosome membrane;macromolecular complex;membrane;membrane coat;membrane part;membrane-bounded organelle;membrane-bounded vesicle;organelle;organelle membr…	Endocytosis	AGCYRWTTC_UNKNOWN;BERENJENO_TRANSFORMED_BY_RHOA_DN;BLALOCK_ALZHEIMERS_DISEASE_DN;BROWNE_HCMV_INFECTION_20HR_DN;CGGAARNGGCNG_UNKNOWN;CHARAFE_BREAST_CANCER_LUMINAL_VS_MESENCHYMAL_UP;chr19q13;ELLWOOD_MYC_TARGETS_DN;ENK_UV_RESPONSE_KERATINOCYTE_UP;FARMER_BREAST_CANCER_BASAL_VS_LULMINAL;GGAANCGGAANY_UNKNOWN;GSE13306_RA_VS_UNTREATED_TCONV_DN;GSE14308_TH1_VS_NATURAL_TREG_UP;GSE1448_ANTI_VALPHA2_VS_VBETA…	REACTOME_ENDOSOMAL_SORTING_COMP_Yes	Acetylation;Coiledcoil;Completeproteome;Directproteinsequencing;Endosome;Membrane;Phosphoprotein;Proteintransport;Referenceproteome;Transport;Ublconjugation	+			Control vs CFNT		Charged multivesicular body protein 2a	CHMP2A	O43633	O43633	CHM2A_HUMAN	13	56732000000	1249	0.000420795	0.0206667	1.03491
30.115	30.1054	30.5737	30.6177	29.9732	30.4194	30.4597	30.5242	29.1086	28.686	27.9872	28.5549	30.0291	30.6413	29.5572	29.4565	28.7528	29.9258	29.5826	29.0753	28.0869	27.4608	29.5156	29.426	30.0776	30.512	29.616	biological regulation;catabolic process;cation transport;cell cycle process;cellular catabolic process;cellular component disassembly;cellular component disassembly at cellular level;cellular component organization;cellular component organization at cellular level;cellular component organization or biogenesis;cellular component organization or biogenesis at cellular level;cellular macromolecular …	adenyl nucleotide binding;adenyl ribonucleotide binding;ATP binding;ATPase activity;ATPase activity, coupled;binding;catalytic activity;hydrolase activity;hydrolase activity, acting on acid anhydrides;hydrolase activity, acting on acid anhydrides, in phosphorus-containing anhydrides;identical protein binding;nucleoside-triphosphatase activity;nucleotide binding;protein binding;protein C-terminus …	cell part;centrosome;cytoplasm;cytoplasmic part;cytoskeletal part;cytosol;endosomal part;endosome;endosome membrane;extracellular membrane-bounded organelle;extracellular organelle;extracellular region part;extracellular vesicular exosome;intracellular membrane-bounded organelle;intracellular non-membrane-bounded organelle;intracellular organelle;intracellular organelle part;intracellular part;la…	Endocytosis	ATAACCT,MIR-154;ATPASE_ACTIVITY;ATPASE_ACTIVITY_COUPLED;BIOPOLYMER_METABOLIC_PROCESS;BUYTAERT_PHOTODYNAMIC_THERAPY_STRESS_UP;CACTGTG,MIR-128A,MIR-128B;CELLULAR_LOCALIZATION;CHEN_LIVER_METABOLISM_QTL_CIS;chr18q21;CTCAGGG,MIR-125B,MIR-125A;CYTOPLASM;CYTOPLASMIC_PART;DIAZ_CHRONIC_MEYLOGENOUS_LEUKEMIA_UP;ENDOSOME;ENDOSOME_TRANSPORT;ESTABLISHMENT_OF_CELLULAR_LOCALIZATION;ESTABLISHMENT_OF_LOCALIZATION;…	REACTOME_ENDOSOMAL_SORTING_COMP_Yes	3D-structure;Acetylation;ATP-binding;Cellcycle;Celldivision;Coiledcoil;Completeproteome;Endosome;Hydrolase;Membrane;Nucleotide-binding;Phosphoprotein;Polymorphism;Proteintransport;Referenceproteome;Transport	+			Control vs CFNT		Vacuolar protein sorting-associated protein 4B	VPS4B	O75351	O75351	VPS4B_HUMAN	27	39927000000	1599	0.000958948	0.0221622	1.06876
25.7263	24.9184	25.2179	25.3219	25.8431	25.9448	25.0035	26.1346	22.5711	23.9544	23.9148	23.9151	24.8121	25.3868	25.0251	25.2111	24.5177	25.082	25.1911	23.4331	23.3217	26.0632	25.3125	25.0358	25.2437	25.2012	24.0737	biological regulation;cellular process;cellular response to stimulus;intracellular signal transduction;positive regulation of biological process;positive regulation of catalytic activity;positive regulation of cell communication;positive regulation of cellular process;positive regulation of GTPase activity;positive regulation of hydrolase activity;positive regulation of molecular function;positiv…	binding;binding, bridging;enzyme activator activity;enzyme regulator activity;GTPase activator activity;GTPase regulator activity;nucleoside-triphosphatase regulator activity;protein binding;protein binding, bridging;SH3/SH2 adaptor activity;signaling adaptor activity	cell part;cell projection;cytoplasm;cytoplasmic part;cytosol;extracellular membrane-bounded organelle;extracellular organelle;extracellular region part;extracellular vesicular exosome;intracellular part;membrane;membrane-bounded organelle;membrane-bounded vesicle;organelle;plasma membrane;ruffle;vesicle		ACCAATC,MIR-509;ACTGCCT,MIR-34B;BENPORATH_NANOG_TARGETS;BENPORATH_SOX2_TARGETS;BIOCARTA_RHO_PATHWAY;BLALOCK_ALZHEIMERS_DISEASE_UP;BROWNE_HCMV_INFECTION_18HR_DN;CACTGCC,MIR-34A,MIR-34C,MIR-449;CHANDRAN_METASTASIS_UP;CHICAS_RB1_TARGETS_CONFLUENT;chr11p11;DAVIES_MULTIPLE_MYELOMA_VS_MGUS_DN;FLECHNER_PBL_KIDNEY_TRANSPLANT_OK_VS_DONOR_UP;FORTSCHEGGER_PHF8_TARGETS_DN;GCACTTT,MIR-17-5P,MIR-20A,MIR-106A,M…	---	3D-structure;Acetylation;Completeproteome;Cytoplasm;Directproteinsequencing;GTPaseactivation;Phosphoprotein;Polymorphism;Referenceproteome;SH3-binding	+			Control vs CFNT		Rho GTPase-activating protein 1	ARHGAP1	Q07960	Q07960	RHG01_HUMAN	11	1410700000	205	0.00425549	0.0392187	1.09595
26.2469	26.3531	25.6669	25.8548	26.1599	26.0439	26.1265	26.8088	25.7989	24.2357	24.2292	25.6518	25.7209	25.5364	25.5449	24.8478	24.6162	25.2946	25.5831	23.6537	25.5107	25.8715	25.6228	25.0536	26.254	25.305	24.8457	anatomical structure development;biological regulation;cell chemotaxis;cell differentiation;cell migration;cell motility;cellular component movement;cellular component organization;cellular component organization at cellular level;cellular component organization or biogenesis;cellular component organization or biogenesis at cellular level;cellular developmental process;cellular macromolecule meta…	binding;carbohydrate binding;chemoattractant activity;extracellular matrix binding;IgE binding;immunoglobulin binding;laminin binding;protein binding;protein complex binding	cell part;cytoplasm;cytoplasmic part;external side of plasma membrane;extracellular matrix;extracellular membrane-bounded organelle;extracellular organelle;extracellular region part;extracellular space;extracellular vesicular exosome;immunological synapse;intracellular membrane-bounded organelle;intracellular organelle;intracellular organelle part;intracellular part;macromolecular complex;membran…		ACEVEDO_FGFR1_TARGETS_IN_PROSTATE_CANCER_MODEL_UP;ACEVEDO_LIVER_CANCER_WITH_H3K27ME3_DN;AKL_HTLV1_INFECTION_UP;BAE_BRCA1_TARGETS_UP;BENPORATH_EED_TARGETS;BENPORATH_ES_WITH_H3K27ME3;BENPORATH_PRC2_TARGETS;BENPORATH_SUZ12_TARGETS;BROWNE_HCMV_INFECTION_24HR_DN;BRUINS_UVC_RESPONSE_VIA_TP53_GROUP_D;BUYTAERT_PHOTODYNAMIC_THERAPY_STRESS_UP;CAAGGAT,MIR-362;CAHOY_ASTROGLIAL;CARBOHYDRATE_BINDING;CCAGGGG,MI…	---	3D-structure;Acetylation;Completeproteome;Cytoplasm;Differentiation;Disulfidebond;IgE-bindingprotein;Immunity;Innateimmunity;Lectin;mRNAprocessing;mRNAsplicing;Nucleus;Phosphoprotein;Polymorphism;Referenceproteome;Repeat;Secreted;Spliceosome	+			Control vs CFNT		Galectin-3	LGALS3	P17931	P17931	LEG3_HUMAN	7	2038700000	225	0.000849922	0.0222154	1.09817
25.2811	25.2976	25.7595	25.9664	25.5142	25.5871	25.6243	26.0064	23.091	23.9451	23.5006	23.4898	25.1181	26.0019	25.043	24.4639	24.4943	25.3287	24.8946	24.3104	22.0618	17.3225	24.8157	25.0915	25.376	25.9228	24.5176	biological regulation;cAMP catabolic process;cAMP metabolic process;catabolic process;cellular catabolic process;cellular metabolic process;cellular nitrogen compound catabolic process;cellular nitrogen compound metabolic process;cellular process;cellular response to stimulus;cyclic nucleotide catabolic process;cyclic nucleotide metabolic process;heterocycle catabolic process;heterocycle metaboli…	3',5'-cyclic-AMP phosphodiesterase activity;3',5'-cyclic-nucleotide phosphodiesterase activity;binding;catalytic activity;cation binding;cyclic-nucleotide phosphodiesterase activity;hydrolase activity;hydrolase activity, acting on ester bonds;ion binding;metal ion binding;molecular transducer activity;phosphoric diester hydrolase activity;phosphoric ester hydrolase activity;signal transducer acti…	cell part;cytoplasmic part;cytosol;extracellular membrane-bounded organelle;extracellular organelle;extracellular region part;extracellular vesicular exosome;intracellular part;membrane-bounded organelle;membrane-bounded vesicle;organelle;vesicle	Purine metabolism	ASTON_MAJOR_DEPRESSIVE_DISORDER_DN;BENPORATH_EED_TARGETS;BENPORATH_ES_WITH_H3K27ME3;BILD_E2F3_ONCOGENIC_SIGNATURE;BONOME_OVARIAN_CANCER_POOR_SURVIVAL_UP;BONOME_OVARIAN_CANCER_SURVIVAL_SUBOPTIMAL_DEBULKING;CAGGTG_V$E12_Q6;CAIRO_LIVER_DEVELOPMENT_DN;chr15q25;CREIGHTON_ENDOCRINE_THERAPY_RESISTANCE_5;CRX_NRL_DN.V1_UP;CTTTAAR_UNKNOWN;DACOSTA_UV_RESPONSE_VIA_ERCC3_COMMON_DN;DACOSTA_UV_RESPONSE_VIA_ERCC…	---	3D-structure;Alternativesplicing;cAMP;Completeproteome;Hydrolase;Metal-binding;Phosphoprotein;Polymorphism;Referenceproteome	+			Control vs CFNT		High affinity cAMP-specific and IBMX-insensitive 3,5-cyclic phosphodiesterase 8A	PDE8A	O60658	O60658	PDE8A_HUMAN	17	1513600000	186	0.00180354	0.0253793	1.15612
27.163	27.2077	28.0141	27.822	28.2189	27.632	27.3806	28.002	25.5002	25.8723	25.6592	25.7949	26.5127	28.1088	26.8831	27.1063	26.696	27.6886	26.1209	25.991	25.4674	23.5241	27.3546	26.8311	27.1364	27.2204	26.9512	biological regulation;biosynthetic process;carbon catabolite regulation of transcription;carbon catabolite repression of transcription;cell communication;cell cycle process;cell division;cellular biosynthetic process;cellular component organization;cellular component organization at cellular level;cellular component organization or biogenesis;cellular component organization or biogenesis at cellu…	binding;catalytic activity;cation binding;hydrolase activity;identical protein binding;ion binding;metal ion binding;metallopeptidase activity;peptidase activity;peptidase activity, acting on L-amino acid peptides;protein binding;protein dimerization activity;protein domain specific binding;protein homodimerization activity;transition metal ion binding;zinc ion binding	cell part;chromosome;condensed chromosome;condensed nuclear chromosome;cytoplasmic part;cytoskeletal part;early endosome;endomembrane system;endosomal part;endosome;ESCRT III complex;extracellular membrane-bounded organelle;extracellular organelle;extracellular region part;extracellular vesicular exosome;intracellular membrane-bounded organelle;intracellular non-membrane-bounded organelle;intrace…		BIOPOLYMER_METABOLIC_PROCESS;BLALOCK_ALZHEIMERS_DISEASE_UP;BRUINS_UVC_RESPONSE_VIA_TP53_GROUP_B;CATION_BINDING;CELL_CYCLE_GO_0007049;CELL_CYCLE_PHASE;CELL_CYCLE_PROCESS;CELLULAR_RESPONSE_TO_EXTRACELLULAR_STIMULUS;CELLULAR_RESPONSE_TO_NUTRIENT_LEVELS;CELLULAR_RESPONSE_TO_STIMULUS;chr16q24;CHROMOSOME;CHROMOSOME_CONDENSATION;CHROMOSOME_ORGANIZATION_AND_BIOGENESIS;CHROMOSOME_SEGREGATION;CONDENSED_CHR…	---	3D-structure;Acetylation;Alternativesplicing;Cellcycle;Celldivision;Coiledcoil;Completeproteome;Cytoplasm;Endosome;Membrane;Nucleus;Phosphoprotein;Proteintransport;Referenceproteome;Repressor;Transcription;Transcriptionregulation;Transport	+			Control vs CFNT		Charged multivesicular body protein 1a	CHMP1A	Q9HD42	Q9HD42	CHM1A_HUMAN	6	6334500000	316	0.0014851	0.0229231	1.18554
27.151	27.2449	27.4874	27.5695	28.5856	28.0177	27.1113	28.0154	26.6037	26.7045	26.3659	26.3263	27.3283	26.5008	25.7228	26.0804	26.6126	26.439	27.4194	25.3108	27.7112	25.381	26.4712	27.8013	26.5401	26.9622	27.3729	amine metabolic process;anatomical structure development;benzene-containing compound metabolic process;carboxylic acid metabolic process;catabolic process;cell development;cellular amine metabolic process;cellular amino acid metabolic process;cellular aromatic compound metabolic process;cellular catabolic process;cellular detoxification of nitrogen compound;cellular developmental process;cellular…	amine binding;amino acid binding;binding;carboxylic acid binding;catalytic activity;enzyme binding;glutathione binding;glutathione transferase activity;identical protein binding;modified amino acid binding;peptide binding;protein binding;protein dimerization activity;protein homodimerization activity;transferase activity;transferase activity, transferring alkyl or aryl (other than methyl) groups	cell part;cell projection part;cytoplasm;cytoplasmic part;cytosol;extracellular membrane-bounded organelle;extracellular organelle;extracellular region part;extracellular vesicular exosome;flagellar fibrous sheath;flagellum part;intracellular membrane-bounded organelle;intracellular organelle;intracellular organelle part;intracellular part;membrane-bounded organelle;membrane-bounded vesicle;micro…	Drug metabolism - cytochrome P450;Glutathione metabolism;Metabolism of xenobiotics by cytochrome P450	ALCALAY_AML_BY_NPM1_LOCALIZATION_UP;ANATOMICAL_STRUCTURE_DEVELOPMENT;ASTON_MAJOR_DEPRESSIVE_DISORDER_UP;BARIS_THYROID_CANCER_UP;BASAKI_YBX1_TARGETS_DN;BENPORATH_SUZ12_TARGETS;BERENJENO_TRANSFORMED_BY_RHOA_DN;BLALOCK_ALZHEIMERS_DISEASE_DN;BOQUEST_STEM_CELL_UP;BROWN_MYELOID_CELL_DEVELOPMENT_UP;BROWNE_HCMV_INFECTION_20HR_UP;BYSTRYKH_HEMATOPOIESIS_STEM_CELL_QTL_TRANS;CELL_DEVELOPMENT;chr1p13;CHYLA_CB…	---	3D-structure;Completeproteome;Cytoplasm;Directproteinsequencing;Polymorphism;Referenceproteome;Transferase	+			Control vs CFNT		Glutathione S-transferase Mu 3	GSTM3	P21266	P21266	GSTM3_HUMAN	11	5678600000	389	0.000194316	0.0126897	1.19664
25.5828	25.4668	25.794	26.0877	26.533	26.1742	25.8849	26.2569	24.133	24.0223	24.5958	23.8353	25.1994	26.0888	25.0277	24.7311	24.5583	25.8957	24.9916	24.001	23.4302	19.2844	25.3094	24.7463	25.1378	26.7807	25.4896	anatomical structure morphogenesis;axonogenesis;biological regulation;cell part morphogenesis;cell projection morphogenesis;cell projection organization;cellular component assembly;cellular component morphogenesis;cellular component organization;cellular component organization at cellular level;cellular component organization or biogenesis;cellular component organization or biogenesis at cellular…	adenyl nucleotide binding;adenyl ribonucleotide binding;alpha-tubulin binding;ATP binding;ATPase activity;ATPase activity, coupled;beta-tubulin binding;binding;catalytic activity;cytoskeletal protein binding;hydrolase activity;hydrolase activity, acting on acid anhydrides;hydrolase activity, acting on acid anhydrides, in phosphorus-containing anhydrides;microtubule binding;microtubule-severing AT…	cell part;centrosome;cytoplasm;cytoplasmic part;cytoplasmic vesicle;cytoskeletal part;endoplasmic reticulum;endosome;extracellular membrane-bounded organelle;extracellular organelle;extracellular region part;extracellular vesicular exosome;integral to membrane;intracellular membrane-bounded organelle;intracellular non-membrane-bounded organelle;intracellular organelle;intracellular organelle part…		ATTCTTT,MIR-186;BROWNE_HCMV_INFECTION_18HR_UP;BRUINS_UVC_RESPONSE_LATE;BYSTRYKH_HEMATOPOIESIS_STEM_CELL_QTL_CIS;chr2p24;CTACTGT,MIR-199A;DACOSTA_UV_RESPONSE_VIA_ERCC3_DN;DANG_BOUND_BY_MYC;GAZDA_DIAMOND_BLACKFAN_ANEMIA_PROGENITOR_DN;GCM_DFFA;GCM_MYST2;GCM_NCAM1;GCM_PPM1D;GCM_RAN;GCM_SUFU;GCM_UBE2N;GCM_ZNF198;GGGCGGR_V$SP1_Q6;GROSS_HYPOXIA_VIA_ELK3_AND_HIF1A_UP;GROSS_HYPOXIA_VIA_ELK3_UP;GSE10239_NA…	---	3D-structure;Allostericenzyme;Alternativeinitiation;Alternativepromoterusage;Alternativesplicing;ATP-binding;Cellcycle;Celldivision;Completeproteome;Cytoplasm;Cytoskeleton;Developmentalprotein;Differentiation;Endoplasmicreticulum;Endosome;Hereditaryspasticparaplegia;Hydrolase;Membrane;Microtubule;Neurodegeneration;Neurogenesis;Nucleotide-binding;Nucleus;Phosphoprotein;Polymorphism;Referenceproteo…	+			Control vs CFNT		Spastin	SPAST	Q9UBP0	Q9UBP0	SPAST_HUMAN	17	1935300000	292	0.000374109	0.0157714	1.21587
31.6882	31.7059	32.1997	32.0647	31.789	32.1919	31.9164	32.542	29.9906	29.4249	30.6598	30.0596	31.1862	32.1904	31.3246	31.3049	30.9379	32.0039	30.6474	29.7462	29.9228	28.1779	31.6334	30.7814	31.4004	31.9382	31.3372	abscission;biological regulation;cell division;cellular process;cytokinesis;developmental process;establishment of localization;establishment of protein localization;localization;macromolecule localization;positive regulation of axonogenesis;positive regulation of biological process;positive regulation of cell development;positive regulation of cell differentiation;positive regulation of cell gro…	binding;protein binding;protein complex binding;protein domain specific binding	cell part;centrosome;cytoplasmic membrane-bounded vesicle;cytoplasmic part;cytoplasmic vesicle;cytoskeletal part;cytosol;endoplasmic reticulum-Golgi intermediate compartment;extracellular membrane-bounded organelle;extracellular organelle;extracellular region part;extracellular vesicular exosome;intracellular membrane-bounded organelle;intracellular non-membrane-bounded organelle;intracellular or…		BENPORATH_OCT4_TARGETS;BUYTAERT_PHOTODYNAMIC_THERAPY_STRESS_UP;CAMP_UP.V1_UP;chr16q22;CTCAGGG,MIR-125B,MIR-125A;CYTOPLASM;CYTOPLASMIC_PART;DAZARD_RESPONSE_TO_UV_SCC_DN;ER_GOLGI_INTERMEDIATE_COMPARTMENT;GAL_LEUKEMIC_STEM_CELL_DN;GATTGGY_V$NFY_Q6_01;GCCATNTTG_V$YY1_Q6;GENTILE_UV_RESPONSE_CLUSTER_D9;GGGYGTGNY_UNKNOWN;GSE11864_UNTREATED_VS_CSF1_IFNG_PAM3CYS_IN_MAC_DN;GSE14308_NAIVE_CD4_TCELL_VS_INDUC…	---	3D-structure;Alternativesplicing;Cellcycle;Celldivision;Completeproteome;Cytoplasmicvesicle;Phosphoprotein;Referenceproteome	+			Control vs CFNT		IST1 homolog	IST1	P53990	P53990	IST1_HUMAN	21	121070000000	2418	0.00130728	0.0224348	1.22253
29.1222	29.0424	29.2805	29.4283	29.5731	29.9982	29.4882	29.7469	28.1069	27.7125	27.4394	27.5495	28.0518	29.6175	28.4515	28.5013	28.5056	28.9893	28.2344	27.2664	26.8783	22.9739	28.7271	28.0261	29.0004	29.1605	28.8471	biological regulation;cell cycle process;cellular component organization;cellular component organization at cellular level;cellular component organization or biogenesis;cellular component organization or biogenesis at cellular level;cellular process;cytokinetic cell separation;cytokinetic process;endosome to lysosome transport;endosome transport;establishment of chromosome localization;establishm…		cell part;cytoplasmic part;cytosol;endosomal part;endosome membrane;extracellular membrane-bounded organelle;extracellular organelle;extracellular region part;extracellular vesicular exosome;intracellular membrane-bounded organelle;intracellular organelle;intracellular organelle part;intracellular part;membrane;membrane-bounded organelle;membrane-bounded vesicle;nucleus;organelle;organelle membra…	Endocytosis	ACEVEDO_LIVER_CANCER_UP;ACEVEDO_LIVER_TUMOR_VS_NORMAL_ADJACENT_TISSUE_UP;ATCATGA,MIR-433;BOCHKIS_FOXA2_TARGETS;chr9p13;GAUSSMANN_MLL_AF4_FUSION_TARGETS_C_UP;GSE10239_KLRG1INT_VS_KLRG1HIGH_EFF_CD8_TCELL_DN;GSE10239_MEMORY_VS_KLRG1INT_EFF_CD8_TCELL_DN;GSE13484_12H_UNSTIM_VS_YF17D_VACCINE_STIM_PBMC_DN;GSE13484_UNSTIM_VS_YF17D_VACCINE_STIM_PBMC_DN;GSE13485_CTRL_VS_DAY7_YF17D_VACCINE_PBMC_DN;GSE13485_…	REACTOME_ENDOSOMAL_SORTING_COMP_Yes	3D-structure;Alternativesplicing;Coiledcoil;Completeproteome;Cytoplasm;Endosome;Membrane;Phosphoprotein;Polymorphism;Proteintransport;Referenceproteome;Transport;Ublconjugation	+			Control vs CFNT		Charged multivesicular body protein 5	CHMP5	Q9NZZ3	Q9NZZ3	CHMP5_HUMAN	7	21116000000	936	0.000119334	0.0109474	1.2578
21.0145	20.8054	20.7719	20.7677	22.2037	20.546	20.8712	21.1775	19.1708	18.6509	19.4959	20.0306	19.098	20.8889	20.9977	19.344	18.8954	20.9199	19.8502	19.7591	21.0639	20.6924	18.3113	17.9838	20.2295	21.1805	19.3876	actin cytoskeleton organization;actin filament-based process;ameboidal cell migration;anatomical structure development;anatomical structure formation involved in morphogenesis;anatomical structure morphogenesis;biological regulation;cell migration;cell motility;cellular component movement;cellular component organization;cellular component organization at cellular level;cellular component organiza…	actin binding;binding;cytoskeletal protein binding;enzyme activator activity;enzyme binding;enzyme regulator activity;phosphatase activator activity;phosphatase binding;phosphatase regulator activity;protein binding;protein phosphatase 1 binding;protein phosphatase activator activity;protein phosphatase binding;protein phosphatase regulator activity;protein phosphatase type 1 activator activity;p…	cell part;cell projection;cytoplasm;intracellular part;lamellipodium		ACEVEDO_LIVER_TUMOR_VS_NORMAL_ADJACENT_TISSUE_UP;BILD_HRAS_ONCOGENIC_SIGNATURE;BROWNE_HCMV_INFECTION_12HR_UP;chr1p35;GCM_HBP1;GCM_MYST2;GINESTIER_BREAST_CANCER_20Q13_AMPLIFICATION_DN;GSE10856_CTRL_VS_TNFRSF6B_IN_MACROPHAGE_UP;GSE14308_TH1_VS_INDUCED_TREG_DN;GSE14308_TH17_VS_INDUCED_TREG_DN;GSE14308_TH2_VS_INDUCED_TREG_DN;GSE18791_CTRL_VS_NEWCASTLE_VIRUS_DC_10H_DN;GSE18791_CTRL_VS_NEWCASTLE_VIRUS_…	---	Actin-binding;Alternativesplicing;Cellprojection;Completeproteome;Cytoplasm;Developmentalprotein;Neurogenesis;Phosphoprotein;Referenceproteome;Repeat	+			Control vs CFNT		Phosphatase and actin regulator 4	PHACTR4	Q8IZ21	Q8IZ21	PHAR4_HUMAN	4	43618000	8	0.00107285	0.0218947	1.2613
22.6341	22.5933	24.4346	22.6406	22.6155	23.111	22.996	23.674	21.6974	21.9503	20.4395	19.8567	22.5938	22.8842	22.4326	21.8615	20.5489	22.8711	22.8577	21.7243	18.7444	19.4992	22.1307	22.2652	23.3962	22.8487	20.609	associative learning;behavior;behavioral defense response;behavioral fear response;biological regulation;cAMP catabolic process;cAMP metabolic process;catabolic process;cellular catabolic process;cellular metabolic process;cellular nitrogen compound catabolic process;cellular nitrogen compound metabolic process;cellular process;cellular response to stimulus;cognition;cyclic nucleotide catabolic p…	3',5'-cyclic-AMP phosphodiesterase activity;3',5'-cyclic-nucleotide phosphodiesterase activity;binding;catalytic activity;cation binding;cyclic-nucleotide phosphodiesterase activity;hydrolase activity;hydrolase activity, acting on ester bonds;ion binding;metal ion binding;molecular transducer activity;phosphoric diester hydrolase activity;phosphoric ester hydrolase activity;signal transducer acti…	cell part;cytoplasmic part;cytosol;intracellular part	Purine metabolism	AAGCCAT,MIR-135A,MIR-135B;ACEVEDO_FGFR1_TARGETS_IN_PROSTATE_CANCER_MODEL_DN;BENPORATH_ES_WITH_H3K27ME3;BENPORATH_SUZ12_TARGETS;BHATI_G2M_ARREST_BY_2METHOXYESTRADIOL_DN;BROWNE_HCMV_INFECTION_48HR_UP;chr5q12;chr5q13;GCM_AQP4;GSE14769_40MIN_VS_360MIN_LPS_BMDM_UP;GSE14769_UNSTIM_VS_360MIN_LPS_BMDM_UP;GSE22886_IGG_IGA_MEMORY_BCELL_VS_BLOOD_PLASMA_CELL_UP;GSE22886_IGG_IGA_MEMORY_BCELL_VS_BM_PLASMA_CELL…	---	Alternativesplicing;cAMP;Completeproteome;Cushingsyndrome;Diseasemutation;Hydrolase;Metal-binding;Phosphoprotein;Referenceproteome	+			Control vs CFNT		High affinity cAMP-specific and IBMX-insensitive 3,5-cyclic phosphodiesterase 8B	PDE8B	O95263	O95263	PDE8B_HUMAN	5	255680000	35	0.00628221	0.0414962	1.27756
30.1409	30.2127	31.1405	30.7661	30.6061	30.5555	30.2666	30.8815	28.8845	28.4658	28.9826	28.488	29.5249	30.7037	29.5726	29.4595	29.5643	30.0679	28.7562	28.9797	28.5796	26.489	30.1477	29.6168	30.0105	30.5353	29.3001	biological regulation;cell cycle process;cell division;cellular component organization;cellular component organization at cellular level;cellular component organization or biogenesis;cellular component organization or biogenesis at cellular level;cellular process;cytokinetic cell separation;cytokinetic process;establishment of chromosome localization;establishment of localization;establishment of…	binding;protein binding;protein domain specific binding	cell part;cytoplasmic part;cytosol;endosomal part;endosome membrane;ESCRT III complex;extracellular membrane-bounded organelle;extracellular organelle;extracellular region part;extracellular vesicular exosome;intracellular organelle part;intracellular part;late endosome membrane;macromolecular complex;membrane;membrane coat;membrane part;membrane-bounded organelle;membrane-bounded vesicle;organel…	Endocytosis	ACEVEDO_LIVER_CANCER_UP;ACEVEDO_LIVER_TUMOR_VS_NORMAL_ADJACENT_TISSUE_UP;BRUINS_UVC_RESPONSE_VIA_TP53_GROUP_B;CHARAFE_BREAST_CANCER_LUMINAL_VS_BASAL_DN;chr18p11;CTTTGT_V$LEF1_Q2;CUI_TCF21_TARGETS_2_DN;FORTSCHEGGER_PHF8_TARGETS_DN;GAZDA_DIAMOND_BLACKFAN_ANEMIA_PROGENITOR_UP;GOBERT_OLIGODENDROCYTE_DIFFERENTIATION_DN;GRAESSMANN_APOPTOSIS_BY_DOXORUBICIN_UP;GSE11864_UNTREATED_VS_CSF1_IFNG_IN_MAC_UP;GS…	---	3D-structure;Cellcycle;Celldivision;Coiledcoil;Completeproteome;Cytoplasm;Endosome;Membrane;Proteintransport;Referenceproteome;Transport	+			Control vs CFNT		Charged multivesicular body protein 1b	CHMP1B	Q7LBR1	Q7LBR1	CHM1B_HUMAN	5	41466000000	642	9.0736e-05	0.0105	1.28376
27.8453	27.4176	27.5277	26.7608	27.9307	27.975	27.7772	27.8349	25.6491	25.1121	28.0519	26.2997	26.8789	27.2397	26.9537	26.1008	25.9621	27.3359	26.1297	24.4194	24.4041	21.4726	27.9388	27.4225	26.6979	26.046	27.0231	anatomical structure development;anatomical structure formation involved in morphogenesis;behavior;biological regulation;calcium ion homeostasis;cation homeostasis;cellular calcium ion homeostasis;cellular cation homeostasis;cellular chemical homeostasis;cellular divalent inorganic cation homeostasis;cellular homeostasis;cellular ion homeostasis;cellular metal ion homeostasis;cellular process;cel…	binding;calcium ion binding;cation binding;ion binding;lipid binding;metal ion binding;steroid binding;transition metal ion binding;vitamin binding;vitamin D binding;zinc ion binding	axon;cell body;cell junction;cell part;cell projection;cell-cell junction;cytoplasm;cytoplasmic part;cytosol;dendrite;extracellular membrane-bounded organelle;extracellular organelle;extracellular region part;extracellular vesicular exosome;gap junction;intracellular membrane-bounded organelle;intracellular organelle;intracellular part;membrane-bounded organelle;membrane-bounded vesicle;neuron pr…	Endocrine and other factor-regulated calcium reabsorption	AACTTT_UNKNOWN;ACCAAAG,MIR-9;ACOSTA_PROLIFERATION_INDEPENDENT_MYC_TARGETS_DN;ATTCTTT,MIR-186;AZARE_NEOPLASTIC_TRANSFORMATION_BY_STAT3_DN;BANDRES_RESPONSE_TO_CARMUSTIN_MGMT_48HR_DN;BENPORATH_NANOG_TARGETS;CAGGTG_V$E12_Q6;CAGNWMCNNNGAC_UNKNOWN;CAHOY_NEURONAL;CALCIUM_ION_BINDING;CATION_BINDING;chr16q22;chr8p11;CREIGHTON_ENDOCRINE_THERAPY_RESISTANCE_4;DEMAGALHAES_AGING_DN;DORSAM_HOXA9_TARGETS_UP;EGFR…	---	Acetylation;Alternativesplicing;Calcium;Completeproteome;Metal-binding;Referenceproteome;Repeat;VitaminD	+			Control vs CFNT		Calbindin	CALB1	P05937;P22676	P05937	CALB1_HUMAN	14	5764400000	541	0.00321671	0.0298557	1.28923
25.3233	25.2514	25.6056	25.5824	25.0786	25.2221	25.697	23.3806	22.2174	24.8169	22.4471	22.9722	23.3834	24.1719	24.67	24.4517	25.2187	24.515	22.9613	23.7906	23.8484	18.3935	23.2671	24.5245	25.1572	24.3514	24.5668	anatomical structure development;anatomical structure formation involved in morphogenesis;biological adhesion;biological regulation;calcium ion homeostasis;cation homeostasis;cell adhesion;cell projection assembly;cell projection organization;cell-cell adhesion;cellular calcium ion homeostasis;cellular cation homeostasis;cellular chemical homeostasis;cellular component assembly;cellular component…	receptor activity	anchored to external side of plasma membrane;anchored to membrane;anchored to plasma membrane;apical plasma membrane;cell part;cell projection;centrosome;cilium;cytoplasm;cytoplasmic part;cytoskeletal part;extracellular membrane-bounded organelle;extracellular organelle;extracellular region part;extracellular vesicular exosome;integral to membrane;intracellular non-membrane-bounded organelle;intr…		AACTTT_UNKNOWN;ACEVEDO_LIVER_CANCER_WITH_H3K9ME3_UP;ANCHORED_TO_MEMBRANE;ANCHORED_TO_PLASMA_MEMBRANE;APICAL_PART_OF_CELL;APICAL_PLASMA_MEMBRANE;CAGGTA_V$AREB6_01;CELL_CELL_ADHESION;CELL_PROJECTION;CELL_PROJECTION_PART;CELL_SURFACE;CERVERA_SDHB_TARGETS_2;CHEMNITZ_RESPONSE_TO_PROSTAGLANDIN_E2_DN;chr6p21;CYTOPLASM;CYTOPLASMIC_PART;CYTOSKELETON;DARWICHE_PAPILLOMA_RISK_HIGH_DN;DARWICHE_PAPILLOMA_RISK_…	---	Alternativesplicing;Cellprojection;Ciliopathy;Cilium;Completeproteome;Cytoplasm;Cytoskeleton;Diseasemutation;Glycoprotein;Membrane;Polymorphism;Receptor;Referenceproteome;Repeat;Signal;Transmembrane;Transmembranehelix	+			Control vs CFNT		Fibrocystin	PKHD1	P08F94	P08F94	PKHD1_HUMAN	23	856150000	130	0.00437451	0.0332336	1.34127
29.6716	30.699	29.0954	29.9038	29.6704	29.8755	30.204	29.0967	28.9638	27.398	28.726	27.2898	26.3465	27.2165	29.2752	30.5346	28.3432	29.4683	29.4632	28.0916	27.8214	26.2123	28.5363	30.3629	29.2537	29.4729	29.1332	amine metabolic process;cation transport;cell communication;cellular process;cellular response to amine stimulus;cellular response to chemical stimulus;cellular response to copper ion;cellular response to copper ion starvation;cellular response to endogenous stimulus;cellular response to external stimulus;cellular response to extracellular stimulus;cellular response to heparin;cellular response t…	binding;calcium ion binding;carbohydrate binding;catalytic activity;cation binding;cation channel activity;cation transmembrane transporter activity;channel activity;cofactor binding;copper ion binding;diamine oxidase activity;drug binding;glycosaminoglycan binding;heparin binding;histamine oxidase activity;identical protein binding;ion binding;ion channel activity;ion transmembrane transporter a…	cell junction;cell part;cell-cell junction;cytoplasmic part;extracellular membrane-bounded organelle;extracellular organelle;extracellular region part;extracellular space;extracellular vesicular exosome;intracellular membrane-bounded organelle;intracellular organelle;intracellular part;membrane;membrane-bounded organelle;membrane-bounded vesicle;microbody;occluding junction;organelle;peroxisome;p…	Arginine and proline metabolism;Histidine metabolism;Tryptophan metabolism		---	3D-structure;Alternativesplicing;Calcium;Completeproteome;Copper;Directproteinsequencing;Disulfidebond;Glycoprotein;Heparin-binding;Metal-binding;Oxidoreductase;Polymorphism;Referenceproteome;Secreted;Signal;TPQ	+			Control vs CFNT		Amiloride-sensitive amine oxidase [copper-containing]	AOC1	P19801	P19801		34	25936000000	1680	0.00835423	0.0471014	1.35066
24.3681	23.6976	23.8269	23.8014	25.2825	23.9483	23.7513	25.1593	23.1559	23.1691	23.499	23.3688	24.0241	23.1478	23.1969	22.1986	19.927	23.5032	23.5246	21.7831	23.1732	24.0288	23.5104	23.018	23.1419	24.0962	19.0567	cell differentiation;cellular developmental process;cellular process;developmental process;epithelial cell differentiation		extracellular membrane-bounded organelle;extracellular organelle;extracellular region part;extracellular vesicular exosome;membrane-bounded organelle;membrane-bounded vesicle;organelle;vesicle		AACTGGA,MIR-145;ACATTCC,MIR-1,MIR-206;ACEVEDO_LIVER_CANCER_UP;ACEVEDO_LIVER_TUMOR_VS_NORMAL_ADJACENT_TISSUE_UP;BENPORATH_MYC_MAX_TARGETS;BERENJENO_TRANSFORMED_BY_RHOA_UP;BOHN_PRIMARY_IMMUNODEFICIENCY_SYNDROM_UP;BONOME_OVARIAN_CANCER_SURVIVAL_OPTIMAL_DEBULKING;BURTON_ADIPOGENESIS_7;CACGTG_V$MYC_Q2;CAGGTG_V$E12_Q6;CHEN_METABOLIC_SYNDROM_NETWORK;chr1q21;CRX_DN.V1_DN;CTTTAAR_UNKNOWN;DANG_BOUND_BY_MYC…	---	3D-structure;Acetylation;Alternativesplicing;Completeproteome;Directproteinsequencing;Phosphoprotein;Polymorphism;Referenceproteome	+			Control vs CFNT		Transgelin-2	TAGLN2	P37802	P37802	TAGL2_HUMAN	7	514120000	50	0.0060352	0.03856	1.35458
28.8447	28.6208	29.5753	29.4959	29.3425	29.3014	28.9355	29.6662	26.5763	26.6439	27.7965	27.1633	28.1982	29.7673	27.974	28.564	28.5507	28.903	27.6606	26.4726	26.2618	23.6817	28.748	28.0657	28.4906	28.938	28.1713	biological regulation;cell cycle process;cellular component assembly;cellular component organization;cellular component organization at cellular level;cellular component organization or biogenesis;cellular component organization or biogenesis at cellular level;cellular process;cytokinetic cell separation;cytokinetic process;endosome transport;establishment of chromosome localization;establishment…	binding;identical protein binding;protein binding;protein dimerization activity;protein homodimerization activity	cell part;cytoplasm;cytoplasmic part;cytosol;endosomal part;endosome;endosome membrane;ESCRT III complex;extracellular membrane-bounded organelle;extracellular organelle;extracellular region part;extracellular vesicular exosome;internal side of plasma membrane;intracellular membrane-bounded organelle;intracellular organelle;intracellular organelle part;intracellular part;late endosome membrane;ma…	Endocytosis	AAGCCAT,MIR-135A,MIR-135B;CCTGCTG,MIR-214;CHANDRAN_METASTASIS_TOP50_DN;chr20p12;chr20q11;DAIRKEE_TERT_TARGETS_UP;GCM_CSNK1D;GSE10239_MEMORY_VS_KLRG1HIGH_EFF_CD8_TCELL_DN;GSE10239_MEMORY_VS_KLRG1INT_EFF_CD8_TCELL_DN;GSE14308_TH17_VS_INDUCED_TREG_DN;GSE17721_0.5H_VS_24H_CPG_BMDM_UP;GSE17721_0.5H_VS_8H_CPG_BMDM_DN;GSE17721_12H_VS_24H_CPG_BMDM_UP;GSE17721_12H_VS_24H_LPS_BMDM_UP;GSE17721_CPG_VS_GARDIQ…	REACTOME_ENDOSOMAL_SORTING_COMP_Yes	3D-structure;Acetylation;Cataract;Coiledcoil;Completeproteome;Cytoplasm;Directproteinsequencing;Diseasemutation;Endosome;Membrane;Phosphoprotein;Proteintransport;Referenceproteome;Transport;Ublconjugation	+			Control vs CFNT		Charged multivesicular body protein 4b	CHMP4B	Q9H444;P59074	Q9H444	CHM4B_HUMAN	10	15200000000	472	0.00201688	0.0225455	1.36692
27.8687	27.5485	27.9349	28.4898	28.1855	28.3928	28.0044	28.6148	24.7814	25.7986	26.6108	26.2601	27.5867	28.377	27.044	27.144	26.3823	27.6581	26.5693	25.5553	25.3772	23.0436	27.6342	26.4735	27.7098	27.8198	27.3656	biological regulation;cell cycle cytokinesis;cell cycle process;cellular process;cytokinesis;cytokinesis after mitosis;cytokinetic cell separation;cytokinetic process;establishment of localization;negative regulation of binding;negative regulation of molecular function;negative regulation of protein binding;regulation of binding;regulation of molecular function;regulation of protein binding;trans…	binding;identical protein binding;lipid binding;phosphatidylinositol binding;phospholipid binding;protein binding;protein dimerization activity;protein domain specific binding;protein homodimerization activity	cell part;cytoplasmic part;endosomal part;endosome membrane;extracellular membrane-bounded organelle;extracellular organelle;extracellular region part;extracellular vesicular exosome;extrinsic to membrane;intracellular membrane-bounded organelle;intracellular organelle;intracellular organelle part;intracellular part;late endosome membrane;membrane;membrane part;membrane-bounded organelle;membrane…		BRUINS_UVC_RESPONSE_EARLY_LATE;chr2q11;FOSTER_TOLERANT_MACROPHAGE_DN;GSE16522_ANTI_CD3CD28_STIM_VS_UNSTIM_MEMORY_CD8_TCELL_DN;GSE17580_TREG_VS_TEFF_S_MANSONI_INF_DN;GSE17721_0.5H_VS_12H_CPG_BMDM_DN;GSE17721_0.5H_VS_12H_LPS_BMDM_DN;GSE17721_0.5H_VS_12H_POLYIC_BMDM_DN;GSE17721_0.5H_VS_24H_LPS_BMDM_DN;GSE17721_0.5H_VS_4H_CPG_BMDM_DN;GSE17721_CPG_VS_GARDIQUIMOD_4H_BMDM_UP;GSE17721_CTRL_VS_CPG_4H_BMDM…	---	3D-structure;Cellcycle;Celldivision;Completeproteome;Endosome;Membrane;Referenceproteome;Transport	+			Control vs CFNT		MIT domain-containing protein 1	MITD1	Q8WV92	Q8WV92	MITD1_HUMAN	13	8918100000	478	0.000823789	0.0174359	1.48262
25.796	26.4463	24.674	24.8891	25.9103	26.8482	25.5358	25.495	22.8625	25.482	24.4779	24.0433	20.8354	24.6698	24.8502	23.7375	23.4851	24.5979	24.7756	25.6137	23.8411	25.5362	24.8364	25.9705	25.0358	26.4345	24.8188	biological regulation;blood coagulation;blood coagulation, intrinsic pathway;coagulation;hemostasis;macromolecule metabolic process;metabolic process;multicellular organismal process;negative regulation of biological process;negative regulation of blood coagulation;negative regulation of coagulation;negative regulation of multicellular organismal process;plasminogen activation;positive regulation…	aminopeptidase activity;binding;carbohydrate binding;catalytic activity;endopeptidase activity;exopeptidase activity;glycosaminoglycan binding;heparin binding;hydrolase activity;pattern binding;peptidase activity;peptidase activity, acting on L-amino acid peptides;polysaccharide binding;serine hydrolase activity;serine-type aminopeptidase activity;serine-type endopeptidase activity;serine-type ex…	cell part;extracellular membrane-bounded organelle;extracellular organelle;extracellular region;extracellular region part;extracellular space;extracellular vesicular exosome;membrane;membrane-bounded organelle;membrane-bounded vesicle;organelle;plasma membrane;vesicle	Complement and coagulation cascades	ACEVEDO_LIVER_CANCER_WITH_H3K27ME3_UP;AMUNDSON_GAMMA_RADIATION_RESISTANCE;BIOCARTA_INTRINSIC_PATHWAY;BIOCARTA_PLATELETAPP_PATHWAY;CAIRO_HEPATOBLASTOMA_DN;CAIRO_LIVER_DEVELOPMENT_DN;CHEN_METABOLIC_SYNDROM_NETWORK;CHIANG_LIVER_CANCER_SUBCLASS_UNANNOTATED_UP;chr4q35;CTTTGA_V$LEF1_Q2;ENDOPEPTIDASE_ACTIVITY;GRUETZMANN_PANCREATIC_CANCER_DN;GSE17721_CTRL_VS_LPS_2H_BMDM_UP;GSE17721_LPS_VS_PAM3CSK4_2H_BMD…	---	3D-structure;Alternativesplicing;Bloodcoagulation;Completeproteome;Directproteinsequencing;Diseasemutation;Disulfidebond;Glycoprotein;Hemostasis;Heparin-binding;Hydrolase;Polymorphism;Protease;Referenceproteome;Repeat;Secreted;Serineprotease;Signal	+			Control vs CFNT		Coagulation factor XI;Coagulation factor XIa heavy chain;Coagulation factor XIa light chain	F11	P03951	P03951	FA11_HUMAN	13	1772500000	181	0.00608102	0.0345946	1.5801
25.3288	27.2588	26.6413	26.9751	26.614	25.7581	26.2432	26.044	26.5865	25.6258	22.9201	22.8942	24.0806	24.2859	24.015	25.6461	24.1828	25.3302	24.1231	27.1125	23.2113	27.1504	22.776	26.598	25.1915	25.0338	24.9135	actin cytoskeleton organization;actin filament organization;actin filament-based process;actin rod assembly;activation of immune response;activation of innate immune response;biological regulation;catabolic process;cellular catabolic process;cellular component assembly;cellular component assembly at cellular level;cellular component organization;cellular component organization at cellular level;c…	adenyl nucleotide binding;adenyl ribonucleotide binding;ATP binding;binding;calcium ion binding;cation binding;enzyme binding;ion binding;lipoprotein particle receptor binding;low-density lipoprotein particle receptor binding;metal ion binding;nucleic acid binding;nucleotide binding;phosphatase binding;protein binding;protein phosphatase binding;purine nucleotide binding;purine ribonucleoside tri…	adherens junction;anchoring junction;cell junction;cell part;cell-substrate adherens junction;cell-substrate junction;cytoplasmic membrane-bounded vesicle;cytoplasmic membrane-bounded vesicle lumen;cytoplasmic part;cytoplasmic vesicle;cytoplasmic vesicle part;cytosol;endocytic vesicle lumen;endoplasmic reticulum;endoplasmic reticulum lumen;endoplasmic reticulum membrane;endoplasmic reticulum part…	NOD-like receptor signaling pathway;Pathways in cancer;Plant-pathogen interaction;Prostate cancer;Protein processing in endoplasmic reticulum	ANTI_APOPTOSIS;APOPTOSIS_GO;BAELDE_DIABETIC_NEPHROPATHY_DN;BASSO_CD40_SIGNALING_UP;BENPORATH_MYC_MAX_TARGETS;BENPORATH_SOX2_TARGETS;BLUM_RESPONSE_TO_SALIRASIB_UP;CALCIUM_ION_BINDING;CAMP_UP.V1_UP;CATION_BINDING;CELL_DEVELOPMENT;CELL_FRACTION;CHAUHAN_RESPONSE_TO_METHOXYESTRADIOL_DN;CHIARADONNA_NEOPLASTIC_TRANSFORMATION_CDC25_UP;chr12q24;chr15q25;CYTOPLASM;CYTOPLASMIC_PART;CYTOSOL;DANG_BOUND_BY_MYC…	---	3D-structure;Acetylation;ATP-binding;Calcium;Chaperone;Completeproteome;Directproteinsequencing;Disulfidebond;Endoplasmicreticulum;Glycoprotein;Nucleotide-binding;Phosphoprotein;Referenceproteome;Signal;Stressresponse	+			Control vs CFNT		Endoplasmin	HSP90B1	P14625;Q58FF3	P14625	ENPLL_HUMAN	27	2381200000	271	0.00510083	0.0304314	1.62435
25.6415	28.1907	26.4897	25.8231	25.4757	26.4373	25.533	25.6054	25.095	24.2508	25.2479	22.8693	22.0796	25.2287	26.2617	23.6257	23.7349	25.897	23.2717	25.3831	24.9355	23.7066	24.291	27.3011	26.0127	23.8013	24.9781	cellular metabolic process;cellular process;cellular response to chemical stimulus;cellular response to oxidative stress;cellular response to oxygen radical;cellular response to reactive oxygen species;cellular response to stimulus;cellular response to stress;cellular response to superoxide;metabolic process;reactive oxygen species metabolic process;removal of superoxide radicals;response to chem…	antioxidant activity;binding;carbohydrate binding;catalytic activity;cation binding;copper ion binding;glycosaminoglycan binding;heparin binding;ion binding;metal ion binding;oxidoreductase activity;oxidoreductase activity, acting on superoxide radicals as acceptor;pattern binding;polysaccharide binding;superoxide dismutase activity;transition metal ion binding;zinc ion binding	cell part;cytoplasm;cytoplasmic part;extracellular matrix;extracellular membrane-bounded organelle;extracellular organelle;extracellular region;extracellular region part;extracellular space;extracellular vesicular exosome;Golgi apparatus part;Golgi lumen;intracellular membrane-bounded organelle;intracellular organelle;intracellular organelle lumen;intracellular organelle part;intracellular part;m…		AFFAR_YY1_TARGETS_DN;BENPORATH_EED_TARGETS;BIOCARTA_LONGEVITY_PATHWAY;CELL_FRACTION;CHIBA_RESPONSE_TO_TSA_UP;chr4p16;COLINA_TARGETS_OF_4EBP1_AND_4EBP2;DARWICHE_PAPILLOMA_RISK_HIGH_DN;DARWICHE_PAPILLOMA_RISK_LOW_DN;DARWICHE_SKIN_TUMOR_PROMOTER_UP;DARWICHE_SQUAMOUS_CELL_CARCINOMA_UP;GAUSSMANN_MLL_AF4_FUSION_TARGETS_A_DN;GGGAGGRR_V$MAZ_Q6;GSE14026_TH1_VS_TH17_UP;GSE17721_4_VS_24H_CPG_BMDM_UP;GSE1772…	---	3D-structure;Antioxidant;Completeproteome;Copper;Directproteinsequencing;Disulfidebond;Glycation;Glycoprotein;Heparin-binding;Metal-binding;Oxidoreductase;Polymorphism;Referenceproteome;Secreted;Signal;Zinc	+			Control vs CFNT		Extracellular superoxide dismutase [Cu-Zn]	SOD3	P08294	P08294	SODE_HUMAN	5	2201000000	182	0.00431265	0.027191	1.73743
27.3364	28.1713	26.7316	27.872	28.3708	28.7744	28.0893	27.6424	28.2762	28.1375	24.8463	24.2165	23.4549	25.1585	27.5578	25.6567	25.6095	26.7282	25.6191	28.1822	29.1398	26.1791	26.1622	27.3778	26.3747	27.1018	28.4213	anatomical structure morphogenesis;angiotensin maturation;anterior/posterior pattern specification;biological regulation;cellular macromolecule metabolic process;cellular metabolic process;cellular process;cellular protein metabolic process;developmental pigmentation;developmental process;eye pigmentation;head morphogenesis;hormone metabolic process;macromolecule metabolic process;metabolic proce…	aspartic-type endopeptidase activity;aspartic-type peptidase activity;catalytic activity;endopeptidase activity;hydrolase activity;peptidase activity;peptidase activity, acting on L-amino acid peptides;receptor activity	cell body;cell part;cell projection;external side of plasma membrane;extracellular membrane-bounded organelle;extracellular organelle;extracellular region part;extracellular vesicular exosome;integral to membrane;intrinsic to membrane;membrane;membrane part;membrane-bounded organelle;membrane-bounded vesicle;neuron projection;organelle;plasma membrane;plasma membrane part;vesicle		BAELDE_DIABETIC_NEPHROPATHY_DN;BLALOCK_ALZHEIMERS_DISEASE_DN;BRUINS_UVC_RESPONSE_VIA_TP53_GROUP_D;BURTON_ADIPOGENESIS_11;CELL_SURFACE;CELLULAR_MACROMOLECULE_METABOLIC_PROCESS;CELLULAR_PROTEIN_METABOLIC_PROCESS;CHEN_METABOLIC_SYNDROM_NETWORK;CHIBA_RESPONSE_TO_TSA;chrxp11;CYTOKINE_PRODUCTION;DAZARD_RESPONSE_TO_UV_SCC_UP;DIAZ_CHRONIC_MEYLOGENOUS_LEUKEMIA_UP;EXTERNAL_SIDE_OF_PLASMA_MEMBRANE;GRADE_COL…	---	3D-structure;Alternativesplicing;Completeproteome;Epilepsy;Membrane;Mentalretardation;Neurodegeneration;Parkinsonism;Phosphoprotein;Polymorphism;Receptor;Referenceproteome;Signal;Transmembrane;Transmembranehelix	+			Control vs CFNT		Renin receptor	ATP6AP2	O75787	O75787	RENR_HUMAN	15	7699200000	565	0.010189	0.044	1.75324
22.7893	22.9524	21.5201	22.9665	22.1816	23.5541	22.5763	22.0365	22.2515	22.4705	19.8752	19.7949	20.0279	22.6904	19.3269	21.0433	19.5122	19.6354	19.8034	23.0397	22.0683	19.1504	21.1618	21.8718	22.0169	19.4584	22.5444		binding;calcium ion binding;cation binding;ion binding;metal ion binding	extracellular region		AGGGCAG,MIR-18A;CHEN_METABOLIC_SYNDROM_NETWORK;chr5q31;CTIP_DN.V1_UP;GGCAGAC,MIR-346;GSE11924_TFH_VS_TH1_CD4_TCELL_DN;GSE11924_TFH_VS_TH17_CD4_TCELL_DN;GSE11924_TFH_VS_TH2_CD4_TCELL_DN;GSE14350_TREG_VS_TEFF_IN_IL2RB_KO_DN;GSE17974_0H_VS_0.5H_IN_VITRO_ACT_CD4_TCELL_UP;GSE17974_0H_VS_1H_IN_VITRO_ACT_CD4_TCELL_UP;GSE22886_NEUTROPHIL_VS_DC_UP;MEISSNER_NPC_HCP_WITH_H3K27ME3;MIKKELSEN_MCV6_HCP_WITH_H3K…	---	Alternativesplicing;Calcium;Completeproteome;Disulfidebond;Glycoprotein;Immunoglobulindomain;Metal-binding;Polymorphism;Referenceproteome;Repeat;Secreted;Signal	+			Control vs CFNT		Follistatin-related protein 4	FSTL4	Q6MZW2	Q6MZW2	FSTL4_HUMAN	8	173550000	33	0.00388142	0.0248	1.78282
24.8069	25.6923	24.3277	26.1598	25.1491	26.3901	25.2349	24.4471	24.9473	25.2421	22.2845	20.7841	20.2527	23.7992	23.8202	23.9095	23.4086	24.5543	23.5924	24.6945	26.0277	18.0227	22.1109	24.3489	23.9586	21.7043	24.3646	behavior;behavioral response to pain;cellular component organization;cellular component organization at cellular level;cellular component organization or biogenesis;cellular component organization or biogenesis at cellular level;cellular process;extracellular matrix organization;extracellular structure organization;multicellular organismal process;multicellular organismal response to stress;respo…		basement membrane;extracellular matrix;extracellular matrix part;extracellular membrane-bounded organelle;extracellular organelle;extracellular region part;extracellular space;extracellular vesicular exosome;interstitial matrix;membrane-bounded organelle;membrane-bounded vesicle;organelle;proteinaceous extracellular matrix;vesicle		CAGGTG_V$E12_Q6;CHEBOTAEV_GR_TARGETS_DN;chr1p36;ERB2_UP.V1_UP;GGGAGGRR_V$MAZ_Q6;GGGTGGRR_V$PAX4_03;GRAESSMANN_APOPTOSIS_BY_DOXORUBICIN_DN;GROSS_HYPOXIA_VIA_ELK3_AND_HIF1A_UP;GROSS_HYPOXIA_VIA_ELK3_DN;GROSS_HYPOXIA_VIA_HIF1A_DN;GSE13485_DAY7_VS_DAY21_YF17D_VACCINE_PBMC_DN;GSE13738_RESTING_VS_BYSTANDER_ACTIVATED_CD4_TCELL_UP;GSE15750_WT_VS_TRAF6KO_DAY10_EFF_CD8_TCELL_DN;GSE17721_0.5H_VS_12H_GARDIQU…	NABA_CORE_MATRISOME_Yes	Alternativesplicing;Basementmembrane;Completeproteome;Extracellularmatrix;Glycoprotein;Referenceproteome;Repeat;Secreted;Signal	+			Control vs CFNT		von Willebrand factor A domain-containing protein 1	VWA1	Q6PCB0	Q6PCB0	VWA1_HUMAN	13	1193200000	203	0.00699528	0.0336147	1.83521
27.4285	26.3615	26.1878	26.0707	28.2876	27.1694	26.7612	28.4449	24.426	24.7789	23.7948	24.1467	22.2985	26.5972	27.4028	25.6614	28.2761	26.0487	25.2748	24.3382	28.4127	24.2428	26.3864	26.2995	23.5874	22.7033	24.4843	acylglycerol metabolic process;alcohol metabolic process;biological regulation;body fluid secretion;carboxylic acid catabolic process;carboxylic acid metabolic process;catabolic process;cellular catabolic process;cellular ketone metabolic process;cellular lipid catabolic process;cellular lipid metabolic process;cellular macromolecule metabolic process;cellular metabolic process;cellular process;c…	acylglycerol lipase activity;binding;carbohydrate binding;carboxylic ester hydrolase activity;catalytic activity;glycosaminoglycan binding;heparin binding;hydrolase activity;hydrolase activity, acting on ester bonds;lipase activity;pattern binding;polysaccharide binding;sterol esterase activity;triglyceride lipase activity	cell part;cytoplasm;extracellular membrane-bounded organelle;extracellular organelle;extracellular region;extracellular region part;extracellular space;extracellular vesicular exosome;intracellular part;membrane-bounded organelle;membrane-bounded vesicle;organelle;vesicle		ALCOHOL_METABOLIC_PROCESS;BERGER_MBD2_TARGETS;BODY_FLUID_SECRETION;BROWNE_HCMV_INFECTION_10HR_UP;BROWNE_HCMV_INFECTION_30MIN_DN;BROWNE_HCMV_INFECTION_48HR_DN;BRUINS_UVC_RESPONSE_VIA_TP53_GROUP_A;CAGGTG_V$E12_Q6;CATABOLIC_PROCESS;CELLULAR_CATABOLIC_PROCESS;CELLULAR_LIPID_CATABOLIC_PROCESS;CELLULAR_LIPID_METABOLIC_PROCESS;chr9q34;CROMER_TUMORIGENESIS_DN;CYTOPLASM;DIGESTION;ESTABLISHMENT_OF_LOCALIZA…	---	3D-structure;Alternativesplicing;Completeproteome;Diabetesmellitus;Directproteinsequencing;Disulfidebond;Glycoprotein;Hydrolase;Lipiddegradation;Lipidmetabolism;Referenceproteome;Repeat;Secreted;Serineesterase;Signal	+			Control vs CFNT		Bile salt-activated lipase	CEL	P19835	P19835	CEL_HUMAN	21	3761300000	368	0.0108578	0.0440296	1.83527
21.6748	21.6937	21.3473	21.7012	21.9264	21.5527	22.2013	21.6802	18.3682	19.0119	18.8079	19.4569	19.6068	20.1297	21.7667	21.693	21.9141	18.9293	19.2874	18.9308	25.975	21.8073	21.5257	20.4884	21.5961	18.8367	18.7681	developmental process;multicellular organismal development;multicellular organismal process	receptor activity	cell part;extracellular membrane-bounded organelle;extracellular organelle;extracellular region part;extracellular vesicular exosome;integral to membrane;intrinsic to membrane;membrane part;membrane-bounded organelle;membrane-bounded vesicle;organelle;vesicle		AACTTT_UNKNOWN;AGGTGCA,MIR-500;BRUINS_UVC_RESPONSE_LATE;CATTGTYY_V$SOX9_B1;CCCNNGGGAR_V$OLF1_01;CERVERA_SDHB_TARGETS_1_UP;CHEN_METABOLIC_SYNDROM_NETWORK;chr10p12;COATES_MACROPHAGE_M1_VS_M2_UP;CTGYNNCTYTAA_UNKNOWN;CTTTAAR_UNKNOWN;CUI_TCF21_TARGETS_2_DN;GAUSSMANN_MLL_AF4_FUSION_TARGETS_F_UP;GGGAGGRR_V$MAZ_Q6;GOBERT_OLIGODENDROCYTE_DIFFERENTIATION_DN;GSE11057_CD4_EFF_MEM_VS_PBMC_DN;GSE11924_TH2_VS_T…	---	Alternativesplicing;Completeproteome;Glycoprotein;Membrane;Phosphoprotein;Polymorphism;Referenceproteome;Signal;Transmembrane;Transmembranehelix	+			Control vs CFNT		Plexin domain-containing protein 2	PLXDC2	Q6UX71	Q6UX71	PXDC2_HUMAN	5	151970000	23	0.00060177	0.0126154	1.89696
20.811	24.8422	22.4912	23.7343	24.8419	23.5984	21.7388	22.0288	20.2427	20.8522	21.3064	19.8321	22.8256	22.3731	22.2266	20.3406	18.898	22.4723	19.7921	21.2591	22.1265	18.8606	24.3299	23.0123	22.5839	19.5817	19.936	amine metabolic process;biological regulation;carbohydrate metabolic process;carboxylic acid metabolic process;cell differentiation;cellular aldehyde metabolic process;cellular amine metabolic process;cellular amino acid metabolic process;cellular developmental process;cellular ketone metabolic process;cellular metabolic process;cellular modified amino acid metabolic process;cellular nitrogen com…	binding;carbon-sulfur lyase activity;catalytic activity;cation binding;ion binding;lactoylglutathione lyase activity;lyase activity;metal ion binding;transition metal ion binding;zinc ion binding	cell part;cytoplasm;extracellular membrane-bounded organelle;extracellular organelle;extracellular region part;extracellular vesicular exosome;intracellular part;membrane-bounded organelle;membrane-bounded vesicle;organelle;vesicle	MAPK signaling pathway - yeast;Pyruvate metabolism	ALONSO_METASTASIS_UP;ANTI_APOPTOSIS;APOPTOSIS_GO;BAUS_TFF2_TARGETS_UP;BLALOCK_ALZHEIMERS_DISEASE_DN;BORCZUK_MALIGNANT_MESOTHELIOMA_UP;BYSTRYKH_HEMATOPOIESIS_STEM_CELL_AND_BRAIN_QTL_CIS;BYSTRYKH_HEMATOPOIESIS_STEM_CELL_QTL_CIS;BYSTRYKH_HEMATOPOIESIS_STEM_CELL_QTL_TRANS;CAMP_UP.V1_DN;CASORELLI_ACUTE_PROMYELOCYTIC_LEUKEMIA_DN;CELL_DEVELOPMENT;CHANGOLKAR_H2AFY_TARGETS_UP;CHESLER_BRAIN_HIGHEST_EXPRESS…	---	3D-structure;Acetylation;Alternativesplicing;Completeproteome;Directproteinsequencing;Disulfidebond;Glutathionylation;Lyase;Metal-binding;Phosphoprotein;Polymorphism;Referenceproteome;Zinc	+			Control vs CFNT		Lactoylglutathione lyase	GLO1	Q04760	Q04760	LGUL_HUMAN	5	296800000	33	0.00477299	0.026	1.97576
29.3679	29.6626	27.9567	29.4402	29.1037	29.3879	29.237	28.975	28.3129	28.2873	27.3202	26.0887	24.8882	26.9106	28.1829	25.8204	25.479	28.2614	27.7774	28.6145	29.1226	27.3257	27.2869	29.2568	27.9759	27.6118	28.6127	anatomical structure development;anatomical structure morphogenesis;biological adhesion;cell adhesion;cell communication;cell-cell adhesion;cellular process;developmental process;homophilic cell adhesion;inner ear development;morphogenesis of an epithelium;tissue morphogenesis	binding;calcium ion binding;cation binding;ion binding;metal ion binding	basement membrane;cell part;extracellular matrix part;extracellular membrane-bounded organelle;extracellular organelle;extracellular region part;extracellular vesicular exosome;integral to membrane;intrinsic to membrane;membrane;membrane part;membrane-bounded organelle;membrane-bounded vesicle;organelle;plasma membrane;vesicle		CHARAFE_BREAST_CANCER_LUMINAL_VS_MESENCHYMAL_UP;CHEMNITZ_RESPONSE_TO_PROSTAGLANDIN_E2_DN;chr13q13;CREIGHTON_ENDOCRINE_THERAPY_RESISTANCE_1;CREIGHTON_ENDOCRINE_THERAPY_RESISTANCE_4;DUTERTRE_ESTRADIOL_RESPONSE_24HR_UP;GSE26928_NAIVE_VS_CENT_MEMORY_CD4_TCELL_DN;GSE2706_LPS_VS_R848_AND_LPS_2H_STIM_DC_UP;GSE2706_R848_VS_R848_AND_LPS_2H_STIM_DC_UP;IWANAGA_CARCINOGENESIS_BY_KRAS_PTEN_UP;MASSARWEH_TAMOXI…	---	Alternativesplicing;Calcium;Celladhesion;Cellmembrane;Completeproteome;Developmentalprotein;Diseasemutation;Glycoprotein;Membrane;Metal-binding;Polymorphism;Referenceproteome;Repeat;Signal;Transmembrane;Transmembranehelix	+			Control vs CFNT	+	FRAS1-related extracellular matrix protein 2	FREM2	Q5SZK8	Q5SZK8	FREM2_HUMAN	92	15272000000	2063	0.000695255	0.0125926	1.97942
24.5717	22.0516	21.694	21.3156	21.9589	21.8894	24.0474	22.3008	19.5594	21.1025	19.1083	18.0935	20.0782	21.4807	21.5476	21.7017	20.054	21.4952	19.6949	21.7966	22.4159	20.2355	21.6033	22.6465	21.8081	19.9981	18.7052	biological regulation;developmental process;macromolecule metabolic process;metabolic process;multicellular organismal development;multicellular organismal process;positive regulation of catalytic activity;positive regulation of hydrolase activity;positive regulation of molecular function;positive regulation of peptidase activity;primary metabolic process;protein metabolic process;proteolysis;reg…	binding;carbohydrate binding;collagen binding;enzyme activator activity;enzyme regulator activity;glycosaminoglycan binding;heparin binding;pattern binding;peptidase activator activity;peptidase regulator activity;polysaccharide binding;protein binding	extracellular membrane-bounded organelle;extracellular organelle;extracellular region part;extracellular space;extracellular vesicular exosome;membrane-bounded organelle;membrane-bounded vesicle;organelle;vesicle		ACEVEDO_LIVER_CANCER_DN;ACEVEDO_NORMAL_TISSUE_ADJACENT_TO_LIVER_TUMOR_DN;ANASTASSIOU_CANCER_MESENCHYMAL_TRANSITION_SIGNATURE;ATGTTTC,MIR-494;BANDRES_RESPONSE_TO_CARMUSTIN_MGMT_48HR_DN;BERENJENO_TRANSFORMED_BY_RHOA_DN;BOQUEST_STEM_CELL_UP;BRUINS_UVC_RESPONSE_LATE;BRUINS_UVC_RESPONSE_VIA_TP53_GROUP_A;CHEN_METABOLIC_SYNDROM_NETWORK;CHIARADONNA_NEOPLASTIC_TRANSFORMATION_KRAS_DN;CHICAS_RB1_TARGETS_CON…	NABA_CORE_MATRISOME_Yes	3D-structure;Completeproteome;Directproteinsequencing;Disulfidebond;Glycoprotein;Phosphoprotein;Referenceproteome;Repeat;Secreted;Signal	+			Control vs CFNT		Procollagen C-endopeptidase enhancer 1	PCOLCE	Q15113	Q15113	PCOC1_HUMAN	3	150020000	26	0.00177529	0.0190698	2.00263
22.4371	21.7164	22.7025	22.2346	21.7916	21.8569	22.9109	22.2556	18.1803	20.2909	22.0836	18.997	18.5464	19.6002	23.0852	19.6855	19.1329	19.5786	19.1329	24.2085	18.3902	20.855	23.4661	22.1008	22.7875	22.0188	20.2588	carbohydrate transmembrane transport;carbohydrate transport;cation transport;cellular metabolic process;cellular nitrogen compound metabolic process;cellular process;establishment of localization;glucose import;glucose transport;heterocycle metabolic process;hexose transmembrane transport;hexose transport;hydrogen transport;ion transport;metabolic process;monosaccharide transport;monovalent inorg…	active transmembrane transporter activity;carbohydrate transmembrane transporter activity;cation transmembrane transporter activity;cation:sugar symporter activity;glucose transmembrane transporter activity;hexose transmembrane transporter activity;ion transmembrane transporter activity;monosaccharide transmembrane transporter activity;secondary active transmembrane transporter activity;solute:ca…	apical plasma membrane;basolateral plasma membrane;cell part;envelope;integral to membrane;integral to plasma membrane;intracellular organelle part;intracellular part;intrinsic to membrane;intrinsic to plasma membrane;membrane;membrane part;nuclear envelope;nuclear part;organelle envelope;organelle part;plasma membrane;plasma membrane part		BLALOCK_ALZHEIMERS_DISEASE_UP;CHEMNITZ_RESPONSE_TO_PROSTAGLANDIN_E2_DN;CHIANG_LIVER_CANCER_SUBCLASS_CTNNB1_DN;chr4p16;FEVR_CTNNB1_TARGETS_UP;GRADE_COLON_CANCER_UP;GSE14308_NAIVE_CD4_TCELL_VS_NATURAL_TREG_DN;GSE18791_CTRL_VS_NEWCASTLE_VIRUS_DC_10H_UP;GSE20151_CTRL_VS_FUSOBACT_NUCLEATUM_NEUTROPHIL_DN;GSE20715_0H_VS_48H_OZONE_TLR4_KO_LUNG_UP;GSE20715_0H_VS_6H_OZONE_TLR4_KO_LUNG_UP;GSE20715_WT_VS_TLR…	---	Alternativesplicing;Cellmembrane;Completeproteome;Diseasemutation;Glycoprotein;Membrane;Phosphoprotein;Polymorphism;Referenceproteome;Sugartransport;Transmembrane;Transmembranehelix;Transport	+			Control vs CFNT		Solute carrier family 2, facilitated glucose transporter member 9	SLC2A9	Q9NRM0	Q9NRM0	GTR9_HUMAN	4	170770000	27	0.0085582	0.0349744	2.02804
22.5215	22.4928	22.1262	22.8416	23.1554	22.5619	22.233	22.6899	18.9069	23.1412	18.3092	22.7941	20.6163	23.5918	19.5027	19.5502	19.99	20.3569	19.1242	20.6851	23.7451	24.5508	18.5707	22.1026	20.6284	18.606	19.6619	apoptosis;biological regulation;catabolic process;cell death;cell surface receptor linked signaling pathway;cellular catabolic process;cellular component disassembly;cellular component disassembly at cellular level;cellular component disassembly involved in apoptosis;cellular component organization;cellular component organization at cellular level;cellular component organization or biogenesis;cel…	binding;cation binding;enzyme binding;ion binding;metal ion binding;nuclear localization sequence binding;peptide binding;protein binding;protein domain specific binding;protein transporter activity;signal sequence binding;substrate-specific transporter activity;transition metal ion binding;transporter activity;zinc ion binding	cell part;cytoplasm;cytoplasmic part;cytosol;endoplasmic reticulum part;endoplasmic reticulum tubular network;envelope;extracellular membrane-bounded organelle;extracellular organelle;extracellular region part;extracellular vesicular exosome;intracellular organelle part;intracellular part;macromolecular complex;membrane;membrane part;membrane-bounded organelle;membrane-bounded vesicle;nuclear env…	RNA transport	AACYNNNNTTCCS_UNKNOWN;AAGCACT,MIR-520F;ABRAMSON_INTERACT_WITH_AIRE;ACCATTT,MIR-522;ACEVEDO_LIVER_CANCER_UP;AGGAGTG,MIR-483;AGUIRRE_PANCREATIC_CANCER_COPY_NUMBER_UP;BENPORATH_CYCLING_GENES;BERENJENO_TRANSFORMED_BY_RHOA_UP;BIOCARTA_RANMS_PATHWAY;BLALOCK_ALZHEIMERS_DISEASE_DN;BLALOCK_ALZHEIMERS_DISEASE_UP;BLUM_RESPONSE_TO_SALIRASIB_DN;BOYAULT_LIVER_CANCER_SUBCLASS_G3_UP;CAIRO_HEPATOBLASTOMA_CLASSES_…	---	3D-structure;Acetylation;ADP-ribosylation;Alternativesplicing;Completeproteome;Cytoplasm;Directproteinsequencing;Host-virusinteraction;Isopeptidebond;Nucleus;Phosphoprotein;Proteintransport;Referenceproteome;Repeat;Transport;Ublconjugation	+			Control vs CFNT		Importin subunit beta-1	KPNB1	Q14974	Q14974	IMB1_HUMAN	9	248180000	54	0.00456615	0.0245116	2.03041
22.9887	24.2155	23.1582	22.8322	24.0632	23.2341	22.4158	23.1505	23.1366	22.8317	19.815	22.88	23.8013	22.7073	19.9113	19.138	20.672	19.3013	20.7135	18.4492	23.5651	23.79	23.1463	22.8586	22.714	18.5717	19.1128	acylglycerol biosynthetic process;acylglycerol metabolic process;alcohol catabolic process;alcohol metabolic process;alditol catabolic process;alditol metabolic process;biological regulation;biosynthetic process;carbohydrate catabolic process;carbohydrate metabolic process;carboxylic acid biosynthetic process;carboxylic acid metabolic process;catabolic process;cellular biosynthetic process;cellul…	binding;catalytic activity;channel regulator activity;coenzyme binding;cofactor binding;glycerol-3-phosphate dehydrogenase [NAD+] activity;ion channel binding;NAD binding;nucleotide binding;oxidoreductase activity;oxidoreductase activity, acting on CH-OH group of donors;oxidoreductase activity, acting on the CH-OH group of donors, NAD or NADP as acceptor;protein binding;sodium channel regulator a…	cell part;cytoplasmic part;cytosol;extracellular membrane-bounded organelle;extracellular organelle;extracellular region part;extracellular vesicular exosome;glycerol-3-phosphate dehydrogenase complex;intracellular part;macromolecular complex;membrane;membrane-bounded organelle;membrane-bounded vesicle;organelle;plasma membrane;protein complex;vesicle	Glycerophospholipid metabolism	ACGCACA,MIR-210;ACTAYRNNNCCCR_UNKNOWN;ACTGTAG,MIR-139;ALFANO_MYC_TARGETS;BASAKI_YBX1_TARGETS_DN;BENPORATH_ES_WITH_H3K27ME3;BILD_MYC_ONCOGENIC_SIGNATURE;BMI1_DN.V1_DN;CAGGTG_V$E12_Q6;CHARAFE_BREAST_CANCER_LUMINAL_VS_BASAL_UP;CHARAFE_BREAST_CANCER_LUMINAL_VS_MESENCHYMAL_UP;CHIANG_LIVER_CANCER_SUBCLASS_PROLIFERATION_UP;chr3p22;DOANE_BREAST_CANCER_CLASSES_UP;DODD_NASOPHARYNGEAL_CARCINOMA_UP;FARMER_BR…	---	3D-structure;Brugadasyndrome;Completeproteome;Cytoplasm;Diseasemutation;NAD;Oxidoreductase;Polymorphism;Referenceproteome	+			Control vs CFNT		Glycerol-3-phosphate dehydrogenase 1-like protein	GPD1L	Q8N335	Q8N335	GPD1L_HUMAN	7	325650000	20	0.00564375	0.0272527	2.14417
23.0727	23.2421	23.5594	23.2943	22.8487	22.9952	22.7991	23.4692	19.0252	22.2528	20.4058	22.493	19.9229	23.1639	23.3859	18.2424	19.5245	22.8478	20.076	19.7238	17.5781	22.9158	22.5485	23.0774	23.2424	22.3464	20.0642	antigen processing and presentation;biological regulation;cellular component organization;cellular component organization at cellular level;cellular component organization or biogenesis;cellular component organization or biogenesis at cellular level;cellular localization;cellular macromolecule localization;cellular membrane organization;cellular process;cellular protein localization;cellular resp…	binding;catalytic activity;enzyme binding;GTP binding;GTPase activity;GTPase binding;guanyl nucleotide binding;guanyl ribonucleotide binding;hydrolase activity;hydrolase activity, acting on acid anhydrides;hydrolase activity, acting on acid anhydrides, in phosphorus-containing anhydrides;nucleoside-triphosphatase activity;nucleotide binding;protein binding;purine nucleotide binding;purine ribonuc…	cell part;cytoplasmic membrane-bounded vesicle;cytoplasmic part;cytoplasmic vesicle;cytoplasmic vesicle membrane;cytoplasmic vesicle part;endocytic vesicle;endocytic vesicle membrane;extracellular membrane-bounded organelle;extracellular organelle;extracellular region part;extracellular vesicular exosome;Golgi apparatus;Golgi apparatus part;Golgi cisterna;Golgi stack;intracellular membrane-bounde…		ACCAAAG,MIR-9;BRUECKNER_TARGETS_OF_MIRLET7A3_DN;CHANDRAN_METASTASIS_DN;CHANDRAN_METASTASIS_TOP50_DN;CHARAFE_BREAST_CANCER_LUMINAL_VS_MESENCHYMAL_DN;CHEN_METABOLIC_SYNDROM_NETWORK;chr17q11;FERREIRA_EWINGS_SARCOMA_UNSTABLE_VS_STABLE_DN;GCNP_SHH_UP_LATE.V1_DN;GGGCGGR_V$SP1_Q6;GSE10239_NAIVE_VS_DAY4.5_EFF_CD8_TCELL_DN;GSE10239_NAIVE_VS_KLRG1HIGH_EFF_CD8_TCELL_DN;GSE10239_NAIVE_VS_KLRG1INT_EFF_CD8_TCE…	---	Acetylation;Alternativesplicing;Completeproteome;Cytoplasm;Cytoplasmicvesicle;Golgiapparatus;GTP-binding;Lipoprotein;Membrane;Nucleotide-binding;Phosphoprotein;Polymorphism;Prenylation;Proteintransport;Referenceproteome;Transport	+			Control vs CFNT		Ras-related protein Rab-34	RAB34	Q9BZG1	Q9BZG1	RAB34_HUMAN	6	266980000	59	0.00267203	0.0210769	2.23808
28.3894	27.884	27.1108	27.2841	27.0255	27.8907	28.6523	26.4883	25.5839	27.9863	25.8601	22.3305	22.1175	26.7672	27.1163	24.8081	24.2222	24.8793	26.034	26.2857	22.7189	25.7934	23.459	28.5688	27.0486	26.7093	25.8922			extracellular membrane-bounded organelle;extracellular organelle;extracellular region part;extracellular vesicular exosome;fibrinogen complex;macromolecular complex;membrane-bounded organelle;membrane-bounded vesicle;organelle;protein complex;vesicle		ALK_DN.V1_DN;ALTEMEIER_RESPONSE_TO_LPS_WITH_MECHANICAL_VENTILATION;BILBAN_B_CLL_LPL_DN;BOCHKIS_FOXA2_TARGETS;BOQUEST_STEM_CELL_CULTURED_VS_FRESH_UP;BORLAK_LIVER_CANCER_EGF_UP;BOYLAN_MULTIPLE_MYELOMA_C_D_DN;BOYLAN_MULTIPLE_MYELOMA_PCA1_UP;BURTON_ADIPOGENESIS_2;BURTON_ADIPOGENESIS_PEAK_AT_8HR;CHANDRAN_METASTASIS_DN;chr7q11;DELYS_THYROID_CANCER_DN;DIAZ_CHRONIC_MEYLOGENOUS_LEUKEMIA_DN;EXTRACELLULAR_R…	NABA_CORE_MATRISOME_Yes	Coiledcoil;Completeproteome;Disulfidebond;Glycoprotein;Polymorphism;Referenceproteome;Secreted;Signal	+			Control vs CFNT		Fibroleukin	FGL2	Q14314	Q14314	FGL2_HUMAN	19	6242000000	412	0.00344241	0.0225625	2.25805
23.9089	25.7535	23.4555	23.5134	24.8515	24.6194	23.3404	24.4521	24.7055	22.7261	19.5834	18.8941	19.3073	22.1807	24.218	19.568	23.5157	24.3075	22.4739	22.1766	23.5641	24.5184	19.9725	25.6303	22.8273	19.3939	19.0316	anatomical structure formation involved in morphogenesis;angiogenesis;axon guidance;biological regulation;biosynthetic process;cell differentiation;cellular biosynthetic process;cellular component disassembly;cellular component disassembly at cellular level;cellular component organization;cellular component organization at cellular level;cellular component organization or biogenesis;cellular comp…	extracellular matrix structural constituent;structural molecule activity	cell part;collagen;collagen type IV;cytoplasmic part;endoplasmic reticulum lumen;endoplasmic reticulum part;extracellular matrix;extracellular matrix part;extracellular membrane-bounded organelle;extracellular organelle;extracellular region;extracellular region part;extracellular vesicular exosome;intracellular membrane-bounded organelle;intracellular organelle;intracellular organelle lumen;intra…	Amoebiasis;ECM-receptor interaction;Focal adhesion;Pathways in cancer;Protein digestion and absorption;Small cell lung cancer	ACCAAAG,MIR-9;ACEVEDO_LIVER_CANCER_UP;AMIT_EGF_RESPONSE_480_HELA;ANATOMICAL_STRUCTURE_DEVELOPMENT;ANATOMICAL_STRUCTURE_FORMATION;ANATOMICAL_STRUCTURE_MORPHOGENESIS;ANGIOGENESIS;BASEMENT_MEMBRANE;BERENJENO_ROCK_SIGNALING_NOT_VIA_RHOA_DN;BIOCARTA_ACE2_PATHWAY;BIOCARTA_AMI_PATHWAY;BIOCARTA_INTRINSIC_PATHWAY;BIOCARTA_PLATELETAPP_PATHWAY;BIOCARTA_VITCB_PATHWAY;BRUECKNER_TARGETS_OF_MIRLET7A3_DN;BRUINS_…	NABA_CORE_MATRISOME_Yes	3D-structure;Angiogenesis;Basementmembrane;Collagen;Completeproteome;Directproteinsequencing;Diseasemutation;Disulfidebond;Extracellularmatrix;Glycoprotein;Hydroxylation;Polymorphism;Referenceproteome;Repeat;Secreted;Signal	+			Control vs CFNT		Collagen alpha-2(IV) chain;Canstatin	COL4A2	P08572	P08572	CO4A2_HUMAN	6	558280000	75	0.0104194	0.0378033	2.26544
23.2815	22.8121	24.3397	24.0195	23.0113	23.7233	23.2772	23.3117	19.2432	19.795	19.4317	24.7797	19.2617	24.0012	22.2749	19.5288	18.0054	23.5563	22.7249	19.3405	23.2734	21.278	24.6733	18.1208	23.128	22.4139	23.5694	metabolic process	binding;catalytic activity;cation binding;hydrolase activity;hydrolase activity, acting on ester bonds;ion binding;metal ion binding;transition metal ion binding;zinc ion binding	cell part;extracellular membrane-bounded organelle;extracellular organelle;extracellular region part;extracellular vesicular exosome;intracellular membrane-bounded organelle;intracellular organelle;intracellular part;membrane-bounded organelle;membrane-bounded vesicle;nucleus;organelle;vesicle			---	3D-structure;Alternativesplicing;Completeproteome;Hydrolase;Metal-binding;Nucleus;Phosphoprotein;Referenceproteome;Zinc	+			Control vs CFNT		Ester hydrolase C11orf54	C11orf54	Q9H0W9	Q9H0W9		4	365030000	69	0.00825233	0.0313077	2.47676
25.4525	25.0121	22.8787	25.0563	23.4326	25.2211	24.2683	23.6638	23.4584	19.2793	19.3768	19.6752	20.1339	22.8921	22.425	23.5814	19.0159	25.5819	23.2426	23.4646	27.3376	19.0064	23.5347	25.0714	22.5609	19.8306	20.1627	amine metabolic process;aminoglycan biosynthetic process;aminoglycan catabolic process;aminoglycan metabolic process;biological adhesion;biosynthetic process;carbohydrate biosynthetic process;carbohydrate catabolic process;carbohydrate metabolic process;catabolic process;cell adhesion;cellular biosynthetic process;cellular catabolic process;cellular metabolic process;cellular process;glycosaminog…		cell part;cytoplasmic part;extracellular matrix;extracellular membrane-bounded organelle;extracellular organelle;extracellular region;extracellular region part;extracellular vesicular exosome;Golgi apparatus part;Golgi lumen;intracellular organelle lumen;intracellular organelle part;intracellular part;lysosomal lumen;membrane-bounded organelle;membrane-bounded vesicle;membrane-enclosed lumen;orga…		BEGUM_TARGETS_OF_PAX3_FOXO1_FUSION_UP;BERTUCCI_INVASIVE_CARCINOMA_DUCTAL_VS_LOBULAR_DN;BOCHKIS_FOXA2_TARGETS;BOQUEST_STEM_CELL_CULTURED_VS_FRESH_DN;BOQUEST_STEM_CELL_CULTURED_VS_FRESH_UP;BOQUEST_STEM_CELL_UP;BROWNE_HCMV_INFECTION_6HR_UP;BYSTRYKH_HEMATOPOIESIS_STEM_CELL_QTL_TRANS;CAHOY_ASTROGLIAL;chr9q22;CTTTGT_V$LEF1_Q2;GAUSSMANN_MLL_AF4_FUSION_TARGETS_B_UP;GRESHOCK_CANCER_COPY_NUMBER_UP;GSE11864…	NABA_CORE_MATRISOME_Yes	Celladhesion;Completeproteome;Disulfidebond;Extracellularmatrix;Glycoprotein;Leucine-richrepeat;Polymorphism;Proteoglycan;Referenceproteome;Repeat;Secreted;Signal;Sulfation	+			Control vs CFNT		Osteomodulin	OMD	Q99983	Q99983	OMD_HUMAN	6	779520000	65	0.00723726	0.0285417	2.52924
26.0556	24.4711	23.7237	25.2488	25.4476	25.3359	26.4839	25.5797	23.2086	21.7458	20.6097	21.5344	20.1056	24.078	22.6695	22.529	23.7906	25.2819	23.4179	22.9418	27.1587	19.0586	23.4841	23.8682	24.4188	22.5132	18.7259	alcohol metabolic process;amine metabolic process;biological regulation;biosynthetic process;cellular amine metabolic process;cellular biogenic amine metabolic process;cellular biosynthetic process;cellular component organization;cellular component organization or biogenesis;cellular lipid metabolic process;cellular macromolecule biosynthetic process;cellular macromolecule metabolic process;cellu…	apolipoprotein A-I binding;apolipoprotein binding;binding;catalytic activity;O-acyltransferase activity;phosphatidylcholine-sterol O-acyltransferase activity;protein binding;transferase activity;transferase activity, transferring acyl groups;transferase activity, transferring acyl groups other than amino-acyl groups	extracellular membrane-bounded organelle;extracellular organelle;extracellular region;extracellular region part;extracellular space;extracellular vesicular exosome;high-density lipoprotein particle;macromolecular complex;membrane-bounded organelle;membrane-bounded vesicle;organelle;plasma lipoprotein particle;protein-lipid complex;vesicle	Glycerophospholipid metabolism	ACEVEDO_LIVER_CANCER_DN;ACEVEDO_LIVER_TUMOR_VS_NORMAL_ADJACENT_TISSUE_DN;BIOSYNTHETIC_PROCESS;BORCZUK_MALIGNANT_MESOTHELIOMA_DN;CAIRO_HEPATOBLASTOMA_DN;CAIRO_LIVER_DEVELOPMENT_DN;CELLULAR_LIPID_METABOLIC_PROCESS;CHEMICAL_HOMEOSTASIS;chr16q22;CHYLA_CBFA2T3_TARGETS_DN;ESTABLISHMENT_OF_LOCALIZATION;EXTRACELLULAR_REGION;EXTRACELLULAR_REGION_PART;EXTRACELLULAR_SPACE;GATAAGR_V$GATA_C;GGGAGGRR_V$MAZ_Q6;…	---	3D-structure;Acyltransferase;Cholesterolmetabolism;Completeproteome;Cornealdystrophy;Directproteinsequencing;Diseasemutation;Disulfidebond;Glycoprotein;Lipidmetabolism;Polymorphism;Referenceproteome;Secreted;Signal;Steroidmetabolism;Sterolmetabolism;Transferase	+			Control vs CFNT		Phosphatidylcholine-sterol acyltransferase	LCAT	P04180	P04180	LCAT_HUMAN	8	1080400000	135	0.000259537	0.008	2.63389
23.1723	22.6508	23.7909	23.8943	24.1436	23.3798	24.3049	23.6933	18.5064	22.7162	20.162	18.7947	18.8632	23.1772	23.0306	21.3684	20.2076	22.1714	22.8195	18.9241	18.8992	19.8216	22.4049	22.5183	23.041	24.0187	22.4309	biological regulation;cell surface receptor linked signaling pathway;cellular macromolecule metabolic process;cellular metabolic process;cellular process;cellular protein metabolic process;cellular response to stimulus;cellular response to stress;DNA damage response, signal transduction by p53 class mediator;DNA damage response, signal transduction by p53 class mediator resulting in induction of …	adenyl nucleotide binding;adenyl ribonucleotide binding;ATP binding;binding;catalytic activity;cation binding;ion binding;kinase activity;magnesium ion binding;manganese ion binding;metal ion binding;nucleotide binding;phosphotransferase activity, alcohol group as acceptor;protein binding;protein kinase activity;protein serine/threonine kinase activity;protein serine/threonine/tyrosine kinase act…	cell part;cytoplasm;intracellular membrane-bounded organelle;intracellular organelle;intracellular organelle part;intracellular part;macromolecular complex;membrane-bounded organelle;nuclear part;nucleoplasm;nucleus;organelle;organelle part;protein complex;ribonucleoprotein complex;ubiquitin ligase complex		ADENYL_NUCLEOTIDE_BINDING;ADENYL_RIBONUCLEOTIDE_BINDING;AGUIRRE_PANCREATIC_CANCER_COPY_NUMBER_DN;APOPTOSIS_GO;ATATGCA,MIR-448;ATGCTGG,MIR-338;ATP_BINDING;BIOPOLYMER_BIOSYNTHETIC_PROCESS;BIOPOLYMER_METABOLIC_PROCESS;BIOPOLYMER_MODIFICATION;BIOSYNTHETIC_PROCESS;BOHN_PRIMARY_IMMUNODEFICIENCY_SYNDROM_DN;BOYLAN_MULTIPLE_MYELOMA_C_D_UP;BOYLAN_MULTIPLE_MYELOMA_C_UP;BROWNE_HCMV_INFECTION_1HR_DN;BROWNE_HC…	---	3D-structure;Alternativesplicing;Apoptosis;ATP-binding;Completeproteome;Cytoplasm;Kinase;Magnesium;Manganese;Nucleotide-binding;Nucleus;Phosphoprotein;Polymorphism;Referenceproteome;Serine/threonine-proteinkinase;Transferase;Tyrosine-proteinkinase;Ublconjugation;Ublconjugationpathway	+			Control vs CFNT		Dual specificity tyrosine-phosphorylation-regulated kinase 2	DYRK2	Q92630	Q92630	DYRK2_HUMAN	7	312700000	65	0.000792473	0.011	2.73364
28.3348	27.9684	25.1224	28.1834	25.7577	27.8037	29.6874	27.8877	25.8025	21.8352	24.2102	24.5709	21.157	27.0259	25.4978	26.9142	21.3593	26.0807	21.9309	29.5007	25.7085	24.6456	25.7311	26.7949	27.8741	20.7795	26.2517	acylglycerol metabolic process;acylglycerol transport;alcohol metabolic process;amine metabolic process;biological regulation;cellular amine metabolic process;cellular biogenic amine metabolic process;cellular component organization;cellular component organization or biogenesis;cellular lipid metabolic process;cellular macromolecule metabolic process;cellular membrane organization;cellular metabo…	alcohol binding;amine binding;binding;cation binding;cholesterol binding;cholesterol transporter activity;ion binding;lipid binding;lipid transporter activity;phosphatidylcholine binding;phospholipid binding;phospholipid transporter activity;quaternary ammonium group binding;steroid binding;sterol binding;sterol transporter activity;substrate-specific transporter activity;transporter activity;tri…	extracellular membrane-bounded organelle;extracellular organelle;extracellular region;extracellular region part;extracellular space;extracellular vesicular exosome;high-density lipoprotein particle;macromolecular complex;membrane-bounded organelle;membrane-bounded vesicle;organelle;plasma lipoprotein particle;protein-lipid complex;vesicle		CAIRO_HEPATOBLASTOMA_DN;CELLULAR_LIPID_METABOLIC_PROCESS;CELLULAR_MACROMOLECULE_METABOLIC_PROCESS;CELLULAR_PROTEIN_METABOLIC_PROCESS;CHEMICAL_HOMEOSTASIS;chr16q13;CYCLIN_D1_UP.V1_UP;ESTABLISHMENT_OF_LOCALIZATION;EXTRACELLULAR_REGION;EXTRACELLULAR_REGION_PART;EXTRACELLULAR_SPACE;GLYCEROPHOSPHOLIPID_METABOLIC_PROCESS;GSE10325_MYELOID_VS_LUPUS_MYELOID_UP;GSE13411_IGM_VS_SWITCHED_MEMORY_BCELL_DN;GSE3…	---	3D-structure;Alternativesplicing;Atherosclerosis;Cholesterolmetabolism;Completeproteome;Directproteinsequencing;Diseasemutation;Disulfidebond;Glycoprotein;Lipidmetabolism;Lipidtransport;Polymorphism;Referenceproteome;Secreted;Signal;Steroidmetabolism;Sterolmetabolism;Transport	+			Control vs CFNT		Cholesteryl ester transfer protein	CETP	P11597	P11597	CETP_HUMAN	21	7496100000	432	0.0107286	0.0342301	2.93608
[truncated: 900 more rows]
[truncated: 11 more columns]

## Sheet: Feuil1
Gene_name	GSEA_Leading Genes
#!{Type}	Categorical
IGHV3-15	---
IGHV3-74	---
SLC5A10	---
A2ML1	---
IGLL5;IGLC1	---
KRT8	---
MYO1C	---
SNAP23	---
MASP2	---
RAB27B	---
PSMD11	---
CLIC1	---
UPK1A	---
SLC28A1	---
SULT1C2	---
EGFR	---
WASL	---
MANBA	---
AGRN	NABA_CORE_MATRISOME_No
SERPINB12	---
[truncated: 1,098 more rows]
