# Supplementary material for: Urinary Exosomes of Patients with Cystic Fibrosis Unravel CFTR-Related Renal Disease
Source: Int J Mol Sci. 2020 Sep 10;21(18):6625. doi: 10.3390/ijms21186625 (PMC7554933; doi:10.3390/ijms21186625)
Supplement: Supplementary file 1 [file ijms-21-06625-s001.zip › Supplementary table S3.xlsx]

## Sheet: GSEA_POS
NAME	SIZE	NES	NOM p-val	FDR q-val	LEADING_GENES
NABA_CORE_MATRISOME	33	3.4140284	0.0	0.0	CILP2,COL15A1,COL18A1,COL4A2,COL6A1,COL6A3,EFEMP1,EFEMP2,FBLN1,FGL2,FN1,HMCN1,HSPG2,IGFALS,LAMA5,LAMC1,LGI2,MXRA5,OMD,PCOLCE,THBS1,VWA1
REACTOME_ENDOSOMAL_SORTING_COMPLEX_REQUIRED_FOR_TRANSPORT_ESCRT	19	3.2366006	0.0	0.0	CHMP2A,CHMP2B,CHMP3,CHMP4A,CHMP4B,CHMP4C,CHMP5,CHMP6,SNF8,STAM2,TSG101,VPS25,VPS28,VPS36,VPS37B,VPS37D,VPS4A,VPS4B,VTA1
NABA_BASEMENT_MEMBRANES	11	2.624911	0.0	0.0014411892	AGRN,COL15A1,COL18A1,COL4A2,COL6A1,COL6A3,HMCN1,HSPG2,LAMA5,LAMC1,NID1
NABA_ECM_GLYCOPROTEINS	25	2.5484471	0.0	0.0019636075	CILP2,EFEMP1,EFEMP2,FBLN1,FGL2,FN1,HMCN1,IGFALS,LAMA5,LAMC1,LGI2,MXRA5,PCOLCE,THBS1,VWA1
NABA_MATRISOME	109	2.5203667	0.0	0.0020912564	ANGPTL1,CILP2,COL15A1,COL18A1,COL4A2,COL6A1,COL6A3,CSPG4,EFEMP1,EFEMP2,FBLN1,FGL2,FN1,FREM1,FREM2,GPC1,GPC3,GPC4,HMCN1,HSPG2,HTRA1,IGFALS,ITIH1,ITIH2,ITIH4,ITLN1,KNG1,LAMA5,LAMC1,LGI2,MEGF8,MXRA5,OMD,PAPPA2,PCOLCE,PLAU,PLOD1,PLXDC2,SERPINA4,SERPIND1,SERPINI1,THBS1,VWA1
REACTOME_POST_TRANSLATIONAL_PROTEIN_MODIFICATION	16	2.261632	0.0	0.013931477	ARSB,B3GNT2,B4GALT1,F2,GANAB,MAN1A1,MAN1C1,MAN2A1,MGAT1,MGAT5,MUC6,PDIA3,PROZ
KEGG_ENDOCYTOSIS	47	2.233612	0.001968504	0.013652341	ARF6,CDC42,CHMP1B,CHMP2A,CHMP2B,CHMP3,CHMP4A,CHMP4B,CHMP4C,CHMP5,CHMP6,EGF,EHD4,HSPA2,ITCH,NEDD4L,PARD6B,PDCD6IP,PRKCZ,RAB11FIP1,RAB11FIP5,RAB22A,RAB5B,RAB5C,SNF8,SRC,STAM2,STAMBP,TSG101,VPS25,VPS28,VPS36,VPS37B,VPS37D,VPS4A,VPS4B,VTA1
KEGG_CHEMOKINE_SIGNALING_PATHWAY	18	2.1993191	0.0019455253	0.015375508	CDC42,GNAI1,GNAI2,GNAI3,GNB1,GNB2,GNG12,GRB2,GSK3B,KRAS,LYN,MAPK1,NRAS,PRKCZ,RAP1B,RHOA,VAV3
KEGG_ECM_RECEPTOR_INTERACTION	15	2.1950436	0.0	0.014031074	AGRN,COL4A2,COL6A1,COL6A3,DAG1,FN1,GP5,HSPG2,LAMA5,LAMC1,THBS1
REACTOME_SIGNALING_BY_PDGF	12	2.0565512	0.008385744	0.034117486	COL4A2,COL6A1,COL6A3,GRB2,KRAS,MAPK1,NRAS,PLG,PRKAR2A,SRC,THBS1,YWHAB
REACTOME_INSULIN_RECEPTOR_SIGNALLING_CASCADE	11	1.9679873	0.0039525693	0.051990483	CAB39,CAB39L,GRB2,KL,KRAS,MAPK1,NRAS,PRKAG1,STK11,STRADB,YWHAB
REACTOME_HEMOSTASIS	79	1.9618767	0.009823183	0.049701877	A2M,ACTN1,ATP1B1,BSG,CAP1,CAPZA1,CAPZA2,CD9,CDC42,CFL1,CLU,EGF,EHD1,F11,F2,FGB,FGG,FN1,GNA11,GNA13,GNAI1,GNAI2,GNAI3,GNAQ,GNAS,GNB1,GNB2,GNG12,GP5,GRB2,HBB,HRG,ITGAV,KIF3B,KIF5B,KIFAP3,KNG1,KRAS,LAMP2,LYN,MAPK1,MGLL,NRAS,PFN1,PLAU,PLG,PPIA,PPP2R1A,PRKAR2A,PRKCZ,PSAP,RAB5A,RAP1B,RAPGEF3,RHOA,RHOG,SERPINC1,SERPINF2,SERPING1,SLC3A2,SLC7A8,SRC,THBS1,TLN1,VAV3,VCL,WDR1,YES1,YWHAZ
KEGG_NEUROTROPHIN_SIGNALING_PATHWAY	17	1.9092159	0.02	0.061441828	ARHGDIA,ARHGDIB,CDC42,GRB2,GSK3B,KRAS,MAPK1,NRAS,RAP1B,RHOA,SORT1,YWHAB,YWHAE,YWHAG,YWHAH,YWHAQ,YWHAZ
REACTOME_GPCR_DOWNSTREAM_SIGNALING	24	1.8835156	0.0020876827	0.06636712	AGT,C3,C5,CDC42,F2,GNA11,GNA13,GNAI1,GNAI2,GNAI3,GNAS,GNB1,GNB2,GNG12,HEBP1,KNG1,MGLL,PDE8A,PDE8B,RHOA,RHOG,VAV3
KEGG_COMPLEMENT_AND_COAGULATION_CASCADES	30	1.8632699	0.018691588	0.070290744	A2M,C1QC,C1R,C3,C4BPA,C5,C7,C8B,C8G,CD59,CFB,CFI,CR1,F11,F2,FGB,FGG,KNG1,MASP2,PLAU,PLG,SERPINA5,SERPINC1,SERPIND1,SERPINF2
REACTOME_NCAM_SIGNALING_FOR_NEURITE_OUT_GROWTH	10	1.8630428	0.010141988	0.06589757	AGRN,COL4A2,COL6A1,COL6A3,GRB2,KRAS,MAPK1,NRAS,SRC,YWHAB
REACTOME_GLYCOSAMINOGLYCAN_METABOLISM	20	1.8583554	0.008179959	0.063988164	AGRN,ARSB,B3GNT2,B4GALT1,CSPG4,GPC1,GPC3,GPC4,HS6ST2,HSPG2,HYAL1,OMD,ST3GAL6
REACTOME_SIGNALING_BY_GPCR	34	1.8281099	0.003944773	0.070554346	AGT,ANXA1,C3,C5,CDC42,F2,GNA11,GNA13,GNAI1,GNAI2,GNAI3,GNAQ,GNAS,GNB1,GNB2,GNG12,GRB2,HEBP1,KNG1,KRAS,MAPK1,MGLL,NRAS,PDE8A,PDE8B,PPP1CA,PPP2R1A,PRKAR2A,RHOA,RHOG,SMO,VAV3,YWHAB
PID_INTEGRIN1_PATHWAY	19	1.8264318	0.009823183	0.06733303	CD14,COL18A1,COL6A1,COL6A3,CSPG4,FN1,LAMA5,LAMC1,PLAU,THBS1
REACTOME_EXTRACELLULAR_MATRIX_ORGANIZATION	10	1.7700478	0.02296451	0.087765135	COL15A1,COL4A2,COL6A1,COL6A3,PCOLCE,PLOD1

## Sheet: GSEA_NEG
NAME	SIZE	NES	NOM p-val	FDR q-val	LEADING_GENES
REACTOME_METABOLISM_OF_AMINO_ACIDS_AND_DERIVATIVES	42	-3.935727	0.0	0.0	AHCY,ALDH7A1,ALDH9A1,ARG1,ASL,ASS1,BBOX1,BHMT,CNDP2,DDC,FTCD,GLUL,GOT1,GRHPR,HGD,HPD,PSAT1,PSMA1,PSMA2,PSMA3,PSMA4,PSMA5,PSMA6,PSMB1,PSMB2,PSMB3,PSMB5,PSMB6,PSMB8,PSMD3,SHMT1
REACTOME_CLASS_I_MHC_MEDIATED_ANTIGEN_PROCESSING_PRESENTATION	26	-3.1564975	0.0	0.0	BLMH,CANX,HLA-A,HLA-C,HSPA5,NPEPPS,PSMA1,PSMA2,PSMA3,PSMA4,PSMA5,PSMA6,PSMB1,PSMB2,PSMB3,PSMB5,PSMB6,PSMB8,PSMD3
REACTOME_ANTIGEN_PROCESSING_UBIQUITINATION_PROTEASOME_DEGRADATION	20	-2.9212883	0.0	0.0	BLMH,NPEPPS,PSMA1,PSMA2,PSMA3,PSMA4,PSMA5,PSMA6,PSMB1,PSMB2,PSMB3,PSMB5,PSMB6,PSMB8,PSMD3
REACTOME_ER_PHAGOSOME_PATHWAY	20	-2.9075518	0.0	0.0	HLA-A,HLA-C,PSMA1,PSMA2,PSMA3,PSMA4,PSMA5,PSMA6,PSMB1,PSMB2,PSMB3,PSMB5,PSMB6,PSMB8,PSMD3
REACTOME_REGULATION_OF_ORNITHINE_DECARBOXYLASE_ODC	17	-2.8204412	0.0	4.9851194E-4	PSMA1,PSMA2,PSMA3,PSMA4,PSMA5,PSMA6,PSMB1,PSMB3,PSMB5,PSMB6,PSMB8
REACTOME_REGULATION_OF_MITOTIC_CELL_CYCLE	17	-2.794398	0.0	4.154266E-4	PSMA1,PSMA2,PSMA3,PSMA4,PSMA5,PSMA6,PSMB1,PSMB3,PSMB5,PSMB6,PSMB8
REACTOME_ANTIGEN_PROCESSING_CROSS_PRESENTATION	21	-2.790075	0.0	3.5607992E-4	HLA-A,HLA-C,PSMA1,PSMA2,PSMA3,PSMA4,PSMA5,PSMA6,PSMB1,PSMB2,PSMB3,PSMB5,PSMB6,PSMB8
REACTOME_S_PHASE	17	-2.7840095	0.0	4.4984426E-4	PSMA1,PSMA2,PSMA3,PSMA4,PSMA5,PSMA6,PSMB1,PSMB3,PSMB5,PSMB6,PSMB8
REACTOME_ACTIVATION_OF_NF_KAPPAB_IN_B_CELLS	17	-2.7787588	0.0	3.998616E-4	PSMA1,PSMA2,PSMA3,PSMA4,PSMA5,PSMA6,PSMB1,PSMB3,PSMB5,PSMB6,PSMB8
REACTOME_SYNTHESIS_OF_DNA	17	-2.7768457	0.0	3.5987544E-4	PSMA1,PSMA2,PSMA3,PSMA4,PSMA5,PSMA6,PSMB1,PSMB3,PSMB5,PSMB6,PSMB8
REACTOME_AUTODEGRADATION_OF_CDH1_BY_CDH1_APC_C	17	-2.7751367	0.0	3.2715948E-4	PSMA1,PSMA2,PSMA3,PSMA4,PSMA5,PSMA6,PSMB1,PSMB3,PSMB5,PSMB6,PSMB8
REACTOME_CDT1_ASSOCIATION_WITH_THE_CDC6_ORC_ORIGIN_COMPLEX	17	-2.7672675	0.0	2.998962E-4	PSMA1,PSMA2,PSMA3,PSMA4,PSMA5,PSMA6,PSMB1,PSMB3,PSMB5,PSMB6,PSMB8
REACTOME_SCF_BETA_TRCP_MEDIATED_DEGRADATION_OF_EMI1	17	-2.7645957	0.0	2.7682725E-4	PSMA1,PSMA2,PSMA3,PSMA4,PSMA5,PSMA6,PSMB1,PSMB3,PSMB5,PSMB6,PSMB8
REACTOME_ASSEMBLY_OF_THE_PRE_REPLICATIVE_COMPLEX	17	-2.7598057	0.0	2.5705388E-4	PSMA1,PSMA2,PSMA3,PSMA4,PSMA5,PSMA6,PSMB1,PSMB3,PSMB5,PSMB6,PSMB8
REACTOME_AUTODEGRADATION_OF_THE_E3_UBIQUITIN_LIGASE_COP1	17	-2.7549343	0.0	2.3991696E-4	PSMA1,PSMA2,PSMA3,PSMA4,PSMA5,PSMA6,PSMB1,PSMB3,PSMB5,PSMB6,PSMB8
KEGG_GLYCOLYSIS_GLUCONEOGENESIS	23	-2.7516448	0.0	2.2492213E-4	ADH5,AKR1A1,ALDH7A1,ALDH9A1,ALDOA,ALDOB,ENO1,FBP1,GALM,GAPDH,GPI,LDHA,LDHB,PCK1,PFKL,PGAM1,PGK1,PGM1,PGM2,PKLR,TPI1
REACTOME_APC_C_CDH1_MEDIATED_DEGRADATION_OF_CDC20_AND_OTHER_APC_C_CDH1_TARGETED_PROTEINS_IN_LATE_MITOSIS_EARLY_G1	17	-2.7469256	0.0	2.1169143E-4	PSMA1,PSMA2,PSMA3,PSMA4,PSMA5,PSMA6,PSMB1,PSMB3,PSMB5,PSMB6,PSMB8
REACTOME_M_G1_TRANSITION	17	-2.7447925	0.0	1.999308E-4	PSMA1,PSMA2,PSMA3,PSMA4,PSMA5,PSMA6,PSMB1,PSMB3,PSMB5,PSMB6,PSMB8
KEGG_PROTEASOME	17	-2.7405174	0.0	1.8940814E-4	PSMA1,PSMA2,PSMA3,PSMA4,PSMA5,PSMA6,PSMB1,PSMB3,PSMB5,PSMB6,PSMB8
BIOCARTA_PROTEASOME_PATHWAY	15	-2.739271	0.0	1.7993772E-4	PSMA1,PSMA2,PSMA3,PSMA4,PSMA5,PSMA6,PSMB1,PSMB3,PSMB5,PSMB6
REACTOME_ORC1_REMOVAL_FROM_CHROMATIN	17	-2.7357883	0.0	1.7136926E-4	PSMA1,PSMA2,PSMA3,PSMA4,PSMA5,PSMA6,PSMB1,PSMB3,PSMB5,PSMB6,PSMB8
REACTOME_P53_INDEPENDENT_G1_S_DNA_DAMAGE_CHECKPOINT	17	-2.7317858	0.0	1.6357974E-4	PSMA1,PSMA2,PSMA3,PSMA4,PSMA5,PSMA6,PSMB1,PSMB3,PSMB5,PSMB6,PSMB8
REACTOME_CDK_MEDIATED_PHOSPHORYLATION_AND_REMOVAL_OF_CDC6	17	-2.7300406	0.0	1.5646758E-4	PSMA1,PSMA2,PSMA3,PSMA4,PSMA5,PSMA6,PSMB1,PSMB3,PSMB5,PSMB6,PSMB8
REACTOME_SCFSKP2_MEDIATED_DEGRADATION_OF_P27_P21	17	-2.7278175	0.0	1.499481E-4	PSMA1,PSMA2,PSMA3,PSMA4,PSMA5,PSMA6,PSMB1,PSMB3,PSMB5,PSMB6,PSMB8
REACTOME_CROSS_PRESENTATION_OF_SOLUBLE_EXOGENOUS_ANTIGENS_ENDOSOMES	17	-2.7114813	0.0	1.4395016E-4	PSMA1,PSMA2,PSMA3,PSMA4,PSMA5,PSMA6,PSMB1,PSMB3,PSMB5,PSMB6,PSMB8
REACTOME_CELL_CYCLE_CHECKPOINTS	17	-2.7053785	0.0	1.3841363E-4	PSMA1,PSMA2,PSMA3,PSMA4,PSMA5,PSMA6,PSMB1,PSMB3,PSMB5,PSMB6,PSMB8
REACTOME_VIF_MEDIATED_DEGRADATION_OF_APOBEC3G	17	-2.6903553	0.0	1.3328719E-4	PSMA1,PSMA2,PSMA3,PSMA4,PSMA5,PSMA6,PSMB1,PSMB3,PSMB5,PSMB6,PSMB8
REACTOME_CYCLIN_E_ASSOCIATED_EVENTS_DURING_G1_S_TRANSITION_	17	-2.6878855	0.0	1.698629E-4	PSMA1,PSMA2,PSMA3,PSMA4,PSMA5,PSMA6,PSMB1,PSMB3,PSMB5,PSMB6,PSMB8
REACTOME_P53_DEPENDENT_G1_DNA_DAMAGE_RESPONSE	17	-2.6868162	0.0	1.6400557E-4	PSMA1,PSMA2,PSMA3,PSMA4,PSMA5,PSMA6,PSMB1,PSMB3,PSMB5,PSMB6,PSMB8
REACTOME_APC_C_CDC20_MEDIATED_DEGRADATION_OF_MITOTIC_PROTEINS	17	-2.659685	0.0	1.9676505E-4	PSMA1,PSMA2,PSMA3,PSMA4,PSMA5,PSMA6,PSMB1,PSMB3,PSMB5,PSMB6,PSMB8
REACTOME_APOPTOSIS	26	-2.6596503	0.0	1.9041778E-4	DSG1,DSP,LMNA,PSMA1,PSMA2,PSMA3,PSMA4,PSMA5,PSMA6,PSMB1,PSMB3,PSMB5,PSMB6,PSMB8
REACTOME_G1_S_TRANSITION	18	-2.6313348	0.0	2.2166959E-4	PSMA1,PSMA2,PSMA3,PSMA4,PSMA5,PSMA6,PSMB1,PSMB3,PSMB5,PSMB6,PSMB8
REACTOME_MITOTIC_G1_G1_S_PHASES	18	-2.6222553	0.0	2.1495234E-4	PSMA1,PSMA2,PSMA3,PSMA4,PSMA5,PSMA6,PSMB1,PSMB3,PSMB5,PSMB6,PSMB8
REACTOME_REGULATION_OF_APOPTOSIS	18	-2.6197352	0.0	2.086302E-4	PSMA1,PSMA2,PSMA3,PSMA4,PSMA5,PSMA6,PSMB1,PSMB3,PSMB5,PSMB6,PSMB8
REACTOME_SIGNALING_BY_WNT	18	-2.6109936	0.0	2.0266934E-4	PSMA1,PSMA2,PSMA3,PSMA4,PSMA5,PSMA6,PSMB1,PSMB3,PSMB5,PSMB6,PSMB8
REACTOME_HOST_INTERACTIONS_OF_HIV_FACTORS	23	-2.5515304	0.0	4.8278098E-4	ATP6V1H,HLA-A,PSMA1,PSMA2,PSMA3,PSMA4,PSMA5,PSMA6,PSMB1,PSMB2,PSMB3,PSMB5,PSMB6,PSMB8
REACTOME_DESTABILIZATION_OF_MRNA_BY_AUF1_HNRNP_D0	19	-2.532082	0.0	4.6973283E-4	PSMA1,PSMA2,PSMA3,PSMA4,PSMA5,PSMA6,PSMB1,PSMB3,PSMB5,PSMB6,PSMB8
REACTOME_DNA_REPLICATION	19	-2.5300658	0.0	4.5737144E-4	PSMA1,PSMA2,PSMA3,PSMA4,PSMA5,PSMA6,PSMB1,PSMB3,PSMB5,PSMB6,PSMB8
REACTOME_DOWNSTREAM_SIGNALING_EVENTS_OF_B_CELL_RECEPTOR_BCR	19	-2.5288687	0.0	4.4564396E-4	PSMA1,PSMA2,PSMA3,PSMA4,PSMA5,PSMA6,PSMB1,PSMB3,PSMB5,PSMB6,PSMB8
REACTOME_MITOTIC_M_M_G1_PHASES	19	-2.5281699	0.0	4.3450287E-4	PSMA1,PSMA2,PSMA3,PSMA4,PSMA5,PSMA6,PSMB1,PSMB3,PSMB5,PSMB6,PSMB8
REACTOME_CELL_CYCLE	28	-2.4801674	0.001980198	4.791422E-4	DYNC1H1,HIST1H4A,HSP90AA1,LMNA,PPP2R1A,PSMA1,PSMA2,PSMA3,PSMA4,PSMA5,PSMA6,PSMB1,PSMB2,PSMB3,PSMB4,PSMB5,PSMB6,PSMB8,PSMD3,TUBB,TUBB4B,YWHAE,YWHAG
REACTOME_METABOLISM_OF_MRNA	27	-2.407603	0.0018315018	9.109197E-4	EIF4A1,HSPA8,HSPB1,PPP2R1A,PSMA1,PSMA2,PSMA3,PSMA4,PSMA5,PSMA6,PSMB1,PSMB2,PSMB3,PSMB4,PSMB5,PSMB6,PSMB8,PSMC2,PSMD3,RPL7,RPS20,RPS3,RPSA,YWHAZ
REACTOME_CELL_CYCLE_MITOTIC	25	-2.395398	0.002016129	9.421517E-4	DYNC1H1,HSP90AA1,PPP2R1A,PSMA1,PSMA2,PSMA3,PSMA4,PSMA5,PSMA6,PSMB1,PSMB2,PSMB3,PSMB4,PSMB5,PSMB6,PSMB8,PSMD3,TUBB,TUBB4B,YWHAE,YWHAG
REACTOME_METABOLISM_OF_RNA	27	-2.371368	0.0	0.0011333205	EIF4A1,HSPA8,HSPB1,PPP2R1A,PSMA1,PSMA2,PSMA3,PSMA4,PSMA5,PSMA6,PSMB1,PSMB2,PSMB3,PSMB4,PSMB5,PSMB6,PSMB8,PSMC2,PSMD3,RPL7,RPS20,RPS3,RPSA,YWHAZ
REACTOME_GLUCONEOGENESIS	12	-2.3705785	0.0	0.0011081356	ALDOA,ALDOB,ENO1,FBP1,GAPDH,GOT1,GPI,MDH1,PCK1,PGAM1,PGK1,TPI1
REACTOME_SIGNALING_BY_THE_B_CELL_RECEPTOR_BCR	21	-2.3382862	0.0	0.0014764619	PSMA1,PSMA2,PSMA3,PSMA4,PSMA5,PSMA6,PSMB1,PSMB3,PSMB5,PSMB6,PSMB8
REACTOME_REGULATION_OF_MRNA_STABILITY_BY_PROTEINS_THAT_BIND_AU_RICH_ELEMENTS	21	-2.3031607	0.004149378	0.0018086471	PSMA1,PSMA2,PSMA3,PSMA4,PSMA5,PSMA6,PSMB1,PSMB3,PSMB5,PSMB6,PSMB8
REACTOME_IRON_UPTAKE_AND_TRANSPORT	16	-2.2388566	0.002004008	0.0026990438	ATP6V0D1,ATP6V0D2,ATP6V1A,ATP6V1B1,ATP6V1B2,ATP6V1C1,ATP6V1H,CP,FTH1,FTL,TF,TFRC
REACTOME_HIV_INFECTION	27	-2.2167313	0.0020325202	0.003267645	ATP6V1H,HLA-A,PSMA1,PSMA2,PSMA3,PSMA4,PSMA5,PSMA6,PSMB1,PSMB2,PSMB3,PSMB5,PSMB6,PSMB8
KEGG_ARGININE_AND_PROLINE_METABOLISM	12	-2.2053947	0.006263048	0.0034387782	ACY1,ALDH7A1,ALDH9A1,ARG1,ASL,ASS1,GLUL,GOT1,LAP3
REACTOME_GLUCOSE_METABOLISM	22	-2.168265	0.0	0.004317289	ALDOA,ALDOB,ENO1,FBP1,GAPDH,GOT1,GPI,MDH1,PCK1,PFKL,PGAM1,PGK1,PGM1,PGM2,PKLR,PPP2R1A,TPI1,UGP2
REACTOME_TRANSFERRIN_ENDOCYTOSIS_AND_RECYCLING	12	-2.1306767	0.0	0.004956537	ATP6V0A4,ATP6V0D1,ATP6V0D2,ATP6V1A,ATP6V1B1,ATP6V1B2,ATP6V1C1,ATP6V1E1,ATP6V1H,TF,TFRC
REACTOME_TRANSMEMBRANE_TRANSPORT_OF_SMALL_MOLECULES	59	-2.1131291	0.0040816325	0.005445676	ABCB1,APOA1,AQP1,AQP2,ATP12A,ATP1A1,ATP1B1,ATP6V0A4,ATP6V0D1,ATP6V0D2,ATP6V1A,ATP6V1B1,ATP6V1B2,ATP6V1C1,ATP6V1D,ATP6V1E1,ATP6V1H,ATP8B1,CP,FTH1,FTL,GNAS,GNB2,GNG12,RHCG,SLC12A1,SLC13A2,SLC13A3,SLC17A5,SLC1A1,SLC1A5,SLC22A11,SLC22A2,SLC22A8,SLC28A1,SLC34A1,SLC36A2,SLC3A1,SLC3A2,SLC44A1,SLC44A2,SLC44A4,SLC47A1,SLC4A4,SLC5A2,SLC5A8,SLC6A19,SLC7A8,SLCO4C1,TF,TFRC
REACTOME_ADAPTIVE_IMMUNE_SYSTEM	55	-2.1065295	0.004158004	0.0056183925	BLMH,CANX,CLTC,CTSB,CTSC,CTSD,CTSH,DNM2,DYNC1H1,HLA-A,HLA-C,HSPA5,ITGAV,ITGB1,NPEPPS,PPP2R1A,PSMA1,PSMA2,PSMA3,PSMA4,PSMA5,PSMA6,PSMB1,PSMB2,PSMB3,PSMB5,PSMB6,PSMB8,PSMD3,RAB7A,YES1
KEGG_PYRUVATE_METABOLISM	10	-2.1053252	0.004016064	0.00555662	ALDH7A1,ALDH9A1,GRHPR,LDHA,LDHB,MDH1,PCK1,PKLR
PID_HIF1_TFPATHWAY	12	-2.06179	0.002004008	0.0072817076	ABCB1,ALDOA,CP,ENO1,LDHA,PFKL,PGK1,PGM1,TF,TFRC
REACTOME_GLYCOLYSIS	12	-2.0352693	0.001980198	0.008527583	ALDOA,ALDOB,ENO1,GAPDH,GPI,PFKL,PGAM1,PGK1,PKLR,PPP2R1A,TPI1
KEGG_AMINO_SUGAR_AND_NUCLEOTIDE_SUGAR_METABOLISM	12	-2.0043063	0.0020491802	0.010523079	GALK1,GNPDA1,HEXA,HEXB,NAGK,PGM1,PGM2,RENBP,UGDH,UGP2
KEGG_ANTIGEN_PROCESSING_AND_PRESENTATION	13	-1.9801795	0.01026694	0.011966454	CANX,CTSB,HLA-A,HLA-C,HLA-DRA,HSP90AA1,HSP90AB1,HSPA4,HSPA5,HSPA6,HSPA8
KEGG_VIBRIO_CHOLERAE_INFECTION	13	-1.9435165	0.012	0.015411632	ATP6AP1,ATP6V0A1,ATP6V0A4,ATP6V0D1,ATP6V0D2,ATP6V1A,ATP6V1B1,ATP6V1B2,ATP6V1C1,ATP6V1D,ATP6V1E1,ATP6V1H,GNAS
KEGG_LYSOSOME	51	-1.8916636	0.01183432	0.02055491	ACP2,ARSA,ASAH1,ATP6AP1,ATP6V0A1,ATP6V0A4,ATP6V0D1,ATP6V0D2,ATP6V1H,CD63,CLTC,CTSA,CTSB,CTSC,CTSD,CTSH,CTSZ,FUCA1,GAA,GALC,GALNS,GBA,GLA,GLB1,GUSB,HEXA,HEXB,IGF2R,LAMP1,MAN2B1,MANBA,NAGLU,NAPSA,NPC1,PSAP,SCARB2,SLC17A5,TPP1
REACTOME_INSULIN_RECEPTOR_RECYCLING	10	-1.8452337	0.015841585	0.026742725	ATP6V0A4,ATP6V0D1,ATP6V0D2,ATP6V1A,ATP6V1B1,ATP6V1B2,ATP6V1C1,ATP6V1E1,ATP6V1H
PID_RAC1_PATHWAY	12	-1.8313272	0.015968064	0.028135512	ABI1,ACTR2,ACTR3,ARHGDIA,ARPC1B,ARPC2,ARPC4,BAIAP2,CFL1,CYFIP2,IQGAP1,NCKAP1
KEGG_OXIDATIVE_PHOSPHORYLATION	17	-1.8200263	0.02414487	0.029239329	ATP5A1,ATP5B,ATP6AP1,ATP6V0A1,ATP6V0D1,ATP6V0D2,ATP6V1A,ATP6V1B1,ATP6V1B2,ATP6V1C1,ATP6V1H
KEGG_OTHER_GLYCAN_DEGRADATION	10	-1.772669	0.016701462	0.036531582	FUCA1,FUCA2,GBA,GLB1,HEXA,HEXB,MAN2B1,MAN2B2,MANBA
KEGG_EPITHELIAL_CELL_SIGNALING_IN_HELICOBACTER_PYLORI_INFECTION	17	-1.7703736	0.0116054155	0.03638896	ATP6AP1,ATP6V0A1,ATP6V0A4,ATP6V0D1,ATP6V0D2,ATP6V1A,ATP6V1B1,ATP6V1B2,ATP6V1C1,ATP6V1D,ATP6V1E1,ATP6V1H,CDC42,EGFR,SRC
PID_PDGFRB_PATHWAY	39	-1.6861408	0.020120725	0.055666655	ABI1,ACTN4,ACTR2,ACTR3,ARHGDIA,ARPC1B,ARPC2,ARPC4,BAIAP2,CYFIP2,DNM2,EPS8,GRB2,IQGAP1,ITGAV,MAPK1,NCKAP1,NRAS,PPP2R1A,PTPRJ,RAB5A,RAP1B,SLC9A3R1,SLC9A3R2,SRC,WASL,YES1,YWHAB,YWHAE,YWHAG,YWHAH,YWHAZ
PID_MYC_ACTIV_PATHWAY	12	-1.6588857	0.033932135	0.062114473	EIF4A1,ENO1,GAPDH,HSP90AA1,HSPA4,HSPD1,LDHA,SHMT1,TFRC
PID_ERBB1_DOWNSTREAM_PATHWAY	34	-1.6523316	0.031007752	0.063240975	ABI1,ACTR2,ACTR3,ARPC1B,ARPC2,ARPC4,BAIAP2,CAPN2,CDC42,CYFIP2,EGFR,EPS8,GRB2,IQGAP1,MAPK1,NCKAP1,NRAS,PPP2R1A,PRKCZ,RAB5A,RALA,SRC,WASL,YWHAB,YWHAE,YWHAG,YWHAH,YWHAZ
REACTOME_LATENT_INFECTION_OF_HOMO_SAPIENS_WITH_MYCOBACTERIUM_TUBERCULOSIS	11	-1.6390675	0.03292181	0.06685675	ATP6V0A4,ATP6V0D1,ATP6V0D2,ATP6V1A,ATP6V1B1,ATP6V1B2,ATP6V1C1,ATP6V1E1,ATP6V1H
PID_CDC42_PATHWAY	18	-1.5649028	0.05882353	0.09360478	ACTR2,ACTR3,ARHGDIA,ARPC1B,ARPC2,ARPC4,BAIAP2,CDC42,CFL1,EPS8,IQGAP1,PRKCZ,SRC,WASL,YES1
REACTOME_MHC_CLASS_II_ANTIGEN_PRESENTATION	14	-1.5573065	0.04483431	0.0957963	CANX,CLTC,CTSB,CTSC,CTSD,CTSH,DNM2,DYNC1H1,RAB7A
REACTOME_PROTEIN_FOLDING	11	-1.5568624	0.062378168	0.09469213	CCT2,CCT3,CCT4,CCT6A,CCT7,CCT8,TCP1,TUBA1B,TUBB4B
REACTOME_FORMATION_OF_TUBULIN_FOLDING_INTERMEDIATES_BY_CCT_TRIC	11	-1.5445323	0.06560636	0.09899758	CCT2,CCT3,CCT4,CCT6A,CCT7,CCT8,TCP1,TUBA1B,TUBB4B
