# Supplementary material for: Urinary Exosomes of Patients with Cystic Fibrosis Unravel CFTR-Related Renal Disease
Source: Int J Mol Sci. 2020 Sep 10;21(18):6625. doi: 10.3390/ijms21186625 (PMC7554933; doi:10.3390/ijms21186625)
Supplement: Supplementary file 1 [file ijms-21-06625-s001.zip › Supplemetary table S1.xlsx]

## Sheet: Supplemetary Table 1
Pellet200kg	Sucrose density gradient fractions intensity
	F1	F2	F3	F4	F5	F6	F7	N: Peptides	N: Razor + unique peptides	N: Unique peptides	N: Sequence coverage [%]	N: Unique + razor sequence coverage [%]	N: Unique sequence coverage [%]	N: Mol. weight [kDa]	N: Q-value	N: Score	N: Intensity	N: MS/MS count	T: Gene names	T: Protein IDs	T: Protein names	T: Majority protein IDs
35.4718	NaN	NaN	21.7026	32.9834	32.6941	28.9051	25.723	117	117	117	29	29	29	521.95	0	323.31	63652000000	444	LRP2	P98164	Low-density lipoprotein receptor-related protein 2	P98164
35.5737	NaN	NaN	20.9161	32.9558	32.773	29.5436	26.2141	81	81	81	29.9	29.9	29.9	398.73	0	323.31	67671000000	321	CUBN	O60494	Cubilin	O60494
36.2468	NaN	NaN	24.9279	33.7613	33.617	30.0837	27.531	46	46	46	39.9	39.9	39.9	133.99	0	323.31	110640000000	252	EGF	P01133	Pro-epidermal growth factor;Epidermal growth factor	P01133
36.0675	NaN	NaN	24.958	33.8213	32.8656	29.2924	26.8986	33	33	33	42.2	42.2	42.2	71.957	0	323.31	95829000000	181	KNG1	P01042	Kininogen-1;Kininogen-1 heavy chain;T-kinin;Bradykinin;Lysyl-bradykinin;Kininogen-1 light chain;Low molecular weight growth-promoting factor	P01042
34.8386	NaN	NaN	21.3295	33.5858	30.1719	26.4853	23.7703	42	42	42	45	45	45	109.54	0	323.31	44936000000	181	ANPEP	P15144	Aminopeptidase N	P15144
35.6383	NaN	NaN	24.1745	33.9765	33.2063	29.5883	26.9842	23	23	23	35	35	35	69.76	0	323.31	81252000000	152	UMOD	P07911	Uromodulin;Uromodulin, secreted form	P07911
35.1957	19.9061	NaN	27.0791	33.0787	32.5345	29.3412	27	16	16	10	62.6	62.6	42.2	37.654	0	323.31	55601000000	126	IGHA1	P01876	Ig alpha-1 chain C region	P01876
34.9171	NaN	NaN	22.6459	32.7914	31.6886	27.9655	24.8953	21	21	21	46	46	46	65.33	0	323.31	43636000000	105	LGALS3BP	Q08380	Galectin-3-binding protein	Q08380
32.8273	NaN	NaN	NaN	30.7891	27.9261	24.4096	NaN	32	32	32	45.1	45.1	45.1	85.513	0	323.31	9753500000	93	MME	P08473	Neprilysin	P08473
33.0316	24.701	23.1632	24.3253	30.1978	29.2019	26.8628	24.3952	16	16	1	56	56	4.5	41.736	0	323.31	10831000000	93	ACTB	P60709;Q6S8J3;A5A3E0;P0CG38;Q9BYX7;Q562R1;P0CG39	Actin, cytoplasmic 1;Actin, cytoplasmic 1, N-terminally processed	P60709
30.9347	NaN	NaN	NaN	27.9581	27.833	22.8619	NaN	39	39	32	27.1	27.1	23.7	187.15	0	323.31	2559900000	89	C3	P01024	Complement C3;Complement C3 beta chain;C3-beta-c;Complement C3 alpha chain;C3a anaphylatoxin;Acylation stimulating protein;Complement C3b alpha chain;Complement C3c alpha chain fragment 1;Complement C3dg fragment;Complement C3g fragment;Complement C3d fragment;Complement C3f fragment;Complement C3c alpha chain fragment 2	P01024
32.9075	NaN	NaN	NaN	30.4585	29.6327	25.899	22.1004	23	23	23	29.3	29.3	29.3	108.53	0	323.31	10432000000	89	COL6A1	P12109	Collagen alpha-1(VI) chain	P12109
34.2248	NaN	NaN	20.6135	32.0774	30.6439	26.7336	23.6706	18	18	18	45	45	45	46.736	0	323.31	26412000000	86	SERPINA1	P01009	Alpha-1-antitrypsin;Short peptide from AAT	P01009
33.8288	NaN	NaN	NaN	31.4794	30.5779	26.067	22.3341	20	20	20	34.4	34.4	34.4	83.283	0	323.31	19929000000	79	PIGR	P01833	Polymeric immunoglobulin receptor;Secretory component	P01833
31.8403	NaN	NaN	NaN	30.8515	26.5072	22.0052	NaN	32	32	32	46	46	46	96.022	0	323.31	5882000000	76	PDCD6IP	Q8WUM4	Programmed cell death 6-interacting protein	Q8WUM4
31.5781	NaN	NaN	NaN	28.339	27.5555	23.5148	20.5667	36	36	2	25.6	25.6	2.3	192.75	0	323.31	3756300000	72	C4B	P0C0L5	Complement C4-B;Complement C4 beta chain;Complement C4-B alpha chain;C4a anaphylatoxin;C4b-B;C4d-B;Complement C4 gamma chain	P0C0L5
33.6631	NaN	NaN	22.766	31.5674	30.5892	27.0691	24.2717	15	15	15	31.4	31.4	31.4	52.494	0	323.31	18568000000	72	CLU	P10909	Clusterin;Clusterin beta chain;Clusterin alpha chain	P10909
28.5695	26.3748	25.75	24.8042	24.4442	25.5729	28.6202	24.5968	16	16	16	17.3	17.3	17.3	113.75	0	201.06	1081800000	72	DSG1	Q02413	Desmoglein-1	Q02413
33.5509	NaN	NaN	NaN	30.7484	29.8632	26.7264	23.7352	14	14	14	35.2	35.2	35.2	45.674	0	323.31	15489000000	71	SERPINA5	P05154;G3V5I3	Plasma serine protease inhibitor	P05154
30.0855	NaN	NaN	NaN	26.9408	26.9728	NaN	NaN	43	43	43	18.3	18.3	18.3	351.15	0	323.31	1399900000	71	FREM2	Q5SZK8	FRAS1-related extracellular matrix protein 2	Q5SZK8
33.652	NaN	NaN	19.9635	31.0698	30.1654	26.5273	24.0439	11	11	11	24.4	24.4	24.4	55.154	0	209.36	17071000000	67	SERPING1	P05155	Plasma protease C1 inhibitor	P05155
32.1403	NaN	NaN	21.4416	29.7801	28.2154	25.1562	23.2942	21	21	3	56	56	8	57.767	0	323.31	6017700000	66	AMY1A	P04745	Alpha-amylase 1	P04745
27.3103	26.605	25.5048	25.4833	25.7659	26.6983	27.3708	25.4885	23	23	23	8.8	8.8	8.8	331.77	0	172.4	749590000	65	DSP	P15924	Desmoplakin	P15924
34.4628	NaN	NaN	24.7651	32.0597	30.727	27.7381	25.384	6	6	6	80.4	80.4	80.4	11.765	0	323.31	30228000000	64	IGKC	P01834	Ig kappa chain C region	P01834
31.3397	NaN	NaN	NaN	30.0615	24.1558	NaN	NaN	28	28	28	41.5	41.5	41.5	92.651	0	311.46	3857000000	64	CAPN7	Q9Y6W3	Calpain-7	Q9Y6W3
32.9345	NaN	NaN	NaN	29.5811	29.4969	26.4408	23.195	18	18	18	28.9	28.9	28.9	72.968	0	323.31	9869900000	62	MAN1A1	P33908;O60476	Mannosyl-oligosaccharide 1,2-alpha-mannosidase IA	P33908
32.6227	NaN	NaN	NaN	30.7781	29.6642	25.6836	21.6074	11	11	11	31	31	31	44.743	0	263.71	9362300000	59	PROZ	P22891	Vitamin K-dependent protein Z	P22891
30.8609	NaN	NaN	NaN	28.0462	27.975	22.7971	NaN	25	25	23	39.4	39.4	37.2	77.063	0	286.8	2498400000	56	TF	P02787	Serotransferrin	P02787
30.776	NaN	NaN	NaN	28.3377	27.4959	23.6816	NaN	19	19	19	63.1	63.1	63.1	36.154	0	283.27	2380600000	55	APOE	P02649;CON__Q03247	Apolipoprotein E	P02649
31.1165	NaN	NaN	NaN	28.5671	28.4779	24.4124	21.549	20	20	20	30.5	30.5	30.5	85.377	0	279.16	3125000000	54	AOC1	P19801	Amiloride-sensitive amine oxidase [copper-containing]	P19801
30.7597	NaN	NaN	NaN	27.7471	27.3345	23.4816	NaN	23	23	23	19.8	19.8	19.8	158.54	0	323.31	2224200000	53	ATRN	O75882	Attractin	O75882
29.474	24.3894	24.0301	23.6436	26.8955	24.2073	25.8783	23.5347	14	14	14	46.6	46.6	46.6	38.604	0	273.91	1015900000	53	ANXA2;ANXA2P2	P07355;A6NMY6	Annexin A2;Putative annexin A2-like protein	P07355;A6NMY6
30.8154	NaN	NaN	NaN	28.7953	26.5092	24.7993	22.4616	21	21	16	34.8	34.8	26.6	69.412	0	272.44	2485900000	53	EZR	P15311	Ezrin	P15311
31.8292	NaN	NaN	NaN	30.5816	25.7841	NaN	NaN	23	23	19	59.9	59.9	51.8	49.301	0	323.31	5480100000	52	VPS4B	O75351;Q6PIW4	Vacuolar protein sorting-associated protein 4B	O75351
30.8469	NaN	NaN	NaN	28.0829	26.9015	20.6387	NaN	22	22	22	25.3	25.3	25.3	122.2	0	323.31	2342600000	52	CP	P00450;CON__ENSEMBL:ENSBTAP00000031900	Ceruloplasmin	P00450
32.235	NaN	NaN	NaN	29.2055	29.1249	25.1404	22.793	16	16	13	36.2	36.2	31.4	54.305	0	227.57	6303600000	52	VTN	P04004;H0YJW9	Vitronectin;Vitronectin V65 subunit;Vitronectin V10 subunit;Somatomedin-B	P04004
30.9236	NaN	NaN	NaN	29.7141	25.7113	19.2017	NaN	25	25	25	23.3	23.3	23.3	149.71	0	323.31	2973000000	52	ACE	P12821;F6X3S4	Angiotensin-converting enzyme;Angiotensin-converting enzyme, soluble form	P12821;F6X3S4
31.4823	NaN	NaN	NaN	28.3132	27.664	23.3037	NaN	19	19	19	35.8	35.8	35.8	82.265	0	303.91	3556600000	52	NAGLU	P54802	Alpha-N-acetylglucosaminidase;Alpha-N-acetylglucosaminidase 82 kDa form;Alpha-N-acetylglucosaminidase 77 kDa form	P54802
30.9633	NaN	NaN	NaN	29.4498	26.5323	23.4908	NaN	20	20	12	33.6	33.6	20.4	70.897	0	226.59	2935700000	51	HSPA8	P11142	Heat shock cognate 71 kDa protein	P11142
30.0706	NaN	NaN	NaN	26.2562	26.7183	21.7616	NaN	24	24	24	13.7	13.7	13.7	262.62	0	297.31	1321700000	50	FN1	P02751	Fibronectin;Anastellin;Ugl-Y1;Ugl-Y2;Ugl-Y3	P02751
31.6334	NaN	NaN	NaN	29.4715	28.6307	24.2918	NaN	13	13	13	25.8	25.8	25.8	76.074	0	179.25	4511700000	50	GLB1	P16278;Q6UWU2	Beta-galactosidase	P16278
33.1927	NaN	NaN	23.2292	32.0552	28.2883	24.1674	21.267	16	16	16	40.4	40.4	40.4	39.75	0	314.89	14639000000	50	IST1	P53990	IST1 homolog	P53990
33.3472	NaN	NaN	NaN	30.9543	29.192	24.1136	NaN	13	13	13	44.1	44.1	44.1	40.228	0	323.31	13639000000	48	LMAN2	Q12907	Vesicular integral-membrane protein VIP36	Q12907
29.7079	NaN	NaN	NaN	26.2851	26.3732	NaN	NaN	30	30	30	8.2	8.2	8.2	542.68	0	314.53	1045600000	48	FAT4	Q6V0I7	Protocadherin Fat 4	Q6V0I7
32.5553	NaN	NaN	NaN	29.7974	29.0907	25.2223	22.0756	14	14	14	38.5	38.5	38.5	49.131	0	280.66	7859800000	47	MXRA8	Q9BRK3	Matrix-remodeling-associated protein 8	Q9BRK3
32.0854	NaN	NaN	22.3908	31.0983	27.6003	25.2078	NaN	12	12	12	57.7	57.7	57.7	32.444	0	323.31	7103600000	45	SDCBP	O00560	Syntenin-1	O00560
31.1473	NaN	NaN	NaN	28.8642	27.3834	19.83	NaN	19	19	19	11.9	11.9	11.9	209.85	0	218.97	3042900000	44	MGAM	O43451;Q2M2H8	Maltase-glucoamylase, intestinal;Maltase;Glucoamylase	O43451
31.5851	NaN	NaN	20.5469	29.7793	28.5241	28.6101	25.2995	8	8	8	8	8	8	122.1	0	246.69	4981500000	43	MUC1	P15941	Mucin-1;Mucin-1 subunit alpha;Mucin-1 subunit beta	P15941
31.9111	NaN	NaN	NaN	28.4304	28.862	25.7689	21.8833	14	14	14	34.1	34.1	34.1	57.279	0	305.48	4949000000	43	OLFM4	Q6UX06	Olfactomedin-4	Q6UX06
30.8276	21.2541	20.6453	21.4379	28.2628	27.2668	23.7025	20.5991	14	14	14	35.3	35.3	35.3	47.168	0	204.37	2411300000	42	ENO1	P06733	Alpha-enolase	P06733
32.381	NaN	NaN	22.2714	30.2547	27.4037	24.2728	22.0628	15	15	15	53	53	53	45.673	0	291.71	7081500000	42	DPEP1	P16444	Dipeptidase 1	P16444
30.419	NaN	NaN	NaN	30.1904	25.0929	20.684	NaN	16	16	16	36.2	36.2	36.2	54.389	0	292.36	2698300000	42	ANXA11	P50995;P27216	Annexin A11	P50995
32.8553	NaN	NaN	NaN	30.0144	28.672	25.4946	NaN	10	10	10	16.2	16.2	16.2	103.36	0	237.9	9329400000	42	ITIH4	Q14624	Inter-alpha-trypsin inhibitor heavy chain H4;70 kDa inter-alpha-trypsin inhibitor heavy chain H4;35 kDa inter-alpha-trypsin inhibitor heavy chain H4	Q14624
33.1105	NaN	NaN	NaN	30.2277	29.0957	26.5227	23.1645	12	12	6	54.5	54.5	26.7	36.105	0	323.31	11210000000	41	IGHG1	P01857	Ig gamma-1 chain C region	P01857
30.8512	NaN	NaN	NaN	29.2871	23.9897	NaN	NaN	15	15	15	26.4	26.4	26.4	97.201	0	323.31	2608800000	40	PROM1	O43490	Prominin-1	O43490
31.7394	NaN	NaN	NaN	30.804	26.8731	23.8468	NaN	12	12	12	25.1	25.1	25.1	61.409	0	222.39	5598000000	40	GGT1;GGT3P;GGT2	P19440;A6NGU5;P36268;Q14390;B5MD39;Q9BX51	Gamma-glutamyltranspeptidase 1;Gamma-glutamyltranspeptidase 1 heavy chain;Gamma-glutamyltranspeptidase 1 light chain;Putative gamma-glutamyltranspeptidase 3;Putative gamma-glutamyltranspeptidase 3 heavy chain;Putative gamma-glutamyltranspeptidase 3 light chain;Inactive gamma-glutamyltranspeptidase 2	P19440;A6NGU5;P36268
30.2122	NaN	NaN	NaN	27.5448	26.0873	21.7738	NaN	16	16	16	49.2	49.2	49.2	44.614	0	265.93	1514500000	39	PGK1	P00558;P07205	Phosphoglycerate kinase 1	P00558
30.1203	23.1869	21.6412	22.4295	27.0946	27.0926	25.8537	21.9599	9	9	9	36.1	36.1	36.1	36.053	0	144.46	1536700000	39	GAPDH	P04406	Glyceraldehyde-3-phosphate dehydrogenase	P04406
30.8082	NaN	NaN	NaN	29.5601	25.4621	NaN	NaN	18	18	18	24.7	24.7	24.7	88.278	0	247.61	2717900000	39	DPP4	P27487	Dipeptidyl peptidase 4;Dipeptidyl peptidase 4 membrane form;Dipeptidyl peptidase 4 soluble form	P27487
30.964	NaN	NaN	NaN	28.5513	26.9819	22.1923	NaN	11	11	11	32.7	32.7	32.7	48.507	0	182.37	2625300000	38	PLAU	P00749	Urokinase-type plasminogen activator;Urokinase-type plasminogen activator long chain A;Urokinase-type plasminogen activator short chain A;Urokinase-type plasminogen activator chain B	P00749
31.3376	NaN	NaN	NaN	28.6567	27.7828	23.0072	20.0878	11	11	11	38.6	38.6	38.6	54.253	0	233.97	3377200000	38	A1BG	P04217;CON__Q2KJF1	Alpha-1B-glycoprotein	P04217
30.1358	NaN	NaN	NaN	27.2708	26.161	21.7308	NaN	19	19	19	47.3	47.3	47.3	57.936	0	244.73	1420200000	38	PKM	P14618;P30613	Pyruvate kinase PKM	P14618
30.3312	NaN	NaN	19.692	28.6477	24.4146	NaN	NaN	18	18	18	21.3	21.3	21.3	113.14	0	207.22	1794500000	38	SLC12A3	P55017	Solute carrier family 12 member 3	P55017
29.6434	NaN	NaN	NaN	26.4133	25.6433	20.8112	NaN	23	23	21	22.7	22.7	21.4	131.14	0	208.52	982210000	38	MAN2A1	Q16706	Alpha-mannosidase 2	Q16706
30.3742	NaN	NaN	21.7643	29.1848	26.9793	26.3744	24.8314	7	7	7	20.4	20.4	20.4	48.193	0	114.32	2254700000	37	GPRC5C	Q9NQ84	G-protein coupled receptor family C group 5 member C	Q9NQ84
31.5148	NaN	NaN	NaN	30.7254	25.9467	NaN	NaN	14	14	14	29.1	29.1	29.1	75.624	0	323.31	4908300000	36	XPNPEP2	O43895	Xaa-Pro aminopeptidase 2	O43895
30.9486	NaN	NaN	NaN	30.0087	24.6397	21.4571	NaN	18	14	14	46.7	38.4	38.4	48.897	0	173.94	3181500000	35	VPS4A	Q9UN37;I3L4J1	Vacuolar protein sorting-associated protein 4A	Q9UN37;I3L4J1
29.1849	NaN	NaN	NaN	27.7717	25.3602	NaN	NaN	20	18	18	39.6	36.6	36.6	78.181	0	209.44	882520000	34	LTF	P02788	Lactotransferrin;Lactoferricin-H;Kaliocin-1;Lactoferroxin-A;Lactoferroxin-B;Lactoferroxin-C	P02788
29.6251	NaN	NaN	19.5462	27.8477	24.6641	20.4019	19.8506	19	15	6	37	31.7	13.7	70.051	0	193.97	1099200000	34	HSPA1B;HSPA1A	P0DMV9;P0DMV8	Heat shock 70 kDa protein 1B;Heat shock 70 kDa protein 1A	P0DMV9;P0DMV8
30.7244	NaN	NaN	NaN	27.7886	27.7047	22.6757	NaN	10	10	10	35.9	35.9	35.9	41.654	0	213.77	2231300000	34	BGN	P21810;P07585	Biglycan	P21810
29.0722	NaN	NaN	NaN	26.6716	25.9452	19.685	NaN	15	15	15	7.3	7.3	7.3	303.1	0	112.99	736780000	34	MEGF8	Q7Z7M0	Multiple epidermal growth factor-like domains protein 8	Q7Z7M0
29.4466	NaN	NaN	NaN	26.0601	26.2369	NaN	NaN	17	17	17	14.2	14.2	14.2	140.94	0	203.61	880710000	33	CFB	B4E1Z4;P00751	Complement factor B;Complement factor B Ba fragment;Complement factor B Bb fragment	B4E1Z4;P00751
33.0621	NaN	NaN	22.5256	30.4952	30.9859	27.2814	25.054	9	9	9	14.3	14.3	14.3	75.702	0	190.33	12812000000	33	MASP2	O00187	Mannan-binding lectin serine protease 2;Mannan-binding lectin serine protease 2 A chain;Mannan-binding lectin serine protease 2 B chain	O00187
30.4011	NaN	NaN	NaN	27.6808	27.0179	24.3719	21.8107	11	11	11	29.8	29.8	29.8	49.439	0	183.66	1794400000	33	IGHM	P01871;P04220	Ig mu chain C region;Ig mu heavy chain disease protein	P01871;P04220
29.2822	NaN	NaN	NaN	28.331	23.8462	NaN	NaN	18	18	18	19.6	19.6	19.6	121.45	0	323.31	1005600000	33	SLC12A1	Q13621;P55011	Solute carrier family 12 member 1	Q13621
29.4431	NaN	NaN	NaN	26.6162	23.4273	NaN	NaN	15	15	15	19.6	19.6	19.6	112.89	0	223.82	844050000	32	ATP1A1	P05023;P13637;P50993;Q13733;P20648;P54707	Sodium/potassium-transporting ATPase subunit alpha-1	P05023
30.4213	NaN	NaN	NaN	28.5702	25.1455	23.4083	21.3565	12	12	6	43.5	43.5	22.4	37.331	0	305.99	1887400000	32	GNB2;GNB4	P62879;Q9HAV0	Guanine nucleotide-binding protein G(I)/G(S)/G(T) subunit beta-2;Guanine nucleotide-binding protein subunit beta-4	P62879;Q9HAV0
31.6701	NaN	NaN	NaN	29.2244	27.6755	23.9148	21.0503	12	12	12	26.1	26.1	26.1	60.556	0	217.86	4276600000	31	CPN2	P22792	Carboxypeptidase N subunit 2	P22792
28.8923	NaN	NaN	NaN	27.911	24.4809	NaN	NaN	15	15	15	17	17	17	109.24	0	189.44	774050000	31	ENPEP	Q07075	Glutamyl aminopeptidase	Q07075
30.9845	NaN	NaN	NaN	28.2953	27.5001	23.5054	NaN	10	10	10	17.1	17.1	17.1	107.46	0	183.23	2655700000	31	ROBO4	Q8WZ75	Roundabout homolog 4	Q8WZ75
30.2017	NaN	NaN	NaN	27.4229	27.0961	NaN	NaN	10	10	9	47	47	44.2	29.644	0	221.66	1558300000	30	DDAH2	O95865	N(G),N(G)-dimethylarginine dimethylaminohydrolase 2	O95865
29.8931	NaN	NaN	20.3731	28.2922	27.5311	24.3797	21.5638	7	7	7	16	16	16	54.465	0	209.1	1546000000	30	CTSA	P10619	Lysosomal protective protein;Lysosomal protective protein 32 kDa chain;Lysosomal protective protein 20 kDa chain	P10619
29.5438	NaN	NaN	NaN	27.9122	22.8941	NaN	NaN	16	16	16	40.1	40.1	40.1	57.129	0	188.81	1043000000	30	PDZK1;PDZK1P1	Q5T2W1;A8MUH7	Na(+)/H(+) exchange regulatory cofactor NHE-RF3;Putative PDZ domain-containing protein 1P	Q5T2W1;A8MUH7
30.306	NaN	NaN	NaN	29.0799	24.2401	NaN	NaN	13	13	13	35.6	35.6	35.6	43.944	0	200.55	1914700000	30	TSG101	Q99816	Tumor susceptibility gene 101 protein	Q99816
30.3461	NaN	NaN	NaN	27.9754	26.2485	NaN	NaN	12	12	12	27.9	27.9	27.9	90.207	0	286.72	1708500000	29	SUSD2	Q9UGT4	Sushi domain-containing protein 2	Q9UGT4
30.2553	NaN	NaN	NaN	26.9383	26.517	22.741	21.9701	12	12	11	49.8	49.8	43.8	30.777	0	136.46	1517300000	28	APOA1	P02647	Apolipoprotein A-I;Proapolipoprotein A-I;Truncated apolipoprotein A-I	P02647
32.0447	22.2556	21.5085	22.476	31.0668	27.2263	26.059	20.851	6	6	6	38.3	38.3	38.3	14.728	0	98.358	6921900000	28	UBA52;RPS27A;UBB;UBC	P62987;P62979;P0CG47;P0CG48	Ubiquitin-60S ribosomal protein L40;Ubiquitin;60S ribosomal protein L40;Ubiquitin-40S ribosomal protein S27a;Ubiquitin;40S ribosomal protein S27a;Polyubiquitin-B;Ubiquitin;Polyubiquitin-C;Ubiquitin	P62987;P62979;P0CG47;P0CG48
29.7702	NaN	NaN	NaN	27.391	26.4572	22.7195	NaN	8	8	8	14.5	14.5	14.5	65.562	0	96.728	1190700000	28	GPC3	P51654;REV__Q96HE7	Glypican-3;Secreted glypican-3	P51654
30.215	19.878	NaN	NaN	27.1763	24.7813	19.9844	19.7974	12	12	10	51.4	51.4	44.3	29.174	0	144.12	1429700000	28	YWHAE	P62258	14-3-3 protein epsilon	P62258
25.4932	24.1359	23.3225	24.1437	22.1028	24.4168	25.6808	23.2653	10	10	10	18.4	18.4	18.4	81.744	0	76.285	185460000	27	JUP	P14923;P35222	Junction plakoglobin	P14923
31.2019	NaN	NaN	NaN	30.7162	26.8604	NaN	NaN	8	8	8	11.4	11.4	11.4	54.973	0	83.939	4356000000	27	SLC2A5	P22732	Solute carrier family 2, facilitated glucose transporter member 5	P22732
29.9906	NaN	NaN	NaN	27.0635	26.5627	20.6154	NaN	11	11	11	28.6	28.6	28.6	48.541	0	115.74	1307800000	27	SERPINA4	P29622	Kallistatin	P29622
29.3782	NaN	NaN	NaN	27.2118	25.5804	NaN	NaN	11	11	11	30.1	30.1	30.1	45.884	0	138.61	903410000	27	ACY1	Q03154;A0A1B0GW23	Aminoacylase-1	Q03154;A0A1B0GW23
30.3491	NaN	NaN	21.1286	29.2323	25.1446	22.4684	NaN	9	9	9	45.5	45.5	45.5	24.95	0	157.89	2043500000	27	CHMP4B	Q9H444;P59074	Charged multivesicular body protein 4b	Q9H444
31.6215	NaN	NaN	NaN	29.4186	28.8493	24.7995	20.6304	6	6	3	35	35	17.3	23.063	0	162.2	4535900000	26	IGLL5;IGLC1	B9A064;P0CG04	Immunoglobulin lambda-like polypeptide 5;Ig lambda-1 chain C regions	B9A064;P0CG04
30.428	NaN	NaN	NaN	28.3321	26.8496	20.1782	NaN	8	8	8	23.4	23.4	23.4	47.65	0	135.26	1904600000	26	SERPINA3	P01011	Alpha-1-antichymotrypsin;Alpha-1-antichymotrypsin His-Pro-less	P01011
29.9011	NaN	NaN	NaN	26.9052	26.2403	20.5648	NaN	12	12	12	25.2	25.2	25.2	65.75	0	161.97	1209100000	26	CFI	P05156;CON__Q32PI4	Complement factor I;Complement factor I heavy chain;Complement factor I light chain	P05156
28.9306	NaN	NaN	NaN	26.4145	25.7119	NaN	20.9751	13	13	6	21.9	21.9	11.3	84.659	0	138.93	658110000	26	HSP90AA1	P07900;Q58FF7;Q14568;Q58FF8;Q58FF6;Q58FG0	Heat shock protein HSP 90-alpha	P07900
29.4659	NaN	NaN	NaN	28.4118	24.6948	NaN	NaN	11	11	11	61.5	61.5	61.5	25.425	0	224.5	1125800000	26	VPS28	Q9UK41	Vacuolar protein sorting-associated protein 28 homolog	Q9UK41
30.6318	NaN	NaN	NaN	30.441	26.3302	20.8249	NaN	8	8	8	27	27	27	25.104	0	130.73	3207700000	25	CHMP2A	O43633	Charged multivesicular body protein 2a	O43633
30.2485	NaN	NaN	NaN	27.5803	27.2061	23.5366	NaN	9	9	9	31.2	31.2	31.2	38.999	0	109.3	1643300000	25	AMBP	P02760;CON__P00978	Protein AMBP;Alpha-1-microglobulin;Inter-alpha-trypsin inhibitor light chain;Trypstatin	P02760
31.3203	NaN	NaN	NaN	28.5504	27.0992	25.0871	24.2373	6	6	6	30.2	30.2	30.2	21.275	0	93.884	3273700000	25	APOD	P05090	Apolipoprotein D	P05090
28.1749	20.8703	20.3134	23.6669	24.6891	25.7036	23.9546	23.945	6	6	6	57.3	57.3	57.3	11.367	0	39.306	433660000	25	HIST1H4A	P62805	Histone H4	P62805
28.8117	27.869	26.047	26.2686	27.9407	27.2137	26.6959	21.37	5	5	5	34.5	34.5	34.5	11.284	0	47.321	1391200000	25	DCD	P81605	Dermcidin;Survival-promoting peptide;DCD-1	P81605
30.525	NaN	NaN	22.4748	28.4419	24.997	NaN	NaN	9	9	9	31.6	31.6	31.6	46.476	0	195.77	1949000000	25	BROX	Q5VW32	BRO1 domain-containing protein BROX	Q5VW32
30.3405	NaN	NaN	20.9368	29.2382	25.342	21.236	20.1313	4	4	4	25.1	25.1	25.1	24.57	0	101.05	2041000000	25	CHMP5	Q9NZZ3	Charged multivesicular body protein 5	Q9NZZ3
30.1797	NaN	NaN	NaN	25.8771	27.4946	26.5938	22.3635	8	8	8	16.7	16.7	16.7	58.635	0	190.43	1573600000	24	PODXL	O00592	Podocalyxin	O00592
30.7688	NaN	NaN	NaN	27.9833	27.5555	22.0034	NaN	9	9	6	34.6	34.6	29.2	39.324	0	154.33	2296300000	24	AHSG	P02765	Alpha-2-HS-glycoprotein;Alpha-2-HS-glycoprotein chain A;Alpha-2-HS-glycoprotein chain B	P02765
30.3368	NaN	NaN	NaN	27.5783	23.8022	NaN	NaN	14	14	14	50.8	50.8	50.8	35.882	0	275.01	1571100000	24	ANXA4	P09525	Annexin A4	P09525
30.9589	NaN	NaN	NaN	28.8865	28.1648	25.0218	NaN	5	2	2	63.2	27.4	27.4	11.265	0	19.551	2918300000	24	IGLC6	P0DOY3;P0DOY2;P0CF74;A0M8Q6	Ig lambda-6 chain C region	P0DOY3;P0DOY2;P0CF74
29.7376	NaN	NaN	NaN	27.0678	25.2985	20.7092	NaN	11	11	11	36	36	36	44.998	0	161.73	1078900000	24	BHMT	Q93088;Q9H2M3	Betaine--homocysteine S-methyltransferase 1	Q93088
32.7683	NaN	NaN	21.7311	28.8582	26.7227	24.9328	NaN	10	7	5	40.8	28.5	20.6	35.9	0	136.75	7948500000	23	IGHG2	P01859	Ig gamma-2 chain C region	P01859
29.1585	NaN	NaN	NaN	25.3041	26.1333	NaN	NaN	12	12	12	24.5	24.5	24.5	70.108	0	164.7	714270000	23	F11	P03951	Coagulation factor XI;Coagulation factor XIa heavy chain;Coagulation factor XIa light chain	P03951
28.9265	NaN	NaN	NaN	27.1266	25.3956	NaN	NaN	9	9	9	41.6	41.6	41.6	30.791	0	88.807	700860000	23	TPI1	P60174	Triosephosphate isomerase	P60174
30.2691	NaN	NaN	NaN	27.0503	26.6532	21.4789	NaN	10	10	10	23.7	23.7	23.7	54.163	0	91.884	1541300000	23	CPVL	Q9H3G5	Probable serine carboxypeptidase CPVL	Q9H3G5
29.0554	NaN	NaN	NaN	25.5348	25.6644	20.714	NaN	11	11	11	23.8	23.8	23.8	63.173	0	107.72	661410000	22	C9	P02748;CON__Q3MHN2	Complement component C9;Complement component C9a;Complement component C9b	P02748
30.6005	NaN	NaN	NaN	26.884	26.292	NaN	NaN	9	9	9	59.2	59.2	59.2	23.01	0	153.42	1834000000	22	RBP4	P02753	Retinol-binding protein 4;Plasma retinol-binding protein(1-182);Plasma retinol-binding protein(1-181);Plasma retinol-binding protein(1-179);Plasma retinol-binding protein(1-176)	P02753
30.6371	NaN	NaN	NaN	26.8666	27.1034	23.1765	20.605	11	11	11	34.7	34.7	34.7	44.566	0	171.86	1947500000	22	ACPP	P15309	Prostatic acid phosphatase;PAPf39	P15309
NaN	24.0346	23.3502	20.5466	NaN	22.1455	26.7154	22.1025	6	6	6	24.4	24.4	24.4	27.679	0	79.29	148750000	22	CASP14	P31944	Caspase-14;Caspase-14 subunit p17, mature form;Caspase-14 subunit p10, mature form;Caspase-14 subunit p20, intermediate form;Caspase-14 subunit p8, intermediate form	P31944
29.4173	NaN	NaN	NaN	26.2726	24.7965	21.2527	NaN	11	11	1	36.6	36.6	2.9	50.135	0	161.19	829670000	22	TUBA1A;TUBA1C;TUBA3C;TUBA3E;TUBA8	Q71U36;Q9BQE3;Q13748;Q6PEY2;Q9NY65	Tubulin alpha-1A chain;Tubulin alpha-1C chain;Tubulin alpha-3C/D chain;Tubulin alpha-3E chain;Tubulin alpha-8 chain	Q71U36;Q9BQE3;Q13748;Q6PEY2;Q9NY65
30.8566	NaN	NaN	NaN	28.2225	27.9967	23.3581	21.5948	6	6	6	53.5	53.5	53.5	21.534	0	174.46	2539300000	22	VMO1	Q7Z5L0	Vitelline membrane outer layer protein 1 homolog	Q7Z5L0
30.78	NaN	NaN	NaN	29.2027	27.348	24.1422	NaN	6	6	6	41.5	41.5	41.5	18.098	0	52.747	2650900000	21	IGJ	P01591	Immunoglobulin J chain	P01591
29.4869	NaN	NaN	NaN	27.0699	26.4086	NaN	NaN	8	8	8	28	28	28	46.324	0	218.13	982350000	21	SERPINA7	P05543;CON__Q9TT36	Thyroxine-binding globulin	P05543
28.332	NaN	NaN	NaN	26.7594	20.4688	NaN	NaN	15	15	14	14.5	14.5	13.8	141.48	0	154.57	452950000	21	ABCB1	P08183;P21439	Multidrug resistance protein 1	P08183
28.8112	NaN	NaN	19.7454	26.7213	NaN	NaN	NaN	9	9	9	68.7	68.7	68.7	22.693	0	120.35	582520000	21	BASP1	P80723	Brain acid soluble protein 1	P80723
29.1139	23.8351	23.1715	22.7549	26.2008	24.1223	24.9581	22.2696	8	8	7	46.7	46.7	41.2	22.11	0	51.813	745500000	21	PRDX1	Q06830;Q13162	Peroxiredoxin-1	Q06830
29.0783	NaN	NaN	NaN	27.8005	NaN	NaN	NaN	15	15	15	38.6	38.6	38.6	52.263	0	211.25	800570000	21	UEVLD	Q8IX04	Ubiquitin-conjugating enzyme E2 variant 3	Q8IX04
29.2661	NaN	NaN	NaN	25.9804	NaN	NaN	NaN	15	15	15	27.1	27.1	27.1	70.659	0	237.91	711830000	21	KIF12	Q96FN5	Kinesin-like protein KIF12	Q96FN5
30.6528	NaN	NaN	NaN	29.3679	25.5141	22.6851	20.4436	4	4	4	13.4	13.4	13.4	44.794	0	70.459	2437100000	21	GPRC5B	Q9NZH0	G-protein coupled receptor family C group 5 member B	Q9NZH0
28.5067	NaN	NaN	NaN	24.1003	25.0072	NaN	NaN	16	16	16	5.4	5.4	5.4	572.01	0	108.8	433090000	21	FCGBP	Q9Y6R7	IgGFc-binding protein	Q9Y6R7
31.28	NaN	NaN	NaN	28.2253	27.3318	19.7859	NaN	6	6	6	15.6	15.6	15.6	61.247	0	148.46	3091100000	20	TPP1	O14773	Tripeptidyl-peptidase 1	O14773
29.2216	NaN	NaN	NaN	25.9487	25.4104	NaN	NaN	9	9	9	23.8	23.8	23.8	53.162	0	106.22	735350000	20	LPL	P06858	Lipoprotein lipase	P06858
30.348	NaN	NaN	NaN	26.9528	25.6519	21.0832	NaN	12	12	12	3.8	3.8	3.8	468.83	0	132.67	1551500000	20	HSPG2	P98160	Basement membrane-specific heparan sulfate proteoglycan core protein;Endorepellin;LG3 peptide	P98160
29.4074	NaN	NaN	NaN	25.5859	25.8087	NaN	NaN	11	11	11	31.4	31.4	31.4	50.228	0	100.82	821160000	20	FGL2	Q14314	Fibroleukin	Q14314
29.0355	NaN	NaN	NaN	27.729	25.2309	22.8844	NaN	5	5	5	7.2	7.2	7.2	79.253	0	136.53	819840000	20	SLC44A4	Q53GD3	Choline transporter-like protein 4	Q53GD3
28.4804	NaN	NaN	NaN	25.2947	25.3561	NaN	NaN	14	14	14	8.6	8.6	8.6	217.23	0	134.64	458600000	19	AGRN	O00468	Agrin;Agrin N-terminal 110 kDa subunit;Agrin C-terminal 110 kDa subunit;Agrin C-terminal 90 kDa fragment;Agrin C-terminal 22 kDa fragment	O00468
28.9515	NaN	NaN	NaN	25.5683	24.9865	NaN	NaN	10	10	8	25.2	25.2	20.7	62.411	0	146.74	602110000	19	GPC4	O75487	Glypican-4;Secreted glypican-4	O75487
28.7807	NaN	NaN	NaN	25.6794	24.134	NaN	NaN	9	9	9	27.3	27.3	27.3	46.659	0	94.184	533320000	19	IDH1	O75874;P48735	Isocitrate dehydrogenase [NADP] cytoplasmic	O75874
30.6524	NaN	NaN	NaN	28.179	27.3227	23.8833	NaN	7	7	7	29	29	29	45.386	0	149.4	2174900000	19	NAPSA	O96009	Napsin-A	O96009
29.38	NaN	NaN	NaN	25.5498	25.1099	21.0799	NaN	11	11	11	30.8	30.8	30.8	45.398	0	80.968	786200000	19	APOA4	P06727	Apolipoprotein A-IV	P06727
28.5432	NaN	NaN	NaN	27.3686	24.4483	NaN	NaN	8	8	8	20.6	20.6	20.6	48.344	0	160.6	587340000	19	ACP2	P11117	Lysosomal acid phosphatase	P11117
29.413	NaN	NaN	NaN	25.3569	24.6499	20.914	NaN	9	9	9	34.1	34.1	34.1	42.644	0	162.58	786110000	19	CKB	P12277;P06732	Creatine kinase B-type	P12277
30.4446	NaN	NaN	NaN	27.4727	25.9435	22.8602	NaN	6	6	6	5.4	5.4	5.4	141.72	0	98.516	1719700000	19	COL15A1	P39059	Collagen alpha-1(XV) chain;Restin;Restin-2;Restin-3;Restin-4	P39059
30.4383	NaN	NaN	NaN	28.9127	25.7498	21.2887	21.2391	7	7	7	47.9	47.9	47.9	18.012	0	61.08	2021700000	19	PPIA	P62937;P0DN26;A0A0B4J2A2;A0A075B767;A0A075B759;Q9Y536;F5H284;P0DN37	Peptidyl-prolyl cis-trans isomerase A;Peptidyl-prolyl cis-trans isomerase A, N-terminally processed	P62937
27.2359	NaN	NaN	NaN	23.0562	24.4381	NaN	NaN	11	11	11	10.8	10.8	10.8	134.55	0	79.312	189510000	19	GLG1	Q92896	Golgi apparatus protein 1	Q92896
27.5609	NaN	NaN	NaN	24.0965	24.9768	NaN	NaN	16	16	16	6.8	6.8	6.8	312.15	0	108.54	248940000	19	MXRA5	Q9NR99	Matrix-remodeling-associated protein 5	Q9NR99
NaN	23.2374	23.3309	22.7375	NaN	22.7581	22.9551	23.3307	7	7	7	8.1	8.1	8.1	134.28	0	49.461	53208000	18	EGFR	P00533;P04626;Q15303	Epidermal growth factor receptor	P00533
29.1628	NaN	NaN	NaN	25.6975	25.3789	NaN	NaN	10	10	10	26	26	26	46.53	0	59.445	699040000	18	ASS1	P00966	Argininosuccinate synthase	P00966
29.188	NaN	NaN	NaN	25.6816	24.9402	NaN	NaN	13	13	13	26.8	26.8	26.8	66.034	0	136.53	697620000	18	IGFALS	P35858	Insulin-like growth factor-binding protein complex acid labile subunit	P35858
28.7056	20.4698	19.5417	22.3717	26.8049	23.6161	21.8955	20.4458	8	8	6	40.3	40.3	35.6	16.837	0	74.926	580840000	18	CALM1	P62158;P02585	Calmodulin	P62158
29.6437	NaN	NaN	NaN	28.0287	21.6284	21.1417	NaN	8	8	7	9	9	7.9	111.02	0	74.234	1118200000	18	GNAS	Q5JWF2;P38405	Guanine nucleotide-binding protein G(s) subunit alpha isoforms XLas	Q5JWF2
29.0417	NaN	NaN	NaN	26.2305	24.9219	20.6228	NaN	8	8	8	15.3	15.3	15.3	71.712	0	86.654	664760000	18	VASN	Q6EMK4	Vasorin	Q6EMK4
28.9748	NaN	NaN	NaN	25.996	25.1018	21.5189	NaN	7	7	7	24.8	24.8	24.8	35.964	0	56.334	633520000	18	GGH	Q92820	Gamma-glutamyl hydrolase	Q92820
29.5156	NaN	NaN	NaN	26.4417	24.55	NaN	NaN	13	13	13	37.7	37.7	37.7	52.878	0	95.009	883220000	18	CNDP2	Q96KP4	Cytosolic non-specific dipeptidase	Q96KP4
28.6151	NaN	NaN	NaN	25.9486	24.9964	20.1202	NaN	7	7	7	19.6	19.6	19.6	52.602	0	99.978	510510000	17	SERPINC1	P01008;CON__P41361	Antithrombin-III	P01008
28.7023	NaN	NaN	NaN	24.9112	20.306	NaN	NaN	10	10	10	19.2	19.2	19.2	75.872	0	178.71	469630000	17	ANXA6	P08133	Annexin A6	P08133
28.5204	NaN	NaN	NaN	26.7179	25.1597	NaN	NaN	7	7	7	23.7	23.7	23.7	36.573	0	71.322	532900000	17	AKR1A1	P14550	Alcohol dehydrogenase [NADP(+)]	P14550
27.8954	NaN	NaN	NaN	26.3386	24.1222	21.316	NaN	11	7	7	19.2	12.3	12.3	67.819	0	55.229	355390000	17	MSN	P26038	Moesin	P26038
28.7866	NaN	NaN	NaN	27.7104	24.3536	NaN	NaN	8	8	8	36.5	36.5	36.5	31.73	0	169.49	704100000	17	STOM	P27105	Erythrocyte band 7 integral membrane protein	P27105
NaN	23.274	18.0534	NaN	NaN	22.2658	25.9942	NaN	10	10	10	17.9	17.9	17.9	76.631	0	82.872	82297000	17	TGM3	Q08188	Protein-glutamine gamma-glutamyltransferase E;Protein-glutamine gamma-glutamyltransferase E 50 kDa catalytic chain;Protein-glutamine gamma-glutamyltransferase E 27 kDa non-catalytic chain	Q08188
27.6325	NaN	NaN	NaN	25.6406	25.2166	NaN	NaN	9	9	9	15.1	15.1	15.1	84.542	0	82.353	299370000	17	MGAT5	Q09328	Alpha-1,6-mannosylglycoprotein 6-beta-N-acetylglucosaminyltransferase A	Q09328
30.5395	NaN	NaN	NaN	28.8421	24.7401	NaN	NaN	8	8	8	33.2	33.2	33.2	33.879	0	190.39	2069800000	17	VTA1	Q9NP79	Vacuolar protein sorting-associated protein VTA1 homolog	Q9NP79
29.5963	NaN	NaN	NaN	26.6385	25.6708	NaN	NaN	8	8	8	19.1	19.1	19.1	53.498	0	81.79	969550000	17	C1RL	Q9NZP8;P00736	Complement C1r subcomponent-like protein	Q9NZP8
29.0613	NaN	NaN	NaN	26.5861	24.1204	21.8245	NaN	8	8	8	26.5	26.5	26.5	38.868	0	59.335	682880000	16	SLC9A3R1	O14745	Na(+)/H(+) exchange regulatory cofactor NHE-RF1	O14745
29.2054	NaN	NaN	NaN	25.8928	25.4128	NaN	NaN	8	8	8	23	23	23	45.14	0	105.8	725980000	16	SERPINA6	P08185	Corticosteroid-binding globulin	P08185
28.9768	NaN	NaN	NaN	27.3603	25.8251	NaN	NaN	5	5	5	25.8	25.8	25.8	25.851	0	44.526	760050000	16	SOD3	P08294	Extracellular superoxide dismutase [Cu-Zn]	P08294
28.7344	NaN	NaN	NaN	25.0556	24.6696	20.9383	NaN	10	10	10	19.1	19.1	19.1	67.404	0	75.056	510180000	16	BCAM	P50895	Basal cell adhesion molecule	P50895
26.8887	22.8264	NaN	NaN	NaN	NaN	27.5359	24.1877	11	11	11	15.1	15.1	15.1	99.986	0	98.603	345400000	16	DSC1	Q08554	Desmocollin-1	Q08554
26.2415	22.5391	NaN	NaN	NaN	NaN	27.085	NaN	11	11	11	28.7	28.7	28.7	64.135	0	99.13	227790000	16	KPRP	Q5T749	Keratinocyte proline-rich protein	Q5T749
29.2531	NaN	NaN	NaN	25.4978	25.5715	21.6997	NaN	6	6	6	16	16	16	57.104	0	103.1	740490000	16	ANGPTL2	Q9UKU9;Q8NI99	Angiopoietin-related protein 2	Q9UKU9
28.9072	NaN	NaN	NaN	26.3216	24.9757	NaN	NaN	8	8	8	23.8	23.8	23.8	51.676	0	77.579	620270000	15	HPX	P02790	Hemopexin	P02790
24.0305	22.1401	22.1367	21.839	22.0645	22.4268	24.5847	19.5511	4	4	4	10.2	10.2	10.2	59.755	0	42.766	66074000	15	CAT	P04040	Catalase	P04040
28.8065	NaN	NaN	NaN	26.1213	25.3425	NaN	NaN	6	6	6	22	22	22	39.473	0	85.837	585010000	15	ALDOB	P05062	Fructose-bisphosphate aldolase B	P05062
28.1848	21.7322	21.5843	21.4928	21.758	22.0614	NaN	20.6336	8	8	1	26.6	26.6	3.4	49.67	0	103.16	324250000	15	TUBB;TUBB2B;TUBB2A	P07437;Q9BVA1;Q13885;CON__ENSEMBL:ENSBTAP00000025008;Q3ZCM7;A6NNZ2;Q9BUF5;Q9H4B7	Tubulin beta chain;Tubulin beta-2B chain;Tubulin beta-2A chain	P07437;Q9BVA1;Q13885
27.6456	NaN	NaN	NaN	25.893	23.7628	NaN	NaN	7	7	7	15.9	15.9	15.9	67.993	0	90.388	286510000	15	SLC3A2	P08195	4F2 cell-surface antigen heavy chain	P08195
30.0826	NaN	NaN	NaN	27.3157	25.6839	NaN	NaN	7	7	7	31.5	31.5	31.5	25.631	0	95.521	1357900000	15	GSTA1;GSTA2	P08263;P09210;Q7RTV2;Q16772	Glutathione S-transferase A1;Glutathione S-transferase A1, N-terminally processed;Glutathione S-transferase A2	P08263;P09210
29.0142	NaN	NaN	NaN	25.5388	24.2828	NaN	NaN	7	7	7	35	35	35	30.375	0	135.64	611350000	15	CBR1	P16152;O75828	Carbonyl reductase [NADPH] 1	P16152
29.8773	NaN	NaN	NaN	26.3624	24.8992	NaN	NaN	9	9	9	8.1	8.1	8.1	178.19	0	204.71	1103800000	15	COL18A1	P39060	Collagen alpha-1(XVIII) chain;Endostatin	P39060
29.678	NaN	NaN	NaN	26.9175	24.9546	NaN	21.1324	8	8	8	25.6	25.6	25.6	44.659	0	124.08	1020500000	15	ASAH1	Q13510	Acid ceramidase;Acid ceramidase subunit alpha;Acid ceramidase subunit beta	Q13510
29.113	NaN	NaN	NaN	26.7613	25.0604	20.2452	NaN	5	5	5	26.2	26.2	26.2	36.431	0	100.44	730590000	15	PRSS8	Q16651	Prostasin;Prostasin light chain;Prostasin heavy chain	Q16651
28.6526	NaN	NaN	NaN	25.4803	24.9989	18.9881	NaN	7	7	7	20	20	20	45.467	0	56.604	502850000	15	NEU1	Q99519	Sialidase-1	Q99519
28.4176	NaN	NaN	NaN	26.9822	NaN	NaN	NaN	11	11	10	24.3	24.3	22.7	60.626	0	87.677	491110000	15	EHD1	Q9H4M9;Q9NZN3	EH domain-containing protein 1	Q9H4M9
28.8089	NaN	NaN	NaN	27.4459	24.9996	NaN	NaN	6	6	6	16.1	16.1	16.1	53.859	0	109.23	686630000	14	TMPRSS2	O15393	Transmembrane protease serine 2;Transmembrane protease serine 2 non-catalytic chain;Transmembrane protease serine 2 catalytic chain	O15393
28.0874	NaN	NaN	NaN	23.0091	24.9274	NaN	NaN	15	9	9	11.5	8.1	8.1	163.29	0	80.15	325550000	14	A2M	P01023	Alpha-2-macroglobulin	P01023
NaN	23.71	22.3698	22.6147	NaN	23.2308	24.8865	20.3026	5	5	5	59.2	59.2	59.2	11.006	0	39.041	67718000	14	CSTA	P01040	Cystatin-A;Cystatin-A, N-terminally processed	P01040
28.208	20.5344	20.3193	20.0323	25.7179	NaN	NaN	20.1332	5	5	5	47.1	47.1	47.1	15.054	0	52.245	370310000	14	PFN1	P07737;CON__P02584	Profilin-1	P07737
29.0668	NaN	NaN	NaN	27.6839	25.369	21.4287	NaN	4	4	4	25	25	25	14.177	0	40.24	824100000	14	CD59	P13987	CD59 glycoprotein	P13987
27.8085	NaN	NaN	NaN	27.3061	NaN	NaN	NaN	10	10	10	24.2	24.2	24.2	52.739	0	154.76	401020000	14	ANXA7	P20073	Annexin A7	P20073
30.5556	NaN	NaN	NaN	29.2042	27.3534	24.9619	22.708	5	5	5	23.2	23.2	23.2	25.416	0	84.402	2407700000	14	CD9	P21926	CD9 antigen	P21926
28.1822	NaN	NaN	NaN	25.5026	25.1375	NaN	NaN	7	7	7	15.1	15.1	15.1	61.68	0	50.935	389030000	14	GPC1	P35052	Glypican-1;Secreted glypican-1	P35052
28.8488	NaN	NaN	NaN	27.2	23.7094	20.735	19.2189	6	6	4	38.9	38.9	28.7	23.482	0	75.079	653710000	14	RAB5C	P51148;K7ERQ8	Ras-related protein Rab-5C	P51148
29.1367	NaN	NaN	NaN	27.0915	24.5877	NaN	NaN	5	5	5	28.6	28.6	28.6	21.45	0	43.74	758440000	14	RAC1;RAC3	P63000;P60763;P15153	Ras-related C3 botulinum toxin substrate 1;Ras-related C3 botulinum toxin substrate 3	P63000;P60763
28.594	NaN	NaN	20.0173	25.673	22.0081	21.2506	19.6728	8	6	5	35.5	28.2	24.5	27.745	0	101.46	467300000	14	YWHAZ	P63104	14-3-3 protein zeta/delta	P63104
29.1965	NaN	NaN	NaN	25.8093	24.6966	19.8933	NaN	4	4	2	36.6	36.6	19	15.257	0	50.044	702150000	14	HBA1	P69905	Hemoglobin subunit alpha	P69905
28.0815	NaN	NaN	NaN	26.0339	21.6656	NaN	NaN	8	8	8	39.4	39.4	39.4	24.488	0	52.424	356060000	14	RAB11B;RAB11A	Q15907;P62491	Ras-related protein Rab-11B;Ras-related protein Rab-11A	Q15907;P62491
28.6987	NaN	NaN	NaN	27.1436	23.4758	NaN	NaN	7	7	7	35.3	35.3	35.3	29.314	0	78.982	595610000	14	MITD1	Q8WV92	MIT domain-containing protein 1	Q8WV92
27.7964	NaN	NaN	NaN	26.2871	25.5413	NaN	NaN	8	8	8	18.6	18.6	18.6	55.454	0	68.075	363830000	14	PVRL4	Q96NY8	Nectin-4;Processed poliovirus receptor-related protein 4	Q96NY8
28.1824	NaN	NaN	NaN	23.384	24.1268	NaN	NaN	9	9	9	12.4	12.4	12.4	116.18	0	106.97	333890000	14	KL	Q9UEF7	Klotho;Klotho peptide	Q9UEF7
27.6602	NaN	NaN	NaN	26.4903	23.9887	NaN	NaN	9	9	9	15.7	15.7	15.7	80.214	0	94.12	323030000	13	MFI2	P08582	Melanotransferrin	P08582
27.641	22.8147	22.6449	21.1365	25.4759	22.4206	24.2407	21.7411	4	4	4	38.1	38.1	38.1	11.737	0	26.531	301150000	13	TXN	P10599	Thioredoxin	P10599
27.6711	NaN	NaN	NaN	25.1303	23.5574	NaN	NaN	6	6	6	35	35	35	28.804	0	69.135	262790000	13	PGAM1;PGAM2;PGAM4	P18669;P15259;Q8N0Y7	Phosphoglycerate mutase 1;Phosphoglycerate mutase 2;Probable phosphoglycerate mutase 4	P18669;P15259;Q8N0Y7
28.5622	NaN	NaN	NaN	24.8296	23.8576	20.9451	NaN	7	7	7	34.7	34.7	34.7	26.559	0	76.346	443380000	13	GSTM3	P21266;P46439;P28161	Glutathione S-transferase Mu 3	P21266
25.1303	23.8074	23.8185	23.7906	26.2185	24.5428	25.0648	23.2764	4	4	4	16.4	16.4	16.4	34.258	0	28.643	228490000	13	AZGP1	P25311	Zinc-alpha-2-glycoprotein	P25311
28.7039	NaN	NaN	NaN	25.0271	24.7165	NaN	NaN	7	7	7	16.1	16.1	16.1	55.799	0	114.32	499020000	13	PRCP	P42785	Lysosomal Pro-X carboxypeptidase	P42785
28.7369	NaN	NaN	NaN	26.0466	24.6594	NaN	NaN	7	7	7	18.1	18.1	18.1	51.853	0	62.379	543180000	13	CTSC	P53634	Dipeptidyl peptidase 1;Dipeptidyl peptidase 1 exclusion domain chain;Dipeptidyl peptidase 1 heavy chain;Dipeptidyl peptidase 1 light chain	P53634
27.0609	NaN	NaN	NaN	24.6208	24.5144	NaN	NaN	8	8	8	20.1	20.1	20.1	54.64	0	88.664	189760000	13	EFEMP1	Q12805	EGF-containing fibulin-like extracellular matrix protein 1	Q12805
28.0805	NaN	NaN	NaN	27.4712	22.2731	NaN	NaN	8	8	8	19	19	19	54.29	0	59.879	474960000	13	SCARB2	Q14108	Lysosome membrane protein 2	Q14108
28.2719	NaN	NaN	NaN	24.9326	24.0721	NaN	NaN	5	5	5	26.2	26.2	26.2	29.13	0	65.527	373780000	13	IGFBP7	Q16270	Insulin-like growth factor-binding protein 7	Q16270
30.9151	NaN	NaN	22.0915	30.3354	25.4959	23.0195	22.2833	5	5	5	19.1	19.1	19.1	22.109	0	36.539	3444900000	13	CHMP1B	Q7LBR1	Charged multivesicular body protein 1b	Q7LBR1
29.1167	NaN	NaN	NaN	28.8616	27.458	23.1326	NaN	3	3	3	21	21	21	27.039	0	230.19	1263400000	13	SECTM1	Q8WVN6	Secreted and transmembrane protein 1	Q8WVN6
30.1282	NaN	NaN	NaN	27.7312	26.7869	23.7497	21.5434	4	4	4	6.2	6.2	6.2	104.41	0	51.383	1529200000	13	MMRN2	Q9H8L6	Multimerin-2	Q9H8L6
29.2153	NaN	NaN	NaN	24.5091	25.1875	22.3488	NaN	7	7	7	35.7	35.7	35.7	30.338	0	88.809	690690000	13	ITM2B	Q9Y287	Integral membrane protein 2B;BRI2, membrane form;BRI2 intracellular domain;BRI2C, soluble form;Bri23 peptide	Q9Y287
26.0657	22.315	21.9606	21.7081	25.5209	25.5795	23.3742	21.7094	3	3	3	24.6	24.6	24.6	13.952	0	21.378	195550000	12	HIST1H2BL;HIST1H2BM;HIST1H2BN;HIST1H2BH;HIST2H2BF;HIST2H2BE;HIST1H2BC;HIST1H2BD;H2BFS;HIST1H2BB;HIST1H2BO;HIST1H2BJ;HIST1H2BK;HIST3H2BB;HIST1H2BA	Q99880;Q99879;Q99877;Q93079;Q5QNW6;Q16778;P62807;P58876;P57053;P33778;P23527;P06899;O60814;Q8N257;Q96A08	Histone H2B type 1-L;Histone H2B type 1-M;Histone H2B type 1-N;Histone H2B type 1-H;Histone H2B type 2-F;Histone H2B type 2-E;Histone H2B type 1-C/E/F/G/I;Histone H2B type 1-D;Histone H2B type F-S;Histone H2B type 1-B;Histone H2B type 1-O;Histone H2B type 1-J;Histone H2B type 1-K;Histone H2B type 3-B;Histone H2B type 1-A	Q99880;Q99879;Q99877;Q93079;Q5QNW6;Q16778;P62807;P58876;P57053;P33778;P23527;P06899;O60814;Q8N257;Q96A08
28.0566	NaN	NaN	NaN	27.1358	22.4881	NaN	NaN	4	4	4	28.5	28.5	28.5	14.964	0	91.581	432530000	12	SMIM24	O75264	Small integral membrane protein 24	O75264
29.4816	NaN	NaN	NaN	27.3506	26.3458	21.3262	NaN	3	3	3	27.6	27.6	27.6	21.731	0	119.78	1008700000	12	PGLYRP1	O75594	Peptidoglycan recognition protein 1	O75594
27.2812	NaN	NaN	NaN	25.2526	24.998	NaN	NaN	7	7	7	16.9	16.9	16.9	49.405	0	51.196	236580000	12	EFEMP2	O95967	EGF-containing fibulin-like extracellular matrix protein 2	O95967
30.6784	NaN	NaN	NaN	27.8806	26.5831	NaN	NaN	4	4	4	7.9	7.9	7.9	94.972	0	239.51	2066000000	12	FGA	P02671	Fibrinogen alpha chain;Fibrinopeptide A;Fibrinogen alpha chain	P02671
29.3636	NaN	NaN	NaN	26.6584	25.1228	NaN	NaN	6	6	5	21.9	21.9	18.3	36.638	0	53.637	833210000	12	LDHB	P07195	L-lactate dehydrogenase B chain	P07195
28.3995	NaN	NaN	NaN	26.6901	23.2529	NaN	NaN	7	7	7	24.4	24.4	24.4	35.936	0	79.348	472340000	12	ANXA5	P08758	Annexin A5	P08758
27.8855	NaN	NaN	NaN	25.6616	21.3901	22.9999	NaN	6	6	6	16.9	16.9	16.9	50.513	0	47.662	312170000	12	CPM	P14384	Carboxypeptidase M	P14384
28.5555	NaN	NaN	NaN	25.1901	24.6005	NaN	NaN	8	8	8	2.6	2.6	2.6	458.22	0	135.84	458220000	12	TNXB	P22105;Q16473	Tenascin-X	P22105
29.5	NaN	NaN	NaN	27.8531	21.3615	NaN	NaN	6	6	6	34.2	34.2	34.2	21.057	0	79.201	1004400000	12	PEBP1	P30086	Phosphatidylethanolamine-binding protein 1;Hippocampal cholinergic neurostimulating peptide	P30086
27.7671	NaN	NaN	NaN	25.3475	22.1813	NaN	NaN	7	4	4	33.7	22.8	22.8	28.082	0	109.97	275870000	12	YWHAB	P31946	14-3-3 protein beta/alpha;14-3-3 protein beta/alpha, N-terminally processed	P31946
27.4693	NaN	NaN	NaN	26.1496	21.2521	NaN	NaN	8	8	8	49.3	49.3	49.3	23.489	0	116.75	262760000	12	RAB7A	P51149	Ras-related protein Rab-7a	P51149
28.7592	NaN	NaN	NaN	26.8229	20.2926	NaN	NaN	6	6	5	37.3	37.3	28.5	21.768	0	127.97	574350000	12	RHOA;RHOC	P61586;P08134;U3KQV3	Transforming protein RhoA;Rho-related GTP-binding protein RhoC	P61586;P08134
28.1624	NaN	NaN	NaN	23.3725	23.6903	NaN	NaN	8	8	8	10	10	10	106.87	0	69.877	324810000	12	GANAB	Q14697	Neutral alpha-glucosidase AB	Q14697
27.541	NaN	NaN	NaN	25.9899	23.4362	20.8456	NaN	4	4	4	40.7	40.7	40.7	13.92	0	33.775	275150000	12	C11orf52	Q96A22	Uncharacterized protein C11orf52	Q96A22
27.7795	NaN	NaN	NaN	24.4869	24.4266	20.2467	NaN	5	5	5	17.4	17.4	17.4	41.806	0	83.805	277700000	12	SDF4	Q9BRK5	45 kDa calcium-binding protein	Q9BRK5
28.3002	NaN	NaN	NaN	25.9145	24.7509	NaN	NaN	5	5	5	62.6	62.6	62.6	12.403	0	51.227	422020000	12	MIEN1	Q9BRT3	Migration and invasion enhancer 1	Q9BRT3
28.982	NaN	NaN	NaN	27.8646	23.0368	NaN	NaN	5	5	5	21.4	21.4	21.4	21.703	0	35.875	783220000	12	CHMP1A	Q9HD42	Charged multivesicular body protein 1a	Q9HD42
NaN	22.5819	20.8247	21.8585	NaN	NaN	22.5176	21.9046	4	4	4	32.9	32.9	32.9	15.892	0	52.091	21868000	12	CALML5	Q9NZT1	Calmodulin-like protein 5	Q9NZT1
29.2168	NaN	NaN	NaN	25.861	25.0755	NaN	NaN	7	7	7	29.7	29.7	29.7	39.008	0	119.5	720210000	11	ATP6AP2	O75787	Renin receptor	O75787
27.9152	NaN	NaN	NaN	25.3994	24.2076	NaN	NaN	8	8	8	46.5	46.5	46.5	27.547	0	64.194	316740000	11	PGLS	O95336	6-phosphogluconolactonase	O95336
27.8679	NaN	NaN	NaN	25.2304	23.8398	NaN	NaN	5	5	5	10.6	10.6	10.6	54.565	0	130.76	299330000	11	SERPINF2	P08697;CON__P28800	Alpha-2-antiplasmin	P08697
29.0661	NaN	NaN	20.9554	29.2973	25.8133	22.2431	21.0855	2	2	2	7.6	7.6	7.6	25.636	0	34.557	1290000000	11	CD63	P08962	CD63 antigen	P08962
27.4758	NaN	NaN	NaN	NaN	24.7159	NaN	NaN	8	8	8	13.3	13.3	13.3	92.468	0	69.911	214220000	11	HSP90B1	P14625	Endoplasmin	P14625
28.7754	NaN	NaN	NaN	25.7357	24.2489	21.5264	20.2976	6	6	6	45.2	45.2	45.2	18.502	0	114.66	539580000	11	CFL1	P23528;Q9Y281	Cofilin-1	P23528
27.8563	NaN	NaN	NaN	25.309	24.712	NaN	NaN	6	6	6	33.3	33.3	33.3	33.178	0	71.51	312040000	11	MPST	P25325	3-mercaptopyruvate sulfurtransferase	P25325
28.1378	NaN	NaN	NaN	24.8811	23.4164	NaN	NaN	7	7	7	41.1	41.1	41.1	25.035	0	61.045	337440000	11	PRDX6	P30041	Peroxiredoxin-6	P30041
28.1099	NaN	NaN	NaN	24.7564	22.2181	NaN	NaN	9	9	9	22.5	22.5	22.5	50.663	0	82.713	322910000	11	GDI2	P50395;P31150	Rab GDP dissociation inhibitor beta	P50395
27.9288	NaN	NaN	NaN	26.8045	23.6763	20.9981	NaN	6	6	4	43.6	43.6	26	20.697	0	57.98	388220000	11	ARF1;ARF3;ARF5	P84077;P61204;F5H423;P84085;H0YGG7	ADP-ribosylation factor 1;ADP-ribosylation factor 3;ADP-ribosylation factor 5	P84077;P61204;F5H423;P84085
28.6447	21.0686	NaN	NaN	24.7169	24.0403	NaN	NaN	6	5	5	53.1	46.3	46.3	15.998	0	83.348	466700000	11	HBB;HBD	P68871;P02042;P69892;P69891;P02100	Hemoglobin subunit beta;LVV-hemorphin-7;Spinorphin;Hemoglobin subunit delta	P68871;P02042
23.9999	NaN	NaN	NaN	NaN	20.8362	26.2025	NaN	9	9	9	24.8	24.8	24.8	52.562	0	62.501	95868000	11	BLMH	Q13867	Bleomycin hydrolase	Q13867
26.9786	NaN	NaN	NaN	24.7877	22.8914	NaN	NaN	7	7	7	14.9	14.9	14.9	75.207	0	74.014	168980000	11	SPARCL1	Q14515	SPARC-like protein 1	Q14515
28.7987	NaN	NaN	NaN	27.7853	23.935	NaN	NaN	5	5	5	11.4	11.4	11.4	53.216	0	54.823	714280000	11	SLC36A2	Q495M3	Proton-coupled amino acid transporter 2	Q495M3
27.3875	NaN	NaN	NaN	24.4523	23.738	NaN	NaN	6	6	6	4.5	4.5	4.5	198.54	0	41.431	212520000	11	PAPPA2	Q9BXP8	Pappalysin-2	Q9BXP8
27.8834	NaN	NaN	NaN	27.1927	NaN	NaN	NaN	8	8	2	16.5	16.5	5.7	65.733	0	68.647	401010000	11	CPNE5;CPNE9	Q9HCH3;Q8IYJ1	Copine-5;Copine-9	Q9HCH3;Q8IYJ1
26.9846	NaN	NaN	NaN	23.2936	23.7596	NaN	NaN	6	6	6	12.4	12.4	12.4	70.91	0	50.617	157270000	11	MAN1C1	Q9NR34	Mannosyl-oligosaccharide 1,2-alpha-mannosidase IC	Q9NR34
27.0634	NaN	NaN	NaN	24.0352	23.0055	NaN	NaN	7	7	7	7.6	7.6	7.6	117	0	73.099	165860000	11	TRHDE	Q9UKU6	Thyrotropin-releasing hormone-degrading ectoenzyme	Q9UKU6
27.7461	NaN	NaN	NaN	24.6481	22.7472	NaN	NaN	6	6	6	33.6	33.6	33.6	26.922	0	54.335	258450000	10	CLIC1	O00299	Chloride intracellular channel protein 1	O00299
28.5148	NaN	NaN	NaN	26.8801	22.36	NaN	NaN	4	4	4	20.5	20.5	20.5	28.879	0	75.161	512430000	10	UPK1A	O00322	Uroplakin-1a	O00322
25.9494	NaN	NaN	NaN	26.3951	NaN	NaN	NaN	8	8	8	23.2	23.2	23.2	47.355	0	68.217	153050000	10	FLOT1	O75955	Flotillin-1	O75955
27.4821	NaN	NaN	NaN	22.8263	23.8419	NaN	NaN	6	6	5	13.5	13.5	12.1	70.036	0	61.313	209940000	10	F2	P00734	Prothrombin;Activation peptide fragment 1;Activation peptide fragment 2;Thrombin light chain;Thrombin heavy chain	P00734
28.4981	NaN	NaN	NaN	25.9768	22.9999	NaN	NaN	6	6	6	25.8	25.8	25.8	29.246	0	47.324	453560000	10	CA2	P00918	Carbonic anhydrase 2	P00918
29.8923	NaN	NaN	NaN	27.8195	24.2249	NaN	NaN	2	2	2	18	18	18	17.935	0	41.016	1252900000	10	THY1	P04216	Thy-1 membrane glycoprotein	P04216
27.8218	NaN	NaN	NaN	25.6168	22.7679	NaN	NaN	4	4	4	25.9	25.9	25.9	22.782	0	48.221	295840000	10	HSPB1	P04792	Heat shock protein beta-1	P04792
27.1156	NaN	NaN	NaN	24.0737	23.4842	NaN	NaN	4	4	4	6.9	6.9	6.9	86.942	0	38.532	174800000	10	APP	P05067	Amyloid beta A4 protein;N-APP;Soluble APP-alpha;Soluble APP-beta;C99;Beta-amyloid protein 42;Beta-amyloid protein 40;C83;P3(42);P3(40);C80;Gamma-secretase C-terminal fragment 59;Gamma-secretase C-terminal fragment 57;Gamma-secretase C-terminal fragment 50;C31	P05067
29.0144	NaN	NaN	NaN	25.0161	23.4052	NaN	NaN	7	7	7	42.9	42.9	42.9	23.356	0	75.324	587300000	10	GSTP1	P09211	Glutathione S-transferase P	P09211
27.0992	NaN	NaN	NaN	25.1188	NaN	NaN	NaN	6	6	6	16.4	16.4	16.4	47.578	0	88.399	180210000	10	CNP	P09543	2,3-cyclic-nucleotide 3-phosphodiesterase	P09543
30.2799	NaN	NaN	NaN	27.4795	26.4573	NaN	NaN	4	4	4	18.7	18.7	18.7	20.838	0	24.669	1582900000	10	GM2A	P17900	Ganglioside GM2 activator;Ganglioside GM2 activator isoform short	P17900
27.2852	NaN	NaN	NaN	23.9697	22.6313	NaN	NaN	4	4	4	8.7	8.7	8.7	61.132	0	50.308	186480000	10	BTD	P43251	Biotinidase	P43251
27.8196	NaN	NaN	NaN	25.286	23.9017	20.8815	NaN	4	4	4	21.6	21.6	21.6	26.599	0	37.58	295400000	10	EIF6	P56537	Eukaryotic translation initiation factor 6	P56537
NaN	21.2758	20.5219	20.4612	27.3343	NaN	21.2456	NaN	5	5	5	42.6	42.6	42.6	16.537	0	68.764	177190000	10	LYZ	P61626	Lysozyme C	P61626
28.034	NaN	NaN	NaN	26.5305	21.5429	NaN	NaN	8	8	3	45.7	45.7	15.2	20.987	0	96.718	374830000	10	RAP1A	P62834	Ras-related protein Rap-1A	P62834
29.0672	20.2885	NaN	NaN	25.7557	23.7382	NaN	19.8062	6	6	6	20.6	20.6	20.6	50.184	0	46.606	635310000	10	EEF1A1P5;EEF1A1	Q5VTE0;P68104;Q05639	Putative elongation factor 1-alpha-like 3;Elongation factor 1-alpha 1	Q5VTE0;P68104
26.821	NaN	NaN	NaN	22.1623	23.5111	NaN	NaN	7	7	7	7.2	7.2	7.2	120.61	0	51.922	135210000	10	SEMA5A	Q13591	Semaphorin-5A	Q13591
28.6326	NaN	NaN	NaN	27.3135	22.632	NaN	NaN	8	8	8	32.3	32.3	32.3	27.729	0	52.802	589460000	10	VPS37D	Q86XT2	Vacuolar protein sorting-associated protein 37D	Q86XT2
27.1342	NaN	NaN	NaN	24.7859	22.1033	NaN	NaN	5	5	5	22	22	22	28.048	0	45.952	180730000	10	CMBL	Q96DG6	Carboxymethylenebutenolidase homolog	Q96DG6
28.2669	NaN	NaN	NaN	26.7733	NaN	NaN	NaN	5	5	5	27.8	27.8	27.8	28.783	0	72.199	437680000	10	MVB12A	Q96EY5	Multivesicular body subunit 12A	Q96EY5
26.9507	NaN	NaN	NaN	26.1845	NaN	NaN	NaN	5	5	5	13.2	13.2	13.2	61.921	0	65.777	205970000	10	SLC47A1	Q96FL8	Multidrug and toxin extrusion protein 1	Q96FL8
25.5929	NaN	NaN	NaN	21.176	NaN	23.8404	22.4064	6	6	6	10.9	10.9	10.9	80.62	0	44.769	73556000	10	EPS8L2	Q9H6S3	Epidermal growth factor receptor kinase substrate 8-like protein 2	Q9H6S3
27.7412	NaN	NaN	NaN	25.9023	21.4212	NaN	NaN	5	5	5	18.2	18.2	18.2	39.869	0	41.549	289880000	10	CAB39	Q9Y376	Calcium-binding protein 39	Q9Y376
28.2765	NaN	NaN	19.688	26.0138	25.9033	22.0212	19.9936	3	3	1	24.8	24.8	6	12.839	0	29.468	461790000	9	IGHV3-74;IGHV3OR16-13	A0A0B4J1X5;A0A075B7E8		A0A0B4J1X5;A0A075B7E8
30.1845	NaN	NaN	NaN	29.3785	26.1072	21.4438	NaN	2	2	2	7.8	7.8	7.8	48.685	0	323.31	1993300000	9	AQP1	K7N7A8;P29972	Aquaporin-1	K7N7A8;P29972
26.904	NaN	NaN	NaN	24.5127	22.7787	NaN	NaN	6	6	6	9.9	9.9	9.9	82.577	0	51.067	156710000	9	QSOX1	O00391	Sulfhydryl oxidase 1	O00391
27.6713	NaN	NaN	NaN	22.2255	NaN	NaN	NaN	10	10	10	12.7	12.7	12.7	104.85	0	67.458	218650000	9	ACTN4;ACTN1	O43707;P12814;P35609;Q08043	Alpha-actinin-4;Alpha-actinin-1	O43707;P12814
27.2992	NaN	NaN	NaN	25.6148	NaN	NaN	NaN	6	5	3	24.6	21.5	14.4	40.532	0	146.2	216530000	9	GNAI3	P08754	Guanine nucleotide-binding protein G(k) subunit alpha	P08754
27.9918	NaN	NaN	NaN	24.8955	22.1523	NaN	NaN	6	6	6	26.3	26.3	26.3	36.842	0	48.503	302780000	9	FBP1	P09467	Fructose-1,6-bisphosphatase 1	P09467
27.661	NaN	NaN	NaN	26.2006	NaN	NaN	NaN	5	5	3	22.8	22.8	14.1	23.567	0	41.599	289340000	9	RALA	P11233	Ras-related protein Ral-A	P11233
27.5904	NaN	NaN	NaN	27.4912	22.5106	NaN	NaN	5	5	5	44.5	44.5	44.5	16.572	0	45.986	396710000	9	PIP	P12273	Prolactin-inducible protein	P12273
27.7524	NaN	NaN	NaN	23.6621	21.1403	NaN	NaN	5	5	5	10	10	10	79.321	0	34.979	241690000	9	CEL	P19835	Bile salt-activated lipase	P19835
27.1736	NaN	NaN	NaN	22.9406	22.319	NaN	NaN	8	8	8	20.8	20.8	20.8	53.926	0	89.677	164660000	9	DDC	P20711	Aromatic-L-amino-acid decarboxylase	P20711
25.9478	NaN	NaN	NaN	24.4763	NaN	NaN	NaN	5	5	5	24.1	24.1	24.1	31.554	0	81.238	88063000	9	MARCKS	P29966	Myristoylated alanine-rich C-kinase substrate	P29966
27.7728	NaN	NaN	NaN	26.3469	22.1451	NaN	NaN	4	4	4	10	10	10	72.896	0	91.159	319310000	9	SLC5A2	P31639	Sodium/glucose cotransporter 2	P31639
27.096	NaN	NaN	NaN	25.7188	NaN	NaN	NaN	6	6	6	12.5	12.5	12.5	68.303	0	46.333	198670000	9	ATP6V1A	P38606	V-type proton ATPase catalytic subunit A	P38606
27.9669	NaN	NaN	NaN	22.1657	NaN	NaN	NaN	8	8	8	14.5	14.5	14.5	77.144	0	55.279	267060000	9	TGM4	P49221	Protein-glutamine gamma-glutamyltransferase 4	P49221
28.0965	NaN	NaN	NaN	25.5746	25.2043	19.3377	NaN	3	3	3	29.9	29.9	29.9	14.478	0	65.272	376290000	9	NUTF2	P61970	Nuclear transport factor 2	P61970
27.811	NaN	NaN	NaN	24.2644	24.1882	NaN	NaN	5	5	5	9.4	9.4	9.4	97.44	0	41.639	274730000	9	DAG1	Q14118	Dystroglycan;Alpha-dystroglycan;Beta-dystroglycan	Q14118
27.0427	NaN	NaN	NaN	25.7282	NaN	NaN	NaN	8	8	8	23.4	23.4	23.4	47.064	0	66.901	193830000	9	FLOT2	Q14254	Flotillin-2	Q14254
28.1822	NaN	NaN	NaN	24.2656	24.1664	NaN	NaN	4	4	4	16.8	16.8	16.8	30.688	0	41.682	343560000	9	OAF	Q86UD1	Out at first protein homolog	Q86UD1
26.952	NaN	NaN	NaN	25.0983	23.97	NaN	NaN	4	4	4	8.2	8.2	8.2	54.705	0	26.644	182180000	9	PLD3	Q8IV08	Phospholipase D3	Q8IV08
28.3711	NaN	NaN	NaN	27.3769	22.6005	NaN	NaN	4	4	4	6.4	6.4	6.4	80.123	0	102.25	527830000	9	SLC44A2	Q8IWA5	Choline transporter-like protein 2	Q8IWA5
27.3489	NaN	NaN	NaN	NaN	22.5275	NaN	NaN	7	7	6	10.8	10.8	9.7	85.869	0	45.858	176990000	9	CPXM2	Q8N436	Inactive carboxypeptidase-like protein X2	Q8N436
27.3476	NaN	NaN	NaN	24.4438	20.9865	20.2656	NaN	6	5	5	12.8	11.1	11.1	61.174	0	47.633	196940000	9	EHD4	Q9H223	EH domain-containing protein 4	Q9H223
28.8875	NaN	NaN	NaN	NaN	24.4782	NaN	NaN	7	7	7	25.6	25.6	25.6	42.2	0	68.417	519960000	9	NPHS2	Q9NP85	Podocin	Q9NP85
29.5774	NaN	NaN	NaN	27.9465	23.6652	NaN	NaN	4	4	4	16.9	16.9	16.9	23.906	0	30.277	1073100000	9	CHMP2B	Q9UQN3;Q92828	Charged multivesicular body protein 2b	Q9UQN3
28.2132	NaN	NaN	NaN	26.0481	22.9416	NaN	NaN	4	4	4	7.6	7.6	7.6	77.737	0	39.436	388630000	9	GPR56	Q9Y653	G-protein coupled receptor 56;GPR56 N-terminal fragment;GPR56 C-terminal fragment	Q9Y653
27.9721	NaN	NaN	NaN	25.8149	NaN	NaN	NaN	6	5	5	12.1	10.4	10.4	60.13	0	36.282	322320000	8	CPNE3	O75131;Q96FN4;Q96A23;O95741;Q9UBL6	Copine-3	O75131
28.9318	NaN	NaN	NaN	26.95	21.7156	NaN	NaN	5	5	5	28.3	28.3	28.3	21.868	0	79.239	645190000	8	PDCD6	O75340	Programmed cell death protein 6	O75340
26.9195	NaN	NaN	NaN	22.6588	20.7972	NaN	NaN	6	5	5	18.7	15.1	15.1	36.688	0	29.677	135370000	8	LDHA	P00338;Q6ZMR3;P07864	L-lactate dehydrogenase A chain	P00338
27.2391	NaN	NaN	NaN	25.3717	24.3102	NaN	NaN	5	5	5	18.4	18.4	18.4	39.42	0	40.877	222630000	8	ALDOA	P04075	Fructose-bisphosphate aldolase A	P04075
27.2456	20.991	NaN	NaN	25.0305	NaN	NaN	NaN	5	5	5	23.4	23.4	23.4	38.714	0	108.49	195480000	8	ANXA1	P04083	Annexin A1	P04083
27.708	NaN	NaN	NaN	22.6895	23.731	NaN	NaN	4	4	4	10.4	10.4	10.4	63.146	0	64.308	239940000	8	GPI	P06744;K7ESF4;CON__Q3ZBD7	Glucose-6-phosphate isomerase	P06744
27.1656	NaN	NaN	NaN	23.7991	22.1943	NaN	NaN	6	6	6	12.1	12.1	12.1	60.702	0	42.572	169940000	8	HEXA	P06865;A0A087WUJ7	Beta-hexosaminidase subunit alpha	P06865
30.1624	NaN	NaN	NaN	27.8217	26.1963	23.5963	22.1531	2	2	2	3.8	3.8	3.8	58.112	0	15.885	1533200000	8	PSAP	P07602	Prosaposin;Saposin-A;Saposin-B-Val;Saposin-B;Saposin-C;Saposin-D	P07602
NaN	22.7034	21.7828	21.9902	NaN	22.0657	21.7407	21.9979	3	2	2	7.3	5.8	5.8	53.651	0	13.576	26686000	8	VIM	P08670;P41219	Vimentin	P08670
30.1746	NaN	NaN	NaN	25.0819	23.5353	NaN	NaN	2	2	2	9.3	9.3	9.3	18.354	0	15.065	1259500000	8	RNASE2	P10153	Non-secretory ribonuclease	P10153
30.4872	NaN	NaN	22.3234	27.0776	27.0322	23.7026	21.2688	1	1	1	5.5	5.5	5.5	32.461	0	19.331	1805500000	8	SDC1	P18827	Syndecan-1	P18827
NaN	20.9043	20.8759	NaN	NaN	NaN	23.9742	20.6903	6	6	6	9.1	9.1	9.1	89.786	0	40.135	22059000	8	TGM1	P22735	Protein-glutamine gamma-glutamyltransferase K	P22735
25.7811	NaN	NaN	NaN	25.2459	23.0024	NaN	NaN	5	5	5	18.7	18.7	18.7	38.498	0	44.618	105850000	8	CAPG	P40121	Macrophage-capping protein	P40121
28.8682	NaN	NaN	NaN	25.7762	22.8689	NaN	NaN	4	4	4	28.4	28.4	28.4	25.809	0	180.58	555130000	8	CD81	P60033	CD81 antigen	P60033
24.1606	24.8747	24.3448	24.5157	24.4894	24.8168	24.7982	24.2705	3	3	3	20	20	20	15.164	0	20.206	197330000	8	FABP5	Q01469	Fatty acid-binding protein, epidermal	Q01469
26.5761	NaN	NaN	NaN	23.5892	23.2748	NaN	NaN	4	4	4	15.6	15.6	15.6	50.509	0	171.98	122820000	8	GGT6	Q6P531	Gamma-glutamyltransferase 6;Gamma-glutamyltransferase 6 heavy chain;Gamma-glutamyltransferase 6 light chain	Q6P531
27.4977	NaN	NaN	NaN	24.4071	24.2557	NaN	NaN	5	5	5	8.1	8.1	8.1	69.56	0	33.158	231790000	8	GALNT18	Q6P9A2	Polypeptide N-acetylgalactosaminyltransferase 18	Q6P9A2
NaN	NaN	19.9469	NaN	NaN	NaN	24.9988	NaN	7	7	7	30.2	30.2	30.2	60.54	0	62.36	34537000	8	SBSN	Q6UWP8	Suprabasin	Q6UWP8
26.6103	NaN	NaN	NaN	25.3008	19.8022	NaN	NaN	5	5	5	14.8	14.8	14.8	50.24	0	46.664	144700000	8	ENPP6	Q6UWR7	Ectonucleotide pyrophosphatase/phosphodiesterase family member 6	Q6UWR7
27.5993	NaN	NaN	NaN	26.3087	NaN	NaN	NaN	5	5	5	7.1	7.1	7.1	91.882	0	46.81	286460000	8	PROM2	Q8N271	Prominin-2	Q8N271
26.5444	NaN	NaN	NaN	NaN	23.3415	24.1069	20.7568	4	4	4	13.2	13.2	13.2	40.251	0	26.949	128340000	8	GPRC5A	Q8NFJ5	Retinoic acid-induced protein 3	Q8NFJ5
26.2525	NaN	NaN	NaN	26.0084	NaN	NaN	NaN	5	5	5	25.3	25.3	25.3	26.41	0	81.58	147450000	8	CHMP4C	Q96CF2	Charged multivesicular body protein 4c	Q96CF2
26.3681	NaN	NaN	NaN	26.0169	NaN	NaN	NaN	6	6	6	8.8	8.8	8.8	86.396	0	37.293	154510000	8	SMO	Q99835	Smoothened homolog	Q99835
28.2447	NaN	NaN	NaN	24.2913	23.0191	NaN	NaN	5	5	2	29.9	29.9	12.4	22.171	0	43.677	347080000	8	RAB1B	Q9H0U4	Ras-related protein Rab-1B	Q9H0U4
28.0035	NaN	NaN	NaN	25.9622	23.1741	20.7075	NaN	3	3	3	56.9	56.9	56.9	8.0061	0	54.568	345640000	8	GNG12	Q9UBI6	Guanine nucleotide-binding protein G(I)/G(S)/G(O) subunit gamma-12	Q9UBI6
27.1746	NaN	NaN	NaN	23.7411	22.4328	NaN	NaN	6	6	6	6.9	6.9	6.9	101.08	0	49.155	171170000	8	PCDHGC3	Q9UN70	Protocadherin gamma-C3	Q9UN70
28.5314	NaN	NaN	NaN	26.3576	24.733	NaN	NaN	2	2	2	30.6	30.6	30.6	10.657	0	89.812	501860000	7	IGHV3OR16-9	A0A0B4J2B5;A0A0J9YX35		A0A0B4J2B5;A0A0J9YX35
26.5878	NaN	NaN	NaN	22.0257	21.4076	20.5597	NaN	4	4	4	17.3	17.3	17.3	27.887	0	25.919	109460000	7	PSMA7;PSMA8	O14818;Q8TAA3	Proteasome subunit alpha type-7;Proteasome subunit alpha type-7-like	O14818;Q8TAA3
29.9535	NaN	NaN	NaN	27.8713	25.3355	22.5078	NaN	1	1	1	5.4	5.4	5.4	26.301	0	22.005	1333500000	7	TSPAN1	O60635	Tetraspanin-1	O60635
27.0333	NaN	NaN	NaN	24.0687	NaN	18.9838	NaN	6	5	5	21.8	18.9	18.9	31.121	0	40.891	155470000	7	DDAH1	O94760	N(G),N(G)-dimethylarginine dimethylaminohydrolase 1	O94760
26.9727	NaN	NaN	NaN	24.9947	20.5147	NaN	NaN	3	3	1	16.9	16.9	4.8	21.298	0	23.73	166630000	7	HRAS	P01112;P01116	GTPase HRas;GTPase HRas, N-terminally processed	P01112
26.9696	NaN	NaN	NaN	24.4678	22.531	NaN	NaN	8	2	2	37.3	12.5	12.5	35.94	0	59.756	160690000	7	IGHG4	P01861	Ig gamma-4 chain C region	P01861
27.2164	NaN	NaN	NaN	24.5843	23.2902	NaN	NaN	4	4	4	10.7	10.7	10.7	53.688	0	25.296	191360000	7	FUCA1	P04066	Tissue alpha-L-fucosidase	P04066
28.5299	NaN	NaN	NaN	25.8427	24.0763	20.9942	NaN	19	2	2	47.7	4.7	4.7	57.706	0	18.685	467530000	7	AMY2A	P04746	Pancreatic alpha-amylase	P04746
26.985	NaN	NaN	NaN	25.1994	21.398	NaN	NaN	3	3	3	12.5	12.5	12.5	35.061	0	23.078	174120000	7	ATP1B1	P05026	Sodium/potassium-transporting ATPase subunit beta-1	P05026
26.5346	25.1269	NaN	NaN	23.0185	NaN	NaN	NaN	3	3	3	31.2	31.2	31.2	10.834	0	41.444	142350000	7	S100A8	P05109	Protein S100-A8;Protein S100-A8, N-terminally processed	P05109
27.341	NaN	NaN	NaN	24.1912	NaN	NaN	NaN	4	4	4	16.5	16.5	16.5	30.025	0	68.962	189170000	7	CALB1	P05937;P22676	Calbindin	P05937
27.0524	NaN	NaN	NaN	22.5144	22.2411	NaN	NaN	3	3	3	10.1	10.1	10.1	37.393	0	46.181	150130000	7	CTSH	P09668	Pro-cathepsin H;Cathepsin H mini chain;Cathepsin H;Cathepsin H heavy chain;Cathepsin H light chain	P09668
27.062	NaN	NaN	NaN	22.4766	NaN	NaN	NaN	6	6	6	19.8	19.8	19.8	36.375	0	45.269	145950000	7	ANXA3	P12429	Annexin A3	P12429
28.6045	NaN	NaN	NaN	NaN	25.5654	NaN	NaN	3	3	3	3.4	3.4	3.4	136.38	0	63.635	457780000	7	NID1	P14543	Nidogen-1	P14543
27.7117	NaN	NaN	NaN	NaN	24.7564	NaN	NaN	6	6	6	24.1	24.1	24.1	43.92	0	224.21	248160000	7	B4GALT1	P15291	Beta-1,4-galactosyltransferase 1;Lactose synthase A protein;N-acetyllactosamine synthase;Beta-N-acetylglucosaminylglycopeptide beta-1,4-galactosyltransferase;Beta-N-acetylglucosaminyl-glycolipid beta-1,4-galactosyltransferase;Processed beta-1,4-galactosyltransferase 1	P15291
27.0726	NaN	NaN	NaN	23.5527	21.7584	NaN	NaN	6	6	6	24.8	24.8	24.8	28.977	0	46.401	156990000	7	HPGD	P15428	15-hydroxyprostaglandin dehydrogenase [NAD(+)]	P15428
26.4339	NaN	NaN	NaN	23.5601	23.2241	NaN	NaN	4	4	4	9.4	9.4	9.4	53.383	0	26.409	112820000	7	LBP	P18428	Lipopolysaccharide-binding protein	P18428
26.7295	NaN	NaN	18.3976	23.3643	21.9557	NaN	18.2784	5	5	5	20.1	20.1	20.1	36.426	0	46.645	126800000	7	MDH1	P40925	Malate dehydrogenase, cytoplasmic	P40925
27.5296	NaN	NaN	NaN	24.77	NaN	NaN	NaN	6	6	6	41.9	41.9	41.9	23.897	0	67.303	222360000	7	RAB14	P61106	Ras-related protein Rab-14	P61106
27.8432	NaN	NaN	NaN	26.5444	21.3663	NaN	NaN	12	6	6	45	23.8	23.8	37.377	0	39.348	341360000	7	GNB1	P62873;P16520	Guanine nucleotide-binding protein G(I)/G(S)/G(T) subunit beta-1	P62873
27.4295	NaN	NaN	NaN	25.4175	NaN	NaN	NaN	3	3	3	28.1	28.1	28.1	15.931	0	29.385	225580000	7	RBP5	P82980	Retinol-binding protein 5	P82980
25.7771	NaN	NaN	NaN	NaN	NaN	21.9784	20.0823	6	6	6	9.9	9.9	9.9	91.88	0	37.966	62742000	7	EPS8	Q12929	Epidermal growth factor receptor kinase substrate 8	Q12929
27.0606	NaN	NaN	NaN	22.887	22.8177	NaN	NaN	5	5	5	7.9	7.9	7.9	79.676	0	31.569	155130000	7	GAS6	Q14393	Growth arrest-specific protein 6	Q14393
26.2748	23.1992	23.6289	23.278	NaN	23.6701	25.587	23.3174	1	1	1	3.2	3.2	3.2	26.238	0.0039164	6.2852	188170000	7	XP32	Q5T750	Skin-specific protein 32	Q5T750
31.6785	NaN	NaN	NaN	24.6678	27.2588	30.0677	NaN	1	1	1	1.4	1.4	1.4	72.148	0.0013532	6.6581	4749500000	7	CREBRF	Q8IUR6	CREB3 regulatory factor	Q8IUR6
28.0382	NaN	NaN	NaN	24.1096	21.4362	NaN	NaN	4	4	4	21.4	21.4	21.4	23.382	0	24.553	296580000	7	NT5C	Q8TCD5	5(3)-deoxyribonucleotidase, cytosolic type	Q8TCD5
29.2471	NaN	NaN	22.5267	28.2109	25.7749	24.0829	22.7941	2	2	2	11.3	11.3	11.3	10.631	0	20.53	1036400000	7	CYSTM1	Q9H1C7	Cysteine-rich and transmembrane domain-containing protein 1	Q9H1C7
29.4546	NaN	NaN	NaN	27.8204	NaN	NaN	NaN	3	3	3	8.1	8.1	8.1	53.178	0	57.833	972760000	7	RHCG	Q9UBD6	Ammonium transporter Rh type C	Q9UBD6
24.7826	NaN	NaN	NaN	25.3824	NaN	NaN	NaN	5	5	5	12.5	12.5	12.5	67.196	0	52.742	72599000	7	SPAST	Q9UBP0	Spastin	Q9UBP0
26.2481	NaN	NaN	NaN	21.7275	NaN	22.1931	20.2597	6	6	6	13.8	13.8	13.8	60.867	0	50.536	89223000	7	BAIAP2	Q9UQB8	Brain-specific angiogenesis inhibitor 1-associated protein 2	Q9UQB8
27.0935	NaN	NaN	NaN	24.8339	22.8881	NaN	21.2734	3	3	3	30.1	30.1	30.1	15.799	0	32.253	183400000	6	CST3	P01034	Cystatin-C	P01034
28.5056	NaN	NaN	20.5157	NaN	25.739	23.2262	20.8902	9	3	3	44.7	23.5	23.5	36.591	0	56.04	450370000	6	IGHA2	P01877	Ig alpha-2 chain C region	P01877
26.6675	NaN	NaN	NaN	24.5737	23.0053	NaN	NaN	2	2	2	21.7	21.7	21.7	9.3318	0	14.938	139980000	6	APOC1	P02654	Apolipoprotein C-I;Truncated apolipoprotein C-I	P02654
24.9256	21.7471	NaN	NaN	NaN	NaN	23.9276	NaN	4	4	4	10.7	10.7	10.7	44.552	0	25.948	51345000	6	CTSD	P07339;A0A1B0GU03	Cathepsin D;Cathepsin D light chain;Cathepsin D heavy chain	P07339;A0A1B0GU03
26.9904	NaN	NaN	NaN	NaN	22.0713	NaN	NaN	6	6	6	4.5	4.5	4.5	167.55	0	64.907	137740000	6	COL4A2	P08572	Collagen alpha-2(IV) chain;Canstatin	P08572
26.8975	NaN	NaN	NaN	NaN	22.3808	NaN	NaN	3	3	3	12.8	12.8	12.8	39.724	0	38.886	130470000	6	ADH5	P11766	Alcohol dehydrogenase class-3	P11766
25.7917	NaN	NaN	NaN	22.9996	21.8977	NaN	NaN	2	2	2	4.7	4.7	4.7	54.548	0	47.735	70381000	6	PEPD	P12955	Xaa-Pro dipeptidase	P12955
26.6495	NaN	NaN	NaN	24.0338	21.8655	NaN	NaN	3	3	3	9.6	9.6	9.6	35.032	0	20.087	126270000	6	CA4	P22748	Carbonic anhydrase 4	P22748
26.9884	NaN	NaN	NaN	24.5959	23.0424	20.408	NaN	4	4	4	19	19	19	23.742	0	23.929	168530000	6	PPIB	P23284	Peptidyl-prolyl cis-trans isomerase B	P23284
26.329	NaN	NaN	NaN	23.4285	19.8618	NaN	NaN	2	2	2	14.1	14.1	14.1	22.119	0	20.128	96539000	6	BLVRB	P30043	Flavin reductase (NADPH)	P30043
NaN	19.0618	18.9802	19.5314	NaN	19.3473	19.6354	19.1501	1	1	1	5.4	5.4	5.4	23.577	0.002649	6.4401	3885400	6	RPL13A	P40429	60S ribosomal protein L13a	P40429
NaN	23.0499	23.5347	NaN	23.6026	23.4989	22.7993	23.2266	1	1	1	2	2	2	49.541	0	7.2366	62542000	6	TUFM	P49411	Elongation factor Tu, mitochondrial	P49411
27.4514	NaN	NaN	NaN	25.6623	22.619	NaN	NaN	2	2	2	11	11	11	21.258	0	14.723	243080000	6	CDC42	P60953	Cell division control protein 42 homolog	P60953
28.1704	NaN	NaN	NaN	24.4948	24.3104	NaN	NaN	3	3	3	35.3	35.3	35.3	13.714	0	27.525	346530000	6	B2M	P61769	Beta-2-microglobulin;Beta-2-microglobulin form pI 5.3	P61769
NaN	NaN	NaN	NaN	26.0997	25.5869	22.9261	NaN	9	1	1	25.2	4.2	4.2	42.051	0	25.171	130280000	6	ACTA1;ACTC1;ACTG2;ACTA2	P68133;P68032;P63267;P62736	Actin, alpha skeletal muscle;Actin, alpha cardiac muscle 1;Actin, gamma-enteric smooth muscle;Actin, aortic smooth muscle	P68133;P68032;P63267;P62736
25.7283	NaN	NaN	NaN	22.2682	21.0992	NaN	NaN	5	5	5	6.7	6.7	6.7	113.32	0	36.199	62887000	6	CNTN1	Q12860	Contactin-1	Q12860
27.6237	NaN	NaN	NaN	23.9457	22.9801	NaN	NaN	4	4	4	18.3	18.3	18.3	40.876	0	39.91	231230000	6	QPCT	Q16769	Glutaminyl-peptide cyclotransferase	Q16769
27.5393	NaN	NaN	NaN	25.5276	NaN	NaN	NaN	3	3	3	6	6	6	67.646	0	40.928	243420000	6	SLC5A12	Q1EHB4	Sodium-coupled monocarboxylate transporter 2	Q1EHB4
25.2666	NaN	NaN	NaN	24.3562	NaN	NaN	NaN	4	4	4	4.8	4.8	4.8	106.16	0	25.859	61839000	6	ANO6	Q4KMQ2	Anoctamin-6	Q4KMQ2
25.8055	NaN	NaN	NaN	24.7983	NaN	NaN	NaN	6	6	6	15	15	15	53.444	0	43.435	87822000	6	ULK3	Q6PHR2	Serine/threonine-protein kinase ULK3	Q6PHR2
NaN	NaN	NaN	NaN	27.2505	NaN	NaN	NaN	6	6	6	14.9	14.9	14.9	52.441	0	48.161	159670000	6	BPIFB1	Q8TDL5	BPI fold-containing family B member 1	Q8TDL5
26.4725	NaN	NaN	NaN	NaN	22.3374	NaN	NaN	5	5	5	10.2	10.2	10.2	57.741	0	39.835	98412000	6	PVRL2	Q92692	Nectin-2	Q92692
26.2246	NaN	NaN	NaN	24.8625	23.2938	NaN	NaN	4	4	4	21	21	21	22.345	0	22.766	119200000	6	ABHD14B	Q96IU4	Alpha/beta hydrolase domain-containing protein 14B	Q96IU4
27.0717	NaN	NaN	NaN	26.1155	24.7002	NaN	NaN	1	1	1	2.5	2.5	2.5	68.53	0	9.7652	241020000	6	ZNF578	Q96N58	Zinc finger protein 578	Q96N58
NaN	20.7639	NaN	NaN	NaN	NaN	25.2507	NaN	5	5	5	12.8	12.8	12.8	46.276	0	34.616	41704000	6	SERPINB12	Q96P63	Serpin B12	Q96P63
26.498	NaN	NaN	NaN	23.5846	NaN	NaN	NaN	3	3	3	21.5	21.5	21.5	18.617	0	74.623	107350000	6	RARRES2	Q99969	Retinoic acid receptor responder protein 2	Q99969
26.5488	NaN	NaN	NaN	24.074	NaN	NaN	NaN	4	4	4	6.5	6.5	6.5	92.462	0	28.703	115830000	6	ACE2	Q9BYF1	Angiotensin-converting enzyme 2;Processed angiotensin-converting enzyme 2	Q9BYF1
25.4709	NaN	NaN	NaN	24.4651	20.2877	NaN	NaN	4	4	4	6.2	6.2	6.2	96.385	0	33.61	70944000	6	ATP6V0A4	Q9HBG4	V-type proton ATPase 116 kDa subunit a isoform 4	Q9HBG4
30.4308	NaN	NaN	NaN	28.4322	22.5324	NaN	NaN	1	1	1	2.3	2.3	2.3	39.219	0.0013587	6.7559	1815700000	6	RASSF1	Q9NS23	Ras association domain-containing protein 1	Q9NS23
26.021	NaN	NaN	NaN	23.2999	21.9179	20.2466	NaN	3	3	3	7.1	7.1	7.1	54.341	0	19.303	83624000	6	DPP7	Q9UHL4	Dipeptidyl peptidase 2	Q9UHL4
29.1884	NaN	NaN	21.419	26.9955	26.1965	23.9069	NaN	1	1	1	10.8	10.8	10.8	13.085	0	22.555	840990000	5	IGKV A18;IGKV2D-26;IGKV2D-30;IGKV2D-29;IGKV2D-28;IGKV2-40	A2NJV5;A0A0A0MRZ7;A0A075B6S6;A0A075B6S2;A0A075B6P5;A0A087WW87;P06310;P01615;P01614	Ig kappa chain V-II region RPMI 6410;Ig kappa chain V-II region FR;Ig kappa chain V-II region Cum	A2NJV5;A0A0A0MRZ7;A0A075B6S6;A0A075B6S2;A0A075B6P5;A0A087WW87;P06310;P01615;P01614
28.2924	NaN	NaN	NaN	25.9764	24.8283	23.0093	20.848	1	1	1	5.9	5.9	5.9	13.203	0.003866	6.1883	434900000	5	IGHV3-72;IGHV3-73;IGHV3-15	A0A0B4J1Y9;A0A0B4J1V6;A0A0B4J1V0		A0A0B4J1Y9;A0A0B4J1V6;A0A0B4J1V0
26.0477	NaN	NaN	NaN	24.7835	NaN	NaN	NaN	3	3	3	4.3	4.3	4.3	92.386	0	65.723	98246000	5	CHMP4A	E9PSI1;Q9BY43	Charged multivesicular body protein 4a	E9PSI1;Q9BY43
27.9272	NaN	NaN	NaN	NaN	NaN	NaN	NaN	6	6	6	7.8	7.8	7.8	121.68	0	52.94	255220000	5	MYO1C	O00159	Unconventional myosin-Ic	O00159
26.2191	NaN	NaN	NaN	25.8724	NaN	NaN	NaN	3	3	3	12.3	12.3	12.3	37.231	0	27.05	139540000	5	AQP7;AQP7P3	O14520;A6NL99;A0A075B734	Aquaporin-7;Putative aquaporin-7-like protein 3	O14520;A6NL99
26.2993	NaN	NaN	NaN	22.9509	NaN	NaN	NaN	4	4	4	9.8	9.8	9.8	73.168	0	46.843	90691000	5	CAPN5	O15484	Calpain-5	O15484
27.2006	NaN	NaN	NaN	27.3095	NaN	NaN	NaN	3	3	3	11.9	11.9	11.9	28.017	0	21.057	320580000	5	TSPAN3	O60637	Tetraspanin-3	O60637
NaN	20.6655	20.4055	NaN	NaN	NaN	23.8067	NaN	3	3	3	17.6	17.6	17.6	21.007	0	26.711	17725000	5	GGCT	O75223;M0QZK8	Gamma-glutamylcyclotransferase	O75223
26.9163	NaN	NaN	NaN	NaN	21.4215	NaN	NaN	3	3	3	8.4	8.4	8.4	54.861	0	27.21	129460000	5	ALDH1A1	P00352	Retinal dehydrogenase 1	P00352
25.9677	NaN	NaN	NaN	22.3116	22.9385	NaN	NaN	2	2	2	5.9	5.9	5.9	45.205	0	15.095	78869000	5	HP	P00738	Haptoglobin;Haptoglobin alpha chain;Haptoglobin beta chain	P00738
27.5825	NaN	NaN	NaN	24.8688	22.871	NaN	NaN	1	1	1	13.7	13.7	13.7	12.848	0	18.884	239290000	5		P01594;P01593	Ig kappa chain V-I region AU;Ig kappa chain V-I region AG	P01594;P01593
NaN	23.2427	23.4461	NaN	NaN	NaN	23.1869	NaN	3	3	3	9.9	9.9	9.9	34.735	0	21.909	30902000	5	ARG1	P05089	Arginase-1	P05089
26.2258	NaN	NaN	NaN	24.632	NaN	NaN	NaN	4	4	4	8.6	8.6	8.6	57.304	0	31.277	104480000	5	ALPL	P05186	Alkaline phosphatase, tissue-nonspecific isozyme	P05186
26.4731	NaN	NaN	NaN	22.7869	22.7785	NaN	NaN	3	3	3	5.8	5.8	5.8	57.07	0	19.401	107580000	5	SERPIND1	P05546	Heparin cofactor 2	P05546
24.5132	24.3355	NaN	NaN	NaN	NaN	NaN	NaN	2	2	2	24.6	24.6	24.6	13.242	0	17.329	45115000	5	S100A9	P06702	Protein S100-A9	P06702
27.0388	NaN	NaN	NaN	24.7612	23.8853	NaN	NaN	2	2	2	8.3	8.3	8.3	37.821	0	20.379	181810000	5	CTSB	P07858	Cathepsin B;Cathepsin B light chain;Cathepsin B heavy chain	P07858
26.5257	NaN	NaN	NaN	22.7183	NaN	NaN	NaN	3	3	3	3.7	3.7	3.7	74.731	0	18.568	103510000	5	GUSB	P08236	Beta-glucuronidase	P08236
27.4056	NaN	NaN	NaN	23.8337	NaN	NaN	NaN	4	4	4	17.6	17.6	17.6	40.076	0	67.459	192740000	5	CD14	P08571	Monocyte differentiation antigen CD14;Monocyte differentiation antigen CD14, urinary form;Monocyte differentiation antigen CD14, membrane-bound form	P08571
26.5218	NaN	NaN	NaN	24.7626	21.6709	NaN	NaN	4	4	3	23.4	23.4	16.1	23.48	0	69.958	128150000	5	RRAS	P10301	Ras-related protein R-Ras	P10301
25.8955	NaN	NaN	19.6718	NaN	NaN	NaN	19.3693	7	5	5	13.1	9.6	9.6	72.332	0	33.86	63930000	5	HSPA5	P11021	78 kDa glucose-regulated protein	P11021
26.1762	NaN	NaN	NaN	22.9799	21.7779	NaN	NaN	2	2	2	4.8	4.8	4.8	45.302	0	17.848	87697000	5	PVR	P15151	Poliovirus receptor	P15151
NaN	NaN	NaN	21.1069	NaN	24.6633	22.9787	21.7604	9	1	1	15.1	1.7	1.7	71.027	0	10.55	40648000	5	HSPA6;HSPA7	P17066;P48741	Heat shock 70 kDa protein 6;Putative heat shock 70 kDa protein 7	P17066;P48741
26.062	NaN	NaN	NaN	23.0279	NaN	NaN	NaN	5	5	5	7.5	7.5	7.5	101.39	0	37.77	78608000	5	ITIH1	P19827;CON__Q0VCM5	Inter-alpha-trypsin inhibitor heavy chain H1	P19827
27.8569	NaN	NaN	NaN	26.2001	23.5299	22.4502	20.7223	1	1	1	5.3	5.3	5.3	23.461	0	11.99	339750000	5	RAB6B;RAB6A;RAB39A	Q9NRW1;P20340;Q14964	Ras-related protein Rab-6B;Ras-related protein Rab-6A;Ras-related protein Rab-39A	Q9NRW1;P20340;Q14964
26.2799	NaN	NaN	NaN	21.4784	20.1953	NaN	NaN	4	4	4	6.1	6.1	6.1	98.398	0	25.615	85601000	5	ACO1	P21399	Cytoplasmic aconitate hydratase	P21399
26.1496	NaN	NaN	NaN	23.5371	NaN	NaN	NaN	6	3	3	29.4	18.4	18.4	27.764	0	51.901	86615000	5	YWHAQ	P27348;Q04917	14-3-3 protein theta	P27348
25.2993	NaN	NaN	NaN	25.3927	21.0581	NaN	NaN	5	5	3	18.9	18.9	11.4	42.123	0	35.057	87527000	5	GNA11	P29992;O95837	Guanine nucleotide-binding protein subunit alpha-11	P29992
27.2071	NaN	NaN	NaN	NaN	22.1704	NaN	NaN	4	4	4	11.6	11.6	11.6	53.082	0	51.817	159660000	5	SHMT1	P34896	Serine hydroxymethyltransferase, cytosolic	P34896
24.7265	NaN	NaN	NaN	23.5505	NaN	NaN	NaN	4	4	4	10.5	10.5	10.5	58.253	0	26.974	40046000	5	FRK	P42685	Tyrosine-protein kinase FRK	P42685
27.1047	NaN	NaN	NaN	22.1344	21.3162	NaN	NaN	3	3	3	16.2	16.2	16.2	23.207	0	24.933	151530000	5	ARHGDIA	P52565	Rho GDP-dissociation inhibitor 1	P52565
26.3026	NaN	NaN	NaN	25.6269	21.8411	NaN	NaN	3	2	2	19.6	11.8	11.8	23.399	0	22.442	138340000	5	RRAS2	P62070	Ras-related protein R-Ras2	P62070
26.9793	NaN	NaN	NaN	24.2305	23.4359	NaN	NaN	3	3	3	14.7	14.7	14.7	34.001	0	32.115	163340000	5	FCN2	Q15485	Ficolin-2	Q15485
25.7584	NaN	23.0059	NaN	NaN	NaN	24.5463	NaN	3	3	3	8.9	8.9	8.9	51.522	0	22.997	89686000	5	CDSN	Q15517	Corneodesmosin	Q15517
24.9528	NaN	NaN	NaN	26.4973	NaN	NaN	NaN	3	3	3	9.7	9.7	9.7	48.635	0	25.121	127200000	5	STK11	Q15831	Serine/threonine-protein kinase STK11	Q15831
26.8618	NaN	NaN	NaN	NaN	NaN	NaN	NaN	5	5	5	13.4	13.4	13.4	58.946	0	41.593	121960000	5	DAK	Q3LXA3	Bifunctional ATP-dependent dihydroxyacetone kinase/FAD-AMP lyase (cyclizing);ATP-dependent dihydroxyacetone kinase;FAD-AMP lyase (cyclizing)	Q3LXA3
27.9063	NaN	NaN	NaN	27.2984	24.3133	NaN	NaN	2	2	2	8.4	8.4	8.4	34.607	0	45.621	437470000	5	TMBIM1	Q969X1	Protein lifeguard 3	Q969X1
25.8978	NaN	NaN	NaN	24.5401	NaN	NaN	NaN	4	4	4	12.9	12.9	12.9	47.026	0	39.291	86915000	5	STRADB	Q9C0K7	STE20-related kinase adapter protein beta	Q9C0K7
24.8402	NaN	NaN	NaN	24.9098	NaN	NaN	NaN	3	3	3	9.2	9.2	9.2	48.486	0	21.77	61557000	5	PACSIN3	Q9UKS6	Protein kinase C and casein kinase substrate in neurons protein 3	Q9UKS6
27.3567	NaN	NaN	NaN	23.5006	21.2145	NaN	NaN	4	4	4	14.4	14.4	14.4	35.419	0	25.462	186170000	5	CRYL1	Q9Y2S2	Lambda-crystallin homolog	Q9Y2S2
26.3569	NaN	NaN	NaN	24.3179	NaN	NaN	NaN	4	4	4	9.2	9.2	9.2	71.45	0	41.268	106860000	5	CD2AP	Q9Y5K6	CD2-associated protein	Q9Y5K6
27.0327	NaN	NaN	NaN	24.8251	24.0261	24.5784	NaN	1	1	1	10.8	10.8	10.8	13.079	0	8.8219	209150000	4	IGKV2-24;IGKV2D-24	A0A0C4DH68;A0A075B6R9		A0A0C4DH68;A0A075B6R9
NaN	NaN	NaN	NaN	24.973	24.5584	NaN	22.7894	2	2	2	9.4	9.4	9.4	18.552	0	11.566	64888000	4	HIST1H2AJ;HIST1H2AH;H2AFV;H2AFZ;H2AFJ;HIST2H2AC;HIST1H2AC;HIST3H2A;HIST2H2AA3;HIST1H2AD;HIST1H2AG;HIST1H2AB;HIST1H2AA;H2AFX;HIST2H2AB	A0A0U1RRH7;Q99878;Q96KK5;Q71UI9;P0C0S5;Q9BTM1;Q16777;Q93077;Q7L7L0;Q6FI13;P20671;P0C0S8;P04908;Q96QV6;P16104;Q8IUE6	Histone H2A type 1-J;Histone H2A type 1-H;Histone H2A.V;Histone H2A.Z;Histone H2A.J;Histone H2A type 2-C;Histone H2A type 1-C;Histone H2A type 3;Histone H2A type 2-A;Histone H2A type 1-D;Histone H2A type 1;Histone H2A type 1-B/E;Histone H2A type 1-A;Histone H2AX;Histone H2A type 2-B	A0A0U1RRH7;Q99878;Q96KK5;Q71UI9;P0C0S5;Q9BTM1;Q16777;Q93077;Q7L7L0;Q6FI13;P20671;P0C0S8;P04908;Q96QV6;P16104;Q8IUE6
28.135	NaN	NaN	NaN	25.2411	NaN	NaN	NaN	3	3	3	20.7	20.7	20.7	19.438	0	41.653	334420000	4	UPK2	O00526	Uroplakin-2	O00526
25.7726	NaN	NaN	NaN	22.0704	NaN	NaN	NaN	4	4	4	3.9	3.9	3.9	135.07	0	24.182	61728000	4	CHL1	O00533	Neural cell adhesion molecule L1-like protein;Processed neural cell adhesion molecule L1-like protein	O00533
25.7894	NaN	NaN	NaN	22.9666	21.7016	NaN	NaN	2	2	2	6.7	6.7	6.7	41.496	0	13.868	69602000	4	CLN5	O75503	Ceroid-lipofuscinosis neuronal protein 5	O75503
25.2752	NaN	NaN	NaN	22.8291	NaN	NaN	NaN	3	3	3	33.9	33.9	33.9	13.331	0	24.408	48057000	4	SNCG	O76070	Gamma-synuclein	O76070
29.7782	NaN	NaN	NaN	26.2209	23.6122	NaN	NaN	2	2	2	21.6	21.6	21.6	12.557	0	71.828	1011800000	4	IGKV3D-20	P01619;A0A0C4DH25	Ig kappa chain V-III region B6	P01619;A0A0C4DH25
28.4963	NaN	NaN	NaN	26.1614	25.246	NaN	NaN	2	2	2	20.9	20.9	20.9	12.496	0	18.805	493500000	4	IGKV3D-15;IGKV3OR2-268;IGKV3-7;IGKV3D-7	P01624;A0A087WSY6;A0A0C4DH90;A0A075B6H7;A0A0C4DH55	Ig kappa chain V-III region POM	P01624;A0A087WSY6;A0A0C4DH90;A0A075B6H7;A0A0C4DH55
26.0596	NaN	NaN	NaN	24.4423	NaN	NaN	NaN	3	3	3	21.8	21.8	21.8	14.858	0	19.473	92734000	4	FABP3	P05413;P02689	Fatty acid-binding protein, heart	P05413
28.1528	NaN	NaN	NaN	25.1449	23.9014	NaN	NaN	2	2	2	14.9	14.9	14.9	13.38	0	15.669	351190000	4	IGKV4-1	P06312	Ig kappa chain V-IV region	P06312
25.1913	NaN	NaN	NaN	26.2025	NaN	NaN	NaN	3	3	3	6.5	6.5	6.5	44.882	0	19.837	115530000	4	LAMP1	P11279	Lysosome-associated membrane glycoprotein 1	P11279
24.3535	NaN	NaN	NaN	NaN	21.622	NaN	NaN	4	4	4	1.7	1.7	1.7	274.37	0	22.897	24662000	4	IGF2R	P11717	Cation-independent mannose-6-phosphate receptor	P11717
24.9746	NaN	NaN	NaN	21.9031	21.3629	NaN	NaN	2	2	2	4.1	4.1	4.1	59.807	0	13.464	39587000	4	NPR3	P17342	Atrial natriuretic peptide receptor 3	P17342
25.1395	NaN	NaN	NaN	21.1325	20.579	NaN	NaN	4	4	4	5.6	5.6	5.6	117.85	0	30.991	40826000	4	UBA1	P22314	Ubiquitin-like modifier-activating enzyme 1	P22314
24.6362	NaN	NaN	NaN	24.4278	NaN	NaN	NaN	3	3	3	17.3	17.3	17.3	22.086	0	19.356	48644000	4	PRDX5	P30044	Peroxiredoxin-5, mitochondrial	P30044
25.7768	NaN	NaN	NaN	23.3195	NaN	21.9789	NaN	4	3	3	23.7	18.2	18.2	21.892	0	16.993	72089000	4	PRDX2	P32119	Peroxiredoxin-2	P32119
25.5394	NaN	NaN	NaN	22.8428	NaN	NaN	NaN	9	4	4	14.2	6	6	68.563	0	26.707	56289000	4	RDX	P35241	Radixin	P35241
25.2868	NaN	NaN	NaN	24.0537	20.8773	NaN	NaN	2	2	2	11.5	11.5	11.5	20.455	0	11.448	60273000	4	ARL3	P36405	ADP-ribosylation factor-like protein 3	P36405
25.7961	NaN	NaN	NaN	23.9286	NaN	NaN	NaN	3	3	3	10.3	10.3	10.3	28.295	0	18.808	74229000	4	CD151	P48509	CD151 antigen	P48509
26.0904	NaN	NaN	NaN	24.0816	NaN	NaN	NaN	3	3	3	15.4	15.4	15.4	27.406	0	19.162	89204000	4	ST13P4;ST13;ST13P5	Q8IZP2;P50502;Q8NFI4	Putative protein FAM10A4;Hsc70-interacting protein;Putative protein FAM10A5	Q8IZP2;P50502;Q8NFI4
26.3471	NaN	NaN	NaN	24.3814	NaN	NaN	NaN	2	2	2	14.9	14.9	14.9	20.082	0	13.151	107220000	4	ARF6	P62330	ADP-ribosylation factor 6	P62330
26.488	NaN	NaN	NaN	24.2506	NaN	NaN	NaN	2	2	2	7	7	7	38.324	0	29.874	114080000	4	SORD	Q00796	Sorbitol dehydrogenase	Q00796
22.5562	NaN	NaN	NaN	23.5271	NaN	NaN	NaN	4	4	4	5.7	5.7	5.7	109.69	0	31.701	18255000	4	PKD2	Q13563	Polycystin-2	Q13563
25.1347	NaN	NaN	NaN	NaN	NaN	23.8277	NaN	3	3	3	3.1	3.1	3.1	99.968	0	17.666	51729000	4	DSC3	Q14574	Desmocollin-3	Q14574
27.0806	NaN	NaN	NaN	26.1861	NaN	NaN	NaN	3	3	3	12.2	12.2	12.2	31.641	0	23.118	218270000	4	CYBRD1	Q53TN4	Cytochrome b reductase 1	Q53TN4
23.9457	NaN	NaN	NaN	24.6622	NaN	NaN	NaN	3	3	3	3.6	3.6	3.6	104.06	0	17.918	42707000	4	CC2D1A	Q6P1N0	Coiled-coil and C2 domain-containing protein 1A	Q6P1N0
NaN	20.1785	NaN	NaN	NaN	NaN	23.1424	NaN	2	2	2	8	8	8	30.847	0	16.327	10445000	4	NCCRP1	Q6ZVX7	F-box only protein 50	Q6ZVX7
26.3071	NaN	NaN	NaN	NaN	23.3827	NaN	NaN	2	2	2	5.7	5.7	5.7	35.385	0	12.965	93967000	4	SFRP1	Q8N474	Secreted frizzled-related protein 1	Q8N474
26.7634	NaN	NaN	NaN	25.7686	22.3728	NaN	NaN	3	3	3	5.1	5.1	5.1	64.027	0	19.378	176520000	4	FAM151A	Q8WW52	Protein FAM151A	Q8WW52
26.5737	NaN	NaN	NaN	21.8147	20.3702	NaN	NaN	3	3	3	6.9	6.9	6.9	62.216	0	21.697	104930000	4	PGLYRP2	Q96PD5;CON__ENSEMBL:ENSBTAP00000016285	N-acetylmuramoyl-L-alanine amidase	Q96PD5
25.4101	NaN	NaN	NaN	24.2485	NaN	NaN	NaN	3	3	3	15.9	15.9	15.9	19.891	0	22.039	64516000	4	PARK7	Q99497	Protein deglycase DJ-1	Q99497
26.5527	NaN	NaN	NaN	24.241	23.4731	NaN	NaN	2	2	2	9.2	9.2	9.2	30.957	0	21.296	129910000	4	PDCD1LG2	Q9BQ51	Programmed cell death 1 ligand 2	Q9BQ51
26.7048	NaN	NaN	NaN	24.4717	21.8051	NaN	NaN	2	2	2	9	9	9	26.724	0	17.287	136310000	4	BDH2	Q9BUT1	3-hydroxybutyrate dehydrogenase type 2	Q9BUT1
26.3268	NaN	NaN	NaN	NaN	20.1373	NaN	NaN	3	3	3	21.6	21.6	21.6	17.328	0	26.2	85320000	4	GGACT	Q9BVM4	Gamma-glutamylaminecyclotransferase	Q9BVM4
25.9317	NaN	NaN	NaN	22.4817	20.6213	NaN	NaN	3	3	3	6.6	6.6	6.6	62.788	0	21.938	71476000	4	ANTXR1	Q9H6X2	Anthrax toxin receptor 1	Q9H6X2
24.4557	NaN	NaN	NaN	25.5718	NaN	NaN	NaN	4	4	4	22.8	22.8	22.8	31.307	0	63.098	72886000	4	VPS37B	Q9H9H4	Vacuolar protein sorting-associated protein 37B	Q9H9H4
25.4275	NaN	NaN	NaN	23.9999	NaN	NaN	NaN	3	3	1	16.3	16.3	5.7	25.938	0	19.616	61903000	4	UBTD1	Q9HAC8	Ubiquitin domain-containing protein 1	Q9HAC8
27.3966	NaN	NaN	NaN	24.0109	23.2145	NaN	NaN	2	2	2	11.3	11.3	11.3	25.235	0	21.965	203320000	4	TMEM27	Q9HBJ8	Collectrin	Q9HBJ8
NaN	19.8337	NaN	19.8036	NaN	NaN	21.9576	NaN	2	2	2	25	25	25	11.662	0	15.951	5922400	4	S100A14	Q9HCY8	Protein S100-A14	Q9HCY8
25.7261	NaN	NaN	NaN	25.1388	NaN	NaN	NaN	2	2	2	4.4	4.4	4.4	64.166	0	13.046	92449000	4	TM7SF3	Q9NS93	Transmembrane 7 superfamily member 3	Q9NS93
27.5455	NaN	NaN	NaN	24.8623	NaN	NaN	NaN	2	2	2	9.1	9.1	9.1	46.021	0	19.857	226400000	4	B3GNT2	Q9NY97	N-acetyllactosaminide beta-1,3-N-acetylglucosaminyltransferase 2	Q9NY97
26.7303	NaN	NaN	NaN	25.458	NaN	NaN	NaN	3	3	3	11.3	11.3	11.3	30.381	0	42.78	157420000	4	PEF1	Q9UBV8	Peflin	Q9UBV8
25.0059	NaN	NaN	NaN	23.2877	NaN	NaN	NaN	2	2	2	3.8	3.8	3.8	64.83	0	11.339	43931000	4	SLC23A1	Q9UHI7	Solute carrier family 23 member 1	Q9UHI7
26.1413	NaN	NaN	NaN	22.4398	21.543	NaN	NaN	3	3	3	7	7	7	53.637	0	21.404	82757000	4	ANGPTL3	Q9Y5C1	Angiopoietin-related protein 3	Q9Y5C1
26.4564	NaN	NaN	NaN	24.5503	24.0269	NaN	NaN	1	1	1	13.9	13.9	13.9	12.332	0	80.407	133740000	3	IGLV3-9	A0A075B6K5;P80748	Ig lambda chain V-III region LOI	A0A075B6K5;P80748
25.335	NaN	NaN	NaN	21.3185	19.7084	NaN	NaN	2	2	2	26.5	26.5	26.5	12.674	0	42.59	45798000	3	IGHV5-51	A0A0C4DH38		A0A0C4DH38
25.4026	NaN	NaN	NaN	23.1625	24.5201	NaN	NaN	2	2	2	21.4	21.4	21.4	13.016	0	37.796	77802000	3	IGHV4-61;IGHV4-4;IGHV4-31	P0DP08;P0DP06;A0A0C4DH41;P01825;P06331;P01824;A0A0J9YWU9;A0A087WW49;A0A075B6R2;P0DP07;A0A087WSY4	Ig heavy chain V-II region NEWM;Ig heavy chain V-II region ARH-77;Ig heavy chain V-II region WAH	P0DP08;P0DP06;A0A0C4DH41;P01825;P06331;P01824;A0A0J9YWU9;A0A087WW49;A0A075B6R2;P0DP07;A0A087WSY4
25.928	NaN	NaN	NaN	23.0903	NaN	NaN	NaN	2	2	2	4.5	4.5	4.5	64.342	0	20.554	72770000	3	SLC5A10	A0PJK1	Sodium/glucose cotransporter 5	A0PJK1
25.8881	NaN	NaN	NaN	23.418	NaN	NaN	NaN	2	2	2	6.5	6.5	6.5	38.658	0	14.437	73309000	3	VPS37C	A5D8V6	Vacuolar protein sorting-associated protein 37C	A5D8V6
26.7838	NaN	NaN	NaN	24.5968	24.1189	NaN	NaN	1	1	1	2.1	2.1	2.1	45.118	0	7.4646	159140000	3	B4GALT5	O43286	Beta-1,4-galactosyltransferase 5	O43286
26.6371	NaN	NaN	NaN	23.4996	NaN	NaN	NaN	3	3	2	10.6	10.6	7.5	39.589	0	21.079	116230000	3	AKR7A2;AKR7L	O43488;Q8NHP1	Aflatoxin B1 aldehyde reductase member 2;Aflatoxin B1 aldehyde reductase member 4	O43488;Q8NHP1
26.1644	NaN	NaN	NaN	22.716	NaN	NaN	NaN	3	3	3	11.4	11.4	11.4	27.563	0	17.598	82097000	3	TSPAN6	O43657	Tetraspanin-6	O43657
25.1845	NaN	NaN	NaN	22.111	NaN	NaN	NaN	2	2	2	3.1	3.1	3.1	66.193	0	11.558	42661000	3	WDR1	O75083	WD repeat-containing protein 1	O75083
25.3719	NaN	NaN	NaN	24.6154	NaN	NaN	NaN	2	2	2	16.9	16.9	16.9	15.936	0	15.408	69124000	3	SOD1	P00441	Superoxide dismutase [Cu-Zn]	P00441
26.1635	NaN	NaN	NaN	NaN	NaN	NaN	NaN	3	3	3	6.3	6.3	6.3	90.568	0	26.553	75163000	3	PLG	P00747	Plasminogen;Plasmin heavy chain A;Activation peptide;Angiostatin;Plasmin heavy chain A, short form;Plasmin light chain B	P00747
NaN	NaN	NaN	NaN	22.5947	22.1373	NaN	NaN	2	2	2	5.2	5.2	5.2	53.154	0	13.447	10947000	3	AGT	P01019	Angiotensinogen;Angiotensin-1;Angiotensin-2;Angiotensin-3;Angiotensin-4;Angiotensin 1-9;Angiotensin 1-7;Angiotensin 1-5;Angiotensin 1-4	P01019
25.9085	NaN	NaN	NaN	24.3914	23.4459	NaN	NaN	1	1	1	9.4	9.4	9.4	12.781	0.0013405	6.5458	96418000	3	IGKV1-5	P01602	Ig kappa chain V-I region HK102	P01602
25.2433	NaN	NaN	NaN	21.7144	24.1721	NaN	NaN	2	2	2	22.2	22.2	22.2	12.933	0	15.621	62063000	3	IGHV1-3;IGHV1-69-2	P01743;P0DP01;A0A0C4DH29;A0A0B4J2H0;P01742	Ig heavy chain V-I region HG3;Ig heavy chain V-I region EU	P01743;P0DP01;A0A0C4DH29;A0A0B4J2H0;P01742
26.6185	NaN	NaN	NaN	25.0642	23.3606	NaN	NaN	2	1	1	17.1	7.7	7.7	12.943	0	7.286	148890000	3		P01780	Ig heavy chain V-III region JON	P01780
25.5163	NaN	NaN	NaN	22.7791	21.193	NaN	NaN	1	1	1	9.3	9.3	9.3	13.017	0	8.4868	57587000	3		P0DP04;P01782	Ig heavy chain V-III region DOB	P0DP04;P01782
26.3466	NaN	NaN	NaN	NaN	NaN	NaN	NaN	3	3	3	7.4	7.4	7.4	59.578	0	30.36	85334000	3	HRG	P04196	Histidine-rich glycoprotein	P04196
25.9604	NaN	NaN	NaN	NaN	NaN	NaN	NaN	3	3	3	13.1	13.1	13.1	28.315	0	28.579	65294000	3	CAPNS1	P04632;Q96L46	Calpain small subunit 1	P04632
27.8487	NaN	NaN	NaN	26.5582	NaN	NaN	NaN	2	2	2	16.7	16.7	16.7	10.18	0	12.217	340520000	3	S100A6	P06703	Protein S100-A6	P06703
24.9949	NaN	NaN	NaN	23.8683	NaN	NaN	NaN	4	2	2	22.3	13.6	13.6	23.408	0	13.248	48748000	3	RALB	P11234	Ras-related protein Ral-B	P11234
26.9895	NaN	NaN	NaN	24.7827	22.6686	NaN	NaN	1	1	1	7.8	7.8	7.8	12.476	0	6.8307	168770000	3	MIF	P14174	Macrophage migration inhibitory factor	P14174
25.2733	NaN	NaN	NaN	22.3592	NaN	NaN	NaN	4	2	2	27.8	10	10	20.511	0	12.718	45934000	3	ARF4	P18085	ADP-ribosylation factor 4	P18085
27.2185	NaN	NaN	NaN	24.0937	NaN	NaN	NaN	20	2	1	52.8	4.9	2.2	57.709	0	29.053	174060000	3	AMY2B	P19961	Alpha-amylase 2B	P19961
26.0387	NaN	NaN	NaN	NaN	NaN	NaN	NaN	3	3	3	10	10	10	37.567	0	20.917	68935000	3	GPD1	P21695	Glycerol-3-phosphate dehydrogenase [NAD(+)], cytoplasmic	P21695
26.2417	NaN	NaN	NaN	NaN	NaN	NaN	NaN	3	3	3	11.3	11.3	11.3	47.716	0	37.651	79347000	3	AHCY	P23526	Adenosylhomocysteinase	P23526
24.6063	NaN	NaN	NaN	NaN	21.3233	20.5204	NaN	1	1	1	3.8	3.8	3.8	29.483	0	7.2005	29669000	3	PSMA4	P25789	Proteasome subunit alpha type-4	P25789
26.0464	NaN	NaN	NaN	23.0886	21.5031	NaN	NaN	1	1	1	13.7	13.7	13.7	10.4	0	22.377	81194000	3	S100P	P25815	Protein S100-P	P25815
24.1361	NaN	NaN	NaN	23.0248	NaN	NaN	NaN	2	2	2	6.7	6.7	6.7	48.141	0	15.843	26971000	3	CALR	P27797	Calreticulin	P27797
26.3785	NaN	NaN	NaN	NaN	NaN	NaN	NaN	3	3	3	26.3	26.3	26.3	12.712	0	19.567	87242000	3	DDT;DDTL	P30046;A6NHG4	D-dopachrome decarboxylase;D-dopachrome decarboxylase-like protein	P30046;A6NHG4
25.7472	NaN	NaN	NaN	23.6814	22.384	NaN	NaN	2	2	2	2.7	2.7	2.7	98.335	0	12.356	75248000	3	AXL	P30530	Tyrosine-protein kinase receptor UFO	P30530
26.8301	NaN	NaN	NaN	24.3367	22.8612	NaN	NaN	3	1	1	10.5	3.2	3.2	27.774	0.0037927	6.0557	148110000	3	SFN	P31947	14-3-3 protein sigma	P31947
25.358	NaN	NaN	NaN	NaN	NaN	NaN	NaN	3	3	3	6.8	6.8	6.8	69.194	0	36.597	43004000	3	PCK1	P35558	Phosphoenolpyruvate carboxykinase, cytosolic [GTP]	P35558
25.4763	NaN	NaN	NaN	21.9321	21.0587	NaN	NaN	1	1	1	8.9	8.9	8.9	21.029	0	14.779	52866000	3	PTGDS	P41222	Prostaglandin-H2 D-isomerase	P41222
NaN	NaN	NaN	NaN	NaN	NaN	23.621	NaN	4	4	4	7.2	7.2	7.2	72.697	0	26.693	12901000	3	HAL	P42357	Histidine ammonia-lyase	P42357
23.1323	NaN	NaN	NaN	21.8642	19.605	NaN	NaN	2	2	2	3.4	3.4	3.4	85.664	0	17.358	13809000	3	PLCD1	P51178	1-phosphatidylinositol 4,5-bisphosphate phosphodiesterase delta-1	P51178
23.9309	NaN	NaN	NaN	23.4243	NaN	NaN	NaN	2	2	2	2.3	2.3	2.3	124.57	0	11.712	27250000	3	CACNA2D1	P54289	Voltage-dependent calcium channel subunit alpha-2/delta-1;Voltage-dependent calcium channel subunit alpha-2-1;Voltage-dependent calcium channel subunit delta-1	P54289
25.5427	NaN	NaN	NaN	NaN	21.5421	NaN	NaN	3	3	3	17.1	17.1	17.1	27.399	0	20.028	51932000	3	PSMA6	P60900	Proteasome subunit alpha type-6	P60900
24.1493	NaN	NaN	NaN	23.2248	NaN	NaN	NaN	2	2	2	17.1	17.1	17.1	17.138	0	13.051	28409000	3	UBE2N;UBE2NL	P61088;Q5JXB2	Ubiquitin-conjugating enzyme E2 N;Putative ubiquitin-conjugating enzyme E2 N-like	P61088;Q5JXB2
26.1324	NaN	NaN	NaN	23.6287	NaN	NaN	NaN	8	3	3	45.7	15.2	15.2	20.825	0	22.085	86527000	3	RAP1B	P61224;A0A0J9YXB3;A6NIZ1	Ras-related protein Rap-1b;Ras-related protein Rap-1b-like protein	P61224;A0A0J9YXB3;A6NIZ1
24.1991	NaN	NaN	NaN	23.8111	NaN	NaN	NaN	2	2	2	12	12	12	20.504	0	12.474	33979000	3	RAP2B;RAP2C;RAP2A	P61225;Q9Y3L5;P10114	Ras-related protein Rap-2b;Ras-related protein Rap-2c;Ras-related protein Rap-2a	P61225;Q9Y3L5;P10114
25.6693	NaN	NaN	NaN	NaN	NaN	NaN	NaN	5	3	3	21.1	13.8	13.8	28.302	0	28.059	53360000	3	YWHAG	P61981	14-3-3 protein gamma;14-3-3 protein gamma, N-terminally processed	P61981
25.0786	NaN	NaN	NaN	23.7777	NaN	NaN	NaN	3	2	2	20.4	11.7	11.7	22.123	0	12.419	49816000	3	RHOB	P62745	Rho-related GTP-binding protein RhoB	P62745
25.8691	NaN	NaN	NaN	22.3357	NaN	NaN	NaN	5	2	2	18.6	8.5	8.5	40.361	0	65.119	66584000	3	GNAI1	P63096;P09471;P11488;P19087;A8MTJ3	Guanine nucleotide-binding protein G(i) subunit alpha-1	P63096
25.1047	NaN	NaN	NaN	NaN	NaN	NaN	NaN	3	3	3	7.4	7.4	7.4	53.879	0	22.571	36080000	3	NUCB1	Q02818	Nucleobindin-1	Q02818
24.9807	NaN	NaN	NaN	23.7061	21.3417	NaN	NaN	1	1	1	1.9	1.9	1.9	78.851	0	7.1805	49451000	3	SLC3A1	Q07837	Neutral and basic amino acid transport protein rBAT	Q07837
25.225	NaN	NaN	NaN	22.2011	NaN	NaN	NaN	2	2	2	5.1	5.1	5.1	48.368	0	15.66	44040000	3	HYAL1	Q12794	Hyaluronidase-1	Q12794
24.6609	NaN	NaN	NaN	24.6707	NaN	NaN	NaN	1	1	1	14.9	14.9	14.9	12.227	0	42.322	53234000	3	PDZK1IP1	Q13113	PDZK1-interacting protein 1	Q13113
26.6632	NaN	NaN	NaN	NaN	22.5944	NaN	NaN	5	5	5	7.1	7.1	7.1	117.75	0	39.403	112600000	3	MBTPS1	Q14703	Membrane-bound transcription factor site-1 protease	Q14703
25.2373	NaN	NaN	NaN	21.6644	NaN	NaN	NaN	2	2	2	4.6	4.6	4.6	66.452	0	15.761	42877000	3	STXBP2	Q15833	Syntaxin-binding protein 2	Q15833
24.7103	NaN	NaN	NaN	23.6643	NaN	NaN	NaN	3	3	3	9.6	9.6	9.6	48.643	0	54.256	40744000	3	ARL13B	Q3SXY8	ADP-ribosylation factor-like protein 13B	Q3SXY8
24.2738	NaN	NaN	NaN	23.7366	NaN	NaN	NaN	2	2	2	3	3	3	61.816	0	11.435	34261000	3	SLC22A6	Q4U2R8	Solute carrier family 22 member 6	Q4U2R8
28.1618	NaN	NaN	NaN	22.6495	NaN	22.6502	21.1284	1	1	1	13	13	13	8.5403	0	36.873	315750000	3	SMIM5	Q71RC9	Small integral membrane protein 5	Q71RC9
24.997	NaN	NaN	NaN	23.9011	NaN	NaN	NaN	3	3	3	10.1	10.1	10.1	43.816	0	19.905	49150000	3	VPS36	Q86VN1	Vacuolar protein-sorting-associated protein 36	Q86VN1
24.4849	NaN	NaN	NaN	24.2122	NaN	NaN	NaN	2	2	2	9.6	9.6	9.6	30.922	0	16.125	42915000	3	TMEM192	Q8IY95	Transmembrane protein 192	Q8IY95
25.01	NaN	NaN	NaN	21.1992	22.1687	NaN	NaN	3	3	3	1.9	1.9	1.9	248.42	0	29.677	40910000	3	SORL1	Q92673	Sortilin-related receptor	Q92673
26.6979	NaN	NaN	NaN	NaN	22.0069	NaN	NaN	3	3	3	7.3	7.3	7.3	65.033	0	23.703	113070000	3	IGSF8	Q969P0	Immunoglobulin superfamily member 8	Q969P0
24.9901	NaN	NaN	NaN	24.5569	NaN	NaN	NaN	3	3	3	15.8	15.8	15.8	24.736	0	26.103	58006000	3	PLEKHB2	Q96CS7	Pleckstrin homology domain-containing family B member 2	Q96CS7
25.5917	NaN	NaN	NaN	25.3596	NaN	NaN	NaN	2	2	2	13.4	13.4	13.4	23.485	0	52.521	93619000	3	CHMP6	Q96FZ7	Charged multivesicular body protein 6	Q96FZ7
25.3636	NaN	NaN	NaN	NaN	21.0063	NaN	NaN	2	2	2	4	4	4	69.129	0	17.508	45279000	3	HS6ST2	Q96MM7	Heparan-sulfate 6-O-sulfotransferase 2	Q96MM7
NaN	NaN	NaN	NaN	24.4066	NaN	NaN	NaN	3	3	3	11.3	11.3	11.3	43.369	0	27.38	22239000	3	P2RX4	Q99571	P2X purinoceptor 4	Q99571
26.0138	NaN	NaN	NaN	22.7396	NaN	NaN	NaN	2	2	2	14.2	14.2	14.2	20.747	0	21.843	74759000	3	VPS25	Q9BRG1	Vacuolar protein-sorting-associated protein 25	Q9BRG1
25.5257	NaN	NaN	NaN	22.8653	21.9767	NaN	NaN	1	1	1	2.9	2.9	2.9	48.509	0	29.6	60074000	3	CADM1	Q9BY67	Cell adhesion molecule 1	Q9BY67
24.816	NaN	NaN	NaN	23.4631	NaN	NaN	NaN	2	2	2	8.4	8.4	8.4	30.281	0	15.294	41100000	3	TOLLIP	Q9H0E2	Toll-interacting protein	Q9H0E2
29.5418	NaN	NaN	NaN	25.9575	24.4039	NaN	NaN	1	1	1	0.3	0.3	0.3	242.37	0.0086741	5.9331	868940000	3	HEATR1	Q9H583	HEAT repeat-containing protein 1;HEAT repeat-containing protein 1, N-terminally processed	Q9H583
25.1196	NaN	NaN	NaN	22.0632	21.7962	NaN	NaN	1	1	1	9.6	9.6	9.6	13.832	0	28.986	44479000	3	PHPT1	Q9NRX4	14 kDa phosphohistidine phosphatase	Q9NRX4
26.4856	NaN	NaN	NaN	24.182	21.5625	NaN	NaN	1	1	1	2.6	2.6	2.6	34.094	0.0013298	6.5037	116090000	3	CYB5R1	Q9UHQ9	NADH-cytochrome b5 reductase 1	Q9UHQ9
26.6167	NaN	NaN	NaN	NaN	NaN	NaN	NaN	3	3	3	13	13	13	38.782	0	22.383	102900000	3	CD84	Q9UIB8	SLAM family member 5	Q9UIB8
25.4778	NaN	NaN	NaN	21.3107	20.6738	NaN	NaN	2	2	2	4.1	4.1	4.1	79.579	0	49.246	51001000	3	MAN1B1	Q9UKM7	Endoplasmic reticulum mannosyl-oligosaccharide 1,2-alpha-mannosidase	Q9UKM7
25.2864	NaN	NaN	NaN	22.7666	NaN	NaN	NaN	2	2	2	8	8	8	24.347	0	14.101	48057000	3	RAB21	Q9UL25	Ras-related protein Rab-21	Q9UL25
27.345	NaN	NaN	NaN	24.923	20.3935	20.0613	NaN	2	2	2	10.9	10.9	10.9	26.671	0	29.63	204760000	3	PROCR	Q9UNN8	Endothelial protein C receptor	Q9UNN8
26.6611	NaN	NaN	NaN	NaN	NaN	NaN	NaN	3	3	3	14.6	14.6	14.6	28.772	0	22.013	106120000	3	CLIC4	Q9Y696	Chloride intracellular channel protein 4	Q9Y696
27.9461	NaN	NaN	NaN	26.1182	NaN	NaN	NaN	1	1	1	7.8	7.8	7.8	12.625	0	7.479	331440000	2	IGKV3D-11	A0A0A0MRZ8;P04433	Ig kappa chain V-III region VG	A0A0A0MRZ8;P04433
26.6594	NaN	NaN	NaN	NaN	NaN	NaN	NaN	2	2	2	23.9	23.9	23.9	12.82	0	29.722	105990000	2	IGHV1-18	A0A0C4DH31;P23083	Ig heavy chain V-I region V35	A0A0C4DH31;P23083
25.7337	NaN	NaN	NaN	NaN	22.8405	NaN	NaN	1	1	1	9.4	9.4	9.4	12.81	0	8.3956	63308000	2	IGHV3-35	A0A0C4DH35		A0A0C4DH35
27.4766	NaN	NaN	NaN	25.9632	NaN	NaN	NaN	3	2	1	24.8	15.4	9.4	12.947	0.0062266	5.9854	252180000	2	IGHV3-23	P0DP03;A0A0J9YY99;P01768;P01764	Ig heavy chain V-III region CAM;Ig heavy chain V-III region 23	P0DP03;A0A0J9YY99;P01768;P01764
NaN	NaN	NaN	NaN	NaN	28.0046	27.5316	NaN	1	1	1	0.5	0.5	0.5	221.72	0.0037879	6.0398	463310000	2	TDRD15	B5MCY1	Tudor domain-containing protein 15	B5MCY1
24.9864	NaN	NaN	NaN	26.1105	NaN	NaN	NaN	1	1	1	1.2	1.2	1.2	66.188	0.0026316	6.3417	105690000	2	FAM227A	F5H4B4	Protein FAM227A	F5H4B4
NaN	NaN	NaN	NaN	25.0191	24.6527	NaN	NaN	1	1	1	3.5	3.5	3.5	24.968	0.0039113	6.2784	60378000	2	NXNL1	M0R296;Q96CM4	Nucleoredoxin-like protein 1	M0R296;Q96CM4
NaN	NaN	NaN	NaN	NaN	NaN	NaN	NaN	1	1	1	2.9	2.9	2.9	36.743	0	10.161	0	2	FBP2	O00757	Fructose-1,6-bisphosphatase isozyme 2	O00757
24.369	NaN	NaN	NaN	NaN	21.3845	NaN	NaN	2	2	2	6.8	6.8	6.8	45.997	0	13.949	24405000	2	ISLR	O14498	Immunoglobulin superfamily containing leucine-rich repeat protein	O14498
24.1489	NaN	NaN	NaN	22.4781	NaN	NaN	NaN	1	1	1	5.8	5.8	5.8	21.09	0	7.3189	24443000	2	SLC31A1	O15431	High affinity copper uptake protein 1	O15431
24.0126	NaN	NaN	NaN	23.631	NaN	NaN	NaN	2	2	2	3.9	3.9	3.9	66.567	0	14.604	29916000	2	TREH	O43280	Trehalase	O43280
24.204	NaN	NaN	NaN	NaN	22.5542	NaN	NaN	2	2	2	6.5	6.5	6.5	47.119	0	17.813	25484000	2	B4GAT1	O43505	Beta-1,4-glucuronyltransferase 1	O43505
24.0918	NaN	NaN	NaN	NaN	NaN	NaN	NaN	2	2	2	7.6	7.6	7.6	39.45	0	13.866	17880000	2	CA12	O43570	Carbonic anhydrase 12	O43570
24.208	NaN	NaN	NaN	NaN	21.7081	NaN	NaN	2	2	2	3.9	3.9	3.9	89.922	0	14.362	22805000	2	CDH16	O75309	Cadherin-16	O75309
NaN	NaN	NaN	NaN	NaN	NaN	22.5565	NaN	2	2	2	3.4	3.4	3.4	80.355	0	12.21	6168500	2	ALOX12B	O75342	Arachidonate 12-lipoxygenase, 12R-type	O75342
25.0435	NaN	NaN	NaN	22.8129	21.4359	NaN	NaN	1	1	1	9.3	9.3	9.3	13.757	0	10.691	44787000	2	ATP6V1G1	O75348	V-type proton ATPase subunit G 1	O75348
25.3162	NaN	NaN	NaN	NaN	NaN	NaN	NaN	3	3	3	4.3	4.3	4.3	98.828	0	17.842	41778000	2	ALDH1L1	O75891	Cytosolic 10-formyltetrahydrofolate dehydrogenase	O75891
25.4388	NaN	NaN	NaN	NaN	NaN	NaN	NaN	2	2	2	7.8	7.8	7.8	43.001	0	14.812	45481000	2	PRSS23	O95084	Serine protease 23	O95084
NaN	NaN	NaN	NaN	22.1708	NaN	NaN	NaN	1	1	1	12.8	12.8	12.8	13.157	0	9.6171	4721500	2	UBL3	O95164	Ubiquitin-like protein 3	O95164
NaN	NaN	NaN	NaN	23.6649	22.6295	NaN	NaN	1	1	1	11.1	11.1	11.1	12.283	0	7.6917	19789000	2		P01700	Ig lambda chain V-I region HA	P01700
26.3364	NaN	NaN	NaN	NaN	20.3835	NaN	NaN	2	2	2	7.1	7.1	7.1	40.908	0	16.231	86099000	2	HLA-A;HLA-C	P01891;Q95604	HLA class I histocompatibility antigen, A-68 alpha chain;HLA class I histocompatibility antigen, Cw-17 alpha chain	P01891;Q95604
25.2529	NaN	NaN	NaN	NaN	NaN	NaN	NaN	2	2	1	8.3	8.3	4.4	40.891	0	15.397	39984000	2	HLA-H	P01893	Putative HLA class I histocompatibility antigen, alpha chain H	P01893
27.214	NaN	NaN	NaN	NaN	NaN	NaN	NaN	2	2	2	30.6	30.6	30.6	15.887	0	86.931	155680000	2	TTR	P02766	Transthyretin	P02766
25.4991	NaN	NaN	NaN	NaN	NaN	NaN	NaN	2	2	2	24.5	24.5	24.5	11.139	0	12.431	47424000	2	CSTB	P04080	Cystatin-B	P04080
25.7278	NaN	NaN	NaN	NaN	NaN	NaN	NaN	5	2	2	17.7	7.6	7.6	40.45	0	22.506	55569000	2	GNAI2	P04899	Guanine nucleotide-binding protein G(i) subunit alpha-2	P04899
NaN	NaN	NaN	NaN	NaN	NaN	24.17	22.8289	1	1	1	4.7	4.7	4.7	24.425	0.0037594	6.0041	26325000	2	EDN1	P05305	Endothelin-1;Endothelin-1;Big endothelin-1	P05305
25.794	NaN	NaN	NaN	22.5159	NaN	NaN	NaN	3	3	3	7.5	7.5	7.5	48.766	0	21.667	64176000	2	GLA	P06280	Alpha-galactosidase A	P06280
25.6236	NaN	NaN	NaN	24.1626	NaN	NaN	NaN	1	1	1	8.7	8.7	8.7	14.208	0.0013643	6.8112	70477000	2	FABP1	P07148	Fatty acid-binding protein, liver	P07148
25.228	NaN	NaN	NaN	22.635	NaN	NaN	NaN	1	1	1	2.2	2.2	2.2	63.111	0	9.0561	45812000	2	HEXB	P07686	Beta-hexosaminidase subunit beta;Beta-hexosaminidase subunit beta chain B;Beta-hexosaminidase subunit beta chain A	P07686
25.2633	NaN	NaN	NaN	NaN	NaN	NaN	NaN	2	2	2	3.2	3.2	3.2	59.834	0	11.055	40273000	2	SRC;YES1;LCK;LYN;HCK;FYN	P12931;P07947;P06239;P07948;P08631;P06241	Proto-oncogene tyrosine-protein kinase Src;Tyrosine-protein kinase Yes;Tyrosine-protein kinase Lck;Tyrosine-protein kinase Lyn;Tyrosine-protein kinase HCK;Tyrosine-protein kinase Fyn	P12931;P07947;P06239;P07948;P08631;P06241
24.9268	NaN	NaN	NaN	NaN	21.1048	NaN	NaN	1	1	1	4.3	4.3	4.3	29.089	0	7.141	34150000	2	FCGR3A	P08637	Low affinity immunoglobulin gamma Fc region receptor III-A	P08637
26.5776	NaN	NaN	NaN	NaN	NaN	NaN	NaN	1	1	1	9.2	9.2	9.2	25.409	0	141.6	100150000	2	CD7	P09564	T-cell antigen CD7	P09564
25.3657	NaN	NaN	NaN	24.0314	NaN	NaN	NaN	1	1	1	5.4	5.4	5.4	35.422	0	16.096	60381000	2	SPP1	P10451	Osteopontin	P10451
25.8334	NaN	NaN	NaN	NaN	NaN	NaN	NaN	2	2	2	13.1	13.1	13.1	31.462	0	20.493	59790000	2	ESD	P10768	S-formylglutathione hydrolase	P10768
25.771	NaN	NaN	NaN	21.962	NaN	NaN	NaN	2	2	2	4.5	4.5	4.5	54.756	0	15.171	61345000	2	CETP	P11597	Cholesteryl ester transfer protein	P11597
25.3096	NaN	NaN	NaN	NaN	NaN	NaN	NaN	2	2	2	5.1	5.1	5.1	44.96	0	11.806	41585000	2	LAMP2	P13473	Lysosome-associated membrane glycoprotein 2	P13473
25.4547	NaN	NaN	NaN	NaN	NaN	NaN	NaN	2	2	2	3	3	3	70.81	0	11.516	45986000	2	PLS3;LCP1;PLS1	P13797;P13796;Q14651	Plastin-3;Plastin-2;Plastin-1	P13797;P13796;Q14651
24.6206	NaN	NaN	NaN	23.2048	NaN	NaN	NaN	1	1	1	2.3	2.3	2.3	73.497	0	51.991	35463000	2	SLC5A1	P13866	Sodium/glucose cotransporter 1	P13866
23.4768	NaN	NaN	NaN	NaN	19.6385	NaN	NaN	2	2	2	6.1	6.1	6.1	53.588	0	11.635	12490000	2	ARSA	P15289	Arylsulfatase A;Arylsulfatase A component B;Arylsulfatase A component C	P15289
25.4912	NaN	NaN	NaN	23.5708	NaN	NaN	NaN	2	2	2	4.3	4.3	4.3	56.832	0	13.654	59626000	2	ATP6V1B1	P15313	V-type proton ATPase subunit B, kidney isoform	P15313
25.6852	NaN	NaN	NaN	23.802	NaN	NaN	NaN	1	1	1	4.4	4.4	4.4	26.152	0.0013569	6.7397	68578000	2	LGALS3	P17931	Galectin-3	P17931
24.6422	NaN	NaN	NaN	NaN	NaN	NaN	NaN	2	2	2	11.1	11.1	11.1	30.037	0	22.854	26184000	2	COMT	P21964	Catechol O-methyltransferase	P21964
26.0597	NaN	NaN	NaN	22.9666	NaN	NaN	NaN	2	2	2	11.7	11.7	11.7	31.433	0	39.23	78138000	2	DNASE1	P24855	Deoxyribonuclease-1	P24855
24.9323	NaN	NaN	NaN	NaN	NaN	NaN	NaN	2	2	2	1.8	1.8	1.8	116.61	0	12.458	32016000	2	ITGA3	P26006	Integrin alpha-3;Integrin alpha-3 heavy chain;Integrin alpha-3 light chain	P26006
24.8542	NaN	NaN	NaN	24.3502	NaN	NaN	NaN	2	2	2	9.7	9.7	9.7	29.625	0	17.285	51716000	2	CD82	P27701	CD82 antigen	P27701
25.3078	NaN	NaN	NaN	21.7099	NaN	NaN	NaN	2	2	2	11.8	11.8	11.8	31.785	0	15.622	44964000	2	PBLD	P30039	Phenazine biosynthesis-like domain-containing protein	P30039
25.6062	NaN	NaN	NaN	22.0223	NaN	NaN	NaN	3	3	3	16.2	16.2	16.2	21.676	0	17.694	55336000	2	SRI	P30626	Sorcin	P30626
NaN	NaN	NaN	NaN	24.5953	NaN	NaN	NaN	2	2	2	12.5	12.5	12.5	19.25	0	14.098	25346000	2	LCN1;LCN1P1	P31025;Q5VSP4	Lipocalin-1;Putative lipocalin 1-like protein 1	P31025;Q5VSP4
NaN	24.6718	NaN	NaN	NaN	NaN	NaN	NaN	2	2	2	11.9	11.9	11.9	11.471	0	11.274	26727000	2	S100A7	P31151	Protein S100-A7	P31151
23.5823	NaN	NaN	NaN	21.9019	NaN	NaN	NaN	2	2	2	5.1	5.1	5.1	64.615	0	12.827	16478000	2	ATIC	P31939	Bifunctional purine biosynthesis protein PURH;Phosphoribosylaminoimidazolecarboxamide formyltransferase;IMP cyclohydrolase	P31939
24.9733	NaN	NaN	NaN	21.5156	NaN	NaN	NaN	1	1	1	1.7	1.7	1.7	64.066	0	7.3519	35939000	2	TRIM23	P36406	E3 ubiquitin-protein ligase TRIM23	P36406
22.7123	NaN	NaN	NaN	20.2579	NaN	NaN	NaN	1	1	1	3.1	3.1	3.1	36.983	0.0039062	6.2668	8126100	2	PPP1CC;PPP1CB;PPP1CA	P36873;P62140;P62136	Serine/threonine-protein phosphatase PP1-gamma catalytic subunit;Serine/threonine-protein phosphatase PP1-beta catalytic subunit;Serine/threonine-protein phosphatase PP1-alpha catalytic subunit	P36873;P62140;P62136
26.8774	NaN	NaN	NaN	24.9153	NaN	NaN	NaN	1	1	1	4.1	4.1	4.1	28.837	0	8.0833	154920000	2	AQP2	P41181	Aquaporin-2	P41181
23.5457	NaN	NaN	NaN	22.8863	NaN	NaN	NaN	2	2	2	6.7	6.7	6.7	57.1	0	34.372	19998000	2	SLC1A1	P43005	Excitatory amino acid transporter 3	P43005
26.4479	NaN	NaN	NaN	NaN	22.988	NaN	NaN	1	1	1	6.1	6.1	6.1	22.763	0.0013387	6.5456	99859000	2	PPIC	P45877	Peptidyl-prolyl cis-trans isomerase C	P45877
24.6191	NaN	NaN	NaN	21.2005	NaN	NaN	NaN	3	3	3	7.7	7.7	7.7	53.801	0	20.328	28178000	2	ALDH9A1	P49189	4-trimethylaminobutyraldehyde dehydrogenase	P49189
23.3072	NaN	NaN	NaN	22.7836	NaN	NaN	NaN	8	1	1	14.4	2.2	2.2	70.02	0.0013441	6.5662	17599000	2	HSPA2	P54652	Heat shock-related 70 kDa protein 2	P54652
23.9374	NaN	NaN	NaN	NaN	20.8567	NaN	NaN	2	2	2	2.7	2.7	2.7	89.321	0	12.793	17964000	2	VCP	P55072	Transitional endoplasmic reticulum ATPase	P55072
23.65	NaN	NaN	NaN	21.7324	NaN	NaN	NaN	3	1	1	15.8	5.6	5.6	23.707	0	38.952	16647000	2	RAB5B	P61020	Ras-related protein Rab-5B	P61020
26.4601	NaN	NaN	NaN	22.7822	NaN	NaN	NaN	3	2	2	17	11.5	11.5	22.541	0	15.275	99531000	2	RAB10	P61026	Ras-related protein Rab-10	P61026
25.0634	NaN	NaN	NaN	NaN	NaN	NaN	NaN	2	2	2	8.8	8.8	8.8	24.423	0	13.592	35063000	2	RAN	P62826	GTP-binding nuclear protein Ran	P62826
NaN	NaN	NaN	NaN	21.0385	20.6742	NaN	NaN	16	1	1	56	4.5	4.5	41.792	0	9.4191	3826900	2	ACTG1	P63261	Actin, cytoplasmic 2;Actin, cytoplasmic 2, N-terminally processed	P63261
27.7184	NaN	NaN	NaN	NaN	NaN	NaN	NaN	2	2	2	10.3	10.3	10.3	15.388	0	12.914	220830000	2	HIST2H3A;HIST3H3;H3F3A;HIST1H3A;HIST2H3PS2;H3F3C	Q71DI3;Q16695;P84243;P68431;Q5TEC6;Q6NXT2	Histone H3.2;Histone H3.1t;Histone H3.3;Histone H3.1;Histone H3;Histone H3.3C	Q71DI3;Q16695;P84243;P68431;Q5TEC6;Q6NXT2
23.9354	NaN	NaN	NaN	21.2576	NaN	NaN	NaN	1	1	1	6.1	6.1	6.1	24.488	0	9.5147	18550000	2	CLDN10	P78369	Claudin-10	P78369
23.9088	NaN	NaN	NaN	NaN	20.221	NaN	NaN	1	1	1	5.4	5.4	5.4	20.777	0.0038961	6.2371	16971000	2	GLO1	Q04760	Lactoylglutathione lyase	Q04760
27.4033	NaN	NaN	NaN	NaN	NaN	23.2508	NaN	1	1	1	0.5	0.5	0.5	226.59	0	7.0667	187490000	2	CHD3	Q12873	Chromodomain-helicase-DNA-binding protein 3	Q12873
26.9576	NaN	NaN	NaN	22.8536	NaN	NaN	NaN	4	4	4	3.2	3.2	3.2	217.04	0	24.448	137910000	2	PTPRS	Q13332;A0A0A0MR60	Receptor-type tyrosine-protein phosphatase S;Protein-tyrosine-phosphatase	Q13332;A0A0A0MR60
NaN	NaN	NaN	NaN	26.7927	22.2706	NaN	NaN	1	1	1	1	1	1	89.677	0.0037783	6.0179	121310000	2	CUL1	Q13616	Cullin-1	Q13616
NaN	21.9888	NaN	NaN	NaN	NaN	21.7507	NaN	2	2	2	2.5	2.5	2.5	82.86	0	11.957	7690800	2	PKP1	Q13835	Plakophilin-1	Q13835
25.1094	NaN	NaN	NaN	NaN	NaN	NaN	NaN	2	2	2	10	10	10	35.869	0	11.682	36197000	2	PTGR1	Q14914	Prostaglandin reductase 1	Q14914
23.6581	NaN	NaN	NaN	21.948	NaN	NaN	NaN	1	1	1	5.5	5.5	5.5	23.025	0	7.6916	17283000	2	RAB35	Q15286	Ras-related protein Rab-35	Q15286
NaN	20.1818	NaN	NaN	NaN	NaN	20.6038	NaN	2	2	2	4.6	4.6	4.6	60.673	0	12.664	2782900	2	ECM1	Q16610	Extracellular matrix protein 1	Q16610
26.1632	NaN	NaN	NaN	NaN	NaN	NaN	NaN	2	2	2	6.5	6.5	6.5	46.804	0	18.378	75147000	2	VWA1	Q6PCB0	von Willebrand factor A domain-containing protein 1	Q6PCB0
24.4078	NaN	NaN	NaN	NaN	NaN	NaN	NaN	2	2	2	7.7	7.7	7.7	52.25	0	15.178	22258000	2	BTNL3	Q6UXE8	Butyrophilin-like protein 3	Q6UXE8
25.8209	NaN	NaN	NaN	24.8176	NaN	NaN	NaN	1	1	1	6.9	6.9	6.9	24.269	0	16.514	88843000	2	MAPK1IP1L	Q8NDC0	MAPK-interacting and spindle-stabilizing protein-like	Q8NDC0
24.491	NaN	NaN	NaN	22.5287	NaN	NaN	NaN	1	1	1	20.6	20.6	20.6	6.4069	0	38.145	29630000	2	OCC1	Q8TAD7	Overexpressed in colon carcinoma 1 protein	Q8TAD7
26.2594	NaN	NaN	NaN	22.1306	NaN	NaN	NaN	4	4	4	6.7	6.7	6.7	68.107	0	24.026	84918000	2	ITFG1	Q8TB96	T-cell immunomodulatory protein	Q8TB96
NaN	NaN	NaN	NaN	23.5223	NaN	NaN	NaN	2	2	2	4.6	4.6	4.6	59.856	0	15.883	12048000	2	SLC22A8	Q8TCC7	Solute carrier family 22 member 8	Q8TCC7
NaN	NaN	NaN	27.6371	28.9081	28.3958	NaN	NaN	1	1	1	0.5	0.5	0.5	216.85	0.002656	6.4767	1065600000	2	SHROOM3	Q8TF72	Protein Shroom3	Q8TF72
25.4657	NaN	NaN	NaN	24.3922	NaN	NaN	NaN	1	1	1	2.3	2.3	2.3	54.818	0	8.7036	68356000	2	ZDHHC1	Q8WTX9	Probable palmitoyltransferase ZDHHC1	Q8WTX9
24.0272	NaN	NaN	NaN	NaN	NaN	NaN	NaN	2	2	2	4.2	4.2	4.2	66.84	0	11.924	17097000	2	SLC13A3	Q8WWT9	Solute carrier family 13 member 3	Q8WWT9
24.574	NaN	NaN	NaN	22.621	NaN	NaN	NaN	1	1	1	2.6	2.6	2.6	50.813	0	7.2397	31426000	2	SMPDL3B	Q92485	Acid sphingomyelinase-like phosphodiesterase 3b	Q92485
NaN	NaN	NaN	NaN	NaN	NaN	NaN	NaN	1	1	1	4.1	4.1	4.1	37.765	0	10.104	0	2	GALM	Q96C23	Aldose 1-epimerase	Q96C23
NaN	NaN	NaN	NaN	25.5613	NaN	NaN	NaN	2	2	2	12	12	12	22.739	0	17.223	49513000	2	ZG16B	Q96DA0	Zymogen granule protein 16 homolog B	Q96DA0
NaN	NaN	NaN	NaN	24.0517	NaN	NaN	NaN	3	3	3	8.3	8.3	8.3	51.546	0	20.294	17389000	2	ZFYVE19	Q96K21	Abscission/NoCut checkpoint regulator	Q96K21
23.7319	NaN	NaN	NaN	21.2929	NaN	NaN	NaN	2	2	2	4.9	4.9	4.9	59.63	0	15.794	16502000	2	SLC22A12	Q96S37	Solute carrier family 22 member 12	Q96S37
25.6716	NaN	NaN	NaN	NaN	NaN	NaN	NaN	2	2	2	10.9	10.9	10.9	41.92	0	13.838	53445000	2	VAT1	Q99536	Synaptic vesicle membrane protein VAT-1 homolog	Q99536
23.6509	NaN	NaN	NaN	21.7561	NaN	NaN	NaN	1	1	1	8	8	8	11.438	0.0037736	6.0128	16713000	2	VAMP8	Q9BV40	Vesicle-associated membrane protein 8	Q9BV40
NaN	NaN	NaN	NaN	23.506	NaN	NaN	NaN	2	2	2	1.3	1.3	1.3	596.33	0	19.947	11913000	2	MUC5B	Q9HC84	Mucin-5B	Q9HC84
NaN	NaN	NaN	NaN	25.9654	NaN	NaN	NaN	2	2	2	11.3	11.3	11.3	26.712	0	35.391	65520000	2	BPIFA1	Q9NP55	BPI fold-containing family A member 1	Q9NP55
23.7445	NaN	NaN	NaN	22.894	NaN	NaN	NaN	1	1	1	2	2	2	54.639	0.0013333	6.5276	21848000	2	SLC17A5	Q9NRA2	Sialin	Q9NRA2
25.0667	NaN	NaN	NaN	NaN	NaN	NaN	NaN	2	2	2	5.8	5.8	5.8	55.882	0	14.06	35143000	2	ATP6V1H	Q9UI12	V-type proton ATPase subunit H	Q9UI12
24.6199	NaN	NaN	NaN	NaN	22.7325	NaN	NaN	2	2	2	5.1	5.1	5.1	38.213	0	11.593	32752000	2	ST3GAL6	Q9Y274	Type 2 lactosamine alpha-2,3-sialyltransferase	Q9Y274
24.443	NaN	NaN	NaN	23.064	NaN	NaN	NaN	1	1	1	2.7	2.7	2.7	68.955	0	14.274	31577000	2	VPS9D1	Q9Y2B5	VPS9 domain-containing protein 1	Q9Y2B5
NaN	NaN	NaN	NaN	25.323	NaN	NaN	NaN	2	2	2	7.2	7.2	7.2	25.073	0	10.912	41974000	2	CHMP3	Q9Y3E7;A0A140T963	Charged multivesicular body protein 3	Q9Y3E7;A0A140T963
26.5439	NaN	NaN	NaN	NaN	NaN	NaN	NaN	2	1	1	18.8	9.4	9.4	12.874	0	28.942	97839000	1	IGHV3OR16-12	A0A075B7B8		A0A075B7B8
NaN	NaN	NaN	NaN	23.383	NaN	NaN	NaN	1	1	1	15.4	15.4	15.4	8.749	0.0037831	6.032	10939000	1	SMIM1	B2RUZ4	Small integral membrane protein 1	B2RUZ4
NaN	NaN	NaN	NaN	22.4238	NaN	NaN	NaN	1	1	1	13.7	13.7	13.7	11.18	0	50.921	5626400	1	UMAD1	C9J7I0	UBAP1-MVB12-associated (UMA)-domain containing protein 1	C9J7I0
NaN	NaN	NaN	NaN	NaN	NaN	NaN	NaN	1	1	1	6.9	6.9	6.9	19.438	0	7.9501	0	1	HLA-DMB	F6UB75;P28068	HLA class II histocompatibility antigen, DM beta chain	F6UB75;P28068
23.7249	NaN	NaN	NaN	NaN	NaN	NaN	NaN	1	1	1	14	14	14	13.068	0	8.1946	13865000	1	VAMP3;VAMP2	L7N2F9;Q15836;P63027	Vesicle-associated membrane protein 3;Vesicle-associated membrane protein 2	L7N2F9;Q15836;P63027
25.4956	NaN	NaN	NaN	NaN	NaN	NaN	NaN	1	1	1	4.7	4.7	4.7	23.354	0.0086634	5.9228	47308000	1	SNAP23	O00161	Synaptosomal-associated protein 23	O00161
24.1116	NaN	NaN	NaN	NaN	NaN	NaN	NaN	1	1	1	3.8	3.8	3.8	35.102	0.0037975	6.0718	18127000	1	PDXK	O00764	Pyridoxal kinase	O00764
24.2912	NaN	NaN	NaN	NaN	NaN	NaN	NaN	1	1	1	0.9	0.9	0.9	116.02	0.0098401	5.8763	20530000	1	KIAA0355	O15063	Uncharacterized protein KIAA0355	O15063
24.0018	NaN	NaN	NaN	NaN	NaN	NaN	NaN	1	1	1	1.5	1.5	1.5	56.65	0.001355	6.6781	16798000	1	PHGDH	O43175	D-3-phosphoglycerate dehydrogenase	O43175
NaN	NaN	NaN	NaN	23.1977	NaN	NaN	NaN	1	1	1	23.5	23.5	23.5	7.5217	0	13.809	9620300	1	GNG7	O60262	Guanine nucleotide-binding protein G(I)/G(S)/G(O) subunit gamma-7	O60262
24.8669	NaN	NaN	NaN	NaN	22.3661	NaN	NaN	1	1	1	1.4	1.4	1.4	84.784	0	7.4279	36004000	1	PLOD3	O60568	Procollagen-lysine,2-oxoglutarate 5-dioxygenase 3	O60568
NaN	NaN	NaN	NaN	22.6391	NaN	NaN	NaN	1	1	1	4.9	4.9	4.9	30.669	0	22.747	6531900	1	UPK3A	O75631	Uroplakin-3a	O75631
24.7562	NaN	NaN	NaN	NaN	NaN	NaN	NaN	2	1	1	7.9	4.5	4.5	37.206	0	7.8144	28337000	1	AKR7A3	O95154	Aflatoxin B1 aldehyde reductase member 3	O95154
NaN	NaN	NaN	NaN	NaN	20.2855	NaN	NaN	2	1	1	1.9	1.3	1.3	146.41	0	7.279	1278000	1	ABCB11	O95342	Bile salt export pump	O95342
NaN	NaN	NaN	NaN	20.9	NaN	NaN	NaN	1	1	1	2.1	2.1	2.1	48.076	0.0086527	5.9093	1956700	1	STAMBP	O95630	STAM-binding protein	O95630
NaN	NaN	NaN	NaN	NaN	NaN	NaN	NaN	1	1	1	1.8	1.8	1.8	56.719	0	8.6162	0	1	ANGPTL1	O95841	Angiopoietin-related protein 1	O95841
24.1476	NaN	NaN	NaN	NaN	NaN	NaN	NaN	1	1	1	2.3	2.3	2.3	56.256	0.0026247	6.3386	18585000	1	GSR	P00390	Glutathione reductase, mitochondrial	P00390
23.666	NaN	NaN	NaN	NaN	NaN	NaN	NaN	1	1	1	0.8	0.8	0.8	160.61	0	12.012	13310000	1	COL4A1;COL4A5	P02462;P29400	Collagen alpha-1(IV) chain;Arresten;Collagen alpha-5(IV) chain	P02462;P29400
NaN	20.4874	NaN	NaN	NaN	NaN	NaN	NaN	1	1	1	1.5	1.5	1.5	74.139	0.0038071	6.0913	1470000	1	LMNA	P02545	Prelamin-A/C;Lamin-A/C	P02545
24.4496	NaN	NaN	NaN	NaN	NaN	NaN	NaN	1	1	1	3.1	3.1	3.1	55.928	0.0074534	5.9605	22912000	1	FGB	P02675	Fibrinogen beta chain;Fibrinopeptide B;Fibrinogen beta chain	P02675
24.6579	NaN	NaN	NaN	NaN	NaN	NaN	NaN	1	1	1	4.4	4.4	4.4	51.511	0	7.5609	26471000	1	FGG	P02679	Fibrinogen gamma chain	P02679
23.946	NaN	NaN	NaN	NaN	NaN	NaN	NaN	1	1	1	2.3	2.3	2.3	52.963	0.003871	6.2065	16161000	1	GC	P02774	Vitamin D-binding protein	P02774
NaN	NaN	NaN	NaN	26.2128	NaN	NaN	NaN	2	2	2	14.4	14.4	14.4	14.326	0	14.003	77776000	1	SLPI	P03973	Antileukoproteinase	P03973
NaN	NaN	NaN	NaN	NaN	20.4461	NaN	NaN	1	1	1	3.6	3.6	3.6	56.559	0	9.3926	1428500	1	ATP5B	P06576	ATP synthase subunit beta, mitochondrial	P06576
NaN	NaN	NaN	NaN	NaN	22.179	NaN	NaN	1	1	1	4.6	4.6	4.6	28.741	0	6.9712	4748300	1	KLK3	P07288	Prostate-specific antigen	P07288
24.5732	NaN	NaN	NaN	NaN	NaN	NaN	NaN	1	1	1	7.2	7.2	7.2	19.608	0	7.12	24962000	1	APRT	P07741	Adenine phosphoribosyltransferase	P07741
24.9843	NaN	NaN	NaN	NaN	NaN	NaN	NaN	8	1	1	12.4	1.8	1.8	83.263	0.002642	6.3747	33191000	1	HSP90AB1	P08238	Heat shock protein HSP 90-beta	P08238
NaN	NaN	NaN	NaN	NaN	NaN	NaN	NaN	1	1	1	2.3	2.3	2.3	54.151	0.0013351	6.5348	0	1	MMP10	P09238	Stromelysin-2	P09238
25.1214	NaN	NaN	NaN	NaN	NaN	NaN	NaN	35	1	1	24.9	1.5	1.5	192.78	0	17.814	36501000	1	C4A	P0C0L4	Complement C4-A;Complement C4 beta chain;Complement C4-A alpha chain;C4a anaphylatoxin;C4b-A;C4d-A;Complement C4 gamma chain	P0C0L4
24.1347	NaN	NaN	NaN	NaN	NaN	NaN	NaN	1	1	1	1.7	1.7	1.7	105.32	0	18.62	18419000	1	GAA	P10253	Lysosomal alpha-glucosidase;76 kDa lysosomal alpha-glucosidase;70 kDa lysosomal alpha-glucosidase	P10253
NaN	NaN	NaN	NaN	NaN	20.1456	NaN	NaN	1	1	1	0.9	0.9	0.9	177.6	0	12.102	1159900	1	LAMC1	P11047	Laminin subunit gamma-1	P11047
24.8045	NaN	NaN	NaN	NaN	NaN	NaN	NaN	1	1	1	0.4	0.4	0.4	343.67	0	8.7174	29302000	1	COL6A3	P12111	Collagen alpha-3(VI) chain	P12111
23.3472	NaN	NaN	NaN	NaN	NaN	NaN	NaN	2	1	1	8.4	4.5	4.5	40.156	0	7.6671	10671000	1	HLA-E;HLA-B	P13747;Q31612	HLA class I histocompatibility antigen, alpha chain E;HLA class I histocompatibility antigen, B-73 alpha chain	P13747;Q31612
25.6668	NaN	NaN	NaN	NaN	NaN	NaN	NaN	2	2	2	12	12	12	35.853	0	11.553	53271000	1	AKR1B1	P15121	Aldose reductase	P15121
24.3055	NaN	NaN	NaN	NaN	NaN	NaN	NaN	1	1	1	2.2	2.2	2.2	62.081	0.0013605	6.7887	20734000	1	GNS	P15586	N-acetylglucosamine-6-sulfatase	P15586
25.0728	NaN	NaN	NaN	NaN	NaN	NaN	NaN	1	1	1	1.9	1.9	1.9	69.751	0	7.0014	35291000	1	SMPD1	P17405	Sphingomyelin phosphodiesterase	P17405
23.4569	NaN	NaN	NaN	NaN	NaN	NaN	NaN	1	1	1	3.3	3.3	3.3	39.825	0	11.53	11514000	1	CD33	P20138	Myeloid cell surface antigen CD33	P20138
24.4603	NaN	NaN	NaN	NaN	NaN	NaN	NaN	1	1	1	5.3	5.3	5.3	25.552	0.0038314	6.1167	23083000	1	GPX3	P22352	Glutathione peroxidase 3	P22352
23.7926	NaN	NaN	NaN	NaN	NaN	NaN	NaN	1	1	1	1.8	1.8	1.8	50.878	0.0013459	6.6176	14531000	1	MGAT1	P26572	Alpha-1,3-mannosyl-glycoprotein 2-beta-N-acetylglucosaminyltransferase	P26572
25.061	NaN	NaN	NaN	NaN	NaN	NaN	NaN	1	1	1	7.9	7.9	7.9	27.335	0	13.063	35004000	1	GSTT1	P30711	Glutathione S-transferase theta-1	P30711
24.4075	NaN	NaN	NaN	NaN	20.765	NaN	NaN	1	1	1	1.9	1.9	1.9	58.025	0.0038911	6.2314	24035000	1	GALNS	P34059	N-acetylgalactosamine-6-sulfatase	P34059
24.2081	NaN	NaN	NaN	NaN	NaN	NaN	NaN	1	1	1	0.6	0.6	0.6	312.24	0	8.033	19380000	1	FBN1	P35555	Fibrillin-1	P35555
NaN	NaN	NaN	NaN	21.9071	NaN	NaN	NaN	1	1	1	3.6	3.6	3.6	42.2	0.0098522	5.8925	3932700	1	BSG	P35613	Basigin	P35613
25.378	NaN	NaN	NaN	NaN	NaN	NaN	NaN	2	2	2	10.2	10.2	10.2	26.145	0	15.01	43606000	1	ATP6V1E1	P36543	V-type proton ATPase subunit E 1	P36543
23.7139	NaN	NaN	NaN	NaN	NaN	NaN	NaN	1	1	1	1.6	1.6	1.6	61.448	0.0038363	6.144	13759000	1	PGM1	P36871	Phosphoglucomutase-1	P36871
NaN	NaN	NaN	NaN	22.7397	NaN	NaN	NaN	1	1	1	6.1	6.1	6.1	22.174	0.0038168	6.0984	7003900	1	GPX4	P36969	Phospholipid hydroperoxide glutathione peroxidase, mitochondrial	P36969
NaN	NaN	NaN	NaN	21.3376	NaN	NaN	NaN	1	1	1	4.7	4.7	4.7	31.35	0	9.2643	2650100	1	CAPZB	P47756	F-actin-capping protein subunit beta	P47756
NaN	21.5559	NaN	NaN	NaN	NaN	NaN	NaN	1	1	1	8.1	8.1	8.1	15.075	0	7.0868	3082900	1	LGALS7	P47929	Galectin-7	P47929
24.4268	NaN	NaN	NaN	NaN	19.9362	NaN	NaN	2	2	2	6.4	6.4	6.4	48.455	0	11.081	23555000	1	GATM	P50440	Glycine amidinotransferase, mitochondrial	P50440
NaN	NaN	NaN	NaN	NaN	NaN	NaN	NaN	1	1	1	2.8	2.8	2.8	42.272	0	10.684	0	1	GALK1	P51570	Galactokinase	P51570
25.4002	NaN	NaN	NaN	NaN	NaN	NaN	NaN	2	2	2	7.9	7.9	7.9	53.139	0	14.069	44283000	1	PGD	P52209	6-phosphogluconate dehydrogenase, decarboxylating	P52209
23.6494	NaN	NaN	NaN	NaN	20.7656	NaN	NaN	2	2	2	10.5	10.5	10.5	32.922	0	11.625	14940000	1	CAPZA1;CAPZA2	P52907;P47755	F-actin-capping protein subunit alpha-1;F-actin-capping protein subunit alpha-2	P52907;P47755
NaN	NaN	NaN	NaN	21.9673	NaN	NaN	NaN	1	1	1	10	10	10	20.324	0.0037641	6.0071	4100300	1	PTTG1IP	P53801	Pituitary tumor-transforming gene 1 protein-interacting protein	P53801
24.7565	NaN	NaN	NaN	NaN	NaN	NaN	NaN	1	1	1	1.9	1.9	1.9	65.939	0.0039216	6.2853	28343000	1	ARSF	P54793	Arylsulfatase F	P54793
23.5926	NaN	NaN	NaN	NaN	NaN	NaN	NaN	1	1	1	7.9	7.9	7.9	18.506	0	7.2569	12650000	1	DSTN	P60981	Destrin	P60981
23.477	NaN	NaN	NaN	23.0082	NaN	NaN	NaN	2	2	2	9.2	9.2	9.2	25.206	0	11.51	20112000	1	GRB2	P62993	Growth factor receptor-bound protein 2	P62993
26.6931	NaN	NaN	NaN	NaN	NaN	NaN	NaN	8	2	1	29.2	9.4	6.1	49.83	0	16.891	108500000	1	TUBB4B;TUBB4A	P68371;P04350	Tubulin beta-4B chain;Tubulin beta-4A chain	P68371;P04350
23.9925	NaN	NaN	NaN	NaN	NaN	NaN	NaN	1	1	1	1.3	1.3	1.3	86.955	0.0038023	6.0913	16690000	1	APLP2	Q06481	Amyloid-like protein 2	Q06481
NaN	NaN	NaN	NaN	22.8674	NaN	NaN	NaN	2	2	2	2.5	2.5	2.5	114.74	0	11.756	7651800	1	PCDH1	Q08174	Protocadherin-1	Q08174
NaN	NaN	NaN	NaN	NaN	21.488	NaN	NaN	1	1	1	3.6	3.6	3.6	35.206	0.0038119	6.0976	2941300	1	CRYZ	Q08257	Quinone oxidoreductase	Q08257
NaN	NaN	NaN	NaN	22.6103	NaN	NaN	NaN	1	1	1	0.8	0.8	0.8	145.94	0	8.1959	6403000	1	PTPRJ	Q12913	Receptor-type tyrosine-protein phosphatase eta	Q12913
NaN	NaN	NaN	NaN	23.8207	NaN	NaN	NaN	1	1	1	2.9	2.9	2.9	64.409	0	7.1329	14817000	1	SLC13A2	Q13183	Solute carrier family 13 member 2	Q13183
24.5885	NaN	NaN	NaN	NaN	NaN	NaN	NaN	2	2	2	6.2	6.2	6.2	33.155	0	11.851	25228000	1	STX3	Q13277	Syntaxin-3	Q13277
20.8912	NaN	NaN	NaN	NaN	NaN	NaN	NaN	1	1	1	3.9	3.9	3.9	56.629	0	10.931	1944800	1	DPYS	Q14117	Dihydropyrimidinase	Q14117
NaN	NaN	NaN	NaN	21.7417	NaN	NaN	NaN	1	1	1	4.5	4.5	4.5	44.049	0	9.2373	3506800	1	GNA13	Q14344	Guanine nucleotide-binding protein subunit alpha-13	Q14344
NaN	NaN	NaN	NaN	NaN	NaN	21.8465	NaN	1	1	1	7.4	7.4	7.4	16.511	0.008642	5.9055	3770900	1	CST6	Q15828	Cystatin-M	Q15828
24.9328	NaN	NaN	NaN	NaN	NaN	NaN	NaN	1	1	1	4.2	4.2	4.2	28.565	0	10.71	32027000	1	SYPL1	Q16563	Synaptophysin-like protein 1	Q16563
27.881	NaN	NaN	NaN	NaN	NaN	NaN	NaN	1	1	1	0.6	0.6	0.6	142.06	0.003861	6.1805	247190000	1	ARHGAP29	Q52LW3	Rho GTPase-activating protein 29	Q52LW3
NaN	NaN	NaN	NaN	23.935	NaN	NaN	NaN	1	1	1	3.2	3.2	3.2	71.109	0	23.194	16038000	1	SLC6A19	Q695T7	Sodium-dependent neutral amino acid transporter B(0)AT1	Q695T7
24.6259	NaN	NaN	NaN	NaN	NaN	NaN	NaN	1	1	1	0.4	0.4	0.4	250.53	0.003876	6.2167	25890000	1	CSPG4	Q6UVK1	Chondroitin sulfate proteoglycan 4	Q6UVK1
24.2763	NaN	NaN	NaN	NaN	NaN	NaN	NaN	1	1	1	4.8	4.8	4.8	36.06	0	10.806	20319000	1	CD300LG	Q6UXG3	CMRF35-like molecule 9	Q6UXG3
25.1189	NaN	NaN	NaN	NaN	NaN	NaN	NaN	1	1	1	4.5	4.5	4.5	25.913	0.003886	6.2253	36438000	1	DCXR	Q7Z4W1	L-xylulose reductase	Q7Z4W1
24.3627	NaN	NaN	NaN	NaN	NaN	NaN	NaN	1	1	1	2.5	2.5	2.5	49.395	0	7.3165	21572000	1	GPR180	Q86V85	Integral membrane protein GPR180	Q86V85
NaN	NaN	NaN	NaN	24.1043	NaN	NaN	NaN	7	1	1	13.7	2.3	2.3	63.107	0	9.0247	18035000	1	CPNE8	Q86YQ8	Copine-8	Q86YQ8
24.3194	18.9138	NaN	NaN	NaN	NaN	NaN	NaN	2	2	2	1.7	1.7	1.7	184.53	0	10.446	21429000	1	SAMD9L	Q8IVG5	Sterile alpha motif domain-containing protein 9-like	Q8IVG5
22.5642	NaN	NaN	NaN	NaN	NaN	NaN	NaN	1	1	1	2.5	2.5	2.5	45.873	0	7.1221	6201500	1	GCNT2	Q8N0V5	N-acetyllactosaminide beta-1,6-N-acetylglucosaminyl-transferase, isoform A	Q8N0V5
NaN	NaN	NaN	NaN	22.3922	NaN	NaN	NaN	1	1	1	3.2	3.2	3.2	40.214	0.0013514	6.6467	5504600	1	SLC35F6	Q8N357	Solute carrier family 35 member F6	Q8N357
NaN	NaN	NaN	NaN	23.3733	NaN	NaN	NaN	1	1	1	4.3	4.3	4.3	32.837	0.0026281	6.3387	10866000	1	NAT8L	Q8N9F0	N-acetylaspartate synthetase	Q8N9F0
22.597	NaN	NaN	NaN	NaN	NaN	NaN	NaN	1	1	1	2.1	2.1	2.1	71.158	0.0013495	6.635	6344200	1	GALNT6	Q8NCL4	Polypeptide N-acetylgalactosaminyltransferase 6	Q8NCL4
NaN	NaN	NaN	NaN	NaN	NaN	NaN	NaN	1	1	1	5.8	5.8	5.8	25.321	0	7.1936	0	1	CLRN3	Q8NCR9	Clarin-3	Q8NCR9
NaN	NaN	NaN	NaN	22.2788	NaN	NaN	NaN	1	1	1	0.6	0.6	0.6	140.02	0.0062189	5.9791	5088400	1	EHBP1	Q8NDI1	EH domain-binding protein 1	Q8NDI1
24.7452	NaN	NaN	NaN	22.9856	20.2936	NaN	NaN	1	1	1	14.3	14.3	14.3	8.4426	0	7.3044	37713000	1	SVIP	Q8NHG7	Small VCP/p97-interacting protein	Q8NHG7
NaN	20.8198	NaN	NaN	NaN	NaN	NaN	NaN	1	1	1	1.7	1.7	1.7	68.064	0.0013477	6.6322	1850900	1	POF1B	Q8WVV4	Protein POF1B	Q8WVV4
23.7788	NaN	NaN	NaN	NaN	NaN	NaN	NaN	1	1	1	7	7	7	24.68	0	8.6516	14392000	1	FAM3C	Q92520	Protein FAM3C	Q92520
NaN	NaN	NaN	NaN	NaN	25.6542	NaN	NaN	1	1	1	0.9	0.9	0.9	97.68	0.0098644	5.8932	52806000	1	ARMC5	Q96C12	Armadillo repeat-containing protein 5	Q96C12
NaN	NaN	NaN	NaN	NaN	NaN	21.2326	NaN	1	1	1	11.7	11.7	11.7	11.801	0.003856	6.1772	2464100	1	S100A16	Q96FQ6	Protein S100-A16	Q96FQ6
23.8434	NaN	NaN	NaN	NaN	NaN	NaN	NaN	1	1	1	4	4	4	29.965	0.0038217	6.1018	15051000	1	PSMB7	Q99436	Proteasome subunit beta type-7	Q99436
NaN	NaN	NaN	NaN	NaN	NaN	NaN	NaN	1	1	1	2.5	2.5	2.5	46.971	0.0037547	5.999	0	1	ERP44	Q9BS26	Endoplasmic reticulum resident protein 44	Q9BS26
24.1286	NaN	NaN	NaN	NaN	NaN	NaN	NaN	1	1	1	3.2	3.2	3.2	54.066	0	9.6002	18342000	1	FUCA2	Q9BTY2	Plasma alpha-L-fucosidase	Q9BTY2
NaN	NaN	NaN	NaN	22.7029	NaN	NaN	NaN	1	1	1	14.2	14.2	14.2	12.854	0	7.1086	6827300	1	CRB3	Q9BUF7	Protein crumbs homolog 3	Q9BUF7
NaN	NaN	NaN	NaN	NaN	NaN	NaN	NaN	1	1	1	5.7	5.7	5.7	24.701	0	6.9096	0	1	PDCD10	Q9BUL8	Programmed cell death protein 10	Q9BUL8
NaN	NaN	NaN	NaN	NaN	20.7099	NaN	NaN	1	1	1	2.4	2.4	2.4	47.754	0.0026212	6.3215	1715200	1	AMN	Q9BXJ7	Protein amnionless	Q9BXJ7
NaN	NaN	NaN	NaN	21.5459	NaN	NaN	NaN	1	1	1	4.6	4.6	4.6	29.203	0.0013624	6.7947	3061600	1	CTDSP1	Q9GZU7	Carboxy-terminal domain RNA polymerase II polypeptide A small phosphatase 1	Q9GZU7
NaN	NaN	NaN	NaN	22.5872	NaN	NaN	NaN	1	1	1	6.7	6.7	6.7	35.117	0	10.108	6301300	1	C11orf54	Q9H0W9	Ester hydrolase C11orf54	Q9H0W9
NaN	NaN	NaN	NaN	21.9726	NaN	NaN	NaN	1	1	1	7.1	7.1	7.1	22.149	0	30.497	4115300	1	DNAJC5	Q9H3Z4	DnaJ homolog subfamily C member 5	Q9H3Z4
NaN	NaN	NaN	NaN	22.6046	NaN	NaN	NaN	1	1	1	8.4	8.4	8.4	17.218	0	7.2502	6377700	1	GLIPR2	Q9H4G4	Golgi-associated plant pathogenesis-related protein 1	Q9H4G4
NaN	NaN	NaN	NaN	22.6406	NaN	NaN	NaN	1	1	1	4	4	4	37.005	0.0038412	6.156	6538800	1	PLSCR4	Q9NRQ2	Phospholipid scramblase 4	Q9NRQ2
NaN	NaN	NaN	NaN	22.6533	NaN	NaN	NaN	1	1	1	2.9	2.9	2.9	50.494	0	16.298	6596600	1	SERINC1	Q9NRX5	Serine incorporator 1	Q9NRX5
24.6065	NaN	NaN	NaN	24.208	NaN	NaN	NaN	1	1	1	3.3	3.3	3.3	61.388	0	20.499	44925000	1	LMBRD1	Q9NUN5	Probable lysosomal cobalamin transporter	Q9NUN5
NaN	NaN	NaN	NaN	NaN	NaN	22.9988	NaN	1	1	1	0.8	0.8	0.8	93.351	0.00625	5.9895	8381700	1	SMPD4	Q9NXE4	Sphingomyelin phosphodiesterase 4	Q9NXE4
24.2706	NaN	NaN	NaN	NaN	NaN	NaN	NaN	1	1	1	7.2	7.2	7.2	23.85	0	7.6463	20238000	1	GLTP	Q9NZD2	Glycolipid transfer protein	Q9NZD2
24.7017	NaN	NaN	NaN	NaN	NaN	NaN	NaN	1	1	1	1.3	1.3	1.3	113.74	0	11.479	27287000	1	CRIM1	Q9NZV1	Cysteine-rich motor neuron 1 protein;Processed cysteine-rich motor neuron 1 protein	Q9NZV1
NaN	NaN	NaN	NaN	24.858	NaN	NaN	NaN	1	1	1	7	7	7	260.73	0	11.981	30409000	1	DMBT1	Q9UGM3	Deleted in malignant brain tumors 1 protein	Q9UGM3
NaN	NaN	NaN	NaN	21.4596	NaN	NaN	NaN	1	1	1	2.9	2.9	2.9	56.882	0	7.639	2883900	1	BAIAP2L1	Q9UHR4	Brain-specific angiogenesis inhibitor 1-associated protein 2-like protein 1	Q9UHR4
NaN	NaN	NaN	NaN	NaN	NaN	21.3603	NaN	1	1	1	3.1	3.1	3.1	47.351	0.0039267	6.3138	2692100	1	CPA4	Q9UI42	Carboxypeptidase A4	Q9UI42
24.6106	NaN	NaN	NaN	NaN	NaN	NaN	NaN	1	1	1	2.4	2.4	2.4	79.663	0	7.1731	25617000	1	APPL1	Q9UKG1	DCC-interacting protein 13-alpha	Q9UKG1
25.2675	NaN	NaN	NaN	NaN	NaN	NaN	NaN	2	2	2	4.5	4.5	4.5	55.051	0	10.83	40391000	1	MINPP1	Q9UNW1	Multiple inositol polyphosphate phosphatase 1	Q9UNW1
24.1634	NaN	NaN	NaN	NaN	NaN	NaN	NaN	3	1	1	7.2	2.7	2.7	62.735	0	8.6221	18789000	1	GPC6	Q9Y625	Glypican-6;Secreted glypican-6	Q9Y625
24.8797	NaN	NaN	NaN	NaN	NaN	NaN	NaN	1	1	1	1.3	1.3	1.3	121.46	0.0026455	6.4185	30869000	1	SLC4A4	Q9Y6R1	Electrogenic sodium bicarbonate cotransporter 1	Q9Y6R1
NaN	NaN	NaN	NaN	21.8124	21.128	NaN	NaN	1	1	1	9.5	9.5	9.5	12.506	0.0074442	5.9516	5974600	0		P01766	Ig heavy chain V-III region BRO	P01766
24.0266	NaN	NaN	NaN	NaN	NaN	NaN	NaN	1	1	1	1.4	1.4	1.4	102.49	0.0013316	6.5155	17089000	0	COPB2	P35606	Coatomer subunit beta	P35606
NaN	NaN	NaN	NaN	NaN	NaN	18.317	NaN	1	1	1	2.6	2.6	2.6	50.976	0.0062422	5.988	326560	0	HNRNPK	P61978	Heterogeneous nuclear ribonucleoprotein K	P61978
23.3716	NaN	NaN	NaN	NaN	NaN	NaN	NaN	1	1	1	1.3	1.3	1.3	104.55	0.0037688	6.0125	10853000	0	AP2B1;AP1B1	P63010;Q10567	AP-2 complex subunit beta;AP-1 complex subunit beta-1	P63010;Q10567
23.5579	NaN	NaN	NaN	NaN	NaN	NaN	NaN	1	1	1	3.4	3.4	3.4	57.488	0	7.1863	12349000	0	CCT2	P78371	T-complex protein 1 subunit beta	P78371
NaN	NaN	NaN	NaN	21.7369	NaN	NaN	NaN	1	1	1	0.3	0.3	0.3	462.52	0.0062344	5.988	3495000	0	PKD1	P98161	Polycystin-1	P98161
23.9525	NaN	NaN	NaN	22.0795	NaN	NaN	NaN	1	1	1	2.8	2.8	2.8	52.39	0.003881	6.2224	20666000	0	SELENBP1	Q13228	Selenium-binding protein 1	Q13228
23.7256	NaN	NaN	NaN	NaN	NaN	NaN	NaN	1	1	1	1.2	1.2	1.2	134.26	0	8.459	13871000	0	CRB2	Q5IJ48	Protein crumbs homolog 2	Q5IJ48
NaN	NaN	NaN	NaN	21.8528	NaN	NaN	NaN	1	1	1	2.9	2.9	2.9	57.544	0.0013423	6.5536	3787400	0	TTYH3	Q9C0H2	Protein tweety homolog 3	Q9C0H2
23.7473	NaN	NaN	NaN	NaN	NaN	NaN	NaN	1	1	1	4.5	4.5	4.5	44.743	0.0038462	6.1636	14082000	0	OLA1	Q9NTK5	Obg-like ATPase 1	Q9NTK5
24.3613	NaN	NaN	NaN	NaN	NaN	NaN	NaN	1	1	1	1.6	1.6	1.6	113.98	0.0013369	6.5443	21551000	0	MAN2B2	Q9Y2E5	Epididymis-specific alpha-mannosidase	Q9Y2E5
